# Supplementary material for: MCPH1 inhibits Condensin II during interphase by regulating its SMC2-Kleisin interface
Source: PubMed Central journal article supplement (PMC8673838; doi:10.7554/elife.73348), 2021-12-01
Supplement: elife-73348-transrepform1.pdf [file elife-73348-transrepform1.pdf]

## eLife's transparent reporting form

We encourage authors to provide detailed information *within their submission* to facilitate the interpretation and replication of experiments. Authors can upload supporting documentation to indicate the use of appropriate reporting guidelines for health-related research (see [EQUATOR Network](#)), life science research (see the [BioSharing Information Resource](#)), or the [ARRIVE guidelines](#) for reporting work involving animal research. Where applicable, authors should refer to any relevant reporting standards documents in this form.

If you have any questions, please consult our Journal Policies and/or contact us: [editorial@elifesciences.org](mailto:editorial@elifesciences.org).

### Sample-size estimation

- You should state whether an appropriate sample size was computed when the study was being designed
- You should state the statistical method of sample size computation and any required assumptions
- If no explicit power analysis was used, you should describe how you decided what sample (replicate) size (number) to use

Please outline where this information can be found within the submission (e.g., sections or figure legends), or explain why this information doesn't apply to your submission:

Not applicable to this work.

### Replicates

- You should report how often each experiment was performed
- You should include a definition of biological versus technical replication
- The data obtained should be provided and sufficient information should be provided to indicate the number of independent biological and/or technical replicates
- If you encountered any outliers, you should describe how these were handled
- Criteria for exclusion/inclusion of data should be clearly stated
- High-throughput sequence data should be uploaded before submission, with a private link for reviewers provided (these are available from both GEO and ArrayExpress)

Please outline where this information can be found within the submission (e.g., sections or figure legends), or explain why this information doesn't apply to your submission:

-Immunofluorescence experiments were repeated three times or more. When cell counting was involved a minimum of 200 cells were counted from two different experiments. Scale bars are indicated on each panel and figure legend.

-Experiments using mouse oocytes were done using a more limited amount of cells for ethical reasons. All the results are based on three independent experiments performed on different days during which oocytes were isolated from different animals of the same genotype.

-FRAP data and the detailed numbers of cells and quantification are in the source data provided.

-Fluorescence quantification detailed numbers of cells and quantification are in the source data provided.

-Western blots and immunoprecipitations were repeated at least three times.

-Fluorescence polarisation assays in figure 5 F and G were performed with three technical repeats, reading the plate three and four times respectively, with 5 minutes intervals between reads to ensure equilibrium had been reached.

-ATPase assays in figure 7 A were performed with 3 technical repeats and rate was fit on first 60 minutes of data where the rate is linear. Error bars represent one standard deviation.

All these pieces of information can be found in the figure legend or in the Method section.

### Statistical reporting

- Statistical analysis methods should be described and justified
- Raw data should be presented in figures whenever informative to do so (typically when N per group is less than 10)
- For each experiment, you should identify the statistical tests used, exact values of N, definitions of center, methods of multiple test correction, and dispersion and precision measures (e.g., mean, median, SD, SEM, confidence intervals; and, for the major substantive results, a measure of effect size (e.g., Pearson's r, Cohen's d)
- Report exact p-values wherever possible alongside the summary statistics and 95% confidence intervals. These should be reported for all key questions and not only when the p-value is less than 0.05.

Please outline where this information can be found within the submission (e.g., sections or figure legends), or explain why this information doesn't apply to your submission:

Details of data normalisation, fitting and statistical analysis provided in materials and methods or figure legend.

(For large

datasets, or papers with a very large number of statistical tests, you may upload a single table file with tests, Ns, etc., with reference to sections in the manuscript.)

### Group allocation

- Indicate how samples were allocated into experimental groups (in the case of clinical studies, please specify allocation to treatment method); if randomization was used, please also state if restricted randomization was applied
- Indicate if masking was used during group allocation, data collection and/or data analysis

Please outline where this information can be found within the submission (e.g., sections or figure legends), or explain why this information doesn't apply to your submission:

Not applicable to this work.

### Additional data files ("source data")

- We encourage you to upload relevant additional data files, such as numerical data that are represented as a graph in a figure, or as a summary table
- Where provided, these should be in the most useful format, and they can be uploaded as "Source data" files linked to a main figure or table
- Include model definition files including the full list of parameters used
- Include code used for data analysis (e.g., R, MatLab)
- Avoid stating that data files are "available upon request"

Please indicate the figures or tables for which source data files have been provided:

Figure 1  
Figure1\_figure supplement 1  
Figure 2  
Figure 3  
Figure 5  
Figure 5\_figure supplement 1  
Figure 6  
Figure 7  
Figure 8  
Figure 9  
Figure 10\_figure supplement 1
