# Supplementary material for: MCPH1 inhibits Condensin II during interphase by regulating its SMC2-Kleisin interface
Source: eLife. 2021 Dec 1;10:e73348. doi: 10.7554/eLife.73348 (PMC8673838; doi:10.7554/eLife.73348)
Supplement: Figure 2—source data 1. [file elife-73348-fig2-data1.xlsx]

## Sheet: Sheet1
Date: 18/10/2019	WILD TYPE
Report: Normalized Data using Double Method
Prebleach Values: 50
Bleach Values: 0
Postbleach Values: 450
Initial Deleted Values: 10
Time (seconds)	Mean Values	Standard Deviation	20190826-WT12.csv	20190826-WT13.csv	20190826-WT21.csv	20190826-WT22.csv	20190826-WT23.csv	20190826-WT24.csv	20190826-WT31.csv	20190826-WT32.csv	20190826-WT33.csv	20190826-WT41.csv	20190826-WT42.csv	20190826-WT43.csv	20190826-WT51.csv	20190826-WT52.csv	20190826-WT53.csv	20190826-WT54.csv	20190826-WT55.csv	20190826-WT61.csv	20190826-WT63.csv	20190826-WT64.csv	20190826-WT71.csv	20190826-WT72.csv	20190826-WT81.csv	20190826-WT82.csv	20190826-WT83.csv	20190826-WT91.csv	20190826-WT92.csv	20190826-WT93.csv
1.54	1.01229	0.05921	0.944071	1.00257	1.08597	1.02484	0.938809	1.009	1.15954	1.03448	1.02097	1.06599	1.05424	0.988906	0.995281	1.11896	1.00802	0.977846	1.05912	1.01168	1.00745	1.02412	1.04381	0.875813	0.923063	1.01119	0.944319	1.01037	1.04553	0.958121
1.68	0.983593	0.066134	0.972385	1.0351	1.04934	0.931342	1.03787	0.982977	1.04544	0.976981	1.07666	0.976804	0.938118	0.919491	0.860343	0.950657	1.05256	0.976301	0.923158	1.14027	0.927024	1.0223	1.00989	0.965131	0.875121	0.882146	0.960743	1.06689	1.02328	0.962304
1.82	0.998102	0.054765	0.98455	0.995177	0.947777	1.10155	1.00302	1.06377	0.949339	0.943615	0.947218	1.02503	0.992574	0.974565	1.02287	0.936699	0.901326	1.07887	1.0579	1.02873	0.972098	1.07262	0.915788	0.969933	0.952277	1.05493	0.99331	1.08454	1.02282	0.953951
1.96	0.98638	0.053325	0.989146	1.00462	1.08873	1.03312	0.90941	1.02919	1.00164	0.951975	1.07404	0.997853	0.949535	1.0239	0.941101	0.839531	1.01771	0.943646	0.924295	0.962204	0.976331	1.01314	0.942696	1.02645	0.969215	1.00773	1.01128	1.05553	0.998565	0.936083
2.1	1.01128	0.055504	1.01765	1.04109	1.05611	0.982933	0.956708	1.04378	1.0557	0.885306	1.05538	0.989208	0.990353	0.985322	1.09167	0.997558	1.04054	1.0811	1.00075	1.146	0.905206	0.984435	0.943771	0.953464	0.988071	1.02612	1.04282	1.0144	1.04832	0.992098
2.24	1.00608	0.057866	0.957319	1.00776	0.952181	0.943212	0.965619	0.928448	1.08564	0.964569	1.04371	1.02514	1.07854	1.03346	1.02194	0.988345	0.927363	1.03113	0.934069	1.11494	1.09454	0.97343	0.971721	1.01607	1.05285	1.0183	1.04535	1.10613	0.972124	0.916444
2.38	1.01539	0.060606	0.934099	1.08627	0.954514	1.12994	0.933517	1.06109	0.995537	1.06868	1.06633	0.971197	1.03177	1.05998	1.11	0.933145	1.00314	1.02883	1.01976	1.09556	0.913884	1.00633	0.943843	0.969835	1.06379	1.04221	1.0249	0.924796	1.0353	1.02273
2.52	1.00904	0.060908	0.972594	1.01472	1.09435	0.955017	0.894587	1.01142	1.0276	0.913051	1.02168	1.01059	1.04807	1.00498	0.897082	0.973186	1.01631	0.995153	1.03512	1.09675	1.04756	0.895453	1.0011	1.0377	1.08767	0.963497	1.09269	1.0866	0.982078	1.07641
2.66	0.99239	0.069609	0.984871	1.01549	0.898782	1.15559	0.909224	0.933988	0.98737	0.872062	0.92917	0.932022	0.94446	0.948076	1.02714	1.00262	1.00207	0.951281	1.17454	1.0801	0.962039	1.05284	1.01317	0.945262	0.993463	1.01461	1.00516	0.967777	1.02251	1.06123
2.8	1.0037	0.064779	1.00512	1.04777	1.04952	1.04273	1.09291	0.97606	0.936977	0.956628	1.01191	1.03823	0.948788	1.01748	0.934533	0.960844	0.89917	1.0067	1.16579	1.07919	0.896626	0.971253	0.93944	0.972815	1.09973	1.07789	1.03107	1.03161	0.959681	0.953111
2.94	1.01745	0.066217	0.897541	0.969002	1.02745	0.964819	1.0227	1.00301	0.962542	1.07021	1.12228	1.11485	0.983406	0.967972	0.987804	1.01512	1.02996	1.00185	1.05831	1.22435	0.98387	0.956149	1.00934	1.00504	1.10909	1.01313	1.01609	1.02426	1.02716	0.921291
3.08	0.994095	0.056386	1.06423	1.03536	1.0211	1.01122	0.911388	1.05182	0.882732	0.95905	1.06497	0.896577	0.971206	0.995201	0.939023	1.03032	1.06242	0.990003	1.0165	1.08762	0.871754	1.01279	0.976838	0.998036	1.02851	1.00887	0.95623	1.00338	0.958358	1.02912
3.22	1.00043	0.057992	1.0033	1.00413	1.02469	1.08479	1.01185	1.02473	0.97009	1.0115	0.972234	1.12492	1.01058	0.937039	0.9584	0.840632	1.07533	1.07286	0.996333	1.03703	0.956375	1.05539	0.956728	0.92146	1.03459	0.978272	1.05084	0.975783	0.947371	0.974827
3.36	1.01557	0.061849	1.01859	0.972156	0.984139	1.08178	1.06091	1.0179	1.0425	0.897424	1.11414	1.00413	1.06896	0.999548	1.01323	1.19294	0.998344	0.992796	1.05496	1.00775	0.980285	1.00633	1.10415	0.942007	1.0078	0.948602	0.932307	0.937591	1.02619	1.02846
3.5	0.998078	0.058003	0.923722	0.987835	1.00591	1.16838	0.855332	0.937063	1.04191	0.971572	0.997778	1.05494	0.95417	0.993461	0.965768	1.08802	1.01839	1.03092	1.00527	0.943088	0.968754	1.01875	0.989542	1.02598	1.04849	1.04155	0.949871	1.00851	0.959469	0.991739
3.64	1.00064	0.056137	1.0038	0.94585	1.03548	1.09856	1.06839	1.04326	0.942649	0.950772	1.01967	1.03209	1.01561	0.945374	0.889066	1.01545	1.02156	1.03882	0.913674	0.919836	1.03312	0.925968	1.05896	1.02356	1.0741	0.963326	0.944399	1.06998	1.00389	1.02074
3.78	1.00165	0.047969	0.972488	0.966977	0.99973	0.977492	1.0723	0.969155	1.0949	0.996544	1.00703	1.02864	1.08644	1.01789	1.00523	1.0444	1.04623	1.07589	0.917746	0.972547	1.04623	0.93403	0.964671	0.971853	0.963287	1.05373	0.949451	0.99055	0.956957	0.963745
3.92	1.00293	0.065127	1.03787	1.03533	0.917458	0.990954	0.888673	1.00365	1.06259	1.091	0.997577	1.07141	1.00189	0.97159	0.937361	0.936758	1.10884	1.11643	0.881366	1.03499	0.949365	0.908177	0.976951	0.958669	1.036	1.10097	1.00698	1.01188	1.02507	1.02225
4.06	0.981799	0.060617	0.998927	0.930804	0.961517	0.88365	0.891987	1.00661	0.974921	1.07719	0.998816	0.91531	0.956935	1.04708	1.03586	1.04849	0.999456	0.979358	0.885353	0.983657	1.05027	1.00208	0.989139	1.06713	0.993266	0.854704	0.960966	0.955931	1.08772	0.953242
4.2	1.00095	0.048652	0.998082	1.06017	1.08182	1.08084	0.965749	0.989688	1.04166	1.02341	1.00509	1.01095	0.971629	0.984152	0.952271	1.05259	0.955365	0.979312	0.908752	1.05824	1.05362	1.00141	1.00396	1.00632	0.907429	1.01068	0.926266	0.944931	1.05515	0.997131
4.34	0.988431	0.050474	0.92013	0.96389	0.991186	0.928589	1.04251	0.995291	1.03302	1.02139	0.880721	0.962045	0.996143	1.00118	0.945218	1.06455	1.01746	0.988778	0.997822	1.00243	1.05333	1.05856	1.06706	1.021	1.02119	0.925807	0.94473	0.974077	0.960725	0.897206
4.48	1.00591	0.063027	1.06027	0.96202	0.938922	0.972795	0.81943	1.10038	1.10294	1.0425	0.951793	0.985638	0.998641	1.05516	1.04793	1.10936	1.04935	1.00124	0.9359	1.02176	0.979137	0.953199	0.993017	1.08529	0.982365	1.00946	1.05108	0.95221	0.974393	1.02922
4.62	1.00647	0.05449	1.0088	1.03805	0.977096	1.00006	0.97307	1.03352	0.88747	1.05054	0.924444	0.907793	1.04631	1.0234	1.0377	1.09929	1.02575	1.06369	1.03056	1.02909	0.992525	0.955567	1.06595	1.05624	0.931134	1.073	1.0521	0.945976	0.952124	0.999954
4.76	0.997858	0.067592	0.992401	1.00134	0.901674	1.01894	1.12374	0.966929	1.03696	0.952652	0.976362	0.94661	1.09926	0.98022	1.03879	0.959167	0.984559	0.99447	1.03506	1.01612	1.174	0.889984	0.91176	1.05716	0.915519	1.05701	0.995611	0.912823	1.04144	0.959456
4.9	1.01268	0.062276	1.04854	0.985533	0.878593	1.00188	1.0492	0.931907	0.906784	1.07415	1.05646	1.01719	0.980949	0.990051	1.03993	1.02343	1.00477	1.01171	1.09425	0.979602	1.0513	0.977846	1.19223	1.06391	1.00264	1.0525	1.0166	0.942638	0.943145	1.03738
5.04	1.01438	0.06617	0.999984	0.969962	0.910292	0.989914	1.03591	1.06977	0.921817	1.07329	1.10085	0.982406	0.97633	1.01091	1.05297	0.897025	0.995156	1.07063	1.09916	0.959983	1.0691	1.06682	0.982234	1.06399	0.975769	0.940906	1.19068	0.982117	1.03723	0.977468
5.18	1.00599	0.063607	0.966682	0.917722	0.993732	1.00038	1.0428	0.999634	1.01204	1.07966	1.04416	1.04158	1.10823	0.967121	1.10649	0.977379	0.947008	0.994332	1.13775	0.890075	0.943499	0.969438	1.06954	0.919851	1.09549	1.01519	0.928095	1.03521	0.983638	0.980947
5.32	1.00541	0.051479	0.890964	0.934466	1.00183	0.969645	1.06767	0.999101	0.975345	1.03434	1.02507	1.01895	1.05124	0.999429	0.990557	1.06336	0.904277	0.935023	1.02276	1.02597	1.01995	0.95296	1.1204	0.982416	1.06358	0.979599	1.01218	1.05014	1.04129	1.01906
5.46	1.01058	0.059113	1.11604	0.943672	1.01976	1.04226	0.988061	0.966413	1.04203	0.986774	0.987156	0.879778	1.03024	1.03159	1.05944	0.969574	0.920357	0.954593	1.10628	0.999574	1.05976	1.0308	0.987055	1.02709	1.01735	1.02813	0.904672	1.00654	1.11613	1.07506
5.6	1.00542	0.043468	1.09078	0.954765	1.00481	1.02004	1.04227	0.976072	0.927334	1.05081	1.04848	0.984161	0.991728	1.03297	1.00224	1.02514	0.950058	1.00812	0.992489	1.02553	0.999908	1.11586	0.978141	0.972366	1.05115	1.02911	0.96598	0.950795	0.960825	0.99987
5.74	1.00144	0.05654	0.986375	1.01415	1.03699	0.943039	1.005	0.969245	0.969678	0.988607	0.988395	1.00647	1.08361	1.01637	1.00679	0.968221	1.02731	0.938232	1.03035	0.963874	0.964526	1.08702	1.14833	1.10248	0.896486	0.95117	0.946882	0.949366	0.987487	1.06403
5.88	0.984128	0.064356	1.0072	0.998416	1.07335	0.950599	1.07146	0.953632	0.99265	0.977441	0.970467	1.08515	0.937329	0.989921	0.996607	0.870997	0.951749	0.930337	0.924145	0.876681	0.871779	1.08392	1.06037	1.0449	0.973442	0.935953	1.05982	0.963897	0.940857	1.06251
6.02	0.984682	0.071658	1.00466	1.14794	1.06691	0.817702	1.06749	1.01579	0.924243	0.997707	0.849866	1.01242	1.0279	0.959758	1.0389	0.961677	1.05349	0.980912	0.924704	0.940798	1.00102	0.980731	0.989158	1.01307	0.903282	0.908063	1.04783	1.04306	0.890632	1.0014
6.16	0.991329	0.052234	0.993658	1.02329	1.04795	0.844364	1.04606	1.02792	1.04821	0.929541	0.937821	0.950675	1.00467	1.03623	1.02521	0.974138	0.956898	0.999723	0.962512	1.00371	0.906617	0.930622	1.0351	0.979279	1.01509	0.932843	1.03045	1.02123	1.02954	1.06388
6.3	0.985347	0.07268	1.04841	1.02985	1.06727	0.99279	1.1091	0.932962	1.01155	1.05542	0.976607	0.983548	0.932749	0.936194	0.980954	1.05168	1.0841	0.913675	0.933157	0.777743	1.02883	0.914007	0.877354	0.958278	0.957225	1.00283	0.973625	1.09071	0.939055	1.03004
6.44	0.9918	0.051948	1.01821	1.04796	1.02597	0.971349	0.907009	1.00607	0.898581	1.03313	0.925951	0.968397	0.957821	1.04585	1.06661	0.961219	0.960664	0.925794	0.990842	0.935369	1.0553	1.0396	0.982978	1.06309	1.02838	0.950724	1.00142	0.96022	0.956375	1.08552
6.58	0.999572	0.052954	1.04459	0.957471	1.05079	1.01707	1.03368	1.00777	1.04639	0.976283	0.98915	1.06378	0.934059	1.01575	1.02503	1.06969	1.003	0.983365	0.873496	0.920231	1.00514	1.0309	0.866376	1.01401	1.05031	1.04004	0.96466	1.02238	1.03102	0.951605
6.72	1.00922	0.054519	1.0438	1.04838	0.928383	0.999225	1.06143	0.99597	1.02123	0.98992	0.966297	1.02825	0.951776	1.01044	0.993881	0.947933	1.04128	1.12871	1.06994	0.865926	1.04153	0.97693	1.03044	1.00452	0.920134	1.05504	1.05277	0.989602	1.02877	1.0657
6.86	0.989203	0.074873	1.01715	0.983003	0.868494	0.976079	1.08331	0.96869	0.9773	1.0712	0.991213	1.05056	0.953333	1.04821	1.03311	1.02104	0.965716	0.925383	0.990139	0.744472	1.12444	1.09118	0.92034	0.964356	1.04375	0.986126	0.991975	0.934573	1.02877	0.94375
7	0.982552	0.060195	1.05599	0.920056	0.990087	0.916829	1.0759	0.992139	0.993966	1.01195	0.85325	0.848038	0.9423	1.03081	0.939842	1.02916	0.976181	0.918733	0.932424	0.99102	1.06021	1.07048	0.959166	0.953663	0.950906	1.04423	1.03419	1.00026	0.994305	1.02539
7.14	0.346888	0.091508	0.33977	0.35938	0.412842	0.230718	0.262032	0.257101	0.11668	0.328577	0.191994	0.21512	0.387265	0.37661	0.495736	0.375492	0.433105	0.30529	0.322517	0.454635	0.390994	0.363814	0.379285	0.438947	0.423022	0.437808	0.416962	0.403199	0.375584	0.218391
7.28	0.358128	0.111638	0.363204	0.280421	0.416495	0.290264	0.240758	0.339111	0.067007	0.292722	0.18539	0.374002	0.460621	0.39256	0.380397	0.404107	0.445918	0.304597	0.448464	0.356746	0.354727	0.363982	0.382571	0.527742	0.47069	0.388313	0.565326	0.461495	0.355794	0.114167
7.42	0.382237	0.113553	0.466775	0.350062	0.447963	0.425469	0.243345	0.328588	0.036551	0.322807	0.119615	0.368851	0.423742	0.399262	0.406353	0.49481	0.456382	0.424236	0.376869	0.421234	0.387438	0.43124	0.379316	0.476508	0.422408	0.462477	0.517403	0.462999	0.474333	0.175603
7.56	0.421708	0.089082	0.494453	0.353427	0.468182	0.391452	0.3901	0.389964	0.237897	0.437184	0.294665	0.313247	0.352805	0.410165	0.437074	0.494403	0.456142	0.365629	0.415483	0.419565	0.418164	0.494845	0.427635	0.431896	0.494258	0.414974	0.695386	0.538719	0.486128	0.283987
7.7	0.445563	0.100871	0.465286	0.519378	0.497471	0.500712	0.392181	0.384416	0.127448	0.39683	0.34123	0.536482	0.492918	0.414893	0.525245	0.520401	0.38408	0.381015	0.403558	0.418026	0.349855	0.464681	0.431755	0.58957	0.612685	0.504117	0.51011	0.523822	0.517848	0.269763
7.84	0.458299	0.112839	0.497629	0.448019	0.478887	0.438591	0.264801	0.347278	0.216047	0.453028	0.328051	0.363507	0.486278	0.457311	0.567255	0.50137	0.443424	0.488384	0.437358	0.511538	0.455922	0.598804	0.552509	0.572727	0.572033	0.523741	0.630061	0.576599	0.455382	0.165839
7.98	0.484386	0.112896	0.559604	0.416285	0.519652	0.422886	0.463254	0.325743	0.237516	0.478534	0.292068	0.437362	0.550731	0.48073	0.595202	0.56593	0.358876	0.449121	0.594007	0.406352	0.511731	0.527442	0.527338	0.603775	0.666561	0.53152	0.671808	0.582438	0.513752	0.272589
8.12	0.499594	0.105186	0.633079	0.422238	0.566273	0.43502	0.413805	0.486637	0.342123	0.410741	0.407925	0.47988	0.53865	0.462182	0.472614	0.636909	0.477502	0.478565	0.525675	0.437558	0.490913	0.635911	0.435817	0.562565	0.589526	0.615207	0.62068	0.584364	0.641605	0.184673
8.26	0.529645	0.085495	0.626642	0.537478	0.504248	0.586648	0.401804	0.482138	0.413791	0.475474	0.415852	0.464243	0.630708	0.505827	0.577418	0.534562	0.580524	0.551726	0.537648	0.53667	0.551301	0.640654	0.491858	0.567567	0.643917	0.578552	0.658888	0.564534	0.495322	0.274063
8.4	0.515959	0.100777	0.63201	0.470269	0.548692	0.426264	0.404089	0.511597	0.29689	0.470831	0.382751	0.504043	0.483676	0.454755	0.678626	0.66871	0.458483	0.53228	0.519402	0.437423	0.460409	0.514338	0.639091	0.604923	0.644402	0.555943	0.62051	0.571262	0.625191	0.330002
8.54	0.544811	0.098504	0.628483	0.539341	0.492922	0.52598	0.490933	0.54271	0.446976	0.547424	0.383061	0.555304	0.576991	0.490489	0.66933	0.615771	0.435793	0.461946	0.66177	0.609427	0.510124	0.567365	0.745626	0.628479	0.599119	0.48354	0.617205	0.634967	0.536636	0.256999
8.68	0.550427	0.093443	0.632765	0.504862	0.566748	0.546168	0.603872	0.462253	0.451121	0.495792	0.384985	0.447954	0.611631	0.422871	0.557024	0.671643	0.558138	0.443561	0.663257	0.477897	0.518135	0.612013	0.556396	0.587981	0.624502	0.620121	0.728485	0.717339	0.551646	0.392795
8.82	0.584521	0.113781	0.669491	0.559606	0.624316	0.450101	0.613302	0.464074	0.452664	0.587526	0.443734	0.550449	0.778874	0.52922	0.646817	0.792035	0.449316	0.492752	0.692383	0.489467	0.398582	0.686792	0.62429	0.653676	0.730836	0.552038	0.720277	0.662803	0.643551	0.407626
8.96	0.585544	0.093367	0.661775	0.619736	0.695774	0.553902	0.551096	0.553969	0.47064	0.554704	0.422109	0.429481	0.65433	0.587916	0.654262	0.758444	0.66595	0.574566	0.612355	0.534517	0.639766	0.47768	0.6533	0.619797	0.699101	0.58683	0.567006	0.668525	0.583203	0.344506
9.1	0.584342	0.092286	0.710465	0.570489	0.652414	0.548812	0.584547	0.47312	0.4182	0.585043	0.454802	0.545125	0.604903	0.534981	0.692555	0.693022	0.66664	0.538917	0.738325	0.512205	0.523566	0.581501	0.64362	0.689145	0.743141	0.612232	0.584496	0.531906	0.532563	0.394855
9.24	0.586316	0.119101	0.656509	0.581714	0.653549	0.497901	0.509359	0.47701	0.406809	0.590305	0.365844	0.460451	0.649545	0.544287	0.721747	0.577337	0.596632	0.594656	0.848386	0.414338	0.719779	0.584787	0.698312	0.708575	0.732143	0.615298	0.666321	0.665192	0.493425	0.386638
9.38	0.614583	0.113844	0.66271	0.612127	0.699884	0.558717	0.56738	0.587745	0.421016	0.562471	0.428504	0.554753	0.793161	0.526343	0.59751	0.736459	0.625541	0.618504	0.695555	0.399269	0.54597	0.565023	0.709867	0.768987	0.754632	0.565527	0.823844	0.708036	0.676183	0.442601
9.52	0.645042	0.089443	0.726027	0.586283	0.706887	0.641887	0.522969	0.624904	0.462104	0.676896	0.504921	0.559529	0.63306	0.572165	0.610468	0.730226	0.609691	0.67471	0.706231	0.678678	0.629034	0.683997	0.690145	0.772338	0.812737	0.751621	0.742484	0.663889	0.62911	0.458194
9.66	0.623634	0.11555	0.767245	0.630914	0.70438	0.479536	0.627637	0.5332	0.442654	0.61378	0.480175	0.595964	0.704541	0.510663	0.601919	0.839681	0.546377	0.617047	0.741228	0.657941	0.544465	0.642148	0.649551	0.679626	0.725832	0.571881	0.853505	0.725399	0.626374	0.348078
9.8	0.640399	0.092097	0.746653	0.619739	0.601717	0.484853	0.671314	0.526576	0.513959	0.738084	0.531675	0.619328	0.703693	0.54851	0.642543	0.84608	0.585597	0.617053	0.674638	0.617412	0.599043	0.74812	0.708195	0.716797	0.648122	0.610258	0.756658	0.727926	0.668466	0.458159
9.94	0.632999	0.114946	0.80556	0.692902	0.67955	0.542811	0.705737	0.48265	0.471182	0.673503	0.595033	0.584146	0.713417	0.625689	0.634819	0.83203	0.591066	0.635598	0.830555	0.59256	0.518145	0.654927	0.649646	0.611647	0.791946	0.619323	0.559649	0.652215	0.686049	0.291621
10.08	0.670363	0.136418	0.789161	0.570444	0.731385	0.643746	0.561491	0.599581	0.457291	0.653545	0.540302	0.539862	0.75861	0.64014	0.851357	0.810921	0.657865	0.637798	0.884032	0.587982	0.588196	0.765729	0.835514	0.713654	0.808874	0.690682	0.80117	0.704359	0.699072	0.247412
10.22	0.650999	0.102693	0.810346	0.583153	0.619645	0.60833	0.669775	0.550171	0.619218	0.670713	0.456212	0.575807	0.761498	0.58227	0.788758	0.637361	0.582833	0.62178	0.807843	0.605772	0.549444	0.76848	0.681932	0.792757	0.710778	0.680631	0.770059	0.695766	0.623928	0.402706
10.36	0.648655	0.103409	0.769154	0.638122	0.596905	0.598365	0.70858	0.634772	0.426441	0.681562	0.48167	0.631646	0.738269	0.543205	0.739675	0.754924	0.549257	0.55956	0.728288	0.629321	0.653668	0.745094	0.78929	0.734434	0.72496	0.610936	0.718214	0.753457	0.625163	0.397412
10.5	0.660758	0.125689	0.743574	0.651929	0.706802	0.481743	0.729029	0.559265	0.482016	0.717887	0.531903	0.55138	0.890308	0.637082	0.788218	0.750457	0.480409	0.626255	0.742988	0.670268	0.63094	0.843196	0.651741	0.751007	0.829117	0.576205	0.628454	0.816986	0.663245	0.368812
10.64	0.674109	0.099091	0.726461	0.606841	0.799282	0.673304	0.620215	0.700874	0.489829	0.72852	0.548375	0.650786	0.824784	0.560961	0.693285	0.836609	0.58455	0.544538	0.785456	0.611356	0.635381	0.756957	0.688246	0.78699	0.807408	0.728851	0.623716	0.707653	0.669731	0.484088
10.78	0.671614	0.109531	0.755723	0.63412	0.691209	0.545581	0.873625	0.702735	0.53604	0.706372	0.500692	0.676799	0.810345	0.611485	0.649048	0.775289	0.552645	0.580152	0.76617	0.5409	0.617523	0.768692	0.803849	0.717975	0.774363	0.688225	0.715274	0.696477	0.721638	0.392235
10.92	0.682013	0.123358	0.821822	0.56272	0.648156	0.481032	0.809138	0.727756	0.415661	0.707766	0.537217	0.695556	0.819971	0.606997	0.712011	0.750881	0.570668	0.602226	0.821057	0.604095	0.579412	0.783357	0.88057	0.801645	0.788388	0.624729	0.764486	0.655409	0.824016	0.499625
11.06	0.712166	0.118927	0.706974	0.627139	0.748135	0.565026	0.688006	0.690563	0.527816	0.558327	0.564088	0.772528	0.956476	0.598207	0.886721	0.769627	0.716614	0.695818	0.958679	0.724318	0.661114	0.736777	0.795508	0.70822	0.796912	0.718575	0.842216	0.777625	0.681936	0.466705
11.2	0.700287	0.094034	0.755619	0.768378	0.669091	0.693924	0.609964	0.701177	0.43617	0.775998	0.574657	0.732934	0.753026	0.628555	0.823442	0.870152	0.559189	0.700513	0.809017	0.585446	0.735588	0.72236	0.763364	0.77781	0.760351	0.698074	0.700256	0.714588	0.7178	0.570589
11.34	0.710156	0.09861	0.828574	0.631897	0.705361	0.764464	0.695577	0.642007	0.568505	0.770214	0.584108	0.713657	0.848478	0.593715	0.727227	0.754448	0.66265	0.631843	0.868513	0.537254	0.677351	0.758535	0.788097	0.775655	0.872814	0.755262	0.774776	0.813812	0.576272	0.563289
11.48	0.721366	0.115245	0.707986	0.752511	0.852649	0.592381	0.762721	0.740518	0.428097	0.678275	0.57952	0.715805	0.802094	0.60727	0.704136	0.949277	0.567459	0.697044	0.863144	0.65001	0.732043	0.81139	0.759963	0.821855	0.805733	0.750466	0.709631	0.811196	0.832986	0.512076
11.62	0.701751	0.109594	0.837428	0.654321	0.821558	0.710843	0.809244	0.597414	0.531025	0.704481	0.631124	0.761712	0.759148	0.599691	0.766711	0.790127	0.61145	0.725711	0.751457	0.550437	0.656265	0.887096	0.66935	0.819993	0.711376	0.743957	0.676944	0.717814	0.780448	0.371914
11.76	0.742023	0.104318	0.933107	0.634654	0.725372	0.615922	0.767869	0.724407	0.526554	0.74197	0.60832	0.793277	0.824496	0.668375	0.835162	0.885994	0.709411	0.783319	0.812368	0.646108	0.740916	0.727196	0.809264	0.848741	0.898001	0.707209	0.849888	0.670706	0.757038	0.531003
11.9	0.748698	0.099625	0.879828	0.722785	0.760242	0.737704	0.795606	0.618506	0.569925	0.683764	0.611277	0.693719	0.920116	0.677529	0.850928	0.822708	0.576771	0.787072	0.935702	0.586421	0.786175	0.80472	0.697591	0.820975	0.817102	0.751848	0.800327	0.790598	0.794459	0.669149
12.04	0.729432	0.126121	0.79804	0.685789	0.661854	0.7212	0.668961	0.806107	0.52738	0.689485	0.540165	0.907277	0.849631	0.563863	0.841819	0.810246	0.518068	0.719063	0.845753	0.539166	0.744922	0.941641	0.752118	0.83237	0.953217	0.725364	0.744861	0.780663	0.708703	0.546366
12.18	0.734854	0.092985	0.929213	0.712472	0.697866	0.686606	0.731483	0.683762	0.611958	0.703677	0.589624	0.799467	0.901564	0.631291	0.736019	0.8574	0.631829	0.684903	0.748923	0.700925	0.698506	0.801043	0.676838	0.800971	0.842885	0.747392	0.864765	0.849134	0.653657	0.601743
12.32	0.740357	0.098853	0.874285	0.754156	0.787434	0.70764	0.756426	0.78066	0.574108	0.644904	0.594978	0.780344	0.906666	0.569709	0.666675	0.822152	0.683923	0.68473	0.828473	0.83157	0.631336	0.850642	0.805581	0.777214	0.765829	0.743201	0.905185	0.741837	0.693531	0.566803
12.46	0.735223	0.138773	0.811452	0.76247	0.830649	0.600174	0.685704	0.554673	0.597807	0.861924	0.56633	0.712109	0.890301	0.628856	0.821239	0.882443	0.598363	0.632449	1.16936	0.619386	0.741834	0.862215	0.774209	0.822614	0.796614	0.684962	0.780436	0.709641	0.686726	0.501289
12.6	0.745597	0.107481	0.896912	0.652463	0.827811	0.650321	0.647038	0.655991	0.541382	0.752379	0.657751	0.76685	0.921372	0.647622	0.839166	0.934388	0.609496	0.813631	0.846142	0.669526	0.69117	0.742661	0.791681	0.807064	0.816979	0.662876	0.910493	0.824191	0.662312	0.637051
12.74	0.765726	0.110749	0.867778	0.780769	0.884092	0.722846	0.755509	0.760773	0.570482	0.771647	0.591715	0.840321	0.886825	0.594057	0.770588	0.995761	0.665471	0.801489	0.688403	0.706101	0.748088	0.984516	0.728301	0.740302	0.934313	0.698733	0.735682	0.843043	0.757039	0.615687
12.88	0.758222	0.111712	0.727425	0.761769	0.748217	0.761848	0.886684	0.693897	0.536456	0.741149	0.55672	0.809521	0.939544	0.631023	0.766487	0.909221	0.73032	0.768829	0.739103	0.645628	0.707504	0.845635	0.911628	0.781408	0.9496	0.778305	0.817932	0.86163	0.674468	0.548264
13.02	0.77162	0.119923	0.900693	0.665064	0.776683	0.564699	0.827445	0.664329	0.645697	0.683043	0.704225	0.828793	0.997852	0.598307	0.872698	1.02347	0.63445	0.721609	0.796793	0.642491	0.707025	0.930727	0.899215	0.831566	0.891347	0.850945	0.770289	0.730371	0.748756	0.696782
13.16	0.762713	0.08849	0.878797	0.664612	0.720606	0.809783	0.925596	0.788216	0.626416	0.782102	0.618105	0.849267	0.805662	0.659289	0.843593	0.929709	0.690665	0.723047	0.755874	0.68979	0.66337	0.761267	0.725534	0.794063	0.830572	0.795687	0.64823	0.883553	0.793826	0.698735
13.3	0.78734	0.111686	0.841477	0.688118	0.713576	0.653494	0.647998	0.75784	0.653997	0.747336	0.646451	0.831176	0.951272	0.6991	0.694068	1.12344	0.759387	0.755294	0.88265	0.740775	0.870951	0.828012	0.841836	0.73636	0.986821	0.76902	0.815485	0.892214	0.790855	0.72652
13.44	0.773211	0.103693	0.923294	0.804167	0.839323	0.660944	0.789302	0.683665	0.568942	0.748662	0.818813	0.742857	0.820547	0.678448	0.878268	0.918164	0.815099	0.735145	0.841638	0.688584	0.651574	0.813136	0.688856	0.770767	0.869422	0.69098	0.864542	1.01301	0.734874	0.596899
13.58	0.774622	0.0857	0.89282	0.739766	0.839064	0.635901	0.895719	0.811593	0.731962	0.769691	0.570698	0.723893	0.837822	0.68667	0.873209	0.862475	0.826286	0.731468	0.724925	0.695168	0.804293	0.862856	0.697362	0.836782	0.87431	0.731864	0.877481	0.745603	0.748364	0.661362
13.72	0.778384	0.115488	0.838177	0.766378	0.810733	0.697992	0.835353	0.803382	0.654396	0.776047	0.550104	0.824711	0.855245	0.681899	1.04832	0.929958	0.644948	0.819199	0.826676	0.60884	0.628782	0.899938	0.751258	0.928966	0.839327	0.718729	0.847334	0.885401	0.69539	0.627279
13.86	0.793386	0.086581	0.896018	0.718243	0.696686	0.710178	0.922151	0.728435	0.694615	0.881583	0.629085	0.782645	0.869952	0.731104	0.932196	0.88441	0.719634	0.792775	0.823309	0.742584	0.906603	0.899135	0.71394	0.865888	0.870772	0.722335	0.751362	0.850233	0.718597	0.760349
14	0.786822	0.109256	0.758179	0.867351	0.763059	0.655389	0.832269	0.773305	0.629687	0.698765	0.515353	0.799566	0.985803	0.698336	0.850357	0.781979	0.670271	0.806576	0.86205	0.729411	0.884198	0.853634	0.873427	0.79336	0.941272	0.824973	0.820244	0.956714	0.810611	0.594877
14.14	0.808003	0.100023	0.821269	0.697582	0.74188	0.697404	0.821191	0.809777	0.623602	0.846515	0.647594	0.852175	0.991055	0.650697	0.897432	0.899115	0.697365	0.71913	0.971071	0.698612	0.856983	0.939784	0.887504	0.872204	0.889484	0.85039	0.862252	0.809211	0.818321	0.754487
14.28	0.806929	0.104544	0.841363	0.804041	0.774065	0.691853	0.968612	0.76769	0.724601	0.781118	0.639279	0.869689	0.951996	0.709803	0.873641	0.958354	0.806338	0.792499	0.878168	0.683204	0.627869	0.866474	0.963707	0.906022	0.85309	0.738197	0.844149	0.895728	0.793843	0.588627
14.42	0.809387	0.109311	0.941304	0.7016	0.746775	0.690911	0.859537	0.752209	0.673586	0.828679	0.738252	0.831257	1.06227	0.598444	0.896086	0.765689	0.708934	0.810289	0.986568	0.76316	0.799999	0.905965	0.839472	0.951409	0.911587	0.87061	0.822992	0.824102	0.763697	0.617445
14.56	0.78394	0.117567	0.813663	0.745487	0.772214	0.502464	0.881833	0.793098	0.695728	0.76838	0.633155	0.732078	0.92102	0.701477	0.805028	0.939504	0.755147	0.677202	0.942566	0.664659	0.632952	0.9012	0.852921	0.960038	0.97873	0.768794	0.781307	0.924822	0.740305	0.664554
14.7	0.779161	0.09741	0.800703	0.709827	0.817597	0.536689	0.870383	0.816905	0.626343	0.803143	0.602718	0.743608	0.822471	0.679993	0.914876	0.832803	0.735141	0.856325	0.740013	0.65339	0.733024	0.929483	0.816657	0.904732	0.88494	0.829221	0.827399	0.777581	0.710548	0.839994
14.84	0.803436	0.111206	0.770672	0.822614	0.792901	0.588642	0.757541	0.765236	0.666298	0.774533	0.715017	0.766345	0.907874	0.703572	0.976216	0.900813	0.645181	0.789225	0.952326	0.783384	0.688505	0.873731	0.974501	0.902367	0.941585	0.752933	0.919539	0.929361	0.824613	0.610678
14.98	0.815957	0.123365	0.866854	0.877293	0.738871	0.686823	0.808624	0.788695	0.658246	0.720154	0.759843	0.896733	0.928772	0.704987	0.864237	1.07044	0.675681	0.77224	0.993921	0.723103	0.565948	0.86781	0.935541	0.908641	0.998685	0.771556	0.784521	1.02331	0.713987	0.741284
15.12	0.815783	0.101902	0.836589	0.855156	0.692904	0.780369	0.903497	0.724556	0.724737	0.715483	0.671122	0.743051	0.888807	0.655678	0.810583	1.03818	0.775874	0.804415	0.833875	0.765919	0.73313	0.828284	0.985789	0.852342	0.983791	0.839814	0.687028	0.973538	0.909713	0.827692
15.26	0.823673	0.113111	0.835755	0.852195	0.767956	0.686363	0.957513	0.934716	0.744671	0.885938	0.73286	0.848851	0.966211	0.649356	0.865307	0.876629	0.661542	0.773312	0.858033	0.584482	0.723001	1.05866	0.8643	0.89971	0.921785	0.665935	0.94987	0.898845	0.819383	0.779663
15.4	0.818803	0.11247	0.779554	0.78354	0.710815	0.649205	0.88103	0.789708	0.65506	0.75326	0.702589	0.785208	0.951621	0.691939	0.874629	0.939235	0.705331	0.877999	0.892857	0.839167	0.795824	1.13151	0.900733	0.793203	0.964668	0.845941	0.815065	0.941622	0.833104	0.642069
15.54	0.830839	0.105378	0.900535	0.753562	0.794741	0.79977	0.768893	0.831954	0.721326	0.986891	0.670829	0.813863	1.00399	0.724098	0.955033	1.08323	0.734294	0.832129	0.852367	0.65163	0.708999	0.916893	0.86945	0.847248	0.89897	0.83496	0.902505	0.88863	0.831096	0.685587
15.68	0.831213	0.144701	0.87639	0.779491	0.735643	0.677244	0.991466	0.875275	0.707292	0.939443	0.612755	0.823021	0.981717	0.727178	0.857928	0.950835	0.660365	0.896036	1.05487	0.525347	0.669024	1.13795	0.838826	0.882748	0.905501	0.866934	0.812107	0.975688	0.893399	0.619489
15.82	0.83254	0.121445	0.872811	0.666418	0.901696	0.694797	0.767273	0.86781	0.678924	0.929655	0.726239	0.827884	0.894554	0.780427	0.91555	0.802991	0.644345	0.875034	0.928889	0.611226	0.700861	1.01121	0.988232	0.90636	1.04008	0.653008	0.920708	0.980098	0.866171	0.857863
15.96	0.853087	0.119866	0.833368	0.97243	0.802201	0.729588	0.820279	0.904482	0.850294	0.956219	0.711939	0.829129	0.897822	0.709423	0.962347	0.998364	0.640668	0.882843	1.05649	0.629449	0.64839	0.885342	0.961097	0.853153	1.10693	0.858341	0.913655	0.80993	0.86238	0.799878
16.1	0.838909	0.113155	0.893125	0.833902	0.849539	0.567727	0.940145	0.910742	0.683972	0.918343	0.638421	0.876384	0.768857	0.713073	0.858467	1.00513	0.777057	0.83007	0.837447	0.703491	0.683296	0.995708	1.00372	0.979529	0.936528	0.829947	0.864866	0.843814	0.907686	0.838476
16.24	0.815728	0.105309	0.77838	0.785108	0.896182	0.734451	1.03342	0.792903	0.633221	0.791509	0.737697	0.856484	0.9639	0.728714	0.78977	1.02701	0.813294	0.819005	0.75808	0.722199	0.624629	0.906929	0.83108	0.818519	0.779824	0.708428	0.825017	1.03765	0.813587	0.833385
16.38	0.823445	0.10865	0.824877	0.686193	0.815728	0.717189	0.996628	0.859066	0.722437	0.87091	0.739934	0.734634	0.863927	0.826107	0.848737	0.862823	0.685494	0.693991	0.951014	0.715608	0.833423	1.00279	0.627772	0.829017	1.02086	0.858575	0.845042	1.04325	0.808308	0.772127
16.52	0.834901	0.083185	0.903182	0.82461	0.792534	0.747889	0.816442	0.847776	0.724963	0.881388	0.802893	0.874782	0.840004	0.758282	0.860297	0.924245	0.83533	0.923632	0.872981	0.729523	0.702751	0.928247	0.842504	0.936999	0.964194	0.812003	0.827771	0.916078	0.889475	0.59645
16.66	0.846761	0.082216	0.973795	0.765315	0.797417	0.834137	0.971906	0.996204	0.822618	0.85418	0.827505	0.821653	1.00305	0.747388	0.846428	0.868321	0.735988	0.801654	0.783133	0.665827	0.889456	0.859452	0.812816	0.803516	0.979006	0.838425	0.816573	0.933871	0.827392	0.832287
16.8	0.833966	0.091162	0.905763	0.77739	0.912167	0.773162	0.864972	0.942427	0.74539	0.910953	0.730519	0.762707	0.888019	0.752891	0.796042	0.948037	0.793997	0.768022	0.973422	0.611782	0.757161	0.894564	0.893181	0.848676	0.913685	0.925219	0.712299	0.96384	0.824996	0.759762
16.94	0.835777	0.088219	0.881825	0.764179	0.807578	0.824776	0.912002	0.856771	0.867265	0.834217	0.70001	0.803138	0.990945	0.728192	0.879722	0.979637	0.682978	0.752537	0.882895	0.727126	0.879306	0.950449	0.968253	0.833349	0.896917	0.835575	0.747188	0.870322	0.870286	0.674307
17.08	0.852547	0.110142	0.908666	0.752435	0.782798	0.648218	0.765852	0.807015	0.831246	0.92479	0.778228	0.923325	0.850966	0.77744	0.870599	0.981531	0.864663	0.765042	0.892611	0.941651	0.677744	0.986513	0.978251	0.810696	1.12699	0.82734	0.854052	1.0169	0.854776	0.67096
17.22	0.829709	0.099531	0.947488	0.756174	0.719403	0.680569	0.819569	0.859493	0.849305	0.855167	0.848522	0.833466	0.885835	0.7061	0.966623	0.791103	0.663452	0.70837	0.858161	0.669753	0.775623	0.906593	0.986668	1.00861	0.981387	0.853118	0.834512	0.916633	0.801382	0.748757
17.36	0.837496	0.087021	0.917124	0.779111	0.82583	0.678989	0.88891	0.944707	0.78988	0.9513	0.740886	0.800408	0.863829	0.704465	0.829543	0.843297	0.729693	0.865604	0.943045	0.714627	0.845094	1.0121	0.991888	0.881179	0.866341	0.797114	0.788501	0.900205	0.770678	0.785548
17.5	0.846065	0.092388	0.921613	0.73855	0.77988	0.761174	0.941267	0.901954	0.705237	0.851135	0.830856	0.851781	0.830528	0.721325	0.981736	0.843942	0.733289	0.816854	1.04381	0.729508	0.8091	1.01011	0.868305	0.878726	0.973143	0.817533	0.845022	0.949231	0.807731	0.7465
17.64	0.8514	0.106358	0.974563	0.940922	0.960893	0.748055	1.02006	0.797163	0.705269	0.784426	0.687025	0.875991	0.968093	0.713223	0.800042	0.80128	0.728473	0.840829	0.828476	0.698984	0.83097	0.898558	1.02414	0.866357	0.801084	0.93235	1.01097	0.998905	0.844648	0.757441
17.78	0.873709	0.085375	0.897624	0.778205	0.859616	0.821296	0.957731	0.884662	0.810447	0.843277	0.790117	0.834377	0.877524	0.810091	0.830519	1.0846	0.823036	0.871081	0.972208	0.690174	0.938991	0.925756	0.892003	0.957752	1.00595	0.915044	0.875784	0.978722	0.784072	0.753188
17.92	0.877549	0.084061	0.882789	0.758707	0.859198	0.809971	0.872457	0.817914	0.802216	0.889533	0.797804	1.03073	0.819439	0.782435	0.882058	0.884789	0.795099	0.836136	1.06578	0.788672	0.826123	1.0443	0.932132	0.91462	0.895717	0.88724	0.8962	1.03235	0.81807	0.948898
18.06	0.880217	0.06937	0.887429	0.825958	0.981174	0.826264	0.833444	0.945024	0.838133	0.850449	0.812369	0.948675	0.829542	0.85661	0.869189	0.843519	0.817339	0.82433	0.920988	0.77689	0.810203	0.916405	0.976084	0.918258	0.972299	0.879485	0.920999	1.0732	0.89541	0.79641
18.2	0.892489	0.125809	0.931499	0.800416	0.896815	0.831071	0.912219	0.819506	0.886567	0.931054	0.81085	0.660126	0.939025	0.802684	0.808274	1.0007	0.808416	0.875315	1.18329	0.57454	0.819725	1.10325	0.909422	0.9001	1.10979	0.954654	0.867729	1.03815	0.917436	0.897059
18.34	0.87263	0.100702	0.792718	0.90656	0.750332	0.707921	0.982367	0.894725	0.733694	0.943318	0.79178	0.861785	0.958361	0.782645	0.870708	0.935839	0.786345	0.832582	0.992132	0.676789	0.775398	1.0221	0.822255	0.927273	1.0481	0.988922	0.88617	0.994547	0.920375	0.847904
18.48	0.885868	0.101699	0.957352	0.78588	0.990878	0.741653	1.00137	0.800186	0.770461	0.813336	0.829338	0.842606	0.915997	0.821967	0.929686	0.846599	0.799645	0.758178	1.09326	0.740177	0.750627	1.07178	0.998437	0.893216	0.935589	0.954229	0.941342	1.00804	0.904857	0.907612
18.62	0.89073	0.086327	0.942881	0.887349	0.864023	0.771597	1.06431	0.881152	0.678911	0.901012	0.725892	0.906981	0.962262	0.788573	0.836584	0.988953	0.929728	0.94529	0.981028	0.752458	0.929899	0.893561	0.892232	0.895621	0.924673	0.90458	0.884017	1.01941	0.866284	0.92116
18.76	0.850546	0.085687	0.990745	0.88704	0.918617	0.756216	0.937375	0.663197	0.802262	0.856872	0.80776	0.915783	0.923719	0.725164	0.912807	0.956946	0.749204	0.907225	0.87622	0.792227	0.872097	0.972314	0.84844	0.801191	0.882869	0.797178	0.850815	0.939564	0.773753	0.697695
18.9	0.860629	0.097998	0.929655	0.841846	0.874346	0.835282	0.966094	0.831479	0.62377	0.831084	0.828446	0.799532	0.995166	0.739372	0.90462	0.896955	0.67541	0.787533	0.883759	0.74828	0.818189	1.04074	0.96214	0.847965	0.859171	0.84928	0.964753	0.985005	0.793929	0.983805
19.04	0.908386	0.101998	1.0317	0.909234	0.997702	0.976434	1.04585	0.815391	0.873559	0.825966	0.717736	0.920843	1.10342	0.728781	0.861382	0.925218	0.882913	0.849526	0.993123	0.703904	0.89249	1.02422	1.00435	0.866937	0.92253	0.890855	0.943944	1.0144	0.933942	0.778471
19.18	0.889653	0.100596	1.00701	0.916084	0.871682	0.758489	1.01418	0.782075	0.695702	0.864506	0.885338	0.927907	0.982164	0.780928	0.828382	1.0289	0.76787	0.885751	0.903656	0.670037	1.00611	0.90237	0.907673	0.925135	1.06461	0.83163	0.838979	0.972258	0.982332	0.908519
19.32	0.893238	0.082245	0.970806	0.814981	0.853046	0.908983	0.880098	0.760317	0.914665	0.922283	0.814767	0.902521	0.913899	0.853966	0.810815	0.98843	0.825454	0.76869	1.00588	0.764441	0.949006	1.07891	0.968722	0.924423	0.970029	0.834163	0.929484	1.01165	0.822828	0.84739
19.46	0.879232	0.077577	0.987155	0.795271	0.955132	0.717748	0.818765	0.773565	0.842373	0.908058	0.791057	0.930644	0.963879	0.857786	0.929776	0.913859	0.770404	0.836188	0.949457	0.764726	0.94649	0.972569	0.880247	0.914117	0.962583	0.889881	0.816076	0.994037	0.833068	0.903593
19.6	0.894611	0.107208	0.975756	0.850691	0.862936	0.75203	1.15356	0.721355	0.810223	0.964994	0.813289	0.838482	0.951889	0.850531	1.00775	0.837805	0.805228	0.882544	0.835399	0.73823	0.922482	1.09444	1.03325	0.800595	1.07723	0.872709	0.909286	0.922271	0.894882	0.869284
19.74	0.887031	0.084033	0.863963	0.830867	0.790872	0.892426	0.974103	0.870003	0.93123	0.930713	0.797644	0.957632	0.957453	0.770621	0.803319	1.00646	0.819822	0.942745	0.809601	0.716255	0.878621	0.901926	0.949524	0.853542	1.05634	0.797794	0.976585	1.0248	0.848715	0.883301
19.88	0.865002	0.094875	0.806539	0.73496	0.842526	0.774817	1.05123	0.910752	0.836821	0.982361	0.766092	0.771974	0.925755	0.78684	0.958836	0.913826	0.781681	0.948494	0.907944	0.716475	0.908345	0.93629	0.810002	0.897611	1.07146	0.815147	0.813508	0.912501	0.718343	0.918908
20.02	0.894168	0.113302	0.919584	0.970889	0.826864	0.726034	1.02298	0.795133	0.880363	0.864125	0.755375	0.873773	0.972933	0.832387	0.999908	1.03214	0.782038	0.733595	1.05219	0.719911	0.937397	1.13896	0.956497	0.921157	0.996495	0.782721	0.851524	1.04993	0.815466	0.826346
20.16	0.911024	0.098689	0.86317	0.906604	0.96364	0.839733	0.88815	0.800217	0.755692	1.06323	0.784269	0.923375	1.00541	0.911149	0.918329	1.04851	0.75976	0.918219	1.12119	0.824351	0.851605	1.04747	0.864171	0.942772	1.07233	0.947801	0.950578	0.902863	0.848565	0.785501
20.3	0.903033	0.114443	0.966757	0.866197	0.852407	0.588376	0.908573	0.847525	0.90627	0.994957	1.01201	0.927108	0.896844	0.77252	0.873346	1.12639	0.765636	0.898529	1.14554	0.764114	0.832286	0.907785	0.915526	0.856107	1.07969	0.850468	0.86173	1.01995	0.932418	0.915876
20.44	0.89336	0.097357	0.974869	0.910532	0.883318	0.75093	0.959147	0.811634	0.842462	1.01586	0.763696	0.945101	0.834918	0.743535	0.915423	0.889578	0.805772	0.843949	1.01772	0.731775	0.803552	1.06546	0.908822	0.911168	0.955846	1.02015	0.885564	1.0747	0.946942	0.801668
20.58	0.891632	0.109526	0.978289	0.92779	0.831642	0.818527	0.979726	0.744355	0.780532	0.863868	0.760168	0.851983	0.917286	0.828104	0.837566	0.948093	0.720135	0.969847	1.17954	0.802783	0.766469	0.906617	1.03435	0.95425	0.834216	0.920551	0.911676	1.13231	0.93139	0.833618
20.72	0.907341	0.07586	0.974517	0.854466	0.96054	0.844254	0.963369	0.850402	0.917009	0.925865	0.90068	0.956025	0.94285	0.883498	1.02118	0.95212	0.734553	0.897178	0.844637	0.799254	0.850664	0.903558	1.10732	0.980462	0.962276	0.888984	0.874357	0.964477	0.82443	0.826632
20.86	0.901534	0.085507	0.923763	0.926892	0.917401	0.896055	1.03053	0.846202	0.779549	0.81164	0.837485	0.989509	0.923559	0.814768	0.839262	1.08962	0.724122	0.846523	1.03903	0.793761	0.908515	0.953501	0.969016	0.925672	0.913081	0.89198	0.876479	1.02708	0.913824	0.834138
21	0.900158	0.095778	0.910367	0.819047	0.994363	0.689402	1.02358	0.876672	0.93777	0.853983	0.861158	0.874449	0.965643	0.863048	1.07862	0.981452	0.711236	0.899923	1.01195	0.732163	0.753166	1.00452	0.938559	0.967861	0.950816	0.859274	0.930438	0.939663	0.893883	0.881426
21.14	0.87348	0.072866	0.830064	0.91814	0.986046	0.925874	0.949572	0.788388	0.748764	0.920174	0.858708	0.827872	0.837066	0.840737	0.875513	1.01871	0.789824	0.918334	1.02103	0.789409	0.809161	0.880398	0.824834	0.877237	0.903657	0.934278	0.762193	0.89117	0.812022	0.918261
21.28	0.9183	0.099674	0.909837	0.835513	1.04046	0.73428	0.934378	0.827549	0.9414	0.911003	0.854748	0.941984	1.07682	0.904749	1.06489	0.924225	0.994593	0.929669	1.01345	0.666523	0.786257	0.942434	1.01495	1.06022	0.887414	0.830902	0.985109	0.93263	0.811116	0.955282
21.42	0.903882	0.093694	0.900218	0.779375	0.977979	0.798829	0.96233	0.936285	0.94674	0.990508	0.945468	0.813766	0.983951	0.794489	1.04727	1.06332	0.773817	0.880772	0.919685	0.738402	0.926389	0.886501	0.883731	0.905142	0.977173	1.07309	0.905025	0.899387	0.713333	0.885716
21.56	0.885527	0.079844	0.862438	0.731049	0.829916	0.821415	0.860064	0.818432	0.975415	0.864427	0.827149	0.771525	0.951906	0.84723	1.01473	1.04204	0.806001	0.930658	1.00439	0.806556	0.81088	0.911035	0.896963	0.850058	0.96485	0.945901	0.959769	0.98293	0.858959	0.848069
21.7	0.926528	0.096995	0.844916	0.888829	0.952249	0.788496	1.10326	0.849725	0.863591	0.964343	0.900896	0.840175	1.01447	0.853947	1.03362	1.08848	0.772982	0.978758	1.01582	0.771356	0.907859	0.932593	0.98792	0.935037	0.974521	0.786603	0.950591	1.12449	0.910811	0.906435
21.84	0.912162	0.103349	1.04811	0.734495	0.836998	0.821983	0.947904	0.822519	0.809436	0.974433	0.984261	0.766987	0.92795	0.811342	1.05313	1.1205	0.988226	0.988758	1.01186	0.812259	0.786097	0.88527	0.941392	0.838934	0.965594	0.81555	0.952202	1.06814	0.977596	0.848601
21.98	0.897423	0.07836	0.901817	0.895455	0.864681	0.745817	1.01279	0.989764	0.948411	0.890157	0.897052	0.754957	0.93995	0.777108	0.974401	0.928037	0.848769	0.921648	0.992265	0.80163	0.968267	0.945397	0.931569	0.921032	0.95967	0.926081	0.808914	0.994406	0.783003	0.804799
22.12	0.877937	0.081011	0.874062	0.997888	0.860027	0.753622	0.871589	0.783299	0.873455	0.856473	0.844245	0.853776	0.917177	0.794993	1.01176	0.958732	0.782967	0.895644	0.975969	0.741869	0.841931	0.884568	0.993922	0.869877	1.07734	0.842591	0.857214	0.90667	0.786477	0.874085
22.26	0.898034	0.121591	0.964748	1.05642	0.814801	0.639796	0.928769	0.746228	0.973164	0.902854	0.850901	0.836025	0.933327	0.729966	0.903809	0.942066	0.863431	0.87782	1.01663	0.681377	0.829546	1.01407	1.11747	0.877514	1.17335	0.949423	0.86842	0.998523	0.833016	0.821491
22.4	0.872297	0.07653	0.828933	1.01962	0.834449	0.678452	0.919269	0.709534	0.980055	0.932242	0.887844	0.936179	0.880499	0.847335	0.859454	0.898306	0.79482	0.917884	0.864185	0.785497	0.80488	0.887917	1.00378	0.89154	0.849373	0.916013	0.887449	0.867196	0.920602	0.821017
22.54	0.864911	0.08443	0.83894	0.870429	0.665839	0.779598	0.855866	0.749657	0.930707	0.849949	0.899159	0.877702	0.910591	0.809773	0.824325	1.00828	0.715018	0.951291	0.909539	0.866106	0.800873	0.86774	0.924077	0.818287	0.999881	0.819593	0.835441	1.04731	0.906984	0.884564
22.68	0.886235	0.075495	0.899154	0.8902	0.781813	0.785228	0.995643	0.910962	0.936038	0.832345	0.810189	0.90117	0.806851	0.885255	0.979367	0.92992	0.773556	0.884995	1.02839	0.852824	0.953258	0.824299	0.820332	0.875903	0.988742	0.806601	0.815017	0.905466	0.905583	1.03548
22.82	0.907846	0.080914	0.912415	0.832709	0.818166	0.757582	0.893457	0.918616	0.926743	0.95243	0.921129	1.06201	0.905647	0.832834	1.06011	0.930413	0.927803	0.893766	1.01876	0.835094	0.777598	0.945829	0.795402	0.931637	1.07595	0.857518	0.938373	0.896271	0.863439	0.93798
22.96	0.905965	0.087554	0.947705	0.925718	0.81744	0.800114	0.912783	0.83055	1.08257	0.928239	0.871814	0.877388	0.816139	0.722605	0.99823	1.03824	0.819518	0.894309	1.10884	0.842039	0.88266	0.917475	0.954511	0.869625	0.976267	0.838302	0.894882	0.970413	0.975771	0.85287
23.1	0.903092	0.101944	1.06103	0.852192	0.841107	0.868912	1.0875	0.812301	0.77807	0.91323	0.775206	0.988331	0.884256	0.839928	0.968459	1.03769	0.713124	0.740402	0.872863	0.931363	0.849155	0.939214	0.970452	0.910077	1.10899	0.963563	0.868271	0.989392	0.796124	0.92538
23.24	0.899391	0.094019	0.994492	0.784484	0.859952	0.916353	1.10628	0.930579	0.863495	0.84298	0.842604	0.97246	0.883155	0.795788	1.01375	1.00735	0.805254	0.86995	1.0411	0.752055	0.748958	0.884615	0.925505	0.903967	1.06124	0.795461	0.920078	0.964344	0.840825	0.855866
23.38	0.910203	0.078938	0.945925	0.911526	0.866482	0.927987	0.940826	0.866939	0.846421	0.877771	0.973419	0.972167	1.04601	0.820647	0.972985	1.09616	0.76647	0.955759	1.02822	0.856759	0.824469	0.75005	0.894626	0.874733	0.908783	0.853333	0.880848	0.985422	0.920857	0.920082
23.52	0.894057	0.08257	0.962467	0.759793	0.875847	0.766119	0.993429	0.920399	0.9398	0.882733	0.737303	0.972832	0.909094	0.780401	0.945711	0.964744	0.827772	0.899628	0.980177	0.860168	0.902957	0.871361	0.967855	0.961352	1.10376	0.815885	0.828953	0.873478	0.87657	0.85301
23.66	0.888292	0.098332	0.93624	0.892597	0.900113	0.684919	1.05411	0.878233	0.97047	0.903187	0.833365	0.792317	0.900159	0.830872	0.850027	0.948213	0.725341	0.868867	1.18941	0.840087	0.862433	0.860798	0.872767	0.858114	0.991936	0.80087	0.88278	1.0264	0.848129	0.869422
23.8	0.893646	0.097841	0.887597	0.946532	0.838669	0.831331	1.2078	0.830946	0.766082	0.95368	0.721066	0.967798	0.963697	0.86832	0.927829	0.950189	0.820578	0.80251	0.792569	0.845889	0.889797	1.02965	0.879994	0.899723	0.966893	0.858485	0.840818	1.02218	0.916453	0.795028
23.94	0.882178	0.099055	0.92791	0.930558	0.759157	0.761085	0.961993	0.699028	0.839845	0.995039	0.770966	0.856858	1.01203	0.871726	0.94427	1.14772	0.791375	0.855959	0.850866	0.851524	0.853084	0.885673	0.932346	0.8717	1.02199	0.779892	0.834906	1.02483	0.84815	0.820482
24.08	0.880527	0.091783	0.942268	0.914696	0.79922	0.782462	1.01047	0.846603	0.743809	0.954933	0.726608	0.932966	0.948736	0.815575	0.894367	0.969574	0.816681	0.856445	1.04864	0.856669	0.938515	0.764813	0.82037	0.961585	1.04021	0.873093	0.790841	0.966897	0.894507	0.743189
24.22	0.90032	0.094583	1.03555	0.930735	0.938787	0.608262	0.826023	0.890178	0.814495	0.898195	0.882511	0.95147	0.903962	0.915612	0.837999	0.983233	0.762452	0.874136	1.01202	0.86435	0.766165	0.971071	0.915251	0.95798	1.06274	0.830884	0.993933	0.95859	0.861137	0.96124
24.36	0.897133	0.08679	0.934699	0.824869	0.914549	0.745295	0.968132	0.796247	0.761302	0.980249	0.879735	0.859965	0.964351	0.782353	0.855558	0.877691	0.842206	0.869511	1.01017	0.814654	0.917652	1.05106	0.951873	0.949575	1.06783	0.827173	0.914517	1.03922	0.87928	0.840003
24.5	0.906316	0.112144	1.06161	0.890595	0.840845	0.751661	1.06886	0.805591	0.93073	0.794021	0.65794	0.992903	0.87447	0.866611	0.901543	1.08978	0.971339	0.858371	0.877768	0.92798	0.755994	1.0755	0.904354	0.838015	1.05306	0.816947	0.881517	0.976228	0.837908	1.07471
24.64	0.910584	0.101243	0.896433	0.947797	0.810923	0.834519	1.25313	0.820106	0.935192	0.878247	0.908107	0.929117	1.01732	0.870946	0.809932	0.932856	0.803425	0.889242	0.953066	0.727939	0.863122	1.08901	1.00173	0.957085	0.941072	0.842425	0.820516	0.914618	0.888182	0.9603
24.78	0.893265	0.086504	0.898805	0.914506	0.860918	0.809838	1.10484	0.882745	0.877256	0.888732	0.924244	0.89701	0.928853	0.848503	0.740733	0.953975	0.876884	0.892495	0.937192	0.760187	0.702262	0.990881	0.875673	0.853704	1.03076	0.914692	1.0519	0.831266	0.900661	0.861905
24.92	0.892216	0.101811	0.986785	0.921965	0.926455	0.717576	0.93356	0.862249	0.822176	0.86222	0.942262	0.90561	0.968631	0.769989	0.963548	1.0511	0.826618	0.798297	1.0998	0.75914	0.750579	0.982795	0.816532	0.874983	1.02486	0.814685	0.802085	0.824006	1.06948	0.904066
25.06	0.900901	0.079084	0.934399	0.923702	0.826264	0.835407	0.995412	0.857875	0.841266	0.921344	0.876253	0.879637	0.951747	0.848446	0.990129	0.992383	0.787279	0.90788	1.01283	0.774225	0.754539	0.974513	0.920314	0.947892	0.835181	0.904604	1.0009	0.988063	0.759023	0.983737
25.2	0.893806	0.100395	0.972993	0.897756	0.784622	0.847762	0.982667	0.787041	0.755349	0.971226	0.889674	0.968633	0.886185	0.768498	0.913398	0.956213	0.801029	0.808268	1.08077	0.771782	0.774932	1.02503	0.971199	0.859763	1.13826	0.929755	0.797057	0.955949	0.893114	0.837651
25.34	0.888737	0.083602	0.904716	0.816381	0.917424	0.706161	1.03538	0.856235	0.809115	0.876359	0.928053	0.840023	0.942177	0.821486	0.923106	0.858409	0.813332	0.884568	1.06315	0.809325	0.867275	0.894177	0.846968	0.963148	1.07853	0.828358	0.843982	1.00617	0.892556	0.858086
25.48	0.90341	0.084767	0.872597	0.820364	1.02338	0.748012	1.12683	0.973294	0.808403	0.957984	0.851554	0.9106	0.82352	0.803242	0.863612	0.905031	0.835281	0.908519	0.853104	0.858689	0.856026	1.05248	0.892954	0.893289	1.02771	0.889926	0.92815	0.972602	0.870872	0.967444
25.62	0.909395	0.083102	0.983513	0.861334	0.813447	0.839113	1.07233	0.849437	0.775709	0.979575	0.852924	0.984003	1.01356	0.860651	0.850425	0.917472	0.960253	0.896334	0.823588	0.869968	0.884655	1.10199	0.800358	0.951072	1.03278	0.852096	0.958052	0.881743	0.922443	0.874249
25.76	0.915506	0.093058	0.999311	0.917497	0.863008	0.966221	0.943543	0.907274	0.861989	0.859212	0.889582	0.861726	0.973365	0.78425	0.885818	0.934456	0.881473	0.960543	1.24668	0.77115	0.956387	0.908948	0.820375	0.903827	1.06811	0.801538	0.882005	0.923545	0.988769	0.873559
25.9	0.914071	0.084884	0.910909	0.924819	0.914309	0.784852	0.928617	0.871382	0.827573	1.06343	0.914803	0.821784	0.951712	0.949574	0.805843	0.88012	0.878614	0.914691	0.99678	0.768173	0.816622	1.04641	0.951141	1.06859	1.03736	0.890859	0.910445	0.982049	0.794362	0.98817
26.04	0.92822	0.082145	1.06401	0.78451	0.992048	0.858656	0.92669	1.01556	0.820436	0.984166	0.880329	0.916928	0.925065	0.865352	0.917319	0.947927	0.92087	0.876118	1.18339	0.87708	0.967339	0.915908	0.94962	1.00061	0.895846	0.814922	0.825786	0.942615	0.974169	0.946896
26.18	0.914639	0.087455	1.06492	0.903189	0.854692	0.820933	0.904469	0.916415	0.907759	0.992723	0.877616	0.902592	1.06425	0.878587	0.817076	0.883294	0.814019	0.909752	1.07952	0.845725	0.91417	0.859234	1.01786	0.96442	0.997319	0.879313	0.710879	1.0473	0.928709	0.853163
26.32	0.920766	0.100633	1.02883	0.82254	1.00025	0.777634	0.866403	0.899081	0.846701	1.06255	0.934549	0.833763	0.996632	0.918707	0.945763	0.99433	0.78258	0.827852	1.15446	0.726591	0.809158	0.918318	1.03417	0.908	0.945929	0.976503	0.880015	0.898299	1.07957	0.912272
26.46	0.913924	0.098374	1.03773	0.878267	0.965699	0.760733	0.782367	0.89038	0.853348	0.919662	0.905465	0.8126	0.999344	0.838424	0.874653	0.998888	0.914188	0.904649	1.04629	0.756834	0.760673	0.967008	1.0265	1.11691	1.00475	0.928714	0.850263	1.07047	0.869898	0.855155
26.6	0.933751	0.10523	0.887924	1.07078	0.909214	0.893351	0.996709	0.912486	0.842835	1.06639	0.845343	0.923708	0.943171	0.909686	0.832128	0.962014	0.897153	0.748375	1.17915	0.702691	0.844933	1.00421	1.01783	1.03044	1.04951	0.9614	0.80934	1.05519	0.961587	0.887503
26.74	0.928318	0.060987	0.922499	0.979987	0.944755	0.909136	0.986202	0.889945	0.924653	0.928818	0.990902	0.940939	0.935034	0.902701	0.84244	0.950524	0.962733	0.922755	0.961598	0.741853	0.88938	1.02708	1.00298	0.935913	0.977515	0.816244	0.969419	0.909289	0.849966	0.977661
26.88	0.931727	0.083611	0.889854	0.942109	0.921404	0.840053	0.948128	0.87803	0.992688	1.02637	1.05626	1.02146	0.858347	0.873234	0.985319	0.960818	0.898623	0.760694	1.03887	0.753083	0.902331	0.929893	1.02027	0.884551	1.03351	0.834231	0.948482	0.996325	1.03899	0.854448
27.02	0.939346	0.086378	0.96022	0.879257	0.964207	0.900824	1.08646	0.954037	1.01118	1.10064	0.920982	1.04362	0.921508	0.807749	0.841446	1.00444	0.939415	0.866818	0.981393	0.799439	0.846073	0.847581	0.953518	0.922596	0.967433	0.810254	0.976204	1.09777	1.02355	0.873062
27.16	0.903014	0.112127	0.972165	0.859536	0.976027	0.692628	0.957806	0.950969	0.966054	0.863075	0.865492	0.991918	0.843398	0.824342	0.873058	1.09982	0.806828	0.962278	0.927548	0.734913	0.65816	0.902656	1.12091	0.926266	0.866336	0.806623	0.792287	1.05676	0.9687	1.01785
27.3	0.900849	0.105584	0.897943	0.854	0.881628	0.742952	0.901592	1.04408	0.934302	0.939757	0.891778	1.10084	0.878681	0.80618	0.870421	1.03734	0.87707	0.804107	0.82708	0.648298	0.840417	1.11623	0.978066	0.992052	0.957876	0.750464	0.844341	0.932522	0.886273	0.987501
27.44	0.908044	0.087419	0.929869	0.806448	0.884544	0.92376	0.953863	0.897721	0.873361	0.947109	0.855204	0.865777	0.886404	0.865318	1.01258	0.882736	0.838996	0.941673	1.09187	0.661868	0.793395	0.921133	0.910626	0.973194	1.08454	0.818669	1.01791	0.903519	0.93819	0.944952
27.58	0.912431	0.102084	0.944672	0.898204	0.991736	0.604919	1.006	0.779783	0.879624	1.01207	0.886023	0.920653	0.916503	0.815	0.89313	1.14077	0.927772	0.910074	1.11113	0.813886	0.912245	0.829088	0.880716	0.94091	0.974052	0.872996	0.927824	0.983644	0.954469	0.820173
27.72	0.927855	0.099288	0.86624	0.935147	1.08637	0.769539	0.975693	0.878067	0.871647	0.959587	0.725533	1.00981	0.919004	0.825603	0.974375	1.05438	0.836977	1.00082	1.09538	0.757035	0.810073	1.05783	0.864401	0.957736	0.974256	0.957414	0.941543	1.05316	0.890522	0.931802
27.86	0.924885	0.089467	0.886832	0.861404	0.886186	0.808589	0.898066	0.89791	0.900806	0.880815	0.985767	0.934246	0.953804	0.869473	0.929163	1.11832	1.01427	0.8958	1.15843	0.853029	0.914103	0.870747	0.908805	1.06472	1.06962	0.89956	0.764779	0.934896	0.894637	0.842004
28	0.936076	0.085153	0.91525	0.938113	0.930329	0.835009	0.985446	0.814056	0.926991	0.875381	0.820043	0.977145	1.00566	0.904228	0.966278	1.09455	0.931468	0.965422	1.12891	0.78818	0.871994	0.881538	0.955178	0.926171	1.11778	0.901813	0.856703	1.01876	0.971543	0.906173
28.14	0.92804	0.085537	1.01916	0.848328	0.910136	0.758251	0.846931	0.867477	0.942957	0.99105	0.998675	0.901923	0.986105	0.900967	0.822003	0.99507	0.91801	0.896275	0.998687	0.7412	0.955431	0.854944	0.977411	1.04487	1.08577	0.917209	0.918702	1.03981	1.00448	0.843291
28.28	0.936317	0.075936	0.88923	0.903704	0.938453	0.913397	1.02164	0.855716	1.0003	1.04163	0.921887	1.00555	1.05421	0.848973	0.846292	0.979534	0.972888	0.815522	0.996368	0.873161	1.01171	0.913383	1.03463	0.970222	0.868771	0.813881	0.862961	1.0695	0.901866	0.891499
28.42	0.931818	0.083472	0.943073	0.767756	0.967968	0.832857	0.963633	0.843101	0.944118	1.00233	1.02656	0.920859	0.893533	0.90872	0.8266	1.02354	0.813317	0.802313	1.06569	0.919911	0.959589	1.02433	1.06689	0.959677	0.883025	0.825849	0.938387	1.0437	0.951736	0.971821
28.56	0.956202	0.104384	0.917337	0.896999	0.948831	0.830664	0.792175	0.961755	0.994055	0.944994	0.891706	0.983326	0.913666	0.868215	0.895146	1.09025	0.848516	0.817167	1.01065	0.7804	1.01277	1.0799	1.16315	1.06846	1.03819	0.892775	0.92772	1.17098	0.967259	1.0666
28.7	0.926547	0.087471	0.979659	0.9086	1.01473	0.841371	0.885608	0.844288	0.967913	0.978607	0.972139	0.889557	0.86574	0.803888	0.922054	1.08663	0.918702	0.842118	0.983609	0.739622	1.04106	0.929735	0.977929	0.97238	1.00747	0.785325	0.882555	0.919269	1.1088	0.87398
28.84	0.928201	0.09802	0.892005	0.934042	0.95922	0.845606	0.846548	0.839613	0.91117	0.914707	0.768937	0.998336	0.934126	0.820619	0.802953	1.23083	0.869912	0.887655	1.10266	0.899578	0.864103	1.01877	0.94168	1.03967	1.00252	0.873811	0.877296	1.03758	0.908728	0.966957
28.98	0.944062	0.110281	1.01955	1.00733	0.917656	0.81999	0.963785	0.949275	0.87901	0.980501	0.992303	0.799948	0.912384	0.829871	0.949751	1.09781	0.890466	0.874461	1.22659	0.860113	0.824338	1.07268	0.985119	1.07589	1.00153	0.77808	0.917681	1.12611	0.89189	0.789616
29.12	0.942048	0.074435	0.955655	1.04912	1.00313	0.789022	0.878697	0.937741	0.950531	0.93073	0.898401	0.979587	0.889521	0.82994	0.9126	1.04747	1.07219	0.924958	0.98108	0.825368	0.949107	0.920698	1.08707	0.955605	0.972989	0.848969	0.879809	1.01483	0.985207	0.907332
29.26	0.917502	0.078758	0.984455	0.885156	0.9991	0.843447	0.874321	0.881446	0.91661	1.0133	1.00257	0.938519	0.959758	0.885387	0.983411	1.14798	0.855865	0.856438	0.897242	0.833016	0.843413	0.879102	0.897554	0.90184	0.919496	0.849978	0.825935	1.06479	0.809545	0.940392
29.4	0.924805	0.078368	0.929502	0.886757	0.996765	0.783584	0.861364	0.962251	0.903179	0.976859	0.998584	0.94341	0.827218	0.903138	0.782684	0.934062	0.869662	0.873874	0.925996	0.820347	0.958382	0.963252	1.11851	0.960525	1.08271	0.892994	0.864923	1.00684	0.923767	0.943386
29.54	0.938638	0.056975	1.03118	0.900884	0.947535	0.90238	0.922395	1.03649	0.895693	0.970357	0.899104	0.927268	0.919524	0.917502	0.9277	0.869432	0.83296	0.968453	0.872043	0.913476	0.910763	0.895225	0.966915	0.993613	1.10378	0.957355	0.975527	0.968967	0.962379	0.892961
29.68	0.941402	0.093057	1.00133	0.897459	1.01887	0.763732	0.840064	0.932803	0.8971	0.942194	0.936171	1.02136	1.0015	0.817814	0.894058	1.05752	0.794726	1.03532	1.02475	0.726582	0.962966	0.939268	0.95889	1.06353	1.103	0.859973	0.99945	0.983318	0.92882	0.95669
29.82	0.950796	0.095431	1.06699	0.953351	0.944709	0.836344	0.886457	0.819514	0.913622	0.961461	0.910482	1.00442	0.84938	0.936528	0.963432	1.07502	0.912815	0.938601	1.07521	0.812192	0.911699	0.986541	1.16379	0.968961	1.14157	0.784148	0.894822	1.05394	0.960153	0.896129
29.96	0.930114	0.077068	0.870474	0.885093	0.928793	0.788097	1.06456	0.905685	0.838836	1.00798	0.858011	0.995459	0.924717	0.86471	0.960651	0.940487	0.915562	0.929528	0.887792	0.808788	0.965208	0.926557	0.997566	0.965979	1.0345	0.842444	0.90522	1.13621	0.965439	0.928859
30.1	0.949251	0.083408	0.938964	0.909334	1.03676	0.70271	0.908197	0.91534	1.01718	1.00311	0.854287	0.951848	1.01707	0.93386	0.928234	0.862671	1.14114	1.04314	0.941892	0.893357	1.04632	0.892368	0.972077	1.00731	0.961525	0.844276	0.898348	0.985607	0.951477	1.02062
30.24	0.936021	0.080776	1.00037	0.917391	1.03916	0.943081	0.82482	1.09287	0.949319	0.916828	0.929381	0.924195	0.867635	0.985282	1.00458	1.06024	0.918729	0.879135	0.947965	0.734348	0.887217	1.09925	0.911196	0.842045	0.919751	0.869805	0.935739	0.902638	1.01159	0.894028
30.38	0.923467	0.095639	1.01319	0.999842	0.896357	0.873724	0.972104	0.877466	1.03443	0.915468	0.866955	0.834967	0.87923	0.831282	0.990726	0.943698	0.812354	0.757135	1.08542	0.691584	0.857144	1.11111	0.951957	0.916406	0.871488	0.890393	0.984676	1.01965	0.970531	1.00778
30.52	0.94473	0.087314	1.02551	0.82981	1.0049	0.849165	0.936866	1.01585	0.964987	0.945732	0.835787	0.777775	0.967547	1.00598	1.0017	1.00739	0.953704	0.948573	1.15769	0.803016	0.90271	0.954583	0.9652	1.03023	0.963157	0.86052	0.835358	1.0856	0.917596	0.905504
30.66	0.948877	0.102622	1.02045	0.947582	0.930544	0.76794	0.946607	0.941438	0.88502	0.897766	0.865945	0.862744	0.881638	0.937916	1.04398	1.00876	0.886014	0.916367	1.13019	0.667308	0.97825	0.976381	0.903736	0.990977	1.06957	0.921941	1.18255	1.00919	0.940997	1.05676
30.8	0.941515	0.083945	1.02603	0.907201	0.956584	0.908022	0.974235	0.992598	0.93804	0.789981	0.731706	0.890501	0.962147	0.890009	0.936891	0.982058	0.901375	0.883787	1.12338	0.7683	1.01528	0.995718	0.893063	0.942768	1.02957	0.923705	0.977721	1.01812	0.976314	1.02731
30.94	0.932453	0.102405	1.04724	0.775971	0.834716	0.877587	1.05915	1.01797	0.83245	0.983345	0.850835	0.958807	0.899803	0.890818	0.88629	0.99357	0.83903	0.773821	1.07314	0.813854	1.00645	1.11993	0.90869	0.970512	1.05515	0.864616	0.789035	1.10629	0.940435	0.939176
31.08	0.914385	0.083913	0.962236	0.845419	1.06082	0.804278	0.815301	0.952305	0.991786	0.930645	0.829671	0.883417	0.966794	0.766962	0.87012	1.06015	0.877725	0.856294	0.899761	0.813114	0.978627	1.07631	0.939375	1.00869	0.856044	0.888175	1.02584	0.909844	0.864491	0.868587
31.22	0.922449	0.113025	1.08796	0.88718	0.989032	0.793373	0.858213	0.841706	0.802891	0.885976	0.913926	0.912839	0.896878	0.854394	0.947279	0.897764	0.748863	0.885223	1.05771	0.668895	0.917641	1.21199	0.986493	1.02145	1.02104	0.864772	0.987859	0.928831	0.863938	1.09445
31.36	0.953346	0.092603	1.13882	0.93951	0.962499	0.946076	0.856515	0.971965	0.931309	0.931667	0.990887	1.00012	0.998177	0.906658	0.933649	0.847454	0.804721	0.899385	1.12262	0.756846	1.01301	1.18149	0.861386	0.987794	1.01416	0.92536	0.980488	0.96062	0.938079	0.892417
31.5	0.942849	0.091801	1.00065	0.904074	0.920792	0.85421	0.922654	0.954396	0.889534	0.958863	0.917927	0.985223	1.02206	0.934952	0.926293	0.849882	0.915758	0.83228	0.957348	0.781492	0.972628	1.07538	0.916696	0.998156	0.944825	0.863015	0.781978	1.21019	1.0936	1.01492
31.64	0.911156	0.092879	0.946735	0.767783	1.01317	0.793669	0.952244	0.837516	0.855005	0.873724	0.683121	0.916257	0.925935	0.850016	1.00593	1.09904	0.896439	0.894466	1.02616	0.791777	0.955459	1.01413	0.913157	0.977922	0.922685	0.792982	0.8801	1.00333	0.986911	0.936698
31.78	0.92735	0.097827	0.923525	0.879512	0.916462	0.825551	0.927021	0.774877	1.00266	0.997354	0.799038	1.09799	0.973071	0.847218	1.00107	0.859984	0.829221	0.875753	0.98898	0.792852	0.982125	1.15693	0.929714	0.982583	0.958739	0.848973	0.969238	1.0881	0.949727	0.787523
31.92	0.919864	0.077865	0.986348	0.874186	0.813056	0.904364	0.854946	0.923791	0.881371	0.930546	0.87583	1.15125	0.929053	0.842087	0.902293	0.826709	0.944244	0.841441	0.946509	0.875188	0.897718	1.01911	1.02551	0.954754	1.04738	0.80139	0.945799	0.953499	0.857317	0.950497
32.06	0.926703	0.094164	0.985874	0.870925	0.87483	0.750501	1.0177	0.827475	0.906667	0.899355	0.798642	0.93708	0.93228	0.844858	0.947199	0.903042	0.780239	0.954842	0.910938	0.817109	0.944321	1.09875	1.0402	1.03214	0.92943	0.901192	1.17108	1.00777	0.923064	0.940186
32.2	0.936675	0.0873	0.921722	0.905204	0.91815	0.792297	1.01944	0.83362	0.812312	0.95757	0.818981	0.933042	0.877608	0.966644	0.968241	0.955679	0.840715	0.955516	1.06877	0.79531	0.99697	1.00697	1.00281	0.99054	1.09307	0.985211	0.864207	1.10499	0.86308	0.978228
32.34	0.95548	0.093501	1.04253	0.991643	0.998227	0.792833	1.04165	1.10189	0.835131	0.961273	0.855888	1.04347	0.86742	0.850098	0.927667	1.2194	0.922818	0.863994	1.02816	0.869193	0.927332	0.948444	0.945466	0.955583	1.00555	0.886631	0.981411	1.01261	0.855834	1.02129
32.48	0.935598	0.123966	1.05561	0.897706	0.935983	0.906093	0.980624	1.01042	0.821381	0.966873	0.802596	1.09008	0.912072	0.778442	1.01699	0.875187	0.826621	0.869487	1.03653	0.626083	1.08528	1.03114	1.05439	0.960149	1.20027	0.742643	0.833482	1.04502	0.89926	0.936319
32.62	0.959672	0.090245	1.05779	0.910363	0.972742	0.785311	1.11921	0.908245	0.901495	1.03311	0.867822	1.00519	0.933684	0.88745	1.03363	1.08207	0.884409	0.846464	0.98689	0.79183	0.955792	1.11619	0.904166	0.987356	1.01493	1.00326	0.882845	1.08722	0.973386	0.937959
32.76	0.96829	0.109833	1.06254	0.812134	1.01299	0.932774	1.09509	1.00905	0.943482	1.03132	0.885598	1.10493	0.975018	0.849592	0.880529	1.00463	0.838298	0.932482	1.0414	0.698213	1.20426	0.977889	1.0381	0.991074	1.17092	0.886736	0.953115	0.996711	0.886195	0.897068
32.9	0.948996	0.081865	0.995419	0.84216	0.984808	0.794839	1.04146	0.955272	0.805202	0.925855	0.842403	0.954867	0.909062	0.847574	1.13633	0.982364	0.970269	0.903676	0.926529	0.987215	0.957009	0.999629	1.0048	0.959038	1.13005	0.953856	0.921513	0.959428	1.00745	0.873821
33.04	0.978858	0.110725	1.09384	0.916015	1.04421	0.75502	1.11431	1.06086	0.896443	0.905252	0.846059	1.0738	1.06392	0.869776	0.949238	0.976431	1.04459	0.919731	1.10518	0.73955	1.10613	0.991806	1.13254	1.04087	0.940037	0.807293	0.927948	1.04096	1.09149	0.954732
33.18	0.950368	0.074458	1.0473	0.975221	0.91846	0.868171	0.974468	0.903605	0.870425	0.966717	0.892141	0.85086	1.02741	0.810708	0.935345	0.882031	0.918566	0.907708	0.929226	0.897832	0.974563	0.886414	1.03437	1.05347	1.06051	0.901799	1.03002	1.05346	0.951355	1.08815
33.32	0.9596	0.091501	0.975653	0.906182	0.999091	1.01937	1.09662	0.901336	1.02232	0.958794	0.795915	0.819578	0.982435	0.897334	0.959055	0.957959	0.908636	0.977154	1.07249	0.835154	0.856434	1.06272	1.01767	0.934332	1.21201	1.01295	0.891492	1.0017	0.854019	0.940373
33.46	0.943206	0.090004	1.05303	0.931547	0.803789	0.8466	0.959272	0.97878	0.97535	0.985706	0.787326	0.996782	0.993061	0.855193	0.885259	1.16504	0.933592	0.815367	1.09141	0.857666	0.964029	0.980042	1.00848	0.953023	0.862893	0.915065	0.912017	1.08639	0.897877	0.915175
33.6	0.946958	0.106196	1.01271	0.810466	0.936108	0.811703	1.03576	0.895102	0.914008	0.918054	0.861923	0.939313	0.983086	0.968855	0.992059	1.23125	0.815268	0.834153	1.04615	0.806559	0.930412	0.972102	0.846317	0.885666	1.15714	0.853745	0.99681	1.10882	0.99908	0.9522
33.74	0.952945	0.088676	1.01584	0.899567	1.01864	0.880942	0.947949	0.887888	0.964547	0.964045	0.872676	0.973229	0.986502	1.0034	1.01467	1.14245	0.87518	0.81961	1.07291	0.803602	0.885737	1.04934	1.08598	0.937134	0.984313	0.842998	0.848311	1.08658	0.949615	0.86882
33.88	0.967729	0.081641	1.01548	0.98174	0.900948	1.02353	0.931949	0.927123	0.875419	0.955763	0.845766	1.09702	1.00287	0.926196	1.02227	0.922614	0.864302	1.05837	1.02706	0.860238	0.889946	1.11638	1.09998	1.00985	1.01765	0.838907	0.934354	1.04139	1.03011	0.879185
34.02	0.945714	0.093624	1.04252	0.924804	0.88823	0.848374	1.03171	0.949781	0.861067	0.963156	0.88751	0.878695	1.00882	0.883296	0.805993	1.00215	0.80517	0.934999	1.16626	0.835101	0.959818	1.07182	0.906089	0.912111	1.00702	0.818779	0.937833	1.07392	1.10064	0.974332
34.16	0.921925	0.107308	0.981508	0.931167	0.832074	0.902183	0.969119	0.851426	0.815948	0.877488	0.841515	0.932736	0.972548	0.881432	1.00944	0.995898	0.823032	0.777299	1.12209	0.715111	0.816849	1.17414	0.947659	0.989649	1.07873	0.857482	0.847515	0.991104	1.04278	0.835981
34.3	0.937481	0.099048	0.9902	1.01664	0.992229	0.851335	1.12041	1.00608	0.861798	0.931863	0.937721	0.884579	0.899041	0.944906	0.87197	1.12695	0.84569	0.759249	1.05654	0.893503	0.916915	0.871706	0.912267	0.934184	0.988735	0.813742	0.982962	1.14553	0.93406	0.75867
34.44	0.934516	0.077686	0.874315	1.00763	1.04698	0.896317	0.798491	0.944776	0.860223	0.993698	0.997447	0.903541	1.02923	0.935652	0.995379	0.848609	0.826908	0.843426	0.973651	0.86457	0.995326	0.938923	0.943516	0.977277	1.10974	0.801324	0.998885	0.909902	0.956783	0.893923
34.58	0.942565	0.093884	0.926529	1.03743	0.976061	0.836166	0.866253	1.0258	0.878111	0.815249	0.787464	0.986532	1.00656	0.940682	0.927218	0.983979	0.898704	0.840861	1.04105	1.02621	0.842942	0.997188	0.978133	0.904957	1.23334	0.892689	0.924659	0.964136	0.830969	1.02196
34.72	0.947189	0.082957	0.906234	0.97868	0.967605	0.895485	0.817252	0.806112	0.980246	0.866747	0.845346	1.03978	0.902102	0.987921	0.991913	0.969539	0.959931	0.841311	1.19064	0.840156	0.907272	1.00373	0.960501	1.00374	0.985038	0.917781	0.983724	1.00686	0.91013	1.05554
34.86	0.95383	0.090846	0.931657	0.93497	0.996323	0.8349	1.20999	0.953428	0.975361	0.894281	0.923505	0.967233	0.948351	0.956155	0.993743	1.06517	0.863975	0.90201	0.963936	0.931969	0.928443	1.06415	0.925063	0.963728	1.16523	0.927447	0.933374	0.957344	0.826631	0.768872
35	0.933617	0.082144	1.09145	1.04342	0.88047	0.839737	0.985252	0.913304	1.03624	0.842714	0.974682	0.956828	0.856749	1.00455	0.884837	0.985403	0.83865	1.0252	0.939326	0.810067	0.843863	1.09592	0.881457	0.99629	0.955375	0.892757	0.817052	0.9555	0.917745	0.876428
35.14	0.967226	0.076835	1.01848	0.956516	0.929294	0.923195	1.17178	0.866684	0.936742	0.793273	0.960545	0.959643	0.984981	0.949051	0.944995	1.01643	0.995369	0.874424	1.03773	0.887766	1.0627	1.07045	0.941784	1.01533	0.92622	0.901844	0.975435	1.08384	0.911742	0.98609
35.28	0.949598	0.084805	1.01098	0.959891	0.828695	1.00682	0.994656	0.920977	0.891839	0.881439	0.976387	1.15629	0.968642	0.868359	1.01875	1.12617	0.891464	0.800131	1.04384	0.81115	0.918337	0.933822	0.878231	0.963435	1.00132	0.950136	0.890915	1.00452	0.999524	0.892016
35.42	0.95681	0.11757	1.02294	0.858137	0.974955	0.790032	1.12579	0.985004	1.11245	0.856307	0.901799	1.02287	0.986866	0.994566	1.09683	0.791498	0.789731	0.885254	1.15618	0.743082	0.785013	1.03106	0.984234	1.03464	1.10039	0.997097	0.975202	1.05545	0.836848	0.896478
35.56	0.939353	0.089067	0.916728	0.801915	1.09119	0.809084	0.970862	0.889445	1.00394	0.899759	0.909684	0.830049	1.00831	0.976399	0.944686	1.21486	0.824018	0.914675	0.984795	0.835348	0.895975	0.997798	1.0269	0.991451	0.912337	0.915358	0.97219	0.959747	0.93845	0.865949
35.7	0.929204	0.067999	0.986254	0.941207	0.969575	0.918614	0.989268	0.902937	0.976008	0.885946	0.994543	0.989797	0.949455	0.90573	0.852106	0.832497	0.925088	0.963413	0.933113	0.713475	0.946455	0.853496	1.02165	0.906153	1.05264	1.00341	0.888346	0.915594	0.895546	0.905397
35.84	0.927766	0.085044	0.961736	0.915918	1.01588	0.873171	1.0463	0.902088	1.08138	0.899681	0.859622	0.930143	0.916839	0.85875	0.952236	1.08921	0.89841	0.894203	0.905452	0.704184	0.826716	0.908094	0.895294	0.948277	1.02241	1.03599	0.829015	1.01238	0.941358	0.852722
35.98	0.943498	0.088659	0.918335	0.87322	0.857119	0.795655	1.0423	0.867205	1.06774	0.834922	0.916614	0.976348	0.941732	0.828078	0.966184	1.02826	0.975162	0.859032	1.02693	0.917192	1.05137	1.17383	1.03686	0.940234	1.00248	0.926235	0.870692	0.925802	0.967008	0.831426
36.12	0.936854	0.102517	1.0106	0.811386	1.05054	0.877116	0.918742	0.944345	1.03695	0.833398	0.821192	0.898366	0.884148	0.965585	0.839755	1.10836	0.851785	0.988407	1.11225	0.702473	0.960531	1.01342	1.05826	0.904677	1.01155	1.03225	0.767672	0.998227	0.884476	0.945457
36.26	0.916213	0.076456	1.05011	0.940082	0.987701	0.851385	0.95717	0.948816	0.922312	0.782456	0.870689	0.72377	0.904188	0.913311	0.956849	0.7863	0.803364	0.887771	1.01206	0.903231	0.912359	0.975442	0.959427	0.98663	0.983177	0.936192	0.928212	1.00555	0.921816	0.843603
36.4	0.938851	0.101911	1.08255	0.898228	0.952593	0.75696	1.03072	1.03978	1.19876	0.905955	0.772907	0.947955	0.990323	0.94849	0.926926	0.94104	0.814602	0.801456	0.887585	0.81884	0.990875	0.945112	0.805356	0.913424	1.07408	0.99014	0.947956	1.02342	0.884539	0.997259
36.54	0.935303	0.076891	1.04748	0.818804	0.964512	0.854994	1.04806	1.03187	0.955208	0.880035	0.824272	0.819777	0.994329	0.898888	0.931527	1.04697	0.890267	0.791197	0.980308	0.978771	0.969294	1.01108	0.903289	0.972265	0.895021	1.02493	0.928721	0.924309	0.9703	0.832009
36.68	0.930181	0.092633	1.06642	0.92608	0.938104	0.743566	1.02739	1.0222	0.942419	0.886303	0.788236	0.973242	1.01564	0.900171	0.87938	1.03317	0.933489	0.974313	0.8615	0.876156	0.902803	0.937922	0.712165	0.993745	1.01357	1.0584	0.880481	0.879816	1.04941	0.828994
36.82	0.939669	0.092994	1.06109	0.872671	1.09365	0.842904	0.969195	1.07506	0.96375	0.808292	1.00878	1.02505	0.913873	0.93679	1.02771	1.01196	0.910781	0.89555	0.699632	0.794274	0.93849	1.03284	0.844987	0.912205	1.01246	0.990534	0.887339	0.866772	0.925851	0.988243
36.96	0.966492	0.080004	1.12003	0.899057	1.03819	0.907519	1.04272	0.9753	0.942682	0.9773	0.878691	0.972757	0.963036	0.969088	0.948291	0.935879	0.863535	0.938382	1.12999	0.780858	0.989922	1.03092	0.86882	1.03047	0.944293	0.987294	0.879573	0.974422	0.961389	1.11136
37.1	0.962921	0.062199	1.04046	0.927924	0.95553	0.841722	0.95756	0.944729	0.903226	1.00442	0.93128	0.970407	1.06608	1.02819	0.872746	1.05232	0.90183	0.938698	0.987547	0.946976	0.881478	0.945301	0.927808	0.937305	1.0151	0.977994	0.937521	1.08612	0.918604	1.0629
37.24	0.956935	0.093506	1.03826	1.00615	0.907143	0.93624	0.959937	0.973923	0.958942	0.888902	0.765534	1.01902	0.976554	0.962966	0.86943	0.984556	0.863108	0.942375	1.22679	0.90003	0.931262	1.15769	0.892015	1.01979	0.938117	0.929946	0.794128	0.990372	0.926428	1.03458
37.38	0.966418	0.082609	0.986727	0.906578	1.03754	0.970264	1.0532	0.849367	0.908034	0.856048	0.975683	0.995328	1.04916	0.914146	0.993772	0.925144	0.871141	0.992372	1.02364	0.79108	0.883064	1.10345	1.04015	0.958656	1.09078	0.941328	0.898434	1.08289	1.06952	0.892194
37.52	0.948783	0.093809	0.912847	0.955517	0.851581	0.819105	1.05463	1.066	1.0267	0.848634	0.842852	0.905891	1.07519	0.962352	0.863472	0.824326	0.844827	1.05823	1.0404	0.780474	0.898241	0.968017	0.896999	1.02342	1.12076	0.935978	1.0332	1.03703	0.986001	0.933245
37.66	0.971373	0.083659	1.05411	1.01538	0.944658	0.687313	1.0879	1.05595	1.04983	1.01383	0.961221	1.00297	0.988996	1.02406	1.01798	1.02857	0.97689	1.01727	1.05536	0.912942	0.872232	0.971954	0.935067	0.92952	1.02516	1.00167	0.827157	0.909627	0.90369	0.927137
37.8	0.95369	0.091255	0.988654	0.866379	0.845008	0.765993	0.990363	1.02876	1.07895	0.989054	0.869803	0.920308	1.03512	0.86573	0.860578	1.09129	0.894886	1.01114	0.971923	1.0611	0.954009	1.05157	1.00689	0.959789	1.00633	0.896563	0.997989	1.06217	0.873146	0.759828
37.94	0.959717	0.098491	0.999197	0.867208	0.962558	0.826733	0.853813	0.976596	1.03296	0.967569	0.96473	0.958837	1.07051	0.982334	0.878173	1.18041	0.749389	1.09178	1.01663	0.797648	0.974435	1.02974	0.992963	0.959821	1.04542	1.01611	0.980966	0.970232	0.966736	0.758561
38.08	0.948989	0.092841	0.948127	0.872041	0.982027	0.687389	1.06693	1.0174	0.985234	0.928763	0.886975	0.94379	0.990516	0.978158	0.993886	0.945659	0.821586	0.916429	1.1011	0.771444	0.874229	0.987159	0.865387	0.958156	1.04192	1.11236	1.02808	0.935492	0.97257	0.958875
38.22	0.950688	0.09711	1.02857	0.849069	1.02103	0.791571	1.04217	0.982701	1.07182	0.941531	0.874121	0.93516	1.0372	0.819097	0.88526	1.1237	0.738825	1.01268	1.01946	0.828182	0.892434	1.04186	0.936652	0.996642	1.07702	0.982855	0.874614	1.0311	0.897821	0.886111
38.36	0.966256	0.083665	1.02778	0.882484	0.977582	0.842229	0.935824	1.01842	1.07298	0.865643	0.989987	1.11629	1.0551	0.954028	0.961519	1.12055	1.01899	0.870121	0.937113	0.835236	0.950956	1.0206	0.869783	0.983299	1.0525	0.937122	0.861714	1.0793	0.933507	0.884495
38.5	0.935041	0.106791	0.971798	0.908111	0.989884	0.841791	0.900952	0.908782	1.04609	0.924005	0.88954	1.11992	0.996538	0.998222	0.923879	1.01699	1.05527	0.868278	0.90861	0.804423	0.93243	1.17287	0.840367	0.861399	1.1727	0.848605	0.778279	0.868349	0.828089	0.804957
38.64	0.948074	0.084081	1.00182	0.809627	0.873314	0.843788	0.995281	0.987346	0.948211	0.900047	1.01032	1.08754	0.970901	0.955146	0.896693	1.07035	0.884137	0.954544	0.909937	0.7797	0.923571	1.00511	1.07758	0.893552	1.10546	0.993993	0.830644	0.969444	0.987596	0.880428
38.78	0.951667	0.097856	1.05594	0.801719	0.979177	1.07247	1.04095	0.785187	0.971974	0.953053	0.882724	1.04301	1.03257	0.915129	0.873734	1.09294	0.90467	0.970275	0.933089	0.793089	0.884527	1.00463	0.947937	1.00624	1.12355	0.854057	0.830883	1.07692	0.995388	0.820838
38.92	0.920155	0.10116	1.01324	0.784535	0.896488	0.598221	0.964769	0.862904	0.902419	0.849445	0.890677	1.09065	1.01267	0.928994	0.940677	0.914677	0.975846	0.927646	0.909708	0.702553	0.915336	1.00869	0.996877	0.9076	0.97182	0.8751	0.975173	1.00449	1.045	0.89814
39.06	0.933274	0.067952	1.02503	0.910222	0.954568	0.79367	1.02173	0.828581	1.04068	0.908399	0.865943	1.027	0.997652	0.907116	0.947981	0.8315	0.871504	0.952431	0.934568	0.836252	0.919824	1.00141	0.915179	0.905709	0.987488	0.954229	0.877029	1.02805	0.964701	0.923242
39.2	0.967907	0.100869	1.00425	0.836732	0.883441	0.770499	1.15038	0.889492	0.950746	1.02968	0.921055	1.08668	1.02283	0.939171	0.958414	0.925212	0.915645	1.04236	1.22863	0.79104	0.891491	0.947256	1.05561	0.936634	1.02313	0.940144	0.95848	1.03164	0.903469	1.06727
39.34	0.931781	0.101568	0.992535	0.85116	0.784002	0.799641	1.22721	0.906154	0.904703	0.878779	0.857822	0.982349	0.882228	0.876711	0.908903	0.978587	0.875505	0.880568	1.10565	0.820419	0.924255	1.03447	1.01917	0.971873	0.955843	0.845777	0.904149	1.11722	0.966046	0.838132
39.48	0.946232	0.093255	1.00114	0.838405	0.825487	0.701162	1.10048	0.819066	0.969822	0.969873	1.05611	0.884258	0.986393	0.954677	0.857046	0.938969	0.90786	0.953485	1.04405	0.925135	0.975819	0.983033	0.957374	0.869893	1.09271	0.913571	0.879641	1.11632	0.988745	0.983959
39.62	0.984032	0.108579	1.00833	0.860135	0.911659	0.758702	1.07922	0.891107	1.06431	0.96571	1.05219	1.09608	0.971928	0.870885	0.85388	0.919517	0.848094	1.03144	1.11763	0.849328	1.00526	1.17938	1.07652	0.969633	1.1336	0.904211	0.998453	1.16403	0.934919	1.03675
39.76	0.973021	0.080304	1.04124	0.925598	0.964035	0.9877	0.969552	1.00162	0.876666	0.970566	0.96358	1.02068	1.10018	0.871267	0.853934	0.932467	0.807451	1.00638	0.973548	0.814316	1.02917	0.997192	1.11474	0.908891	1.05429	0.943433	0.997509	1.0779	0.961686	1.07899
39.9	0.971512	0.070451	0.992714	0.988442	1.01261	0.928035	1.03571	0.973107	0.974923	0.917925	0.932559	0.972697	0.87884	0.889117	1.03189	0.996247	0.829767	0.977294	1.11537	0.875902	0.912854	1.06521	0.969118	1.04055	1.07965	0.841575	0.988475	0.957636	0.978602	1.04551
40.04	0.949139	0.086463	0.969352	1.03435	1.0456	0.837531	1.05945	0.903077	0.998577	0.780366	1.01109	0.950079	0.933931	0.894713	0.915167	1.06819	0.761214	0.906888	0.952937	0.861867	0.964092	0.906857	1.11217	0.923955	0.970161	1.01204	0.810142	0.988704	0.995534	1.00787
40.18	0.955889	0.097248	0.937603	0.943245	1.06705	0.846229	1.15905	1.06544	0.883334	0.95325	0.919313	1.03314	0.975503	0.901976	0.934895	0.96991	0.837875	0.969962	1.06524	0.745343	0.836227	0.985339	1.04854	0.916097	0.913041	0.785764	0.913324	1.004	1.05932	1.09488
40.32	0.940927	0.091546	0.982005	0.869666	0.938512	0.797761	1.0085	0.906599	0.856771	0.77529	0.867802	0.915064	1.04735	0.956193	0.939768	1.0061	0.922291	0.925205	0.976003	0.741859	0.920058	1.0555	0.92499	0.933054	1.15015	0.908006	0.928717	1.02773	1.11086	0.954152
40.46	0.965149	0.084447	1.01641	0.824802	0.956237	0.862742	1.08396	0.833577	0.991452	0.939025	0.989979	0.960881	1.08119	0.885913	0.931282	1.02482	0.910685	0.922898	0.954077	0.769324	0.963873	0.99023	0.972383	0.99274	1.04208	0.886745	1.10386	1.00365	1.01725	1.1121
40.6	0.960925	0.088794	1.01572	0.807494	1.0003	0.851241	1.11512	0.95134	0.941101	0.956644	0.857927	0.86208	0.996121	0.864517	0.930221	1.0524	0.87889	0.983594	1.04449	0.944583	0.871705	0.969738	0.987225	0.984732	0.955314	0.942034	0.865884	1.15767	0.966358	1.15146
40.74	0.965966	0.082622	1.08346	0.851302	1.02127	0.875803	1.04709	0.923216	0.914322	0.968216	1.02206	0.980969	0.926416	0.87578	0.934223	1.07726	0.952984	1.15346	0.95017	0.816126	0.906818	1.11767	0.853611	1.01794	0.982695	0.905238	0.979841	0.987344	0.915631	1.00614
40.88	0.949444	0.099523	0.949052	0.842117	0.972654	0.682526	1.14819	0.850983	0.913952	1.0221	0.919162	0.984905	1.02915	0.972391	0.935232	0.911952	0.799865	0.851815	1.0928	0.918441	0.955726	1.06043	0.850595	0.898776	0.966116	0.96198	0.926513	1.06937	1.00124	1.09639
41.02	0.971523	0.106692	0.918784	0.933351	0.931174	0.957156	0.991533	0.889569	0.829464	0.811907	0.756262	1.02687	0.88007	0.91953	1.19321	1.00621	0.983169	0.999836	0.92194	0.824782	0.92443	1.17756	0.966381	0.956189	1.05521	1.08007	1.01867	1.12122	1.00369	1.12439
41.16	0.951831	0.090986	1.06069	0.906071	0.907227	0.997234	0.908465	0.902835	0.964679	0.885819	0.927769	0.992952	0.883319	1.0264	0.952111	1.03641	0.781593	0.992275	0.969266	0.748104	0.861919	1.11858	0.942409	0.918416	0.990115	0.888652	0.873546	1.06702	0.993187	1.15421
41.3	0.958865	0.074063	0.966344	0.968099	0.846702	0.905373	1.07026	1.00863	0.910411	0.85626	0.901305	1.00419	1.00747	0.931467	0.939408	0.95968	0.938716	0.928386	0.933705	0.820935	0.910102	0.972543	0.907981	0.967082	0.969351	1.01794	0.919391	1.0674	1.04899	1.17011
41.44	0.930309	0.082045	1.00107	0.93741	0.864236	1.0442	0.993382	0.901392	0.916113	0.852258	0.819341	0.87713	1.04385	0.984058	0.94283	0.944306	0.767739	0.807664	0.987169	0.803811	0.876724	0.972422	0.95736	0.83596	0.986373	1.04825	1.03155	0.900554	0.906228	1.04528
41.58	0.961269	0.09212	1.04183	1.05954	1.08387	0.965045	1.04016	0.866952	0.94508	0.958007	0.893604	0.863038	1.03713	0.965276	0.965169	1.08413	0.899544	0.819513	0.964207	0.694172	0.982436	0.991012	0.925397	0.921083	0.877391	1.00203	1.00916	0.913741	1.14243	1.00459
41.72	0.944318	0.081956	1.07981	0.898666	0.949404	0.820786	1.07156	0.887823	0.977447	0.924967	0.838739	0.876168	1.01025	0.979285	0.886036	1.07798	0.881644	1.00817	1.06065	0.822665	0.82649	0.969157	0.842525	0.929185	1.00212	0.891664	1.01911	0.902658	1.01702	0.988923
41.86	0.965511	0.078568	1.05499	1.01113	0.97481	0.93232	1.0559	1.03634	0.920636	0.937353	0.891419	0.87532	1.04485	1.00919	1.02825	1.02371	0.914901	0.970426	1.05611	0.773089	0.823574	0.9539	0.954905	0.873707	0.981527	0.881083	0.936866	1.01243	0.989661	1.11591
42	0.961532	0.088906	1.03106	0.983723	0.855053	0.868266	0.961141	0.897609	0.916383	0.904695	0.916202	0.921748	0.891768	0.882641	0.884464	1.08595	0.870073	1.04906	1.03405	0.804617	0.903141	0.949379	1.11099	1.05692	1.10558	1.08327	0.909227	0.996705	0.940468	1.10871
42.14	0.958622	0.09789	1.02477	0.921347	0.84909	0.836521	0.965088	1.00091	0.845662	0.898836	0.924763	0.86261	1.02404	0.904509	0.99336	0.980361	0.982864	0.961431	1.06482	0.801541	0.983626	1.09712	0.844831	1.09533	1.18754	0.945054	0.851451	0.92967	0.920493	1.14377
42.28	0.968011	0.075929	0.875896	0.957927	0.995412	0.866902	1.0921	0.943838	0.913406	0.887478	1.04751	0.982144	1.05492	0.852309	0.906693	0.98662	0.918087	0.926008	1.08008	0.806272	0.988886	1.06839	0.941649	1.05198	1.0253	1.00299	0.928762	0.984331	0.945412	1.07302
42.42	0.938526	0.084163	0.968926	0.909965	0.934628	0.774462	1.01586	0.849246	0.857795	0.862409	0.940565	0.966656	0.962147	0.938297	0.930258	0.982009	0.916605	0.916176	0.912046	0.815489	0.902439	0.901939	1.19186	1.05346	1.00499	0.931783	0.875469	1.06036	0.87226	1.03063
42.56	0.961705	0.085169	0.958687	0.917209	0.954134	0.806152	1.02599	1.02033	1.10314	0.926309	0.929956	0.947856	1.00553	0.898003	0.894762	0.981335	0.896039	1.12573	0.915078	0.735485	0.979634	1.07255	1.02831	1.01775	0.889997	0.928704	0.930489	1.03293	0.938297	1.06734
42.7	0.950754	0.108326	0.952526	0.801899	0.96775	0.766941	0.938636	0.921063	0.941886	0.851678	1.06217	0.831975	0.900494	0.939434	0.991205	1.26172	1.02683	0.840592	0.946697	0.812964	0.881131	1.00624	0.95483	0.894264	0.963497	1.08809	1.08522	1.10057	1.03053	0.860274
42.84	0.924303	0.087757	1.01315	0.891049	0.991416	0.923286	0.930973	0.941466	0.930148	0.794505	0.900462	0.883018	1.0184	0.839521	0.778899	1.00916	0.817558	0.986134	0.896613	0.834648	0.829191	0.823922	1.01869	0.991038	1.02437	0.89041	0.873208	1.16761	0.924571	0.957073
42.98	0.944766	0.105451	0.990899	0.806962	0.968917	0.935132	0.891671	0.945124	0.953732	1.00961	0.957622	0.979967	1.08525	0.901601	0.972195	1.00239	0.818165	0.811494	1.09199	0.677481	0.924371	0.945981	0.963009	0.984022	0.995252	0.993838	0.818258	1.21736	0.997018	0.814132
43.12	0.951249	0.094219	0.924139	0.830339	0.936027	0.966852	0.881647	1.08938	1.0056	0.962715	0.823941	0.891034	1.07151	0.935749	0.936816	0.916074	0.917513	0.953998	0.901972	0.761778	0.859084	1.05909	0.844911	1.00876	1.04161	0.832534	1.07493	1.03311	1.0341	1.13975
43.26	0.944072	0.084749	0.915803	0.894802	1.03786	0.793766	0.989616	1.0016	0.839969	0.87686	0.894317	0.922712	1.07687	0.926393	0.983448	0.9735	1.01219	0.996455	0.953274	0.854998	0.838983	0.919432	0.830536	0.928116	0.982292	0.822996	1.08577	1.13614	0.986019	0.959318
43.4	0.945793	0.092932	0.943651	0.86558	1.10135	0.911774	1.11446	0.834931	0.833863	0.905967	0.977744	0.940509	0.923067	0.906349	1.10614	0.92539	0.953519	0.999139	0.917574	0.679226	0.927475	1.07948	0.949183	0.891666	1.02537	0.881256	0.933061	1.04845	0.959157	0.946882
43.54	0.938774	0.0764	0.980445	0.900806	0.94306	0.771705	0.997135	0.941397	0.876623	0.854416	0.989329	0.955075	0.879733	0.941276	0.886337	1.10167	0.840055	0.982825	0.990279	0.816039	0.922689	1.09389	1.00215	0.956258	0.988313	0.848284	0.903962	0.932673	0.98187	1.00737
43.68	0.93351	0.098604	0.979489	0.912159	0.993314	0.75807	1.11023	0.909872	0.909677	0.816844	0.821997	1.07369	0.836554	0.988017	0.976427	0.864747	0.931019	0.940924	0.871204	0.795669	0.910748	0.91335	0.91836	0.941158	1.03529	0.807992	0.948734	1.09604	0.91651	1.16019
43.82	0.952543	0.087501	0.907326	0.940145	1.02425	0.856243	1.02527	0.919712	0.991175	0.877874	0.847298	1.00672	0.832909	0.973452	1.02892	1.12982	1.02835	0.950788	0.987523	0.7782	0.882307	1.02311	0.824888	0.947199	0.966123	0.855244	1.04	1.05262	0.893652	1.08007
43.96	0.965463	0.115288	0.912043	0.901199	1.06441	0.716874	1.22241	0.91468	0.989028	1.02425	0.868659	0.962671	0.954161	0.931775	0.969215	1.18937	0.950091	0.982241	0.993062	0.693239	0.888159	0.952194	0.919577	1.05212	1.02761	0.88296	0.911784	0.953896	1.05563	1.14964
44.1	0.972864	0.111285	0.896356	0.940253	1.02861	0.706382	1.10732	0.975376	0.901876	0.907197	0.977034	1.08688	1.01056	0.933676	0.970896	1.25178	0.960752	1.01403	0.94082	0.700005	0.962946	0.950569	0.858367	0.983463	0.995292	1.00806	0.944413	1.14077	1.05634	1.03018
44.24	0.96902	0.091559	0.992611	0.934394	0.984988	0.907025	1.22126	0.886554	0.98899	0.906696	0.896447	0.986099	0.995281	1.00228	0.963806	1.14639	1.09312	0.936365	0.853501	0.751009	0.866847	1.04216	0.96008	0.944103	1.03561	1.01087	0.954908	1.01798	0.90755	0.945628
44.38	0.957399	0.11406	0.829588	0.979198	1.02152	0.781453	1.03866	0.98204	0.901796	0.967065	0.860757	1.0376	1.01789	1.01181	0.928908	1.05208	0.899884	1.04277	0.888979	0.723263	0.834186	1.04592	1.04127	1.07087	1.10767	0.82589	0.795663	1.23391	0.92203	0.964495
44.52	0.940301	0.095986	0.902245	0.943173	0.99603	0.738231	1.04407	0.99037	0.896297	0.970148	0.896022	0.957269	1.0157	0.922561	0.821921	1.06223	1.00028	1.03269	0.862776	0.638131	0.987149	0.958299	0.849423	1.01632	0.967505	0.906485	0.943862	1.07823	0.934402	0.996626
44.66	0.962412	0.099729	0.91985	1.0576	0.924146	0.847823	1.02396	0.931463	1.00375	0.813406	0.968822	0.897679	1.02735	0.94819	0.967758	0.972226	0.947128	1.13965	0.942083	0.630732	1.00556	0.986119	0.904768	0.952842	1.0652	0.924082	1.0442	1.15204	1.01163	0.937471
44.8	0.95537	0.087921	0.913347	0.923908	1.01717	0.921115	0.940502	0.755651	1.03632	0.955931	1.00385	0.970166	1.00081	1.01488	0.928943	1.08794	1.03913	0.970501	0.968946	0.690588	1.00737	1.04791	1.02792	0.959306	0.921728	1.01281	0.903925	1.01828	0.893607	0.81782
44.94	0.960448	0.095522	0.930005	0.95521	1.03797	0.842478	1.10142	0.826724	0.9426	0.996952	0.989837	1.09417	0.986337	0.996062	1.03516	1.14435	0.950025	0.909877	0.867069	0.717436	0.900793	0.946194	1.02935	0.934277	0.883475	0.856362	1.03024	1.02993	0.881143	1.07709
45.08	0.935404	0.100556	0.928438	0.832409	0.927175	0.952004	1.17764	0.857524	0.82993	0.909754	0.9259	0.872127	1.02736	0.980527	0.86839	1.01463	0.987316	0.845795	0.989465	0.621113	0.951961	0.968471	1.05405	0.927947	0.948786	1.02393	0.831293	0.992757	0.911757	1.03288
45.22	0.937159	0.082002	1.01673	0.912325	0.877297	0.877647	1.02719	0.888384	0.933828	0.929015	0.919009	0.964831	1.03537	0.990532	0.917799	1.00516	0.95141	0.891915	0.831219	0.697632	0.851766	0.998227	1.15088	0.927325	0.980394	0.876868	0.977235	0.985191	0.918533	0.906726
45.36	0.95616	0.079488	0.997133	0.913612	1.14784	0.896732	0.972891	0.867798	1.0238	0.958859	0.947585	1.0119	0.952792	0.966997	0.961027	1.0813	0.905404	0.93143	0.93524	0.731896	1.06275	0.839927	1.00448	0.911358	1.00098	0.952903	0.96099	1.02503	0.90448	0.905358
45.5	0.964461	0.090587	1.05451	0.917813	1.03735	0.811433	1.04494	0.990366	0.793098	1.08148	0.999155	0.910898	0.943894	1.00138	0.902062	1.15459	0.907317	1.1133	1.03515	0.812707	0.835264	0.994861	1.00428	0.920424	0.99087	0.983737	0.937151	0.968567	0.990516	0.867792
45.64	0.985713	0.069282	0.952301	0.947274	0.930427	0.890644	1.01808	1.07819	0.971109	1.05716	0.970606	0.93029	1.04033	1.03166	0.975766	1.02192	0.968127	1.0183	0.986595	0.828396	0.929981	1.01061	1.07717	1.02275	1.12879	1.01296	0.936706	1.07987	0.875348	0.908593
45.78	0.947634	0.079956	0.942329	0.857301	0.926027	1.03487	0.894076	0.972696	0.842011	1.00984	0.88536	0.917723	1.0016	0.983456	0.86085	1.02723	0.995843	0.892476	1.15668	0.795157	0.890612	0.903271	1.06626	0.951956	0.954834	0.865813	0.938469	1.07273	0.926136	0.968152
45.92	0.98675	0.086533	1.01712	0.917609	0.979183	0.989958	1.1688	0.873394	0.877074	0.822791	0.958695	0.996797	0.988865	0.924248	0.944314	1.06964	1.01496	0.94014	1.06299	0.886263	0.97932	1.08281	1.09407	1.07304	1.02078	0.911523	0.866744	1.11065	0.955018	1.1022
46.06	0.948877	0.085468	0.948853	0.881286	0.925897	0.760655	1.0602	0.931574	1.00695	0.93459	1.03163	0.857653	0.949465	1.001	0.892449	0.999894	0.973621	0.854116	0.946205	0.700002	0.997166	0.969605	1.04137	0.942397	0.944928	1.00352	1.02381	1.10741	0.941364	0.940965
46.2	0.954155	0.073171	0.978073	0.88853	1.01965	0.941839	1.07419	0.899335	0.881085	0.960704	0.911633	0.971117	0.904385	0.893978	1.02006	0.978567	0.851415	0.948853	1.00092	0.7885	0.957009	1.07858	1.03536	0.911139	0.856169	1.03607	0.906107	1.02676	0.937355	1.05897
46.34	0.9707	0.109894	1.13827	0.977049	0.851075	0.936014	0.919426	0.880384	0.763488	0.968604	0.926515	1.10316	0.898178	0.987762	0.954149	1.04337	0.901393	0.948231	1.30965	0.833043	1.09623	1.06682	0.939883	0.965597	0.925458	0.985571	0.95053	1.00492	0.833089	1.07174
46.48	0.970123	0.082812	1.03605	0.761097	0.947564	0.896455	0.961843	1.00529	0.855358	0.940696	0.850747	0.913699	1.05242	0.994279	0.977744	0.921276	0.863275	1.00502	1.01195	0.866411	1.00551	0.973069	1.02697	1.03994	1.02605	1.00653	1.02838	1.01761	1.00055	1.17766
46.62	0.949446	0.107387	1.08592	0.839505	0.893626	0.734475	1.03708	0.935443	0.834323	0.817126	0.982228	0.941347	1.12695	0.952852	1.02147	0.971644	0.839265	1.01504	0.926022	0.818009	0.838051	0.955135	0.879831	0.994979	1.20494	0.882345	0.921801	1.06391	1.06896	1.00222
46.76	0.962495	0.08383	1.10802	0.830746	0.94156	0.863748	1.01301	0.951052	0.904932	0.957972	0.93447	0.932119	1.08146	0.972038	1.10589	1.00992	0.9387	0.946297	0.88357	0.743869	0.878232	1.10477	1.01582	0.985342	0.920148	0.976297	0.969102	1.00472	1.04074	0.935294
46.9	0.949155	0.076409	0.946516	0.858698	0.933255	0.817984	1.09772	0.912451	0.862093	0.87978	0.878358	1.06942	1.03259	0.931962	0.96786	1.06768	0.846687	0.974331	0.885686	0.899161	0.972877	1.05538	0.924588	0.981184	0.941055	0.920374	0.982674	1.01558	0.867369	1.05303
47.04	0.986947	0.089358	1.05917	0.975467	1.06747	0.741556	0.90269	0.960085	1.04771	0.981052	0.898868	1.01263	1.05056	0.94093	0.993616	1.12931	0.953282	0.99151	1.11417	0.924421	0.960722	1.08551	1.0181	0.952935	0.833867	0.905749	1.00836	1.16517	1.00183	0.957756
47.18	0.960863	0.074292	0.957429	1.00585	0.912085	0.829523	0.985299	0.988319	0.860853	0.83668	0.930448	0.94162	1.01681	0.986712	0.926387	1.07123	0.898415	0.987055	1.06776	0.926214	0.981554	1.14097	0.895696	0.958324	1.03944	0.91322	0.91456	1.07897	0.947231	0.905521
47.32	0.969043	0.071792	0.945292	1.04305	0.952929	0.880408	1.04088	0.924322	0.96838	1.00608	1.02489	0.943132	1.07634	0.950618	1.12446	0.986524	1.03834	1.01539	1.03937	0.82079	0.994939	1.02461	0.928054	0.932118	0.899646	0.918615	0.811888	0.985898	0.92782	0.928414
47.46	0.967174	0.077159	0.959827	0.986876	1.13086	0.888312	0.943127	0.958236	0.912123	1.0875	0.957839	1.03528	1.01432	1.01189	0.932066	0.981331	0.916045	0.965178	1.05956	0.825901	0.948089	1.0657	0.86978	1.06954	0.959825	0.998912	0.916035	1.00368	0.819099	0.863937
47.6	0.958262	0.103991	0.944016	0.846677	0.905366	0.912464	1.02559	0.999596	1.03242	1.06526	1.04203	0.992898	1.12359	0.976695	0.914649	0.842002	0.773622	0.942345	1.00399	0.69362	1.02629	1.18657	0.950257	0.985166	0.879909	0.856377	0.900268	1.06643	1.0162	0.927034
47.74	0.965899	0.085138	1.00736	0.863296	0.941327	0.941645	1.03064	0.907539	0.896858	1.09629	0.856933	0.910917	1.13924	1.00657	0.987188	1.13772	0.860164	1.01876	0.83966	0.802314	0.924897	1.00154	1.04708	1.02363	0.997659	0.965726	0.991274	1.00337	0.92048	0.925085
47.88	0.972421	0.099127	1.06299	0.928715	1.03393	0.688941	1.00661	0.874	0.956407	1.00874	0.790662	0.980674	1.10897	0.923343	1.02852	1.03726	0.944984	0.953859	0.92437	0.904318	0.933347	0.975903	1.01405	1.01401	0.863545	1.00381	0.971012	1.02878	1.04229	1.22375
48.02	0.992311	0.094308	1.17161	1.00499	1.01784	0.939908	0.997327	0.980613	0.971916	0.918397	0.886884	0.94581	1.04282	0.879347	1.02042	1.02729	0.966124	0.994853	1.18616	0.817385	1.19649	1.09903	0.973458	0.886914	0.861205	0.910955	0.999651	1.092	1.01381	0.981503
48.16	0.951391	0.105664	1.04845	0.938016	0.913741	0.751108	0.930815	0.870723	0.904739	0.959425	0.979752	0.969326	1.04943	1.00785	0.835042	1.10661	0.873295	0.914054	0.994757	0.684329	1.18666	1.09863	1.06656	0.982679	0.900949	0.924702	0.910097	1.02975	0.935216	0.872245
48.3	0.980103	0.05991	0.983874	0.951114	1.05824	0.906708	0.898336	0.898649	0.913544	1.05668	0.905376	1.0672	0.997465	0.988222	0.909405	1.0406	0.966802	0.996843	0.964942	0.924044	1.06022	1.08507	0.982206	0.967058	0.979887	0.922392	0.969258	1.0728	0.937245	1.03871
48.44	0.93087	0.094018	0.910178	0.872096	0.964309	0.733908	0.857336	1.00538	0.833355	0.988702	0.803526	0.88113	1.01583	0.911422	0.925758	0.958331	0.912501	1.01481	1.08437	0.711664	0.906027	1.06736	0.918562	0.967824	1.03729	0.988876	0.900708	1.0796	0.958479	0.855039
48.58	0.948682	0.117985	1.02191	0.884982	0.955965	0.620873	0.960033	0.864417	0.866683	1.07912	0.922802	0.94372	1.07598	1.00631	0.916309	0.937395	0.945652	0.903151	1.0915	0.651444	0.952407	1.11311	0.959669	0.961208	1.03391	1.16711	0.876007	1.02394	0.909394	0.918094
48.72	0.960508	0.111612	1.06088	0.834539	0.877525	0.845271	1.07427	0.94785	0.901678	1.0493	0.737025	1.10421	1.28734	0.979062	0.945334	0.873083	1.00383	1.00355	0.893984	0.905591	0.950714	0.996692	0.912582	0.88524	1.09447	1.03651	0.885799	1.05613	0.8174	0.934353
48.86	0.969717	0.074284	0.952613	0.865232	0.938847	0.818053	1.04665	1.09906	1.04343	1.0841	0.834422	0.962008	0.94679	1.03203	0.922129	0.999092	0.985199	1.01444	0.910193	0.819663	1.0071	0.98593	1.017	0.9927	1.03093	1.01323	0.921759	1.03345	0.941585	0.934445
49	0.93089	0.086108	0.968878	0.926122	0.855968	0.962851	1.08999	0.919631	0.98835	1.07061	0.744979	0.903521	0.902622	0.983348	0.819452	0.908036	0.89504	0.836232	0.95559	0.803351	1.00331	0.964874	1.10922	0.926369	0.860055	0.963655	0.935463	1.0044	0.953223	0.809768
49.14	0.942001	0.097551	1.04115	0.934641	1.10207	0.896755	0.898334	0.958399	0.977494	0.938122	0.679073	0.97668	0.917641	0.928154	0.842062	0.972998	0.898033	1.00368	0.960934	0.704451	0.989313	0.894487	1.12273	0.939566	1.00171	0.849312	0.90481	1.0595	0.96166	1.02226
49.28	0.966258	0.073714	1.0708	0.971275	0.932469	0.923233	1.01465	0.886374	0.959442	1.10976	0.969608	1.09849	0.899086	0.965941	1.02485	1.00165	0.843867	0.914554	0.978203	0.936343	0.988631	0.859692	1.06215	0.874206	1.02084	0.848199	0.943159	0.969992	0.924953	1.06281
49.42	0.939751	0.068715	1.04314	0.97825	0.867341	0.907679	0.913375	0.973361	1.00507	0.869635	0.905426	0.965604	1.01345	0.936565	1.11968	0.907708	0.88125	0.826383	0.911393	0.812931	0.913626	0.958288	0.939735	0.931767	0.949614	0.976501	0.912186	0.975804	0.861492	1.05579
49.56	0.979059	0.081769	1.07356	0.989393	0.934886	0.999628	1.21278	0.929682	1.01658	1.00744	0.96786	1.06201	1.02443	0.907024	0.904216	1.05855	0.898762	0.906708	1.02399	0.844882	0.863701	1.08584	0.984105	1.01874	0.926138	0.849505	0.924891	1.03247	0.994098	0.971791
49.7	0.958405	0.090625	1.01057	0.975744	0.857054	0.872339	1.05816	0.895645	0.988325	1.03718	0.913847	0.996176	0.900741	1.00301	0.95176	1.01105	0.818655	0.844004	1.01105	0.768472	0.811451	1.00056	0.979777	0.914652	1.13353	0.936867	0.978583	1.13991	0.992664	1.03359
49.84	0.964752	0.086847	0.924436	0.973171	0.986688	0.917101	1.15487	0.810876	0.898586	1.05664	1.015	0.889916	0.988038	0.958405	0.94487	0.950513	0.832053	0.826123	0.99362	0.871488	1.00451	1.04947	0.992802	0.99381	1.11317	0.927764	0.822235	1.05232	1.03173	1.03284
49.98	0.99693	0.085342	1.05181	1.06029	0.996206	0.955398	0.922142	1.00716	1.09356	0.992413	0.756522	1.03307	0.981211	0.950095	0.979034	1.03671	0.943909	1.03224	0.991244	0.880956	0.983071	1.12669	1.15372	0.975586	1.15592	0.954728	1.02722	0.970582	1.04334	0.859222
50.12	0.984256	0.080337	1.02315	0.975743	1.00546	0.719481	1.08101	1.00629	0.868779	1.01537	0.994578	0.956497	1.0704	0.925063	1.00363	0.943811	0.968729	1.06776	0.86963	1.01242	0.978283	1.09803	0.941097	0.886235	0.990038	1.03434	1.03249	1.08269	0.963978	1.04418
50.26	1.00018	0.104647	0.929486	0.913703	1.16266	0.815806	1.03084	1.08966	0.993731	0.987828	0.956516	1.08551	1.11468	0.936301	0.890364	1.14034	0.818137	0.891297	1.06068	0.977828	1.14571	1.08074	1.15934	0.955775	1.0157	0.877424	0.839613	1.0723	0.991502	1.07151
50.4	0.983372	0.061453	1.0228	0.937139	1.02316	0.933872	1.03537	0.885946	1.06921	0.947407	0.920013	1.08167	1.02941	0.900239	0.989876	1.02232	0.938632	0.941914	0.856515	0.978275	1.00111	1.00345	0.985141	0.99453	1.05867	1.01818	0.884875	1.05993	1.05653	0.958224
50.54	0.977565	0.101038	1.098	0.990638	0.991421	0.792261	1.13836	0.960121	1.07853	0.93557	0.994131	0.86489	1.02112	0.876924	0.902883	1.07925	0.979041	0.992585	1.09585	0.727497	0.971043	1.16884	0.8766	1.00843	0.886222	1.02334	1.04975	0.944824	0.908681	1.01501
50.68	0.976729	0.064852	0.949296	0.91883	0.998764	0.950088	1.0452	0.97316	0.931672	0.988006	0.913585	0.887088	0.990141	0.913254	1.03164	0.94091	1.0041	0.876571	1.00323	1.05385	0.993366	1.13621	1.00523	0.94995	1.04056	0.853152	0.906391	1.03896	0.989853	1.06537
50.82	0.956638	0.084832	1.02795	0.936223	0.822566	0.878363	1.04099	0.905262	1.052	0.975028	1.04007	0.962803	0.973344	0.934006	0.744225	1.05027	1.03586	1.00204	1.08847	0.952302	0.96882	0.959665	0.923233	0.828155	0.9447	0.905635	0.830348	1.01105	1.08435	0.908109
50.96	0.951218	0.076831	1.04478	0.934121	0.983639	1.00382	1.15959	0.84738	0.92701	0.957623	0.835705	0.990952	0.977529	0.958339	0.849183	0.985317	0.909264	0.925731	0.83588	0.893715	0.897487	1.08959	0.970471	0.912043	1.01711	1.00083	0.922397	1.0218	0.862079	0.920723
51.1	0.93219	0.073357	0.973922	0.876964	0.843241	0.833889	0.997849	0.876993	0.874975	1.05729	0.858815	1.00003	0.976128	0.958421	0.973562	0.846432	0.877031	1.04553	0.849915	0.803024	0.976205	0.997016	1.00939	0.95408	0.970604	0.999084	0.98912	0.960634	0.82315	0.898027
51.24	0.980594	0.101466	1.03063	0.882458	0.998397	0.808949	1.20091	1.00289	1.07289	0.875005	0.827531	1.07245	1.00497	0.968577	1.05197	0.965286	1.04395	1.13771	0.992212	0.931762	1	0.964918	1.06109	0.921772	1.06898	0.87257	1.02156	1.03858	0.744836	0.893772
51.38	0.983578	0.083681	0.974306	0.86279	0.935413	0.884616	1.04876	1.01745	0.969906	0.846098	1.03005	1.05668	1.0678	0.954292	0.909892	0.974706	1.03519	1.04482	0.933549	0.958274	0.949041	0.996138	1.07272	0.873824	0.920965	1.00481	1.21497	1.11482	0.882162	1.00614
51.52	0.973401	0.093745	0.981416	0.924611	0.92121	1.10654	0.855532	0.813923	1.04769	0.886652	0.884135	1.04854	1.14862	1.01325	0.935457	0.983827	0.960265	0.9777	0.882985	0.862809	0.892334	1.21472	0.966083	0.92884	1.02616	1.00012	0.936456	1.12064	0.951418	0.983316
51.66	0.9467	0.087549	0.964117	0.89065	1.00924	0.907937	1.06776	0.986235	0.834001	0.838813	0.871255	0.947581	0.845511	0.944935	0.95652	1.04409	1.01211	1.03705	0.872931	0.758698	0.805343	1.0511	1.02195	0.892664	1.05222	0.904885	0.96524	1.03918	0.911256	1.07433
51.8	0.951531	0.094031	0.984022	0.872307	1.08908	0.905824	0.979085	0.965005	0.934203	0.906752	1.05669	0.915526	0.962185	0.932459	0.910954	0.847987	0.991477	1.08301	0.973531	0.666464	0.821884	1.01333	0.939167	0.901791	1.10708	0.969738	0.866303	1.02826	0.926657	1.09211
51.94	0.957701	0.079261	0.984633	0.912838	1.07323	0.893845	1.01032	0.934942	0.921893	0.910117	0.914816	1.06848	0.974923	0.902063	0.89649	0.988	0.938244	0.946726	1.13952	0.831928	0.810934	1.12958	0.993162	0.977716	0.96341	0.866399	0.90933	1.03241	0.915517	0.97418
52.08	0.958817	0.08813	1.01684	0.875395	0.866234	0.837017	1.07171	0.980811	0.90941	0.953019	1.06299	0.906468	0.948449	0.972576	0.904682	0.854966	0.860477	0.971842	1.09136	0.8375	0.913495	0.986896	0.894132	1.10438	0.922168	1.10465	0.890441	1.14215	0.972985	0.99385
52.22	0.947755	0.093965	1.09551	0.930099	0.950162	0.814687	1.16429	0.953816	0.862802	0.955475	1.00258	0.969243	0.872936	0.924363	1.03132	0.922431	0.867299	0.998282	1.03889	0.79731	0.720587	1.05869	1.02256	1.00056	0.888447	0.970169	0.967822	0.933421	0.849999	0.973397
52.36	0.940535	0.073239	1.02752	0.972979	0.997215	0.787487	0.87853	0.899377	0.997448	0.915815	0.866951	0.94381	1.00128	0.932705	0.882886	1.03886	0.955951	0.967698	0.855947	0.786306	0.839444	1.02868	0.901301	0.981837	0.966778	0.966401	0.957928	1.02748	0.898166	1.05821
52.5	0.956026	0.113503	1.08526	0.922613	0.902143	0.912986	1.08466	0.814776	0.880452	0.931877	0.808224	1.00081	0.926722	1.03546	1.10051	1.05973	1.04604	1.01892	0.95297	0.706886	0.890043	0.976715	1.04411	0.955282	1.00835	0.902287	0.846405	1.24974	0.790112	0.914657
52.64	0.978185	0.082512	0.932543	0.940835	0.898068	0.870954	0.936731	1.00963	0.912478	1.0767	0.86201	1.01378	0.990748	0.930282	0.975857	1.02826	0.989295	1.15429	1.06591	0.823473	0.986973	0.924499	0.847847	1.02432	0.932196	1.07277	1.02857	1.11672	0.974061	1.06936
52.78	0.965887	0.089783	0.940208	0.832868	1.03774	0.715081	1.07788	1.0717	0.996689	1.04388	0.872144	1.00479	1.09947	0.915091	0.940443	0.979636	0.838755	0.897136	0.973472	0.867771	0.93418	1.05354	1.04961	0.998754	1.01467	0.910304	0.981615	1.05502	0.908653	1.03376
52.92	0.971251	0.073852	0.957546	0.95118	0.869303	0.928268	1.09763	0.871932	0.972664	0.937134	0.957292	0.930444	0.980273	0.941723	1.00503	0.95736	0.874492	0.990784	1.08666	0.83759	0.870693	1.10832	0.980856	0.94914	1.06996	1.10989	1.00373	0.988174	1.01711	0.949844
53.06	0.972471	0.062581	1.05778	0.910723	1.0233	0.844097	1.06896	1.0069	0.965239	0.963039	0.892632	1.06561	0.955746	0.944275	0.94396	1.00368	0.94957	0.989452	1.03203	0.890839	0.958349	0.969169	0.94331	0.965331	0.888408	0.879568	0.971347	1.01828	1.04918	1.07841
53.2	0.954256	0.078639	1.02642	0.869906	1.03781	0.896407	1.01104	0.999154	0.927583	0.962243	0.850943	0.895141	0.962243	0.980809	0.966214	1.11084	0.909991	1.01883	1.02242	0.711981	0.920574	0.965679	0.898172	0.844017	1.02661	0.957015	0.971692	1.00412	1.02214	0.949155
53.34	0.961319	0.102653	1.00675	1.01446	1.06678	0.970362	1.13147	0.843679	0.903303	0.93444	0.890741	0.897552	1.02289	0.9149	0.911345	1.0442	0.986731	0.9312	1.01716	0.688178	0.903578	0.968437	1.00392	1.08036	1.11163	0.729762	0.94518	1.10774	0.938126	0.952055
53.48	0.956517	0.098584	0.962335	1.05661	0.940943	0.899504	1.0045	0.868863	1.10278	0.975387	1.07933	0.870633	1.00334	1.00374	1.00995	0.881998	0.872081	0.998167	1.11725	0.649743	0.992589	0.948308	0.943076	1.03513	0.863637	0.81128	0.894937	1.05668	0.996246	0.943425
53.62	0.95898	0.094826	1.01397	0.958123	0.983491	0.777892	1.04385	1.01429	0.89344	1.01219	0.904202	0.958938	0.904774	0.857889	0.990434	0.816918	1.03456	1.03966	1.21449	0.912658	0.834627	0.967143	0.924624	0.952498	0.984742	0.851432	0.907757	1.15836	0.954655	0.983837
53.76	0.974713	0.106321	1.05461	0.969326	0.874899	0.722443	1.08398	1.01852	0.960711	0.990725	0.753981	1.02272	1.11079	0.918413	1.04031	1.04267	0.914616	0.958752	1.12133	0.775813	1.00219	1.00602	0.958324	1.04218	0.999707	0.894303	0.863552	1.14456	0.974483	1.07204
53.9	0.965072	0.091324	0.994434	1.08087	0.949409	0.827652	0.94983	0.990511	0.86812	0.967574	0.864275	0.940784	1.01467	0.962704	0.895342	1.08294	0.899001	0.948444	1.09891	0.688643	1.04127	0.950804	0.988773	1.0934	0.967332	0.976066	0.880269	1.04421	0.972915	1.08285
54.04	0.988259	0.091431	0.993392	0.941265	1.09752	0.91763	1.03161	0.912803	1.02346	0.975065	0.899482	0.984586	1.1363	0.95003	1.05087	1.16639	1.01711	0.934425	1.08576	0.760639	0.910033	1.0054	0.894705	0.942547	1.07112	1.03768	0.862974	0.938297	1.13229	0.997861
54.18	0.976638	0.085061	0.97982	0.971607	0.935849	0.820774	0.974376	0.904608	0.992483	0.947798	0.89428	1.0602	1.00237	1.00633	1.0193	1.13078	0.944344	0.939752	1.00516	0.792982	0.992308	1.05255	0.933459	0.95701	1.14691	0.81089	0.964208	1.08988	1.03352	1.04232
54.32	0.953844	0.095804	1.05039	0.882333	0.923843	0.893264	1.02171	1.02818	0.892586	1.02527	0.82588	1.03324	0.998846	0.919516	0.909276	1.17012	0.95631	0.885087	1.06295	0.715035	0.78134	0.968535	0.91013	0.997853	0.957255	0.935148	0.865328	1.05043	1.03723	1.01055
54.46	0.959323	0.083102	1.05272	0.935492	0.894474	0.926407	0.994827	0.98848	0.972207	0.889521	0.872406	0.989403	1.04408	0.907158	0.883064	1.02961	1.04103	1.00174	0.880481	0.851752	0.736378	1.03146	1.0032	0.965952	1.00852	0.9031	0.908914	0.937744	1.08129	1.12964
54.6	0.945662	0.065531	1.04513	1.00581	0.917207	1.04686	0.817641	0.99729	0.921847	0.868847	0.861664	0.988113	0.999456	0.988492	0.927116	0.978356	0.980124	0.868922	0.903699	0.92522	0.9235	0.948868	0.974984	1.02145	0.968305	0.907573	0.772018	0.979496	0.974362	0.966197
54.74	0.955339	0.086355	1.05929	0.903321	1.021	1.03889	0.960845	1.00013	0.859474	0.986056	0.829209	1.12495	1.02449	1.00684	0.982355	0.905019	0.975292	0.949545	0.985743	0.796554	0.876898	0.95075	0.803663	0.921603	1.07996	1.06718	0.817885	0.995876	0.911978	0.914687
54.88	0.959116	0.08781	1.11648	1.00571	1.06687	0.989631	0.917222	1.00649	0.813902	0.8163	0.904622	1.03722	0.955495	0.988435	0.967151	0.975756	1.0135	1.00517	0.802272	0.885838	0.756496	1.07306	0.970325	0.964888	0.885572	0.928275	1.03668	0.969626	0.939181	1.0631
55.02	0.965152	0.091995	1.08312	0.983015	1.00556	0.825149	1.03124	0.870072	0.862645	1.08543	0.901912	1.12713	0.969418	0.874511	0.859904	0.841066	0.990849	0.989822	1.00269	0.93002	0.86599	1.08665	1.11825	0.908251	0.920158	0.944005	0.984505	1.04276	0.846926	1.07322
55.16	0.97026	0.094662	1.08344	0.921386	1.03613	0.895126	1.0889	1.11588	0.89836	1.09655	0.785785	1.00803	0.986925	0.894049	0.90729	0.879389	1.03637	0.964252	0.855122	0.874743	0.914652	1.13142	1.03398	0.911213	0.890742	0.948263	0.877701	1.13132	1.00714	0.993115
55.3	0.98205	0.084796	1.0713	0.881724	1.08775	0.896937	0.971486	0.891468	0.907469	1.02641	1.05117	1.01493	0.992274	0.906952	0.863387	0.909245	0.979557	0.981524	0.914228	0.784902	1.02516	1.04112	1.10779	1.09109	1.0483	0.992404	1.09887	1.05218	0.884273	1.02353
55.44	0.953275	0.097467	0.978196	0.881314	1.06638	0.633991	0.861452	0.988791	0.866001	1.06356	0.902361	0.943666	0.940141	0.912737	0.974893	0.808106	0.960723	0.9778	1.09553	0.875879	0.932679	1.09901	1.03739	0.970882	0.883745	0.974146	1.03964	1.04606	0.969337	1.0073
55.58	0.958941	0.095027	0.982789	0.791257	1.0846	0.84994	1.07832	1.01801	0.895983	0.926695	0.90371	1.04129	0.980646	0.946099	0.931216	0.963016	1.04964	1.03789	1.08118	0.688558	0.850263	0.974753	0.927523	0.924712	0.921001	0.903563	0.991986	1.12881	0.972129	1.00477
55.72	0.951963	0.089263	0.986458	0.966735	1.08272	0.861129	1.06558	0.802532	0.838623	0.92841	0.815131	0.888463	0.905597	0.923052	0.92558	1.0016	0.896204	1.04333	0.983261	0.784044	0.950916	1.03492	0.898713	0.9634	0.979566	0.919537	1.05161	1.03444	0.967576	1.15583
55.86	0.949607	0.100746	1.09454	0.91994	0.947308	0.726451	1.02981	0.91307	0.873116	1.0471	0.849624	0.951606	0.973128	0.930362	1.02637	1.11938	0.955287	0.910242	0.964627	0.676008	0.862313	0.949999	0.8955	0.911695	1.03771	0.886318	1.04565	1.06095	0.977481	1.05342
56	0.960944	0.099381	0.917204	0.93648	1.00115	0.730209	1.14253	0.950283	0.811176	0.989987	0.993466	0.969144	0.97921	0.947277	0.87818	0.883906	0.982868	0.941517	0.958802	0.955293	0.933676	1.06489	0.910687	0.985577	1.00888	0.806393	0.869483	1.19837	1.12297	1.03683
56.14	0.966729	0.085262	0.937888	0.901184	0.985911	0.8395	1.01936	0.985796	0.991674	1.0428	0.937247	0.978537	0.974557	0.975918	0.958595	0.860859	0.964376	0.950779	1.11854	0.770937	0.948567	0.992037	0.914795	0.855087	1.15143	0.952949	0.908305	1.15252	0.983062	1.01519
56.28	0.952856	0.086077	0.97236	0.953943	0.934538	0.693929	1.06709	0.997515	1.03586	1.00147	0.863768	0.995836	0.935022	0.993624	1.01013	0.965135	1.02992	0.852793	0.986842	0.771129	0.916024	1.05763	1.01614	0.969295	0.993384	0.904635	0.937452	1.03306	0.962443	0.829031
56.42	0.964001	0.095232	1.00589	0.939126	0.906556	0.875538	1.12764	0.970998	0.995682	0.878682	0.849305	1.0016	1.08617	0.917925	0.933743	1.06118	0.981109	1.05424	0.928829	0.710646	0.844922	1.09834	0.982336	0.956763	0.894228	0.846384	0.972262	1.02043	1.05488	1.09664
56.56	0.975699	0.078297	0.954474	0.871789	0.955825	0.798843	1.01252	0.936485	1.00584	0.877483	1.00357	1.09821	1.01695	1.00582	1.07306	1.00222	1.00245	0.904406	1.06913	0.848884	0.903928	1.0605	1.03098	0.909543	1.04762	0.896765	1.03978	1.06009	0.905462	1.02694
56.7	0.961112	0.092259	0.931607	0.924625	0.893076	0.802812	1.09961	0.923089	1.06445	0.984389	0.926156	0.972539	0.969127	0.949561	0.903592	1.00909	0.936925	0.950133	1.14406	0.888496	0.947765	1.02016	0.842656	1.04058	1.0782	0.835192	0.894583	1.15693	0.815801	1.00595
56.84	0.976653	0.102045	1.03073	1.02621	0.986725	1.0753	1.08914	1.00381	1.02031	0.949307	0.976228	1.08757	0.960535	1.05222	0.860253	0.993389	1.00104	0.944748	1.20173	0.704715	0.85401	0.971093	0.923613	0.920612	1.01863	0.801709	0.899755	1.11937	1.00276	0.870751
56.98	0.96269	0.089207	0.973942	0.931619	1.03362	0.814746	1.09067	1.03509	0.943564	0.975289	0.857369	1.00173	0.969167	1.06145	0.901299	0.855461	0.941902	0.942537	1.08367	0.794294	1.10932	1.05382	0.911914	0.977249	1.04308	0.948404	0.778704	1.03609	0.899686	0.989642
57.12	0.981978	0.077864	0.925177	0.931673	0.961803	0.81343	1.10625	0.983462	1.04596	0.870489	0.870789	0.979716	0.960273	1.03087	1.0029	1.00404	0.99511	0.992495	1.10002	0.844545	0.99538	1.11393	0.872702	1.06605	1.06897	1.01612	0.962246	1.02015	0.961542	0.999299
57.26	0.963283	0.095327	0.939931	0.966973	0.976394	0.703212	0.940698	1.00311	1.0886	1.08739	0.945435	1.02509	1.15542	1.01348	1.00963	0.934128	0.750419	1.00344	1.07731	0.964346	0.874928	0.921049	0.842152	1.01425	0.991158	0.904509	0.918828	0.98279	0.925176	1.0121
57.4	0.97904	0.085363	0.898112	0.896735	0.929242	0.768491	1.11267	0.990598	0.961158	0.950889	1.02493	0.994145	1.01388	1.04666	1.09859	1.16976	0.980592	0.974302	1.05002	0.939025	0.798236	1.03808	0.895914	0.988983	1.01557	0.967001	0.993092	0.995157	0.904722	1.01657
57.54	0.973466	0.093459	1.04843	0.873544	0.981569	0.698716	1.12418	0.956716	1.07117	0.87947	0.938786	0.943254	0.973168	1.00331	0.984001	0.982286	0.981238	0.954485	1.11093	0.855214	0.863739	1.01731	1.06604	0.960286	1.16742	0.974063	0.995376	0.906188	0.945951	1.00019
57.68	0.958145	0.067741	0.918814	0.991549	0.993285	0.791795	1.06116	1.00153	1.00675	0.954766	0.890712	0.920472	1.01099	0.973088	0.876398	1.051	1.00998	0.821015	0.998716	0.876881	0.935788	0.883613	0.972448	0.99933	1.01571	0.917156	0.959579	0.970178	0.965845	1.05952
57.82	0.941466	0.090726	0.923448	0.96197	0.867186	0.848107	1.08	0.896656	1.02908	0.973711	0.953541	1.00143	0.871445	0.965925	0.860329	1.15517	0.860703	0.927667	0.994324	0.737874	0.874729	0.968549	0.856527	0.954631	0.946792	1.0156	0.870805	0.938086	0.887986	1.13878
57.96	0.980323	0.091146	0.955093	1.09163	0.994071	0.980902	0.969957	1.14632	0.950117	1.02501	0.835755	0.865773	1.01049	0.954769	0.983984	0.957792	0.862213	0.967551	1.02061	0.836631	0.937829	1.00078	0.95801	0.972715	1.17176	1.20798	1.00434	0.936047	0.989539	0.861367
58.1	0.96226	0.077612	0.947504	0.968265	0.944747	0.939381	1.02466	1.04185	0.902277	0.944216	0.831138	0.909751	0.971915	1.06429	0.913485	1.02608	1.00591	0.981154	0.912393	0.687674	0.929447	1.01753	0.995044	1.0215	1.03687	0.94621	0.968443	0.981987	0.944532	1.08501
58.24	0.979465	0.107056	0.914926	0.859974	0.95725	0.957442	1.09959	0.916598	1.20135	1.03936	0.768622	1.01628	0.934658	0.997346	0.876169	0.989382	0.949066	0.944485	1.07301	0.915044	0.861986	1.26402	0.995525	0.898459	1.13974	1.07465	0.934625	0.955186	0.902883	0.987395
58.38	0.954866	0.089994	0.916738	0.905602	1.03839	0.78376	1.03325	0.946805	0.942656	1.00309	0.859891	1.03456	0.977471	0.914294	0.918921	1.07651	1.03451	0.900553	0.869624	0.837782	0.958924	1.17138	0.814565	0.895875	1.01974	0.904748	0.967364	0.902531	0.994656	1.11207
58.52	0.9689	0.077904	1.01287	0.888409	0.903457	0.884541	0.908508	1.04291	1.02069	0.98956	0.831897	1.03284	0.963244	1.03882	0.956874	0.818353	0.963256	0.963221	1.01838	0.943083	0.957241	1.19988	0.892855	0.95848	0.97942	0.995107	0.951894	0.910453	1.06776	1.0352
58.66	0.937834	0.070698	0.897483	0.922433	0.910031	0.904367	1.08855	0.99933	1.03159	0.891932	0.9271	1.02112	0.877777	1.01696	0.836472	0.778568	0.839334	0.894793	0.962228	0.904955	0.91303	1.01666	1.03953	0.99122	0.877958	0.980022	0.956543	0.951333	0.892134	0.935922
58.8	0.978891	0.064892	1.01899	0.872778	1.01921	0.942554	1.02246	1.03614	0.998809	0.952632	0.932904	1.07713	0.955877	0.915223	0.960544	0.876908	0.91733	1.09208	0.93989	0.820544	0.98905	0.993409	1.0257	0.979683	0.998966	0.952287	0.974029	1.09217	1.0107	1.04096
58.94	0.9435	0.096373	1.03063	0.897707	1.07779	0.854625	0.927092	1.03111	0.845375	0.902503	0.866873	1.0091	0.998114	0.917917	1.05118	0.928703	0.996328	0.996714	0.867052	0.810452	1.00844	0.950691	1.04468	1.06992	0.952473	0.726571	0.844135	1.12377	0.869632	0.818426
59.08	0.975639	0.082466	0.994164	0.951886	1.10888	0.808237	1.15007	1.04399	0.967407	0.973753	0.912037	1.10842	0.887588	1.0706	0.95883	0.960123	1.02999	0.974767	0.991725	0.934964	1.00161	0.977855	1.00245	0.933631	0.994801	0.901927	0.93334	1.03763	0.935929	0.771298
59.22	0.976864	0.091589	0.981726	0.938723	0.909363	0.794364	0.989686	1.15639	1.04085	0.925229	0.909452	0.992483	0.953068	1.03991	0.993854	1.06812	1.02053	0.864418	1.22719	0.823006	1.01421	1.03078	0.976443	1.00416	0.923278	0.890802	0.966765	1.06529	0.906652	0.945434
59.36	0.935852	0.071268	0.904011	0.926327	0.892267	0.849771	0.934466	0.957122	0.878848	0.9073	0.791723	1.07671	0.996932	0.929445	1.00214	1.05743	0.895923	0.948808	0.941815	0.820411	1.02686	0.956083	0.836519	0.957509	0.900106	0.965661	0.896562	1.04814	1.01421	0.890763
59.5	0.965785	0.081807	0.929369	0.946501	0.986148	0.890491	1.03631	1.09483	0.924834	0.911419	0.712402	0.939906	1.02795	1.03188	0.996561	0.999976	0.896025	0.986588	0.904446	0.894348	0.990215	1.02804	1.07841	1.04759	0.960874	1.01017	0.884397	1.10341	0.89731	0.931579
59.64	0.953222	0.099156	1.0368	0.9655	0.996073	0.920909	1.10512	1.08254	0.814489	0.931983	0.766828	0.915409	0.851698	1.0247	0.978391	0.90163	0.856504	0.945645	0.878242	0.755843	1.08193	0.912224	0.918323	0.895995	1.04758	0.97813	0.933869	1.17037	0.997	1.02651
59.78	0.974194	0.072002	0.970963	0.983705	0.934972	0.871203	1.09209	0.999095	0.928395	0.885246	0.921177	0.952889	0.989383	1.01604	0.900759	1.01269	0.905107	0.883237	1.08306	0.804155	1.09676	1.05214	0.971746	1.05627	0.960614	0.990262	0.999053	0.95032	1.05393	1.01217
59.92	0.990714	0.076328	0.970653	0.996546	0.916361	0.984278	1.17505	1.00381	0.889665	0.996625	0.915484	0.945034	1.01111	1.03733	0.9231	1.04273	0.81241	0.975645	1.07003	0.933393	0.917669	1.03366	1.09864	0.998234	0.93511	0.960038	1.00137	1.0927	1.1101	0.993238
60.06	0.96262	0.07309	0.968312	1.1078	0.959093	0.943521	0.954763	0.941003	0.856756	0.799774	0.933627	1.01385	0.983524	0.977694	0.997603	1.03155	0.910173	0.907117	0.907326	0.870445	0.937662	0.983798	1.04239	0.962687	1.05285	0.953121	0.83652	1.0822	0.970322	1.06788
60.2	0.955362	0.088334	0.957583	0.911593	1.02674	0.894667	1.13644	0.88249	0.865979	0.983862	0.914432	0.893454	0.904533	1.14463	1.04123	1.13553	0.956993	0.829889	1.01625	0.972885	0.968254	1.01273	0.907153	0.837639	0.949373	0.866211	0.900629	1.05426	0.917112	0.867584
60.34	0.966475	0.0748	0.974999	1.02524	1.03463	0.995978	0.921138	1.02995	0.992841	0.930228	0.968825	1.00059	0.983884	1.10629	1.02935	0.809805	0.958123	0.908774	0.866515	0.809256	0.878409	1.02	0.963483	0.970095	1.02261	1.04668	0.827379	1.01435	0.943038	1.02885
60.48	0.950049	0.07784	1.0174	1.03811	0.857986	0.762772	0.977831	0.915443	0.886151	0.949303	0.913147	0.872989	1.03385	1.01011	0.97546	0.96186	0.795761	0.929752	0.965714	0.964387	0.967561	1.02789	1.12746	0.947573	1.02002	1.02426	0.965701	0.928206	0.891763	0.872903
60.62	0.973574	0.080827	0.98697	1.04504	1.0754	0.781502	0.980524	0.924829	0.871953	0.939583	1.13956	0.893062	0.926869	1.01934	0.968431	1.00145	1.00829	0.967304	0.864556	0.964251	0.987671	1.06673	1.00871	0.885756	1.00337	0.928937	0.962934	1.15937	0.925973	0.97172
60.76	0.940267	0.079209	0.922049	1.01963	0.935929	0.830076	0.897533	0.967376	0.854052	0.928205	1.06618	0.969645	0.980515	1.03962	0.926859	1.10191	0.924133	0.909288	0.890237	0.719067	0.933379	1.07428	0.957385	0.920461	0.859578	0.901392	0.903645	0.992849	0.917587	0.984635
60.9	0.949969	0.076255	0.928825	0.940763	1.151	0.912681	0.964395	0.919151	0.906573	0.960993	0.900167	0.965698	0.974187	0.980114	1.1306	0.995831	0.875229	0.899315	0.921433	0.781582	0.904137	1.0059	1.04746	0.951741	0.963878	0.849131	0.91799	1.0041	0.874475	0.971801
61.04	0.955098	0.102609	0.968772	1.054	0.968153	0.884898	0.849068	0.967599	0.834331	1.13364	0.877184	1.08049	0.996411	1.01937	1.04923	1.05544	0.821247	1.07027	0.910617	0.720117	0.868412	0.854711	0.953802	1.03024	0.822574	0.966427	0.9634	1.13037	0.89843	0.993545
61.18	0.974141	0.084947	0.947574	0.997661	1.00739	0.919897	0.949111	0.963498	0.963911	0.912599	1.0452	0.996963	0.891977	1.01072	0.918957	1.13511	0.814366	1.03195	1.18246	0.857484	0.866103	0.991623	0.965187	0.879458	1.02395	1.06929	0.880325	1.01056	0.953247	1.08937
61.32	0.963083	0.084369	0.995189	1.04908	1.01005	0.8523	0.868709	0.823943	0.872814	0.930979	0.92882	1.02854	0.793627	1.01657	0.992651	1.0688	0.920454	0.882285	1.05896	0.974109	0.881716	1.07594	0.904875	0.872111	1.02744	1.0126	0.955892	1.03241	1.08665	1.04882
61.46	0.968466	0.09271	0.842107	1.05911	0.873426	0.841564	0.906817	0.896598	0.967777	1.09841	0.851698	0.962333	0.888627	0.984404	0.97166	1.0552	0.886694	0.999983	1.16679	0.852649	0.87941	1.08588	1.03895	0.977928	1.03249	0.856137	0.966519	1.07687	1.03154	1.06549
61.6	0.954389	0.090008	1.01899	1.01383	0.85009	0.881354	1.02316	0.859081	0.942735	1.0376	0.918786	0.874481	0.801889	1.02037	0.933913	0.965321	0.965238	0.840492	1.13133	0.99792	0.83976	1.06868	1.05948	0.939759	1.06787	0.897343	0.88729	1.09206	0.832914	0.961157
61.74	0.977776	0.084801	0.98468	0.916519	0.973505	0.914075	1.03164	0.896269	0.898275	1.0526	0.836639	1.02953	0.868456	1.04021	1.03885	0.910519	0.999179	0.927863	1.17613	0.935238	0.790406	0.973799	0.904468	1.05896	1.01563	1.05784	1.01203	0.991997	1.05997	1.08245
61.88	0.967783	0.055766	1.03019	0.941406	1.00209	0.908305	1.05479	0.992253	0.905398	1.05899	1.0032	1.02284	1.01114	0.986512	0.864807	1.00109	0.882287	1.01624	0.967102	0.832845	0.910828	0.949087	0.981166	0.957052	1.01644	0.948221	0.959936	0.971685	0.987293	0.934743
62.02	0.96227	0.091242	1.02228	0.945671	0.964105	0.800458	1.1639	0.937288	0.898222	1.05358	0.999368	0.965289	0.959561	1.02033	0.969377	0.895061	0.93219	0.877653	1.11895	0.746858	0.916711	1.06227	1.01163	1.02117	0.967124	0.820211	0.974674	1.05255	0.88379	0.963293
62.16	0.966265	0.086864	1.05696	0.860857	0.854999	0.964732	1.08411	0.94596	0.947295	0.994876	0.842468	1.04267	1.00668	0.87177	1.00596	0.843848	0.845428	1.07829	0.943109	0.85635	0.976797	1.05681	0.913459	0.892701	1.06688	0.917174	0.974992	1.01144	1.06893	1.12988
62.3	0.940738	0.101491	1.00185	1.10475	0.92284	0.927427	1.03731	0.807915	0.897282	0.879108	0.832012	0.911697	0.999363	0.938439	0.982046	0.815911	0.759785	0.999956	1.17332	0.853949	1.12448	0.945694	0.975488	0.900946	0.880409	0.890824	0.817321	1.0863	0.981288	0.892952
62.44	0.94648	0.090266	0.996366	0.964969	1.02374	0.812427	1.1326	0.916072	0.976343	1.03263	0.979134	1.06241	0.867408	1.03144	0.983789	0.90818	0.785722	0.902472	1.02154	0.803131	0.955065	0.910395	0.857416	1.06211	0.879113	0.88567	0.815753	0.970851	0.900569	1.06413
62.58	0.966264	0.068372	0.894592	1.0897	0.988605	0.947265	1.01353	0.941042	1.00485	0.970059	0.920822	0.901881	1.00317	1.01479	1.07151	1.03252	0.89545	0.906176	1.09702	0.894483	0.957935	0.969098	1.01397	0.936879	0.879472	0.955532	0.845386	0.930496	0.89876	1.08041
62.72	0.996082	0.109241	1.06342	1.04389	1.00306	1.01567	1.09559	0.868383	0.893914	1.06448	0.995664	1.03809	0.991549	1.11203	1.06499	1.17705	0.804516	1.07606	1.08243	0.753801	0.79566	1.13647	0.88654	1.01076	1.01339	0.977034	0.878693	1.13385	0.917714	0.995618
62.86	0.976221	0.0933	0.940318	1.14191	0.984814	0.945705	0.991594	0.88745	1.16559	0.930194	0.901192	1.03771	1.00395	1.03177	0.932935	0.991217	0.881947	1.06785	1.07755	0.735888	1.02437	0.921003	0.99286	0.945825	1.0303	0.931835	0.793366	1.06142	0.937623	1.04601
63	0.981757	0.097267	0.947674	1.01485	0.946074	0.909158	1.24602	0.903102	1.04898	0.886803	0.825891	0.974122	0.93815	1.05648	0.907209	1.11488	1.00215	0.921916	1.03702	0.846708	0.906658	0.906712	1.03529	0.971864	1.13026	0.894283	0.95797	1.03674	0.970148	1.1521
63.14	0.978432	0.094744	1.02309	1.0684	0.980018	0.860468	1.1629	1.08023	0.903344	0.974589	0.840128	1.00377	0.922842	0.947003	1.03128	0.807052	1.00876	1.04446	1.08619	0.765198	0.977309	0.978335	1.00541	0.830545	1.07277	0.952828	0.957333	1.02419	1.10168	0.985958
63.28	0.973775	0.102847	0.929057	1.03807	0.902	0.956877	1.21619	0.9883	0.979821	1.02277	0.838752	1.08032	1.07791	0.963902	0.950751	0.823815	1.03531	0.944404	0.799646	0.769698	0.842928	1.03529	0.978062	0.934723	1.05384	0.865152	1.07147	1.01981	1.06177	1.08506
63.42	0.959422	0.091033	0.922499	0.96837	0.937721	0.863374	1.27131	0.877109	0.918303	1.07664	1.04942	1.02094	0.979285	1.00609	1.02424	0.820136	0.815826	0.930389	0.884434	0.959092	0.964626	0.91812	0.910044	0.970011	0.998037	0.868532	0.883759	1.00554	0.987827	1.03214
63.56	0.960263	0.087561	0.990912	1.00522	0.951187	0.910456	1.1725	0.841256	0.965551	0.982066	1.00864	0.995204	0.930318	1.01764	0.93349	0.82997	0.844101	0.994346	1.04721	0.857241	1.00036	0.834294	0.956919	1.09562	0.983342	0.812101	0.937331	0.956102	1.11247	0.921508
63.7	0.982275	0.103464	1.08961	0.944912	0.886608	0.870172	1.03565	0.991366	0.796803	1.02126	1.02239	1.02599	1.06372	1.02024	0.9406	1.05622	1.01239	0.933227	0.977879	0.70451	0.999928	1.08235	0.956182	1.09028	1.1165	0.879316	0.782458	1.10916	1.0301	1.06385
63.84	0.970989	0.095552	1.00311	0.900706	1.09667	0.827805	0.892083	0.997265	0.937762	0.965596	0.940774	0.915098	1.07452	0.954183	1.03448	0.920963	0.980647	0.994304	1.1924	0.756939	1.05664	1.00701	0.991946	1.03417	1.06701	0.752563	0.904875	0.963084	1.0377	0.987375
63.98	0.953075	0.062798	1.05426	0.919474	0.95587	0.813668	0.978242	0.956963	0.891061	0.946169	0.878132	0.980442	0.914498	0.963019	0.927925	1.0407	0.920818	1.01439	0.962809	0.919339	0.902809	0.937763	1.08862	0.975869	0.997562	0.816101	0.9934	0.991835	0.936281	1.00809
64.12	0.930319	0.089421	0.934165	1.04038	0.934806	0.758071	1.07039	1.01002	0.768961	0.967916	0.864822	0.930443	1.00115	0.919969	0.900022	0.838875	0.932454	0.891016	0.971706	0.712548	0.928654	0.890321	0.941611	0.950766	1.03486	0.88923	0.962359	1.11611	0.926204	0.961106
64.26	0.963487	0.089456	1.06849	1.00986	0.973739	0.907668	0.908268	0.893873	0.809393	1.03626	0.950158	1.0528	1.10163	0.940794	1.0595	1.13593	0.960903	0.862328	0.991115	0.819885	0.85143	0.906287	0.910048	1.00142	1.10773	0.864414	0.884838	1.00187	0.932549	1.03447
64.4	0.959866	0.10061	0.882927	1.08085	0.934762	0.774788	1.03992	0.874739	0.908053	0.948094	0.965015	1.08291	1.08776	0.959514	0.883607	1.23462	0.859323	0.912281	0.958574	0.850877	1.04226	0.78182	0.996392	1.01734	0.915751	0.915255	0.957663	1.08625	0.987403	0.937487
64.54	0.948075	0.085018	0.922418	0.975316	0.869128	0.88768	1.11486	0.874925	0.968587	0.987056	0.967806	0.93483	0.963173	1.00555	0.882096	1.03871	0.947354	0.934938	0.946673	0.693293	0.884004	1.0003	0.98535	1.0747	1.01152	0.922051	0.858589	1.10453	0.892963	0.897697
64.68	0.984375	0.074299	0.944203	0.991554	0.973346	0.9326	1.05367	0.99999	0.890545	0.960612	1.00082	1.03518	0.983193	1.00406	0.89499	1.10422	1.05429	0.818582	0.97442	0.939166	0.956454	1.03851	1.16918	1.06699	0.957933	0.907101	0.907079	0.940793	1.08801	0.975022
64.82	0.980884	0.089695	0.932386	0.956269	0.964943	0.781198	1.08456	1.14844	0.988766	0.963142	0.980784	1.05689	1.02639	1.06724	0.83579	1.12796	0.803929	0.990543	1.02527	0.880896	0.883869	0.974846	0.990836	1.01314	0.930446	0.950711	0.97326	0.982043	1.10439	1.04581
64.96	0.951226	0.072102	0.854874	0.843501	0.873362	0.850313	1.00845	0.909298	0.918386	1.0281	0.989151	0.966348	0.884428	0.922859	1.02211	1.08651	0.996533	0.934864	0.952624	0.876017	1.08112	1.07688	0.880405	1.00806	0.919469	0.914836	0.907659	1.01177	0.913071	1.00334
65.1	0.96724	0.110679	1.02047	0.96748	0.83101	0.707234	1.07719	0.875863	0.96963	1.03483	0.929574	1.05771	0.928994	1.03559	0.920373	1.00327	0.968792	0.940137	1.3043	0.752353	0.945382	0.889688	0.959862	0.99651	1.09545	0.926042	0.980047	1.06935	0.954911	0.940689
65.24	0.958164	0.084572	0.923141	0.931946	0.895688	0.825181	1.08307	0.904382	1.02507	1.00891	1.01441	0.969653	0.946178	0.937877	1.02307	1.04375	0.988166	0.837901	1.09063	0.884799	0.974332	0.919086	0.960924	1.0644	0.859744	0.857782	0.921487	1.16399	0.844294	0.928719
65.38	0.980649	0.093321	0.925343	1.01407	1.0382	0.844299	0.8172	0.991353	0.990203	1.00015	0.946732	1.07941	1.01206	1.08427	0.913503	0.904893	1.074	0.842424	0.981398	0.882109	0.939907	1.11236	0.985251	0.938452	0.937613	0.908105	0.956046	0.976778	1.14565	1.21641
65.52	0.983834	0.073775	0.946149	0.949858	0.98918	0.832157	1.0157	0.933409	0.973304	1.03224	1.07684	1.00074	0.992007	0.941318	0.92881	0.974569	1.05918	0.878674	1.06361	0.9348	1.06682	1.09248	1.0454	0.991611	0.997788	0.89449	0.801721	1.03714	1.02905	1.0683
65.66	0.947635	0.104895	0.914366	0.922817	0.968712	0.725642	1.03673	0.859977	1.05068	1.03455	0.960533	0.903315	0.939062	1.01323	1.13933	0.873684	1.02797	0.866718	0.824722	0.684365	0.816887	1.09375	0.92377	1.02656	0.957883	0.962649	0.970119	1.06272	0.945599	1.02744
65.8	0.973466	0.089509	0.837872	0.903452	0.976252	0.830556	1.06114	1.04074	1.04041	1.0267	1.03565	1.02831	1.07157	0.945103	0.88674	0.951127	0.8933	1.01775	0.881583	0.885811	0.958252	1.1819	1.15931	0.886837	0.936856	0.874312	0.924811	1.00313	1.02612	0.991442
65.94	0.975941	0.094482	1.10097	0.921633	0.936653	0.742279	1.07829	0.915278	1.08851	1.15345	1.02064	0.953936	0.904072	1.04515	0.943548	0.989887	1.06339	0.898941	0.948849	0.831781	0.866822	1.04091	1.09331	0.968761	1.04265	0.846783	0.937458	1.0179	1.03524	0.939254
66.08	0.944221	0.08496	1.0215	1.00226	0.911277	0.851407	0.922462	0.973754	0.894766	1.05049	1.08628	0.905432	1.05879	1.03432	0.845974	0.971195	0.90919	0.958862	0.986324	0.785872	0.791776	1.08868	1.04811	0.892707	0.907868	0.862619	0.859528	0.89792	0.915505	1.00333
66.22	0.965785	0.090775	0.995388	0.912017	1.00909	0.750817	1.04411	1.03315	0.971614	0.990782	0.97175	1.11805	0.975912	0.990378	0.950629	0.959933	0.917574	1.05902	0.873625	0.705671	1.0595	1.03501	0.961209	1.05178	0.911156	0.939856	0.905719	1.04792	0.871269	1.02905
66.36	0.989497	0.112821	1.01179	0.869216	0.934955	0.740498	1.0994	0.991689	1.0058	1.08167	1.15443	1.03242	1.15605	0.956346	1.10276	1.14928	0.90734	0.981632	1.03073	0.810042	1.00246	1.21596	0.859676	0.917132	0.93688	0.933133	0.840915	0.952968	0.986307	1.04444
66.5	0.960586	0.103063	1.0633	0.839004	0.966427	0.748324	1.00582	1.09258	0.94407	1.01476	0.960203	1.11941	1.03064	1.01612	0.985289	0.885314	0.899065	1.00062	0.88174	0.754706	0.940008	1.1528	0.806436	0.961556	0.926385	0.852188	0.927326	0.981198	1.05568	1.08543
66.64	0.947353	0.075219	0.989607	0.897448	0.945199	1.02132	0.87739	0.908682	0.948665	0.996142	0.996423	0.887417	1.02081	1.04907	0.932478	0.945385	0.901449	0.946843	0.881883	0.748461	1.00625	1.07154	0.93907	0.960975	0.904425	0.925544	0.839579	0.958521	0.901771	1.12353
66.78	0.964815	0.077649	1.01106	0.807197	0.955633	0.921129	1.03064	0.937698	1.05017	0.970196	0.948426	1.10103	0.821512	1.01141	0.961973	0.91225	0.967962	0.960977	0.871014	0.849591	0.975234	0.990155	0.920552	0.963867	1.03336	0.846156	1.01656	1.05351	1.01915	1.10642
66.92	0.952972	0.097722	0.919765	0.954993	0.989909	0.858795	0.94951	0.867693	0.844485	0.909451	0.816077	1.04704	1.01692	0.908944	0.995159	1.02734	0.937255	0.936249	0.912666	0.831401	0.918046	1.14633	0.794267	0.9836	0.943212	0.885566	0.910728	1.05917	1.16646	1.15218
67.06	0.973022	0.092379	1.08522	0.92038	1.04609	0.852494	0.994331	0.978343	0.837698	1.04651	0.986551	1.03921	1.00117	1.01009	0.90396	1.14176	0.925791	1.04518	0.856149	0.736755	0.893075	0.962055	0.945896	1.13946	1.00953	0.871555	1.03714	0.966485	0.981267	1.03046
67.2	0.974288	0.081406	1.03888	0.962281	0.955544	0.836646	1.06698	1.09004	0.941687	0.976871	1.00797	0.931962	0.863297	1.00015	1.09601	1.06187	0.947078	0.994757	1.04985	0.79438	0.973183	0.979171	0.992746	0.981442	1.0011	0.92757	0.796922	0.933258	0.969473	1.10896
67.34	0.972465	0.113116	0.95166	1.00124	0.846738	0.840449	0.914931	0.969995	0.908796	0.983763	1.09214	1.05377	1.03635	0.976485	0.995908	1.28457	0.77257	0.995094	1.05428	0.742541	0.878897	0.986862	0.8997	0.990118	0.938412	0.946707	1.06048	0.937012	0.962634	1.20691
67.48	0.976449	0.088477	0.976614	0.9219	0.998534	0.75674	0.966425	0.923625	0.919193	1.01388	1.10595	1.03571	1.01379	0.923313	1.02481	1.17566	0.948727	0.951121	0.962289	0.845303	0.990062	1.02649	1.06706	0.945976	0.909399	0.864423	1.02875	1.08306	0.872011	1.08975
67.62	0.974913	0.092705	0.992319	0.973857	0.978697	0.835245	0.985313	0.943122	0.970885	1.02677	0.859096	1.01386	1.0517	0.992635	1.07704	1.02219	0.892602	0.874885	1.2162	0.836157	0.905635	1.06402	0.85358	0.924797	0.951847	0.928946	0.883076	1.10731	1.02065	1.11513
67.76	0.99253	0.068985	0.90012	0.961071	1.04833	0.872999	1.01905	0.909171	0.983901	1.05497	0.916235	1.0519	1.03983	0.998246	1.00413	1.04669	0.998417	0.978949	1.08541	1.01999	0.948999	1.10291	0.995818	1.02676	1.04445	0.957067	0.839567	1.05687	0.871419	1.05758
67.9	0.993575	0.089027	0.975864	0.934557	1.10386	0.953384	1.04437	0.973495	1.04339	0.931563	0.982738	1.19615	0.94124	0.948372	1.243	1.06011	0.912608	0.925948	1.10177	0.836652	0.974139	1.03069	1.03058	1.05001	0.951794	0.955505	0.95212	0.928834	0.903788	0.933578
68.04	0.961877	0.074189	0.994405	1.06932	1.01897	0.729657	1.0185	0.945739	0.95184	0.894532	0.936961	0.950992	1.01016	0.971577	0.930835	0.985252	0.813691	0.917447	0.978961	0.983945	0.960205	1.11422	0.912069	0.973591	0.953191	0.953487	0.917215	1.02568	0.961855	1.05826
68.18	0.984478	0.101845	0.994945	0.843769	1.03964	1.02171	0.977767	0.911549	0.932524	1.04839	0.921988	0.940742	0.975218	1.03757	1.0451	0.884894	0.9929	0.879312	0.780579	1.1273	1.00488	1.08524	1.25374	0.884312	0.987639	0.919774	1.00819	1.19707	0.940046	0.928599
68.32	0.995295	0.075388	0.921595	1.12778	0.954664	0.864999	0.932896	0.954123	1.02091	0.996174	0.91767	0.943174	0.972703	0.98549	1.15666	0.970503	1.036	1.00417	1.15671	1.01116	1.00959	1.07884	1.06041	0.894221	0.928136	0.922719	0.938251	1.04428	1.00263	1.06177
68.46	0.952469	0.091833	0.925435	0.901276	0.95084	0.76213	1.11612	0.995168	0.800797	1.03069	0.86071	0.992673	0.937269	0.989753	1.0498	0.848203	0.955408	1.01023	0.97906	1.04864	0.994666	1.11026	1.00475	0.855409	0.960544	0.861562	0.943831	1.08233	0.838447	0.863116
68.6	0.962419	0.086666	1.01167	1.00751	0.965036	0.813614	1.03487	0.856361	0.875813	0.947823	1.10707	1.09562	0.97296	0.990314	0.957734	0.950628	0.979441	0.858835	1.00673	0.917344	0.9465	1.03419	0.826372	0.935975	0.848552	0.89397	0.940349	1.03036	0.956407	1.18568
68.74	0.968212	0.08843	1.05891	0.96029	0.979177	0.725056	0.970001	1.15526	0.950572	0.92159	0.927125	1.09163	1.02956	0.906979	0.993536	0.845603	0.984991	0.847663	0.980928	0.891795	1.05955	1.01073	0.986047	1.01586	0.935728	0.898695	0.936655	1.02659	0.912933	1.10649
68.88	0.973093	0.080492	0.991482	0.929599	0.890204	0.814926	1.01099	1.07622	0.909254	0.878687	0.994456	1.01653	1.02292	1.02439	1.1303	0.994689	1.03687	0.927589	1.06977	0.909678	0.938883	1.10557	0.924216	0.966375	0.945363	0.895399	0.807407	1.0462	0.963056	1.02559
69.02	0.984284	0.101192	1.10853	0.88474	1.03139	0.767277	1.16853	1.05772	0.991789	0.964334	1.00592	0.874123	0.983262	0.970364	0.976138	1.02795	0.942746	0.948102	1.04074	0.896505	0.890733	1.0563	0.826605	1.03439	0.898411	0.945881	0.947123	1.12618	0.962547	1.23162
69.16	0.980262	0.096191	1.02159	0.931103	0.918258	0.907501	1.26288	0.924374	1.0218	1.05164	1.08874	1.00399	0.890895	1.01398	1.01709	0.960296	1.02159	0.97672	1.043	0.805538	0.910011	0.983804	0.917322	0.934626	0.839264	0.983164	0.858939	1.12386	0.921939	1.11343
69.3	0.975426	0.084111	1.01773	0.979246	0.918609	0.832151	0.997424	0.965495	1.00936	1.02198	0.99391	1.07726	0.933714	0.999735	1.06073	0.918433	0.913037	0.940732	0.95325	0.826744	1.03977	1.06952	0.939151	0.972555	0.884095	0.883514	0.828348	1.11685	1.13858	1.08
69.44	0.987468	0.06522	0.91562	0.971617	1.01467	0.916395	1.08324	0.972151	0.92962	1.09943	1.0162	0.942069	1.06491	0.992814	1.05309	0.915809	0.982132	0.964124	0.981914	0.947437	0.950226	1.11873	0.970936	1.03349	0.941013	0.878542	0.952057	1.10786	1.02191	0.911113
69.58	0.963052	0.090063	0.892807	0.975577	0.952385	0.892122	1.11333	0.909851	0.814993	1.10893	0.998697	0.958507	0.910495	0.935822	1.07701	0.988126	0.851099	0.932248	0.967686	0.693792	0.973741	1.02222	0.990163	1.03634	1.0221	0.923301	0.984833	0.951423	0.983684	1.10417
69.72	0.96406	0.079218	0.907306	0.897746	1.04785	0.890408	0.950555	0.905053	1.01666	0.967922	0.963442	1.02674	0.993329	1.00937	0.935269	1.17375	0.903007	0.946765	0.850422	0.829878	0.94218	0.918605	0.996268	0.977288	1.0147	0.948625	0.864428	1.14677	1.03771	0.931639
69.86	0.957603	0.087559	0.918465	0.950361	0.979968	0.726578	1.05461	0.950565	0.901252	1.00482	0.90688	1.02185	1.04982	1.097	0.994205	1.09993	0.840966	0.875663	0.907344	0.917567	0.925646	0.954337	0.906362	1.00275	0.863973	0.850068	0.940735	1.0553	1.05597	1.05989
70	0.965738	0.089049	0.931359	0.966386	0.953432	0.733239	1.05136	0.843163	1.12972	1.00384	1.05846	1.0246	0.918356	1.03108	0.922857	1.03608	0.95122	0.973397	0.967094	0.870791	0.911923	0.996819	0.982436	1.05777	0.863973	0.850068	0.940735	1.14226	0.912989	1.01526
Date: 18/10/2019	DELTA Mcph1
Report: Normalized Data using Double Method
Prebleach Values: 50
Bleach Values: 0
Postbleach Values: 450
Initial Deleted Values: 10
Time (seconds)	Mean Values	Standard Deviation	20190826 12.csv	20190826-101.csv	20190826-102.csv	20190826-103.csv	20190826-104.csv	20190826-11.csv	20190826-111.csv	20190826-13.csv	20190826-14.csv	20190826-15.csv	20190826-21.csv	20190826-22.csv	20190826-23.csv	20190826-31.csv	20190826-32.csv	20190826-33.csv	20190826-51.csv	20190826-52.csv	20190826-53.csv	20190826-54.csv	20190826-61.csv	20190826-62.csv	20190826-63.csv	20190826-64.csv	20190826-71.csv	20190826-81.csv	20190826-82.csv	20190826-91.csv	20190826-92.csv	20190826-93.csv
1.54	1.00396	0.069863	0.993535	1.02784	1.17348	1.04292	1.15989	1.07852	1.02248	1.02387	0.964265	0.954744	1.02066	0.962119	1.05302	0.963918	0.941489	0.998471	0.832604	0.981632	1.04002	0.935008	0.943702	1.06317	0.99752	1.01771	0.962159	0.931472	0.925857	0.983676	1.02554	1.09759
1.68	0.998577	0.065354	0.886816	0.93569	1.00361	1.00933	0.955969	1.07099	0.928505	0.936311	1.00654	0.98113	0.954407	1.05292	0.964919	0.934794	1.0158	0.993997	0.900755	1.01964	0.994617	0.99376	0.953571	1.144	0.914856	1.03216	1.04345	1.03416	1.00465	1.08808	1.16008	1.04179
1.82	0.995737	0.076364	1.05408	1.13062	0.973902	0.89512	1.09089	0.917434	1.06286	0.972364	1.0042	0.914026	0.959135	0.945169	0.997897	0.994558	1.0909	0.971195	0.963904	0.948646	0.903617	0.973623	0.954073	1.03651	0.897013	1.00444	0.943911	1.01409	1.05194	0.992954	1.2483	0.964732
1.96	1.00879	0.041932	1.00137	0.939984	1.09237	0.995371	1.02091	1.03893	1.0133	1.10767	0.965395	0.998266	0.993382	0.996651	0.966478	0.965201	1.01697	1.05222	0.980892	0.968144	0.993992	1.01737	1.07745	0.954773	1.03376	0.982566	1.05471	1.02587	1.0494	0.951483	0.980702	1.02805
2.1	0.984989	0.069945	0.977676	0.973556	1.03563	0.987053	1.12868	1.095	0.968898	0.956054	1.05326	0.778736	1.006	1.01374	0.990016	1.03011	1.0793	0.960404	0.869564	0.921965	0.917197	0.959367	0.983856	1.02242	0.99249	0.988022	0.953308	0.979549	0.981788	0.872131	1.00489	1.069
2.24	0.994855	0.067656	1.0377	0.979059	0.908103	0.92669	0.959202	1.06564	0.968431	1.11101	1.03008	1.11064	0.986223	0.99102	1.02321	0.902221	1.05122	0.97136	0.958251	1.1051	0.861152	0.979714	1.0088	0.954765	0.940203	1.08832	1.0329	0.944874	0.981684	0.970638	1.09947	0.897959
2.38	1.00079	0.052155	0.992108	0.923472	1.01595	0.976433	1.12825	0.93023	1.00069	1.0306	1.05244	1.04032	1.01123	0.974639	1.03278	1.03019	0.979251	1.101	0.98723	0.966713	1.01606	0.876598	0.993071	1.0435	0.946666	1.00664	1.0134	0.987124	1.07014	0.939044	0.960189	0.997657
2.52	0.995427	0.059997	1.05789	0.98025	1.01304	0.98031	1.08934	1.08218	0.955635	1.00193	0.905913	0.921504	0.980985	0.924622	1.0413	0.900397	1.03839	1.02913	0.929501	1.08558	0.992944	0.906022	1.0071	0.960417	0.905419	1.0523	0.996038	0.956326	1.02315	1.00772	1.10453	1.03297
2.66	0.989725	0.060784	0.856463	0.966707	1.04394	1.04537	0.856402	1.01196	0.986779	1.02863	1.00219	0.97581	0.989578	1.04857	1.0418	0.915938	1.06841	1.00474	1.0226	1.04161	1.07445	0.875821	0.956027	0.969736	1.03108	0.94457	0.933975	0.986919	1.04811	0.993011	0.91871	1.05182
2.8	0.995895	0.052283	0.998609	1.05898	1.04465	0.920521	1.10342	0.959761	1.04185	0.956285	0.975986	1.02018	1.01068	1.00995	0.944769	0.997176	1.06285	0.925845	0.838526	1.01051	0.963747	1.01182	0.988167	1.04174	0.958012	0.998749	1.06628	1.01562	0.987746	0.985532	0.959425	1.01947
2.94	1.00645	0.071545	1.0109	1.1026	0.987594	0.968407	1.193	0.811736	0.923108	1.06453	0.95319	1.05581	0.980288	0.952913	0.982166	1.15001	0.986529	0.986202	0.952991	1.0193	1.00708	1.01061	0.984666	1.01241	1.01487	0.966403	1.05334	1.03999	1.0086	0.916769	1.08958	1.00803
3.08	0.988406	0.077723	0.925067	1.08637	1.08171	1.03569	1.08131	0.96662	0.9039	0.875377	0.982774	0.996985	1.01687	0.980896	0.92334	0.938518	0.935359	1.0405	0.743071	0.981104	1.10808	1.09579	1.00596	1.02418	0.967253	1.02584	0.959467	1.09191	0.95091	0.933494	0.959889	1.03393
3.22	0.982189	0.069935	0.860744	1.01265	0.98508	0.860768	0.831462	0.936303	1.08543	0.917473	1.04834	0.855718	1.04778	1.02156	1.02024	0.956769	1.08065	0.998667	0.917537	1.03786	1.0554	0.963329	0.955915	1.0162	0.968402	0.997522	0.993367	1.06317	0.919711	1.06711	0.990333	1.00016
3.36	0.998339	0.057823	0.934582	0.88854	0.985073	1.11786	1.00698	0.920104	1.03451	1.00941	0.953319	0.971334	1.00879	0.935958	0.975556	1.0371	1.0997	1.05732	1.01954	0.980941	1.06866	1.02656	0.912043	1.09111	0.992007	1.04273	1.03183	1.006	1.0093	0.95008	0.913393	0.969806
3.5	0.982716	0.056717	0.918632	0.871109	0.984212	0.994247	1.00558	1.0656	1.05856	1.01853	0.985638	0.916102	1.04094	1.00712	0.948367	1.11702	1.0389	0.968485	0.871457	0.990739	0.987109	0.91701	1.01326	0.955792	0.954716	0.967417	0.945383	1.05309	0.914773	0.993074	0.972816	1.00581
3.64	1.00297	0.056437	0.941279	1.04286	1.07321	1.08371	1.01475	0.914959	1.02696	0.996364	1.01059	1.05351	1.03444	0.98678	0.966022	0.878723	0.971226	1.077	1.06666	1.03126	0.990146	0.999721	1.03373	0.948344	0.984489	0.972199	0.881482	1.04831	1.01273	0.964983	1.10579	0.976784
3.78	0.991334	0.06508	0.924979	0.934196	0.994131	1.08874	0.869409	0.933953	1.13635	1.05781	1.02971	0.866467	1.04526	1.0448	1.01027	0.945414	0.998582	1.01522	0.999306	0.985256	1.01078	1.00628	1.09746	1.01842	0.975346	0.908537	0.892238	0.995341	1.04084	0.989914	0.928051	0.99696
3.92	0.992236	0.053816	0.961541	0.917924	0.972598	1.10487	1.02098	0.893358	0.996243	1.00568	1.00808	1.0016	1.04999	1.01702	0.961983	0.927409	0.976185	1.10215	0.97538	0.967834	0.948753	1.00563	0.955765	0.959146	1.05449	1.01057	1.01945	1.08866	1.01027	1.0017	0.886714	0.965124
4.06	1.01058	0.067064	1.16808	1.01739	1.02977	0.960027	0.914848	0.982583	1.04444	0.974417	0.984754	1.05838	0.992648	0.945614	0.999448	1.03884	0.896792	1.08777	1.19745	0.890799	1.04482	1.00667	1.01273	1.01361	0.966489	0.982351	1.00205	1.02458	1.03445	1.08708	0.956178	1.00244
4.2	1.0128	0.070028	1.04019	1.01077	1.17342	0.975504	1.08302	1.13011	0.96256	0.981627	1.02782	0.825673	1.03564	0.946998	1.02435	1.12332	1.02574	1.02657	0.881571	0.960991	1.04696	1.10308	1.01045	0.94688	0.990328	0.995908	1.05044	1.01681	0.966437	1.00515	1.03266	0.983017
4.34	0.987651	0.052784	1.02041	0.903251	0.97063	0.984909	0.936673	1.02303	0.980061	0.958029	1.06611	0.925055	1.01608	1.05252	0.989123	1.02742	0.991408	1.03888	0.887831	0.981568	1.00151	0.948649	1.01029	0.976037	1.05821	0.985186	1.04979	0.934245	1.07556	0.872154	0.943569	1.02135
4.48	1.00572	0.065699	0.950031	1.06052	0.935467	0.992195	0.926836	0.991359	1.04386	0.990911	0.934568	1.13576	1.0303	1.02421	1.02731	1.09704	0.906454	0.985569	1.02473	0.971259	1.05872	1.01178	1.09326	0.95957	1.04955	1.00385	0.848463	0.94097	0.97148	1.13028	1.04498	1.03026
4.62	1.01636	0.066714	1.06309	0.947475	0.991562	0.903614	0.878304	0.988303	0.997199	0.989185	1.0488	1.20395	0.944437	0.997198	1.02648	0.973204	1.027	0.95326	1.08575	1.00169	1.02012	1.04073	1.04876	0.981186	1.05157	1.01105	1.09153	0.947385	1.11148	1.00988	1.0357	1.12103
4.76	0.995055	0.058109	1.01392	1.02908	1.00076	1.04171	0.87557	1.08301	0.992768	0.984521	0.939572	1.00599	1.00602	0.990846	0.99062	1.0404	0.971513	0.948544	0.917597	1.10734	0.867667	1.04259	1.02355	0.889438	1.07216	1.07809	1.02044	0.99067	0.992892	0.977485	0.994491	0.962416
4.9	0.978174	0.053977	0.93779	1.0441	0.859965	1.05593	0.854985	1.0533	0.991483	0.961048	0.9879	0.957897	0.899325	0.925209	1.02285	0.960832	0.957389	1.0474	0.958992	1.05471	0.975426	1.03182	0.963934	1.01546	1.01613	1.01402	0.911809	0.985594	0.95795	0.961378	1.01563	0.964966
5.04	1.00648	0.077602	1.15625	0.950868	0.89147	1.02235	0.885433	1.07096	1.027	1.02571	0.951528	0.801524	0.935026	1.08119	0.990957	1.02073	0.989545	1.0827	1.1705	0.940151	1.02735	1.03608	1.00466	0.988156	1.07023	0.9936	1.0388	1.00814	1.02446	0.951827	1.10364	0.953593
5.18	1.00141	0.076981	1.15474	1.01457	0.911175	0.994164	1.05838	0.91193	0.956921	1.0867	0.980392	1.07179	0.936185	0.944251	0.993101	1.06033	0.959155	1.04564	1.18617	1.04151	1.02949	0.992825	1.02322	0.960157	1.04533	1.00358	0.82542	0.946796	0.976901	1.09658	0.897144	0.937627
5.32	1.01574	0.071367	0.990793	1.05899	1.02117	1.10077	0.990917	1.06537	0.995635	0.960243	1.06252	1.15399	1.01862	1.06432	0.931531	1.04146	0.925921	0.884658	1.19473	0.986831	1.08692	0.95832	0.930702	1.00471	1.04145	1.01627	1.04197	0.992653	0.937305	0.959177	1.11273	0.94168
5.46	0.988638	0.054677	1.01509	0.841369	0.950112	1.0022	0.867117	1.04981	0.99873	1.05106	0.958016	0.883893	1.00254	0.996171	1.01808	0.981045	0.933642	1.06466	0.999023	1.02964	1.0112	1.02922	1.05096	0.994156	0.981514	0.945546	1.03909	0.97626	1.05985	0.981246	0.963387	0.984522
5.6	1.00255	0.041388	1.01499	0.986805	1.01148	1.04139	1.0091	1.03436	1.02667	0.990833	0.993316	0.962926	0.981626	1.03149	0.9782	1.00456	0.99617	0.965784	1.07815	1.06043	1.03457	1.03516	0.970529	1.03217	0.951349	0.94881	0.934358	0.920467	0.984686	1.08951	0.963646	1.04306
5.74	1.01146	0.067584	1.02341	1.07204	0.981921	0.949449	1.06012	0.923067	0.915558	1.08607	0.864846	1.05658	0.969063	1.00134	0.923518	1.08865	1.01011	0.965893	1.1963	1.01421	0.978231	0.947062	0.989927	1.06627	1.08649	0.996731	1.0252	1.05323	1.07141	1.04648	1.01682	0.963904
5.88	1.00547	0.070963	0.855711	1.02465	0.932776	1.12877	0.98886	1.07794	0.988462	1.01718	0.981951	1.14699	1.03446	0.957606	0.994033	1.02414	0.988539	0.983226	1.05484	1.04423	0.901944	1.0946	0.981812	1.07446	0.957394	1.0787	1.09506	0.973849	0.9334	0.965324	0.863357	1.01976
6.02	0.996056	0.057222	1.03306	0.900892	1.04776	1.06846	1.06503	0.928689	0.918266	1.01501	1.10549	0.92693	1.03061	1.00995	0.983713	1.06566	0.989847	0.953262	1.0568	1.00256	1.04732	1.04098	0.925804	0.963578	0.934382	1.00509	0.945779	1.01947	0.978529	1.02777	1.00931	0.881681
6.16	1.01579	0.064365	1.05712	1.04853	1.00871	0.927913	1.09451	0.937138	0.987989	0.973447	0.947846	1.2187	0.955789	1.05639	1.09525	1.02093	0.958535	0.908505	1.01984	1.00768	1.05103	1.00022	0.974672	1.03941	1.06429	1.06158	1.05066	0.970696	1.00597	1.02862	0.929212	1.07239
6.3	1.00812	0.070281	1.05448	1.13402	1.05435	0.946147	0.99152	1.08667	1.0498	0.938785	1.15927	1.0837	0.996974	1.00744	0.978793	1.08592	0.959422	0.94179	0.79025	0.960424	0.915264	0.993956	1.0008	1.02071	1.01913	1.0211	1.02141	0.999323	1.01598	1.0569	0.995921	0.963476
6.44	1.00577	0.061032	1.06418	1.13494	1.07828	1.01956	0.995945	1.04875	1.07458	0.968162	1.0268	0.9658	0.995515	0.996931	0.96069	0.979229	1.046	0.831763	1.02591	1.02792	0.906192	0.988128	1.00917	0.99625	1.02763	0.995314	0.955408	0.988614	0.963051	1.14008	1.01112	0.951099
6.58	1.01909	0.052585	1.00076	1.02154	0.924491	1.03165	0.961191	0.974489	1.01575	0.983948	1.04807	1.00281	0.993544	1.08723	1.09587	1.02893	1.03194	1.00211	1.18345	0.993929	0.973809	1.01195	1.01279	0.976074	1.03802	0.979223	1.13093	1.04183	1.03664	0.965734	1.03876	0.985102
6.72	1.01973	0.069789	1.16913	0.995421	0.924346	0.901358	1.08532	0.965741	1.04591	1.10018	1.03407	1.14576	1.01617	0.986998	1.03889	1.00283	0.977662	1.02932	1.19492	0.94416	0.98949	1.02457	1.06754	0.947766	1.04352	0.982217	1.0537	0.924246	0.957025	1.01766	1.00653	1.01945
6.86	0.99541	0.070862	0.985499	1.11949	0.971922	0.958833	0.999499	0.946181	0.923094	0.920001	0.991044	1.03186	1.02583	0.966361	1.0024	0.930956	1.02546	0.996281	1.02352	0.921222	1.11677	1.18554	1.00602	0.953032	1.05476	0.935116	1.04103	0.972906	0.91785	1.02836	0.83829	1.07317
7	0.998854	0.0584	0.918528	0.994287	0.974846	0.920909	0.988336	1.06505	0.952461	0.970226	0.982777	1.02425	1.05491	1.05631	1.07889	0.850635	1.00317	1.00633	1.02753	1.0009	0.984075	0.924308	1.0666	0.990865	0.975306	0.962696	1.1098	1.11104	1.04577	0.992088	0.957718	0.975026
7.14	0.245091	0.10223	0.067037	0.116052	0.434861	0.335702	0.177184	0.141977	0.335924	0.213931	0.200496	0.314755	0.147971	0.225513	0.258504	0.201158	0.274841	0.220736	0.285625	0.485831	0.438643	0.240337	0.271171	0.264453	0.202263	0.096777	0.29127	0.328543	0.193896	0.182246	0.313259	0.091779
7.28	0.250972	0.09582	0.110162	0.238087	0.229274	0.255172	0.241798	0.32857	0.394987	0.153998	0.2834	0.324861	0.143592	0.21412	0.161245	0.224562	0.214868	0.276653	0.334909	0.392817	0.445987	0.272038	0.218827	0.194681	0.239603	0.149056	0.135621	0.489604	0.143584	0.213862	0.340783	0.162446
7.42	0.260088	0.110863	0.089629	0.072957	0.393435	0.258791	0.16317	0.259838	0.428355	0.219088	0.140747	0.436752	0.139137	0.242166	0.229488	0.234741	0.285907	0.328717	0.22331	0.487192	0.515118	0.240855	0.229151	0.236949	0.255502	0.22884	0.236831	0.403847	0.289048	0.150442	0.232958	0.149676
7.56	0.267333	0.123335	-0.114425	0.178576	0.412673	0.287772	0.281098	0.35487	0.50987	0.177723	0.247624	0.393518	0.206096	0.307065	0.261961	0.236269	0.281378	0.285013	0.26089	0.371918	0.517712	0.279646	0.158787	0.194383	0.209949	0.174298	0.305171	0.459858	0.205082	0.205354	0.237175	0.132691
7.7	0.277659	0.108465	0.127766	0.145966	0.449647	0.229574	0.199974	0.415529	0.434531	0.20501	0.167333	0.381656	0.209692	0.240889	0.243956	0.229489	0.313287	0.282994	0.379549	0.468624	0.431895	0.42591	0.189095	0.238238	0.288901	0.20457	0.243696	0.39885	0.2694	0.135038	0.293033	0.085665
7.84	0.308907	0.12765	0.061462	0.139869	0.592334	0.445547	0.364252	0.453629	0.428212	0.153238	0.192782	0.45361	0.236371	0.237483	0.264882	0.323788	0.326587	0.324545	0.355062	0.405807	0.532146	0.377886	0.287031	0.274984	0.187891	0.196561	0.210967	0.467367	0.184269	0.236214	0.378912	0.173531
7.98	0.289116	0.113411	0.103583	0.168356	0.320542	0.309805	0.191633	0.397554	0.562297	0.121696	0.16756	0.353142	0.217876	0.267151	0.42694	0.276718	0.260387	0.302723	0.246819	0.394757	0.558715	0.290136	0.331553	0.327012	0.227763	0.282213	0.208217	0.445711	0.231749	0.232987	0.311633	0.136238
8.12	0.271406	0.12488	-0.075749	0.091818	0.355446	0.259329	0.240804	0.310702	0.455692	0.345141	0.231031	0.353566	0.219338	0.221889	0.288561	0.360641	0.175939	0.289397	0.100957	0.478337	0.516665	0.316638	0.305447	0.210692	0.209777	0.202951	0.25646	0.511739	0.221356	0.285971	0.224264	0.177374
8.26	0.297403	0.126386	0.095873	0.176362	0.429119	0.364812	0.209617	0.303709	0.452514	0.143413	0.177427	0.425447	0.285339	0.225728	0.402662	0.269582	0.262407	0.431255	0.365109	0.479784	0.616384	0.366747	0.290474	0.313075	0.284516	0.19377	0.124261	0.460103	0.158218	0.177588	0.269497	0.167308
8.4	0.325762	0.1403	-0.067901	0.044705	0.551154	0.322663	0.450652	0.347383	0.521174	0.268538	0.231172	0.516216	0.29742	0.242707	0.240067	0.151215	0.331432	0.361507	0.323423	0.445632	0.519016	0.433808	0.352166	0.365949	0.235944	0.279992	0.335156	0.498675	0.333631	0.270403	0.39428	0.174695
8.54	0.299162	0.136744	-0.025333	0.137134	0.452107	0.433043	0.219925	0.241738	0.524685	0.219107	0.296953	0.364185	0.209733	0.285872	0.398457	0.257933	0.223144	0.262017	0.445318	0.581843	0.530637	0.426598	0.290836	0.25032	0.195876	0.1971	0.215832	0.473636	0.239865	0.194529	0.290345	0.141438
8.68	0.313197	0.12263	0.055141	0.257457	0.443845	0.31387	0.202647	0.251224	0.535519	0.299922	0.230257	0.264534	0.27309	0.291155	0.412847	0.283461	0.289529	0.354489	0.258397	0.490857	0.63793	0.356245	0.378444	0.304493	0.241535	0.235707	0.174385	0.529408	0.217938	0.257513	0.379753	0.174328
8.82	0.328317	0.119233	0.222574	0.184382	0.571559	0.369518	0.343322	0.311935	0.540889	0.237487	0.23854	0.264904	0.194445	0.326254	0.305995	0.34027	0.345847	0.410153	0.414771	0.45399	0.546712	0.42541	0.267732	0.374531	0.275224	0.317576	0.194782	0.479492	0.191843	0.180889	0.414509	0.103982
8.96	0.311156	0.11436	0.117034	0.235129	0.494271	0.341793	0.362266	0.387359	0.408802	0.25297	0.227433	0.366998	0.315785	0.262314	0.364176	0.305167	0.200948	0.303643	0.322315	0.475854	0.591687	0.415002	0.196545	0.325628	0.234795	0.262394	0.238364	0.490979	0.295891	0.109221	0.307095	0.12284
9.1	0.314985	0.11687	0.087767	0.233997	0.532489	0.340204	0.266505	0.419077	0.498411	0.166251	0.236415	0.397909	0.174123	0.239868	0.389851	0.32425	0.186633	0.336954	0.282784	0.492129	0.528749	0.39396	0.306058	0.274064	0.322843	0.266297	0.175608	0.47287	0.294852	0.226885	0.384721	0.197035
9.24	0.315374	0.105332	0.080645	0.217178	0.485001	0.393062	0.23663	0.413197	0.447741	0.321042	0.25535	0.41947	0.305938	0.241588	0.420742	0.208732	0.298058	0.292869	0.280071	0.485248	0.483615	0.246808	0.326818	0.345098	0.275164	0.28083	0.283374	0.500465	0.271662	0.235749	0.277289	0.131784
9.38	0.336795	0.147945	0.139496	0.031988	0.524563	0.20642	0.204494	0.484734	0.521189	0.353055	0.258558	0.474783	0.199633	0.332915	0.293082	0.306392	0.292217	0.366531	0.515359	0.475509	0.580808	0.351949	0.295072	0.329912	0.278541	0.19771	0.158295	0.561627	0.265082	0.302791	0.61856	0.182598
9.52	0.313777	0.124516	0.065032	0.139588	0.493894	0.366891	0.342954	0.220022	0.420116	0.28366	0.329539	0.41808	0.219305	0.309979	0.313996	0.29805	0.268992	0.420961	0.270782	0.516174	0.581619	0.323177	0.327559	0.268693	0.330261	0.331613	0.135634	0.548204	0.238528	0.186421	0.330248	0.113331
9.66	0.342378	0.129686	0.186914	0.161402	0.465755	0.366828	0.299662	0.318732	0.645961	0.303443	0.286181	0.477651	0.239802	0.328005	0.408556	0.24373	0.276062	0.526694	0.515383	0.478193	0.497447	0.310502	0.308227	0.260234	0.238343	0.271867	0.143965	0.524036	0.27094	0.26441	0.489059	0.163352
9.8	0.319669	0.14563	0.106459	0.037787	0.564642	0.299304	0.206744	0.339307	0.539948	0.298328	0.217356	0.404528	0.298125	0.330754	0.440589	0.333929	0.289479	0.457068	0.063943	0.479589	0.676144	0.267069	0.324373	0.251796	0.236962	0.244603	0.333877	0.542508	0.319459	0.230629	0.258738	0.196031
9.94	0.355284	0.137174	0.128682	0.244783	0.533663	0.312196	0.252304	0.438466	0.585632	0.38871	0.175145	0.70598	0.204342	0.299024	0.367025	0.326433	0.371767	0.440634	0.312221	0.420957	0.616888	0.35644	0.27297	0.311902	0.263416	0.313599	0.323834	0.493826	0.233788	0.385787	0.44517	0.132931
10.08	0.320401	0.112761	0.181136	0.202497	0.423001	0.410073	0.453213	0.207534	0.49226	0.307767	0.263684	0.398002	0.252464	0.317527	0.41978	0.191496	0.270055	0.387561	0.364595	0.512832	0.496748	0.373539	0.295184	0.32207	0.192009	0.222906	0.22321	0.549692	0.215867	0.196164	0.292699	0.17647
10.22	0.345941	0.120777	0.260313	0.14017	0.543554	0.36959	0.358263	0.282244	0.610561	0.218871	0.313218	0.399865	0.32339	0.361414	0.385545	0.39478	0.281259	0.404827	0.404115	0.410615	0.607011	0.309873	0.319024	0.220342	0.301787	0.262393	0.230519	0.578047	0.254864	0.262728	0.41608	0.152966
10.36	0.340788	0.136562	0.120321	0.138912	0.608317	0.397511	0.355293	0.263753	0.515693	0.311236	0.199999	0.43306	0.235434	0.320354	0.436937	0.377688	0.266518	0.525228	0.200785	0.496693	0.616136	0.382098	0.423815	0.392149	0.219113	0.242156	0.250588	0.537748	0.253744	0.245226	0.277299	0.179829
10.5	0.333165	0.130166	0.155351	0.220084	0.64757	0.462848	0.194062	0.406993	0.481329	0.219291	0.250609	0.36588	0.260455	0.288141	0.405024	0.243316	0.3058	0.392091	0.40628	0.488588	0.513716	0.372467	0.317927	0.372591	0.281803	0.209832	0.140924	0.599918	0.225831	0.284287	0.332071	0.149879
10.64	0.338923	0.130225	0.000779	0.205916	0.283728	0.537518	0.265399	0.424953	0.649144	0.279317	0.267847	0.434785	0.257442	0.266143	0.314229	0.304745	0.28076	0.424311	0.501136	0.415984	0.540275	0.3334	0.366522	0.250637	0.29651	0.258622	0.34662	0.456149	0.27914	0.301006	0.479963	0.144713
10.78	0.337598	0.128459	0.179882	0.227055	0.564431	0.321249	0.275709	0.321793	0.512681	0.382947	0.16055	0.424027	0.255026	0.218055	0.369283	0.368243	0.215902	0.418561	0.398405	0.47139	0.631904	0.39546	0.312766	0.26332	0.321882	0.246144	0.300371	0.524844	0.235478	0.284148	0.466457	0.059987
10.92	0.34946	0.129504	0.090418	0.27171	0.462499	0.133076	0.275131	0.540657	0.491316	0.296377	0.307628	0.498338	0.290144	0.292383	0.341893	0.207913	0.365862	0.403841	0.417824	0.618566	0.513898	0.34417	0.350479	0.310088	0.210245	0.332416	0.29541	0.635763	0.307928	0.33587	0.341989	0.199966
11.06	0.355013	0.115555	0.040909	0.328229	0.415852	0.458967	0.405415	0.397755	0.53746	0.257014	0.228389	0.403492	0.371372	0.281049	0.35864	0.291173	0.26035	0.459786	0.340337	0.532772	0.629896	0.395435	0.359946	0.292076	0.258332	0.309212	0.330792	0.483199	0.422121	0.24705	0.340147	0.213228
11.2	0.345844	0.130011	-0.015567	0.200407	0.437087	0.474651	0.435466	0.310265	0.383014	0.307841	0.297692	0.693151	0.264949	0.299195	0.402827	0.306126	0.328915	0.443964	0.259731	0.418781	0.499079	0.474087	0.323366	0.404393	0.243573	0.264528	0.259862	0.543932	0.292557	0.33555	0.315595	0.170302
11.34	0.357584	0.123714	0.103475	0.284624	0.62228	0.314807	0.254511	0.432962	0.56525	0.32934	0.300341	0.397734	0.239224	0.331366	0.286219	0.405799	0.278471	0.287774	0.462525	0.547445	0.473185	0.433323	0.39052	0.341938	0.251989	0.319241	0.178111	0.571332	0.393113	0.305688	0.449696	0.175234
11.48	0.34348	0.144983	0.085986	0.272128	0.548893	0.437188	0.219755	0.178251	0.443698	0.29101	0.228462	0.654703	0.248448	0.302581	0.44054	0.276468	0.336038	0.367342	0.319956	0.4592	0.617813	0.386647	0.382115	0.333897	0.361646	0.16682	0.207473	0.605597	0.335695	0.220317	0.466289	0.109439
11.62	0.339556	0.12272	0.102436	0.270671	0.368262	0.305201	0.159699	0.436839	0.591831	0.243579	0.156501	0.477088	0.348237	0.284285	0.42896	0.251474	0.333096	0.363625	0.345687	0.511397	0.498527	0.354266	0.319769	0.273173	0.366046	0.294349	0.27444	0.637112	0.330968	0.255501	0.406271	0.197393
11.76	0.366107	0.096716	0.189826	0.317905	0.384268	0.367388	0.331128	0.452198	0.51304	0.410049	0.240998	0.536503	0.331834	0.359505	0.342468	0.385205	0.372129	0.376601	0.394923	0.46903	0.533214	0.406234	0.452267	0.245611	0.355298	0.255032	0.282695	0.516321	0.27482	0.236118	0.437027	0.213579
11.9	0.365223	0.131303	0.137342	0.317252	0.464281	0.528008	0.275546	0.2165	0.523888	0.404335	0.236156	0.65026	0.316012	0.328802	0.501596	0.44701	0.215243	0.427486	0.221287	0.561631	0.592183	0.315986	0.349439	0.302448	0.35539	0.306084	0.266007	0.529467	0.356663	0.244963	0.364159	0.201255
12.04	0.368494	0.139321	0.150148	0.231295	0.433036	0.429899	0.187375	0.411167	0.489953	0.315599	0.254134	0.692355	0.34244	0.259015	0.31765	0.394868	0.299972	0.408534	0.478536	0.553257	0.634702	0.525654	0.320273	0.25334	0.373638	0.26248	0.275845	0.580036	0.266741	0.353146	0.434434	0.125294
12.18	0.350716	0.116976	0.149249	0.151915	0.545829	0.323742	0.216856	0.428681	0.509107	0.341324	0.284118	0.483823	0.309935	0.436537	0.366485	0.349786	0.12524	0.44534	0.323812	0.344069	0.623116	0.371823	0.398951	0.343529	0.278526	0.307797	0.257386	0.477101	0.334575	0.327915	0.447641	0.217274
12.32	0.377234	0.144657	0.13522	0.16137	0.373019	0.246371	0.276867	0.361815	0.561787	0.426787	0.324422	0.583289	0.375818	0.406989	0.383766	0.344595	0.342136	0.385602	0.348771	0.57144	0.837754	0.460979	0.307094	0.266186	0.337572	0.255402	0.393897	0.578554	0.319718	0.265987	0.48135	0.202461
12.46	0.355857	0.121563	0.218506	0.406132	0.487802	0.24112	0.176428	0.368616	0.528597	0.211467	0.222914	0.508723	0.232313	0.382905	0.389298	0.330974	0.272136	0.44991	0.32713	0.528475	0.582701	0.398503	0.324088	0.429839	0.321504	0.193943	0.294821	0.535264	0.353678	0.340491	0.482679	0.134738
12.6	0.344124	0.126376	0.128084	0.127919	0.574888	0.313418	0.308098	0.355629	0.568228	0.266153	0.24082	0.414161	0.389019	0.339906	0.420811	0.243499	0.331893	0.406467	0.502432	0.506417	0.516634	0.362903	0.314129	0.217673	0.361063	0.282528	0.208673	0.541053	0.26496	0.194418	0.432697	0.189138
12.74	0.353801	0.122995	0.163186	0.101711	0.590592	0.279794	0.191874	0.296219	0.44105	0.420571	0.309897	0.525077	0.278872	0.33265	0.400586	0.327146	0.225514	0.311542	0.520978	0.493097	0.581716	0.356015	0.381078	0.32573	0.361154	0.376739	0.328251	0.553622	0.278642	0.288953	0.375698	0.196087
12.88	0.370536	0.126074	0.133455	0.242457	0.667647	0.423508	0.235136	0.281671	0.547237	0.422106	0.241504	0.503691	0.291221	0.41674	0.443315	0.325373	0.331962	0.455312	0.432898	0.414244	0.626232	0.442169	0.349423	0.307995	0.36068	0.296765	0.247747	0.478129	0.355086	0.246418	0.438136	0.157817
13.02	0.386242	0.138274	0.098273	0.322176	0.62502	0.431848	0.281547	0.240596	0.561267	0.377192	0.290769	0.640573	0.273609	0.368298	0.406311	0.38596	0.350458	0.532885	0.451357	0.519882	0.654454	0.390408	0.400914	0.416866	0.351344	0.245397	0.209932	0.55841	0.268227	0.378924	0.378933	0.17544
13.16	0.37454	0.135356	0.126188	0.213548	0.546777	0.573717	0.520109	0.301538	0.532608	0.272969	0.203694	0.615192	0.269819	0.378794	0.457793	0.354542	0.346727	0.448263	0.386398	0.478852	0.622049	0.477154	0.300222	0.32102	0.258508	0.257316	0.319845	0.468602	0.362948	0.202775	0.436578	0.181661
13.3	0.380407	0.150115	0.189984	0.290576	0.379005	0.466701	0.407932	0.3215	0.615453	0.275818	0.307121	0.800294	0.292378	0.332602	0.466918	0.278272	0.24435	0.47506	0.305943	0.553455	0.707429	0.410998	0.315911	0.364282	0.444055	0.309484	0.157802	0.484395	0.340491	0.215316	0.475834	0.182864
13.44	0.383316	0.142281	0.067626	0.141613	0.592021	0.234198	0.470895	0.340459	0.59445	0.430554	0.238256	0.60565	0.310454	0.309312	0.488137	0.353863	0.361926	0.474299	0.538769	0.509379	0.598817	0.420425	0.370465	0.300048	0.306378	0.303376	0.238039	0.507608	0.337096	0.290856	0.541161	0.22334
13.58	0.37548	0.13877	0.119948	0.14413	0.433269	0.385764	0.249237	0.475632	0.594815	0.372484	0.182016	0.374672	0.305117	0.348452	0.522968	0.335996	0.345738	0.506729	0.410569	0.504651	0.636489	0.364413	0.322119	0.301314	0.437829	0.345765	0.31282	0.690186	0.343814	0.335888	0.446344	0.115222
13.72	0.379588	0.132288	0.272723	0.164492	0.630941	0.436829	0.552782	0.316027	0.528203	0.289014	0.25578	0.528859	0.360082	0.334004	0.430918	0.282868	0.247137	0.632111	0.335575	0.456466	0.638202	0.340531	0.307457	0.346548	0.351691	0.344843	0.274345	0.595282	0.320507	0.318125	0.274572	0.220738
13.86	0.355284	0.130202	0.080948	0.243809	0.363842	0.456455	0.246991	0.184854	0.456575	0.388593	0.339592	0.576422	0.334061	0.408828	0.431314	0.288788	0.357884	0.435365	0.285157	0.502842	0.633085	0.341026	0.393691	0.331258	0.289477	0.256912	0.224701	0.608878	0.39876	0.206856	0.43704	0.154523
14	0.370787	0.128981	0.093508	0.240115	0.639333	0.347286	0.398621	0.471012	0.54225	0.514618	0.24368	0.452705	0.354888	0.293734	0.422867	0.279238	0.30584	0.422181	0.440724	0.598514	0.582622	0.393427	0.289364	0.27325	0.323974	0.265913	0.229028	0.497702	0.32731	0.263685	0.405597	0.210623
14.14	0.387899	0.144863	0.257381	0.108259	0.658119	0.347215	0.296587	0.409955	0.57752	0.450198	0.2793	0.540484	0.421169	0.435794	0.414327	0.392066	0.332667	0.423801	0.228769	0.576559	0.783193	0.427293	0.394709	0.31345	0.308315	0.225961	0.22402	0.542706	0.407814	0.339186	0.300892	0.219247
14.28	0.383238	0.139682	-0.00172	0.256418	0.469201	0.384001	0.323061	0.510007	0.621568	0.434692	0.297244	0.462536	0.44186	0.276012	0.496163	0.398856	0.270369	0.54022	0.237713	0.53151	0.662677	0.421443	0.373119	0.31091	0.350932	0.331922	0.229263	0.605118	0.352093	0.264878	0.389671	0.255405
14.42	0.357495	0.120258	0.177415	0.230949	0.455197	0.320749	0.321972	0.29617	0.522454	0.25125	0.205289	0.505534	0.278704	0.372418	0.419328	0.26115	0.322514	0.46625	0.28608	0.619302	0.615597	0.479346	0.346923	0.414409	0.293936	0.264415	0.384687	0.498078	0.333144	0.250124	0.361242	0.170237
14.56	0.380208	0.123223	0.175682	0.255026	0.699924	0.49828	0.334295	0.376675	0.511397	0.335631	0.295619	0.468535	0.395012	0.366688	0.466346	0.391634	0.27156	0.496571	0.420379	0.527121	0.553227	0.363993	0.394491	0.324387	0.234727	0.315952	0.259931	0.552878	0.406149	0.252046	0.298875	0.163195
14.7	0.371164	0.118947	0.199206	0.288885	0.462147	0.342885	0.302076	0.358629	0.512362	0.463009	0.321295	0.572041	0.355438	0.306114	0.553126	0.291998	0.26672	0.422846	0.433222	0.602487	0.605004	0.377183	0.341978	0.370361	0.231993	0.314945	0.284085	0.493387	0.341993	0.250697	0.335793	0.13302
14.84	0.382963	0.150201	0.238926	0.263009	0.475916	0.347759	0.260346	0.478201	0.480517	0.401473	0.283712	0.837584	0.315522	0.364087	0.47604	0.312756	0.323407	0.389935	0.420787	0.52131	0.522931	0.434011	0.292275	0.311185	0.282969	0.330051	0.188996	0.503234	0.404127	0.193449	0.714602	0.119769
14.98	0.399287	0.150096	0.271453	0.280473	0.751576	0.421632	0.228041	0.257276	0.611918	0.462507	0.15007	0.764572	0.34736	0.416868	0.351684	0.293318	0.423195	0.395327	0.399228	0.496635	0.618072	0.353237	0.299526	0.37667	0.300287	0.304034	0.367561	0.599856	0.458486	0.349684	0.44895	0.179123
15.12	0.399159	0.154618	0.055881	0.082828	0.66114	0.475836	0.327903	0.359997	0.490087	0.385282	0.256667	0.676353	0.364457	0.373758	0.519777	0.283927	0.347269	0.506858	0.518961	0.404196	0.744516	0.370507	0.394514	0.316386	0.413956	0.294464	0.32273	0.626279	0.403963	0.390286	0.392845	0.21314
15.26	0.409809	0.140079	0.419573	0.201076	0.59659	0.577692	0.249103	0.380566	0.535929	0.470554	0.24142	0.666015	0.263795	0.326474	0.447759	0.235718	0.318207	0.470262	0.492524	0.434668	0.723956	0.447856	0.32585	0.368057	0.303418	0.365388	0.274868	0.626699	0.367049	0.377615	0.553416	0.232165
15.4	0.364461	0.135685	0.097779	0.144026	0.37298	0.321852	0.272774	0.40401	0.591941	0.479975	0.269308	0.46951	0.33247	0.446093	0.534905	0.326	0.257823	0.450101	0.589225	0.495106	0.619666	0.37669	0.289265	0.321098	0.388666	0.269645	0.40452	0.509599	0.292752	0.248668	0.181432	0.175955
15.54	0.401511	0.141239	0.176397	0.168122	0.651238	0.385252	0.393151	0.28013	0.558308	0.467707	0.223019	0.547805	0.450704	0.370651	0.476766	0.354181	0.2659	0.544906	0.310781	0.618971	0.72215	0.396335	0.398284	0.308959	0.273344	0.298395	0.439395	0.560921	0.303811	0.398193	0.468958	0.232611
15.68	0.381422	0.131573	0.219296	0.347774	0.506305	0.385114	0.293343	0.406703	0.495241	0.399525	0.226804	0.642656	0.271147	0.399333	0.496931	0.300296	0.236891	0.558485	0.329681	0.657716	0.517396	0.388555	0.371243	0.293732	0.359156	0.289392	0.296231	0.6013	0.304224	0.221004	0.471254	0.15593
15.82	0.392843	0.140485	0.188795	0.19306	0.578362	0.35413	0.413919	0.321352	0.704708	0.333708	0.20469	0.585537	0.381174	0.345858	0.440132	0.352057	0.273829	0.514705	0.321131	0.54004	0.676058	0.441606	0.378494	0.438845	0.362349	0.353739	0.253843	0.558535	0.332208	0.32746	0.476735	0.138217
15.96	0.401176	0.121739	0.384629	0.290261	0.55296	0.499902	0.318351	0.377007	0.600758	0.424118	0.281228	0.485254	0.281504	0.29259	0.461239	0.3664	0.34544	0.576913	0.350874	0.590576	0.660366	0.338375	0.509464	0.263727	0.3528	0.352278	0.35393	0.543647	0.35576	0.238537	0.417726	0.168675
16.1	0.386893	0.145057	0.188402	0.195961	0.390225	0.467828	0.362048	0.517652	0.661542	0.387457	0.183729	0.324283	0.399626	0.38871	0.456887	0.162109	0.348156	0.629076	0.415019	0.574331	0.62558	0.284435	0.413792	0.337993	0.281956	0.293186	0.204282	0.57488	0.388974	0.355717	0.593392	0.199565
16.24	0.386742	0.140258	0.019501	0.190816	0.64103	0.290894	0.268102	0.34197	0.538084	0.47718	0.253905	0.52783	0.456172	0.363021	0.418683	0.312022	0.273667	0.543631	0.453384	0.510178	0.60873	0.444878	0.423895	0.385982	0.422679	0.291357	0.226918	0.59166	0.333237	0.318069	0.44965	0.225141
16.38	0.389145	0.130647	0.294149	0.115896	0.581164	0.260806	0.433122	0.445462	0.603528	0.395162	0.250968	0.581689	0.450061	0.282599	0.351239	0.235415	0.304546	0.477278	0.407283	0.591661	0.673633	0.366364	0.427245	0.42662	0.291979	0.346994	0.291545	0.495409	0.383672	0.365827	0.341192	0.201855
16.52	0.406513	0.139881	0.224852	0.243313	0.633595	0.476992	0.370778	0.376432	0.522172	0.385848	0.245996	0.658874	0.352546	0.365922	0.441121	0.235719	0.274832	0.465007	0.339006	0.562331	0.68544	0.51593	0.359618	0.480607	0.296895	0.306995	0.209276	0.681611	0.383647	0.458893	0.388763	0.252374
16.66	0.394861	0.151694	0.076683	0.200877	0.643559	0.479552	0.374612	0.558376	0.555805	0.308459	0.303354	0.421651	0.386059	0.252218	0.506412	0.241108	0.290327	0.577939	0.377575	0.580285	0.625079	0.454701	0.418613	0.368291	0.376097	0.346411	0.08537	0.620129	0.342057	0.370046	0.493592	0.210585
16.8	0.39394	0.146495	0.17604	0.191067	0.751649	0.298085	0.373775	0.523529	0.490748	0.48445	0.305304	0.385181	0.293217	0.309178	0.422057	0.292703	0.293077	0.562353	0.258286	0.538999	0.729347	0.473144	0.343055	0.372923	0.400765	0.330506	0.335381	0.64338	0.310637	0.284391	0.438365	0.206598
16.94	0.392085	0.136863	0.21126	0.202359	0.606798	0.371512	0.269949	0.410935	0.498335	0.523412	0.228905	0.634214	0.343092	0.404253	0.47579	0.278566	0.294038	0.584436	0.28485	0.400591	0.780037	0.391968	0.368694	0.325149	0.363082	0.42626	0.288804	0.471738	0.369299	0.308743	0.438226	0.207261
17.08	0.390939	0.131144	0.039103	0.150432	0.471998	0.40937	0.27848	0.531712	0.453861	0.442467	0.245126	0.571852	0.312977	0.365945	0.505696	0.327752	0.337742	0.550329	0.394151	0.491856	0.630447	0.379265	0.34999	0.449044	0.41034	0.390517	0.30033	0.609418	0.363175	0.305745	0.430544	0.228509
17.22	0.403343	0.168513	0.242746	0.214582	0.779	0.223985	0.440338	0.587551	0.578335	0.416261	0.254276	0.630883	0.404761	0.321998	0.433343	0.312065	0.280417	0.631349	0.236494	0.537632	0.729369	0.455333	0.353286	0.305808	0.364555	0.323191	0.124658	0.535802	0.29841	0.345659	0.567903	0.170285
17.36	0.396832	0.145049	0.13815	0.156405	0.510259	0.369546	0.252875	0.581282	0.61914	0.391606	0.304973	0.521743	0.349277	0.355038	0.572837	0.279583	0.379492	0.462164	0.473999	0.614133	0.68485	0.355667	0.380642	0.443134	0.318402	0.300668	0.201109	0.510331	0.333901	0.366714	0.527976	0.149076
17.5	0.381468	0.14689	0.329852	0.038477	0.633231	0.300694	0.169467	0.438428	0.645058	0.384684	0.261285	0.566764	0.308563	0.351484	0.462347	0.275609	0.195404	0.385715	0.321051	0.492312	0.556934	0.527355	0.443495	0.289221	0.411212	0.401858	0.276709	0.559157	0.367236	0.384119	0.534847	0.131465
17.64	0.384835	0.120248	0.287262	0.122189	0.447962	0.519802	0.39384	0.449875	0.47912	0.489853	0.385135	0.52839	0.303515	0.276726	0.409203	0.311539	0.238409	0.433055	0.423176	0.563423	0.625227	0.38579	0.424706	0.409046	0.346075	0.333011	0.143194	0.517295	0.33319	0.298818	0.468919	0.197316
17.78	0.402211	0.141601	0.07804	0.183093	0.545024	0.42796	0.391143	0.519059	0.509658	0.489617	0.295486	0.598479	0.343068	0.38473	0.552598	0.375377	0.275493	0.437774	0.154378	0.61117	0.679973	0.409616	0.404946	0.298195	0.420809	0.420239	0.385238	0.533311	0.420988	0.264523	0.466822	0.189533
17.92	0.400849	0.147418	0.119313	0.142782	0.65794	0.519879	0.432279	0.397943	0.535351	0.378354	0.328901	0.687672	0.366807	0.379567	0.544227	0.354122	0.454973	0.530986	0.315341	0.503446	0.664834	0.378322	0.381221	0.315843	0.438935	0.267097	0.241253	0.533667	0.283032	0.304627	0.431731	0.135035
18.06	0.421759	0.138749	0.140701	0.356252	0.669042	0.395852	0.502452	0.588864	0.628854	0.453628	0.322114	0.459463	0.400706	0.450129	0.426677	0.412636	0.351468	0.450249	0.248313	0.58507	0.740246	0.503107	0.405732	0.373137	0.324736	0.349877	0.213553	0.581298	0.384962	0.375732	0.382224	0.175705
18.2	0.39779	0.12903	0.28741	0.142944	0.459019	0.257645	0.372016	0.398461	0.52208	0.507406	0.195697	0.616882	0.484146	0.369193	0.601637	0.40668	0.320058	0.463439	0.460551	0.611306	0.634763	0.299392	0.304465	0.309981	0.390244	0.408794	0.292672	0.540927	0.340615	0.327894	0.392282	0.215111
18.34	0.394328	0.142373	0.267947	0.217208	0.690324	0.33275	0.414253	0.500539	0.600681	0.545223	0.2935	0.594413	0.347359	0.401357	0.551808	0.348925	0.314081	0.506249	0.246136	0.548073	0.61161	0.310821	0.417389	0.310579	0.374066	0.390657	0.124284	0.437125	0.369911	0.177123	0.399596	0.18585
18.48	0.386946	0.132226	0.182708	0.283149	0.556962	0.433467	0.396896	0.526	0.473619	0.489851	0.293817	0.570985	0.36906	0.288513	0.416862	0.321782	0.295054	0.472163	0.360214	0.456042	0.55579	0.428885	0.375715	0.233951	0.322402	0.329496	0.333817	0.646297	0.229242	0.234924	0.617127	0.113584
18.62	0.411673	0.134111	0.312383	0.183018	0.574552	0.460614	0.307877	0.443025	0.581221	0.508109	0.200492	0.526116	0.392444	0.371846	0.440149	0.316381	0.341785	0.46556	0.413632	0.670412	0.65493	0.446322	0.359198	0.287854	0.317936	0.30038	0.405364	0.667432	0.414169	0.350281	0.476708	0.159988
18.76	0.410018	0.144404	0.126275	0.135403	0.530404	0.496832	0.278741	0.391543	0.595828	0.463538	0.312506	0.582062	0.355421	0.425755	0.524373	0.328325	0.359999	0.561925	0.405031	0.657045	0.696709	0.470256	0.346825	0.367192	0.476115	0.344548	0.333155	0.552599	0.352486	0.30501	0.401227	0.123425
18.9	0.41775	0.149768	0.073872	0.356592	0.626675	0.38085	0.305257	0.577472	0.597207	0.38145	0.205484	0.621995	0.35873	0.308612	0.496909	0.258655	0.378824	0.51896	0.538576	0.619904	0.703525	0.299551	0.344145	0.372645	0.403687	0.395748	0.367781	0.628071	0.382847	0.387205	0.460819	0.180452
19.04	0.386691	0.131524	0.241234	0.213577	0.466413	0.392443	0.450835	0.422205	0.515051	0.407199	0.251063	0.683853	0.384726	0.332988	0.485245	0.227485	0.300981	0.477553	0.342265	0.627131	0.675874	0.208457	0.349959	0.355147	0.385311	0.412227	0.331363	0.54286	0.31228	0.234404	0.34319	0.227411
19.18	0.403105	0.121933	0.234075	0.1869	0.467427	0.453572	0.180453	0.565639	0.650055	0.519062	0.27835	0.481974	0.40334	0.392729	0.347861	0.36264	0.323228	0.500967	0.507129	0.512243	0.584047	0.437171	0.408592	0.439369	0.292258	0.316117	0.332083	0.606291	0.363889	0.354008	0.346261	0.245435
19.32	0.410818	0.12924	0.275043	0.141842	0.492203	0.590439	0.455507	0.578232	0.571134	0.509276	0.240629	0.535448	0.422958	0.355199	0.337951	0.309683	0.34103	0.333321	0.367771	0.561055	0.709497	0.429902	0.412583	0.374663	0.420272	0.393294	0.447206	0.574246	0.345109	0.295203	0.292122	0.211732
19.46	0.395389	0.114804	0.229112	0.220702	0.549732	0.473316	0.221281	0.453681	0.562002	0.504305	0.312242	0.574836	0.406359	0.388449	0.45559	0.240377	0.311893	0.395568	0.405581	0.595461	0.581922	0.429463	0.342465	0.283475	0.262673	0.341488	0.398714	0.49733	0.365285	0.327927	0.458257	0.272197
19.6	0.406692	0.136257	0.19373	0.196106	0.498526	0.566917	0.291529	0.452453	0.57757	0.371058	0.267732	0.504452	0.339479	0.443724	0.493711	0.475074	0.340094	0.492928	0.562295	0.558958	0.689937	0.39732	0.338095	0.247692	0.376309	0.361493	0.300837	0.65047	0.455784	0.276666	0.282679	0.197131
19.74	0.384109	0.143508	0.253872	0.120731	0.433071	0.294589	0.33005	0.337995	0.534847	0.497118	0.28539	0.44405	0.316359	0.325865	0.451747	0.317931	0.226091	0.480235	0.572094	0.567166	0.624348	0.461272	0.351417	0.31669	0.339572	0.300283	0.246735	0.642859	0.345876	0.28039	0.684985	0.139639
19.88	0.417695	0.133897	0.181634	0.288587	0.457413	0.36549	0.54148	0.408021	0.516772	0.405256	0.211322	0.835601	0.411546	0.36104	0.516966	0.395148	0.35029	0.481859	0.434943	0.500648	0.726962	0.434169	0.374611	0.349649	0.409078	0.449273	0.263016	0.478027	0.354148	0.3769	0.418788	0.232204
20.02	0.421053	0.13361	0.256491	0.194895	0.438564	0.504057	0.342398	0.492023	0.632049	0.428972	0.216922	0.544863	0.330453	0.385584	0.441428	0.344523	0.405379	0.592648	0.471147	0.604667	0.723344	0.340948	0.485186	0.242352	0.341032	0.448617	0.257655	0.565623	0.417123	0.380088	0.55415	0.248425
20.16	0.407573	0.157908	-0.037883	0.194144	0.468503	0.493747	0.420049	0.425043	0.538489	0.499057	0.260612	0.550484	0.367882	0.332915	0.494761	0.270238	0.335814	0.442242	0.777349	0.563365	0.691453	0.46671	0.410426	0.229095	0.402704	0.384445	0.334901	0.563245	0.355424	0.418421	0.389221	0.184331
20.3	0.41932	0.113335	0.21823	0.190792	0.445096	0.383104	0.397662	0.439218	0.584014	0.34163	0.355094	0.579784	0.343586	0.445012	0.551863	0.365329	0.35829	0.473587	0.334568	0.468742	0.694141	0.467096	0.401453	0.379457	0.400221	0.476069	0.360133	0.542603	0.369345	0.345291	0.607843	0.260363
20.44	0.412765	0.132937	0.144745	0.226879	0.458819	0.348724	0.520539	0.381419	0.615834	0.406482	0.318069	0.514483	0.559672	0.327186	0.460838	0.293925	0.328883	0.544077	0.401603	0.52747	0.640475	0.436879	0.312092	0.398622	0.282154	0.364441	0.384123	0.585467	0.385864	0.39149	0.665601	0.156079
20.58	0.439293	0.14576	0.199758	0.191788	0.642997	0.42536	0.282902	0.599282	0.586787	0.443351	0.331886	0.67228	0.375239	0.360975	0.508339	0.363666	0.410836	0.55246	0.550554	0.58152	0.70904	0.459954	0.427786	0.389522	0.452135	0.321766	0.332846	0.524106	0.40951	0.306389	0.625769	0.139983
20.72	0.40215	0.120525	0.16502	0.281122	0.521151	0.401467	0.436631	0.353887	0.598048	0.461555	0.313393	0.557263	0.332287	0.262239	0.389118	0.312185	0.411912	0.485997	0.481805	0.553746	0.638395	0.439915	0.365371	0.357449	0.421565	0.307313	0.277838	0.547332	0.344056	0.289467	0.560153	0.196815
20.86	0.416879	0.147818	0.110103	0.128172	0.631038	0.331649	0.216922	0.479675	0.454031	0.472497	0.351164	0.641785	0.396686	0.421284	0.494849	0.498967	0.249564	0.509422	0.48258	0.602283	0.676941	0.394038	0.45149	0.37526	0.368912	0.364383	0.351696	0.589301	0.360849	0.363708	0.581293	0.155817
21	0.4296	0.135052	0.261038	0.207509	0.611959	0.406572	0.434171	0.567008	0.557606	0.434344	0.294	0.646818	0.385046	0.414939	0.506993	0.391996	0.355057	0.414217	0.657095	0.518933	0.622541	0.472954	0.36742	0.303059	0.349669	0.401468	0.324811	0.639778	0.336676	0.2639	0.56635	0.174085
21.14	0.41532	0.168554	0.009696	0.250667	0.688731	0.513609	0.327899	0.453537	0.453902	0.441588	0.317523	0.672527	0.420451	0.376678	0.455885	0.447871	0.338054	0.496314	0.423031	0.498285	0.79622	0.476644	0.331263	0.273785	0.28339	0.484102	0.175109	0.620407	0.362157	0.319246	0.624597	0.126431
21.28	0.409466	0.125263	0.165517	0.246109	0.453419	0.394045	0.317622	0.460057	0.563409	0.471565	0.314624	0.451337	0.472136	0.440542	0.493051	0.36439	0.361081	0.603434	0.380967	0.541295	0.612449	0.488612	0.371309	0.337179	0.31519	0.421092	0.204183	0.64369	0.377749	0.369004	0.508896	0.140023
21.42	0.406862	0.144798	0.064138	0.125284	0.578036	0.347659	0.423756	0.498813	0.542742	0.280302	0.312385	0.591825	0.340088	0.348157	0.442098	0.375643	0.418425	0.462289	0.281019	0.599178	0.617051	0.511683	0.360664	0.395586	0.49852	0.440534	0.213826	0.598558	0.363559	0.41121	0.583655	0.17917
21.56	0.426074	0.142828	0.184589	0.251816	0.511457	0.53484	0.183769	0.503434	0.57593	0.517865	0.331916	0.711353	0.396139	0.402204	0.470632	0.374061	0.306606	0.65225	0.501883	0.412484	0.599218	0.50368	0.452688	0.287738	0.501762	0.296612	0.341827	0.687008	0.36933	0.259731	0.423131	0.236263
21.7	0.397063	0.145097	-0.006415	0.199032	0.402996	0.406089	0.504517	0.389229	0.533816	0.334388	0.270267	0.64746	0.266382	0.456107	0.425895	0.241234	0.378621	0.554846	0.325887	0.494203	0.693335	0.448356	0.379856	0.345427	0.432486	0.399309	0.405979	0.619158	0.457564	0.265736	0.448886	0.191258
21.84	0.423959	0.147954	0.166758	0.044343	0.581154	0.316397	0.493113	0.309755	0.643999	0.395034	0.338467	0.672178	0.399572	0.397645	0.410612	0.428334	0.386636	0.544171	0.625007	0.578285	0.564435	0.549204	0.408143	0.353317	0.371925	0.339258	0.379177	0.634049	0.350167	0.30255	0.521619	0.213468
21.98	0.40446	0.142549	0.157048	0.220976	0.526139	0.435604	0.444148	0.397919	0.570827	0.377683	0.281109	0.736006	0.358042	0.30972	0.509519	0.230865	0.293613	0.554953	0.50147	0.450208	0.632104	0.50279	0.422649	0.238272	0.301895	0.431143	0.248308	0.517795	0.317317	0.38	0.590807	0.194878
22.12	0.424935	0.142936	0.186613	0.257387	0.76294	0.484416	0.221127	0.378259	0.623816	0.483843	0.341359	0.600702	0.367152	0.370336	0.51015	0.463198	0.320753	0.565178	0.358307	0.527065	0.67859	0.403217	0.382506	0.313146	0.423925	0.305151	0.345183	0.539317	0.321895	0.316959	0.632929	0.262632
22.26	0.408207	0.129719	0.119801	0.280448	0.646143	0.444387	0.297955	0.42383	0.590518	0.331001	0.370593	0.603689	0.482921	0.338042	0.388833	0.288263	0.405149	0.477524	0.462327	0.628837	0.614752	0.42211	0.449107	0.332073	0.352306	0.38995	0.240378	0.591586	0.386648	0.33706	0.297859	0.252118
22.4	0.42008	0.132294	0.230864	0.224705	0.673071	0.32915	0.362961	0.48065	0.591693	0.366264	0.286813	0.649584	0.451776	0.349163	0.436569	0.388375	0.370901	0.53057	0.438663	0.61828	0.601619	0.324773	0.422087	0.336929	0.420819	0.345476	0.239356	0.591521	0.428339	0.348845	0.561974	0.200607
22.54	0.435941	0.154065	0.300615	0.257702	0.706273	0.412807	0.479873	0.427883	0.62869	0.457568	0.238637	0.786846	0.422234	0.376852	0.479613	0.357797	0.229373	0.588387	0.461471	0.512925	0.709395	0.313027	0.464333	0.409926	0.355971	0.388709	0.33778	0.579726	0.446794	0.272749	0.563204	0.111075
22.68	0.403684	0.138898	0.239185	0.236749	0.512587	0.540692	0.33743	0.491227	0.52274	0.40898	0.319904	0.697385	0.366137	0.351026	0.49893	0.325897	0.256729	0.590541	0.284102	0.476675	0.702385	0.235501	0.502857	0.375741	0.312831	0.377416	0.25007	0.594247	0.427983	0.265991	0.410737	0.197847
22.82	0.407148	0.139332	0.153033	0.173772	0.641021	0.435624	0.21301	0.356052	0.536185	0.312074	0.297542	0.431602	0.292962	0.381613	0.606705	0.343654	0.352104	0.542641	0.50639	0.530191	0.780951	0.379156	0.433278	0.384864	0.425654	0.374275	0.417358	0.507181	0.372036	0.341954	0.486632	0.20493
22.96	0.416656	0.130421	0.239668	0.234921	0.612734	0.509454	0.255888	0.487842	0.622221	0.442951	0.274441	0.511817	0.335902	0.449113	0.531041	0.349815	0.344453	0.50675	0.214197	0.520917	0.757694	0.459378	0.433806	0.353716	0.379383	0.34922	0.343322	0.557356	0.354799	0.357769	0.454316	0.254788
23.1	0.410148	0.142828	0.126381	0.214039	0.550242	0.567302	0.340363	0.628903	0.61435	0.421576	0.302054	0.573385	0.303935	0.409894	0.482175	0.247606	0.291035	0.579139	0.357266	0.518063	0.699453	0.385128	0.338734	0.329347	0.382881	0.296314	0.35108	0.53013	0.371334	0.395714	0.519232	0.177386
23.24	0.418436	0.141786	0.223334	0.229282	0.615933	0.433848	0.2072	0.532532	0.613472	0.37155	0.314917	0.685179	0.376924	0.405096	0.546368	0.373402	0.229146	0.418793	0.397467	0.436835	0.764882	0.422739	0.326014	0.445245	0.344817	0.37431	0.367045	0.630359	0.453962	0.397435	0.414079	0.200919
23.38	0.402923	0.149333	0.087067	0.222179	0.425362	0.444474	0.331603	0.326174	0.570755	0.344033	0.306796	0.703692	0.453308	0.433391	0.617835	0.343828	0.272004	0.449441	0.331963	0.498206	0.771994	0.419371	0.359112	0.255197	0.278037	0.485108	0.309519	0.598334	0.342751	0.333525	0.53581	0.23683
23.52	0.406808	0.14539	0.10896	0.191977	0.6884	0.442941	0.323777	0.458917	0.571327	0.390024	0.304959	0.633958	0.363812	0.502592	0.468741	0.335134	0.382922	0.549196	0.4019	0.50977	0.703801	0.446539	0.374627	0.347082	0.333374	0.23479	0.222288	0.530103	0.397671	0.359461	0.468256	0.156941
23.66	0.404986	0.137761	0.197131	0.166603	0.549995	0.374336	0.24161	0.358724	0.565789	0.390915	0.306531	0.569051	0.457213	0.4155	0.579545	0.425334	0.318026	0.436087	0.431653	0.532215	0.781055	0.402254	0.400681	0.365687	0.360212	0.356971	0.292026	0.566789	0.371157	0.301695	0.496719	0.138076
23.8	0.417107	0.149248	0.113508	0.141163	0.571251	0.348991	0.270651	0.533323	0.580693	0.36828	0.315866	0.595054	0.402492	0.343984	0.556559	0.293058	0.321003	0.600235	0.619006	0.486112	0.648943	0.508969	0.382327	0.305009	0.36245	0.354402	0.291207	0.621569	0.384511	0.390265	0.590532	0.211791
23.94	0.418076	0.136542	0.18799	0.340819	0.668668	0.399797	0.365114	0.432869	0.570973	0.323604	0.300808	0.617585	0.355584	0.341506	0.47063	0.316263	0.291635	0.582652	0.479952	0.548883	0.757116	0.409139	0.333063	0.314742	0.410442	0.309498	0.334048	0.650524	0.380176	0.302259	0.467976	0.277974
24.08	0.403769	0.161278	0.165528	0.211037	0.856525	0.284417	0.269232	0.457928	0.580539	0.439447	0.259316	0.540202	0.483471	0.35633	0.525211	0.19947	0.331865	0.479739	0.33349	0.601873	0.717224	0.552948	0.327048	0.293634	0.327617	0.383518	0.383652	0.549448	0.365845	0.372086	0.243665	0.22078
24.22	0.420338	0.12645	0.223436	0.291693	0.464211	0.515286	0.43645	0.470206	0.589115	0.388942	0.375067	0.569236	0.456868	0.345813	0.467988	0.312988	0.292504	0.489992	0.452934	0.631703	0.753717	0.441547	0.373227	0.274577	0.335119	0.367254	0.257085	0.543639	0.402507	0.358342	0.531626	0.197076
24.36	0.415145	0.147175	0.143138	0.175652	0.553568	0.518712	0.261405	0.439632	0.584437	0.372235	0.234362	0.623526	0.407075	0.383563	0.493567	0.263931	0.344872	0.508804	0.539894	0.632052	0.688332	0.433511	0.445918	0.380513	0.372424	0.285412	0.332164	0.668831	0.362178	0.271637	0.497903	0.235102
24.5	0.414363	0.147353	0.222278	0.073987	0.482841	0.288461	0.388436	0.419177	0.60707	0.443327	0.310287	0.559277	0.404009	0.378907	0.522985	0.311363	0.29361	0.631465	0.227862	0.580023	0.672405	0.488885	0.431336	0.361988	0.449706	0.432472	0.206326	0.580393	0.420731	0.421281	0.622662	0.197345
24.64	0.427395	0.14122	0.375129	0.253659	0.270422	0.534953	0.437796	0.397522	0.542158	0.38072	0.321021	0.710995	0.339402	0.564528	0.503269	0.248019	0.224944	0.613017	0.484445	0.563835	0.762182	0.557745	0.376151	0.278709	0.361425	0.399387	0.431682	0.50715	0.412183	0.2661	0.486347	0.216948
24.78	0.430305	0.141301	0.14599	0.22152	0.411071	0.403211	0.517505	0.429303	0.540997	0.466642	0.295207	0.728217	0.472276	0.46058	0.565271	0.439692	0.268293	0.632351	0.344191	0.576765	0.688621	0.502344	0.430819	0.312968	0.338106	0.335053	0.372999	0.582329	0.42456	0.347378	0.486603	0.1683
24.92	0.438694	0.131937	0.272039	0.258554	0.572686	0.466061	0.527916	0.444951	0.521011	0.471236	0.319955	0.687511	0.295071	0.381632	0.476089	0.369709	0.391641	0.572448	0.417568	0.641581	0.629004	0.521692	0.421937	0.38609	0.333893	0.393241	0.348398	0.695617	0.451934	0.368197	0.404809	0.118334
25.06	0.411498	0.137123	0.09064	0.359229	0.651202	0.332387	0.416247	0.320601	0.586512	0.398475	0.228924	0.710923	0.445077	0.372162	0.497784	0.423577	0.27509	0.622542	0.428667	0.465267	0.551283	0.406263	0.38683	0.32886	0.343459	0.444733	0.345524	0.49301	0.336339	0.245142	0.592347	0.245839
25.2	0.419882	0.13253	0.185186	0.253504	0.526791	0.334858	0.397907	0.323805	0.619323	0.408011	0.361872	0.520404	0.459638	0.439254	0.558853	0.224464	0.378625	0.515761	0.38515	0.67261	0.649992	0.587045	0.36705	0.331197	0.409634	0.355883	0.394219	0.581923	0.450216	0.28764	0.454815	0.160816
25.34	0.408187	0.118856	0.085736	0.358521	0.45816	0.512374	0.30397	0.35202	0.547993	0.464669	0.225884	0.431854	0.43633	0.312694	0.484321	0.285751	0.408738	0.556832	0.493485	0.583727	0.618701	0.462259	0.439675	0.316291	0.469159	0.35676	0.312308	0.577383	0.380538	0.347245	0.406073	0.256169
25.48	0.430378	0.141641	0.158541	0.202258	0.507608	0.442066	0.384036	0.567462	0.587333	0.446013	0.392664	0.720657	0.429926	0.352762	0.388534	0.32576	0.373843	0.592764	0.639958	0.611349	0.665162	0.472707	0.407481	0.331788	0.342363	0.295866	0.313199	0.586175	0.392319	0.289046	0.461147	0.230541
25.62	0.423418	0.11718	0.256361	0.259701	0.516782	0.362059	0.279586	0.50283	0.626213	0.426702	0.398475	0.591488	0.441819	0.423128	0.490713	0.313988	0.310432	0.591244	0.284089	0.532167	0.568183	0.55922	0.396579	0.427709	0.33789	0.404409	0.231286	0.618904	0.409848	0.431034	0.433619	0.276077
25.76	0.43706	0.141286	0.285066	0.245718	0.654768	0.52551	0.453929	0.582351	0.576537	0.224971	0.336981	0.692148	0.42411	0.274467	0.395914	0.427247	0.339791	0.579169	0.508291	0.483482	0.764953	0.410134	0.417623	0.364649	0.408908	0.324373	0.305358	0.586839	0.397442	0.320818	0.562644	0.237605
25.9	0.417752	0.131204	0.177352	0.246031	0.565655	0.450709	0.384558	0.580643	0.519822	0.516805	0.328644	0.646402	0.405819	0.441997	0.481032	0.296669	0.446602	0.550574	0.394551	0.541054	0.680483	0.35989	0.352807	0.317189	0.458292	0.342045	0.14509	0.495183	0.411191	0.362055	0.437744	0.195684
26.04	0.42536	0.130419	0.288851	0.254524	0.45981	0.506282	0.462889	0.539467	0.513372	0.468928	0.28857	0.540525	0.314928	0.378551	0.564197	0.27633	0.436766	0.561947	0.42148	0.635828	0.773057	0.473358	0.389441	0.410038	0.398721	0.369403	0.204859	0.555402	0.385271	0.384793	0.301441	0.201783
26.18	0.43994	0.143876	0.06875	0.293912	0.621767	0.524656	0.384798	0.537609	0.585025	0.444135	0.366806	0.689701	0.397234	0.383125	0.488774	0.346418	0.314208	0.69337	0.565917	0.616388	0.628323	0.437421	0.452404	0.268431	0.288782	0.403467	0.390185	0.543681	0.424936	0.284846	0.480413	0.27271
26.32	0.425619	0.140893	0.058921	0.35328	0.448826	0.341441	0.410651	0.547308	0.584935	0.406751	0.287112	0.671049	0.321421	0.382213	0.589209	0.30757	0.384094	0.60748	0.447713	0.57005	0.732542	0.36047	0.34722	0.311991	0.323008	0.465648	0.422471	0.520395	0.429256	0.307306	0.56523	0.263004
26.46	0.427693	0.139222	0.208746	0.244147	0.584329	0.485263	0.24593	0.385342	0.615081	0.349328	0.307725	0.587106	0.458123	0.408355	0.507106	0.322931	0.353938	0.588287	0.502909	0.474059	0.776764	0.460487	0.344324	0.255825	0.447049	0.37627	0.256546	0.563457	0.434485	0.359689	0.63925	0.28794
26.6	0.451649	0.128832	0.220328	0.319099	0.735315	0.476261	0.323058	0.625116	0.649577	0.468778	0.353095	0.538359	0.350749	0.474742	0.555065	0.294052	0.313581	0.568321	0.501033	0.607951	0.608892	0.400097	0.475427	0.394469	0.463108	0.327284	0.295144	0.472396	0.460243	0.422327	0.579873	0.275727
26.74	0.437998	0.131066	0.165353	0.281054	0.401959	0.494822	0.323133	0.482214	0.576158	0.458812	0.293477	0.739447	0.392174	0.347268	0.509245	0.388742	0.316229	0.572075	0.584251	0.607106	0.648798	0.401128	0.43821	0.300414	0.384183	0.365152	0.382859	0.65012	0.463973	0.383709	0.491788	0.296083
26.88	0.405762	0.116687	0.222232	0.264498	0.379691	0.381887	0.397463	0.523189	0.513466	0.430863	0.221309	0.68158	0.45348	0.402287	0.467962	0.416575	0.294668	0.540779	0.396386	0.44416	0.585378	0.397124	0.440318	0.372395	0.355918	0.25199	0.391579	0.617624	0.4173	0.249486	0.439426	0.22185
27.02	0.446462	0.136067	0.365572	0.209786	0.548202	0.517151	0.422862	0.386708	0.577816	0.420501	0.334009	0.689118	0.38453	0.358549	0.551588	0.344206	0.255632	0.493775	0.628137	0.672987	0.77515	0.476244	0.356359	0.272584	0.444033	0.397455	0.363716	0.558367	0.445707	0.386603	0.495375	0.261135
27.16	0.421164	0.133702	0.223862	0.307899	0.653876	0.422093	0.404671	0.437891	0.597287	0.457479	0.302622	0.623476	0.396465	0.417551	0.529537	0.327502	0.299309	0.498396	0.421132	0.618837	0.678166	0.302759	0.390961	0.326067	0.289977	0.40022	0.275073	0.64941	0.400224	0.393775	0.414738	0.173663
27.3	0.43099	0.13629	0.311031	0.190696	0.561209	0.407814	0.359359	0.554262	0.533036	0.587321	0.327631	0.598031	0.375687	0.393696	0.535117	0.455291	0.293124	0.561155	0.524299	0.673711	0.693169	0.351256	0.388677	0.272574	0.260279	0.403954	0.378035	0.619034	0.384459	0.363985	0.378227	0.193565
27.44	0.412206	0.14456	0.011727	0.278306	0.513906	0.361438	0.539273	0.547152	0.597155	0.637593	0.300433	0.500352	0.315268	0.412561	0.505184	0.298338	0.274572	0.510018	0.375252	0.413153	0.644331	0.411756	0.47524	0.25457	0.424178	0.329004	0.254639	0.605848	0.458421	0.317154	0.558914	0.240457
27.58	0.432185	0.127349	0.217771	0.350095	0.580372	0.551689	0.248884	0.435475	0.58686	0.503588	0.289103	0.602256	0.417207	0.314247	0.558636	0.449963	0.380139	0.545685	0.388762	0.460782	0.803184	0.388757	0.471937	0.348622	0.359942	0.352785	0.381297	0.503524	0.361385	0.362247	0.511022	0.239344
27.72	0.443757	0.123871	0.246891	0.296463	0.547072	0.545672	0.447701	0.446514	0.481893	0.544144	0.246675	0.692679	0.37693	0.398266	0.49911	0.376259	0.339325	0.539549	0.662443	0.5612	0.668562	0.498764	0.471607	0.319464	0.45681	0.360523	0.356527	0.504507	0.400439	0.386305	0.445435	0.19498
27.86	0.431192	0.124798	0.247564	0.308248	0.632055	0.333308	0.447376	0.499527	0.565179	0.452123	0.334867	0.641577	0.326847	0.390706	0.528556	0.442928	0.305141	0.488855	0.551053	0.587968	0.705174	0.4405	0.446861	0.307587	0.314919	0.419688	0.298781	0.525512	0.360595	0.42534	0.420351	0.186561
28	0.415029	0.122533	0.413132	0.344611	0.549226	0.299133	0.346978	0.406246	0.534957	0.406642	0.224607	0.569783	0.37664	0.356265	0.594939	0.348619	0.275341	0.47901	0.560938	0.568835	0.702888	0.314993	0.358788	0.261477	0.330373	0.413672	0.48192	0.538276	0.418351	0.279776	0.480355	0.214109
28.14	0.442974	0.11938	0.296204	0.268984	0.741424	0.542149	0.454983	0.550628	0.512079	0.505935	0.305533	0.562528	0.450126	0.370994	0.495018	0.417986	0.281993	0.459006	0.51969	0.616006	0.552187	0.422835	0.414748	0.35294	0.350178	0.392848	0.418949	0.536543	0.362077	0.358923	0.584061	0.191673
28.28	0.427607	0.105626	0.233311	0.408085	0.544983	0.526396	0.441891	0.478255	0.545747	0.508836	0.324811	0.455873	0.451846	0.402705	0.501319	0.400636	0.326836	0.470279	0.530784	0.553513	0.614974	0.365439	0.294118	0.332253	0.416109	0.403048	0.376895	0.538309	0.38165	0.313269	0.530645	0.155388
28.42	0.41985	0.116423	0.384644	0.311088	0.479377	0.342239	0.454375	0.492778	0.543511	0.443833	0.304809	0.746139	0.265079	0.320321	0.59104	0.299283	0.347591	0.503857	0.4749	0.491775	0.550789	0.487701	0.401984	0.25606	0.367	0.393766	0.343813	0.498299	0.384246	0.282351	0.567552	0.265304
28.56	0.446177	0.118285	0.312673	0.339207	0.661039	0.364573	0.492638	0.472472	0.532176	0.561688	0.329483	0.468719	0.512703	0.421948	0.581189	0.251976	0.409174	0.518542	0.598437	0.586001	0.740075	0.364818	0.393256	0.358644	0.411849	0.413266	0.353115	0.540319	0.334582	0.37352	0.426184	0.261042
28.7	0.428103	0.145528	0.318797	0.181245	0.458154	0.44721	0.310618	0.596753	0.568341	0.479928	0.256062	0.437591	0.488717	0.383042	0.556879	0.391458	0.378592	0.612337	0.361015	0.736178	0.688198	0.366581	0.41515	0.351586	0.269101	0.443037	0.190275	0.638731	0.455933	0.377051	0.521564	0.162976
28.84	0.44829	0.168006	0.074986	0.3319	0.466186	0.632768	0.305953	0.46426	0.536912	0.356688	0.244136	0.814064	0.432202	0.46862	0.628386	0.423941	0.39149	0.608316	0.444222	0.665475	0.768734	0.453096	0.379761	0.289218	0.263392	0.434213	0.46809	0.698021	0.469699	0.354023	0.390058	0.189892
28.98	0.406517	0.124832	0.193451	0.217632	0.465562	0.351455	0.443898	0.430621	0.565685	0.476623	0.312376	0.611201	0.469863	0.433273	0.464484	0.249359	0.400104	0.498145	0.391277	0.592375	0.573736	0.404039	0.427391	0.321109	0.39284	0.3276	0.24077	0.670102	0.400286	0.281115	0.407337	0.181785
29.12	0.445502	0.13551	0.275406	0.235568	0.588733	0.503209	0.482157	0.436652	0.583477	0.301301	0.332601	0.762106	0.497975	0.384279	0.581527	0.339568	0.368713	0.437905	0.455634	0.532403	0.745704	0.422093	0.452337	0.326626	0.365878	0.469136	0.260448	0.573705	0.491064	0.416644	0.53723	0.204978
29.26	0.431257	0.128375	0.311034	0.184597	0.45083	0.45991	0.667705	0.429495	0.572063	0.388672	0.263653	0.585593	0.446281	0.362666	0.507698	0.35288	0.361976	0.52356	0.460352	0.483115	0.699084	0.484785	0.407188	0.296903	0.347917	0.438203	0.42633	0.544347	0.493101	0.27632	0.562987	0.148455
29.4	0.438371	0.132891	0.338285	0.304499	0.631897	0.446505	0.427972	0.495667	0.596209	0.432837	0.324307	0.743197	0.482444	0.390363	0.485019	0.333733	0.308471	0.495077	0.384094	0.583758	0.700858	0.343952	0.505539	0.345117	0.39378	0.404306	0.3093	0.657846	0.475934	0.239975	0.33047	0.239728
29.54	0.44012	0.125012	0.170043	0.350258	0.680686	0.384223	0.463666	0.496621	0.581086	0.410083	0.295136	0.576405	0.507822	0.286574	0.505982	0.487707	0.342756	0.441113	0.531568	0.542782	0.682307	0.541558	0.424864	0.357545	0.332168	0.377316	0.352397	0.618651	0.469304	0.303923	0.431407	0.257643
29.68	0.421608	0.127797	0.163199	0.313364	0.570279	0.426048	0.381537	0.364321	0.574933	0.376821	0.303845	0.697712	0.436584	0.389762	0.449384	0.338089	0.385284	0.42155	0.468411	0.647269	0.648939	0.559902	0.459845	0.371747	0.259728	0.415217	0.356241	0.506365	0.463062	0.300478	0.422189	0.176149
29.82	0.429732	0.134869	0.22719	0.243746	0.465914	0.466122	0.480885	0.346791	0.616394	0.250276	0.235223	0.536742	0.459802	0.378168	0.505891	0.365392	0.356864	0.544469	0.612293	0.607404	0.754138	0.388852	0.42217	0.330784	0.302087	0.516956	0.418359	0.625191	0.460186	0.360183	0.382715	0.230771
29.96	0.415914	0.141435	0.207358	0.12897	0.511138	0.370069	0.407112	0.409052	0.559481	0.457436	0.299345	0.538709	0.474908	0.340716	0.459753	0.339446	0.306097	0.448964	0.702333	0.464717	0.725701	0.37545	0.370779	0.436281	0.463616	0.39878	0.4019	0.66863	0.34996	0.238006	0.474078	0.148637
30.1	0.433855	0.132461	0.212897	0.324739	0.498948	0.507638	0.455956	0.552917	0.586419	0.469689	0.316174	0.684809	0.476694	0.418593	0.550191	0.320174	0.298578	0.485985	0.448366	0.506141	0.661529	0.455707	0.399481	0.437796	0.497847	0.387826	0.383037	0.63685	0.321193	0.196076	0.394692	0.128714
30.24	0.442279	0.137622	0.293986	0.266822	0.471713	0.650733	0.398964	0.598748	0.562826	0.434469	0.217799	0.530784	0.404345	0.340337	0.474784	0.354209	0.341945	0.5205	0.470366	0.61801	0.812036	0.467301	0.436582	0.276692	0.407089	0.422955	0.427509	0.594991	0.380874	0.335446	0.566233	0.189317
30.38	0.424483	0.130089	0.3194	0.232892	0.527188	0.371582	0.369631	0.492423	0.613147	0.460776	0.270501	0.623471	0.481361	0.399042	0.486894	0.348998	0.417944	0.467935	0.569986	0.465349	0.678322	0.40088	0.44177	0.280769	0.377661	0.352323	0.192458	0.647386	0.510104	0.259239	0.473478	0.201578
30.52	0.451629	0.144737	0.191624	0.223943	0.522705	0.413366	0.385437	0.595862	0.575966	0.522548	0.339286	0.874641	0.364769	0.355363	0.522634	0.464361	0.298467	0.506573	0.589964	0.549919	0.606821	0.563306	0.373443	0.409254	0.401975	0.411568	0.390123	0.643051	0.444507	0.336131	0.473056	0.198213
30.66	0.446349	0.115549	0.300338	0.327966	0.516221	0.386756	0.420003	0.562496	0.661067	0.528203	0.337052	0.603529	0.354369	0.406959	0.544334	0.384135	0.370945	0.517108	0.443783	0.524376	0.750136	0.370248	0.424587	0.399096	0.427232	0.42394	0.30178	0.551118	0.371726	0.371286	0.565061	0.244618
30.8	0.442401	0.136226	0.293508	0.168199	0.609759	0.438596	0.56211	0.55745	0.595969	0.40058	0.35741	0.727833	0.511252	0.384246	0.515864	0.350608	0.407246	0.43075	0.333298	0.535567	0.688762	0.479186	0.413402	0.353632	0.457302	0.455796	0.231165	0.652806	0.433979	0.317265	0.385905	0.222593
30.94	0.439115	0.134301	0.213279	0.343465	0.654853	0.420754	0.444171	0.5118	0.545461	0.420953	0.337171	0.68997	0.442315	0.452835	0.517255	0.246286	0.308159	0.459353	0.581693	0.528433	0.764796	0.438466	0.457675	0.331167	0.369371	0.452803	0.371929	0.572361	0.447672	0.331516	0.343344	0.174158
31.08	0.428258	0.139768	0.119041	0.223935	0.684868	0.402279	0.381904	0.430296	0.543079	0.438411	0.323317	0.745584	0.416949	0.431739	0.562459	0.28789	0.33441	0.46594	0.489307	0.495996	0.690642	0.488348	0.401554	0.373349	0.405424	0.491112	0.400157	0.57825	0.372342	0.327097	0.349604	0.192468
31.22	0.403842	0.154653	0.072256	0.228703	0.536849	0.336071	0.226085	0.505418	0.636611	0.513294	0.27238	0.728094	0.385927	0.422418	0.535286	0.251325	0.366201	0.403071	0.460209	0.523547	0.614127	0.516208	0.490192	0.368445	0.374588	0.300004	0.243464	0.609331	0.434271	0.264597	0.362442	0.133837
31.36	0.444178	0.138379	0.217875	0.185851	0.703654	0.404344	0.32237	0.630078	0.612103	0.460747	0.270829	0.52886	0.358202	0.44097	0.580495	0.484467	0.312048	0.461417	0.544802	0.576625	0.726489	0.571551	0.441299	0.359988	0.438678	0.444284	0.278539	0.463489	0.45914	0.354664	0.450295	0.2412
31.5	0.435011	0.136953	0.061458	0.411386	0.549109	0.476387	0.345146	0.479987	0.569839	0.412414	0.308229	0.72471	0.451703	0.403453	0.474361	0.394629	0.276121	0.522767	0.572424	0.489779	0.727156	0.415047	0.46828	0.33543	0.408593	0.440265	0.411221	0.580175	0.393272	0.285312	0.465077	0.196606
31.64	0.458065	0.1187	0.31305	0.281082	0.496597	0.423886	0.436191	0.521677	0.544337	0.609898	0.28311	0.747948	0.507684	0.35279	0.561949	0.406516	0.378515	0.503171	0.561774	0.446164	0.621211	0.36669	0.535172	0.3414	0.35836	0.508395	0.404917	0.572581	0.484784	0.321795	0.588385	0.261909
31.78	0.429382	0.142439	0.069426	0.200201	0.372597	0.504833	0.29021	0.59198	0.52691	0.485793	0.291495	0.594092	0.382177	0.406109	0.535953	0.336325	0.399923	0.697031	0.266382	0.614127	0.621176	0.392585	0.462239	0.534353	0.404577	0.347615	0.52788	0.608074	0.366241	0.35491	0.434199	0.262038
31.92	0.443962	0.131859	0.208746	0.198747	0.533517	0.406977	0.39203	0.439804	0.595658	0.573659	0.369999	0.761043	0.42974	0.336873	0.493984	0.391869	0.359418	0.589829	0.343161	0.567429	0.737676	0.457154	0.476114	0.353708	0.392402	0.490506	0.403314	0.577421	0.385644	0.350403	0.424353	0.277672
32.06	0.437683	0.13857	0.111371	0.222339	0.645072	0.404589	0.517416	0.541193	0.597462	0.441649	0.381798	0.557028	0.432462	0.332941	0.520012	0.350462	0.321596	0.562696	0.351592	0.580875	0.723304	0.483813	0.440963	0.388913	0.451641	0.349551	0.338121	0.610219	0.508384	0.30558	0.465773	0.191672
32.2	0.456226	0.165431	0.200991	0.344335	0.576664	0.410984	0.192992	0.485812	0.575091	0.615613	0.250583	0.891518	0.476271	0.303843	0.51373	0.351848	0.238628	0.633108	0.576102	0.492945	0.739547	0.541354	0.440905	0.38052	0.465462	0.379388	0.407023	0.641473	0.405972	0.32836	0.595816	0.229904
32.34	0.443443	0.128013	0.180328	0.214564	0.616675	0.324625	0.554124	0.570118	0.614239	0.553393	0.354123	0.652891	0.46325	0.431519	0.491137	0.383543	0.392987	0.482833	0.310935	0.555045	0.62743	0.418213	0.380381	0.352546	0.460317	0.375782	0.380263	0.644061	0.437591	0.356827	0.486008	0.237534
32.48	0.433223	0.135322	0.124042	0.217591	0.613971	0.501748	0.501408	0.520516	0.544191	0.524146	0.370831	0.663922	0.393726	0.291944	0.487343	0.389438	0.338401	0.589524	0.406136	0.525387	0.666271	0.485528	0.368932	0.279817	0.46537	0.321249	0.372159	0.620206	0.388589	0.281953	0.478555	0.263786
32.62	0.437214	0.139836	0.175906	0.125601	0.482773	0.400401	0.371134	0.504855	0.559882	0.430896	0.267658	0.681861	0.413665	0.321359	0.563855	0.505557	0.340886	0.700351	0.56339	0.624634	0.638187	0.461309	0.399354	0.362977	0.454565	0.368468	0.483333	0.517017	0.346174	0.424674	0.414216	0.211481
32.76	0.429947	0.135366	0.095909	0.18441	0.465024	0.414545	0.354132	0.594023	0.60603	0.281498	0.358497	0.556876	0.447156	0.465806	0.477708	0.449862	0.296729	0.552362	0.480743	0.503622	0.720548	0.450407	0.452466	0.405845	0.504172	0.312585	0.449226	0.610123	0.354587	0.352858	0.498238	0.202423
32.9	0.453318	0.166538	0.086929	0.104602	0.773811	0.351777	0.565765	0.467626	0.535478	0.553883	0.283432	0.688173	0.501023	0.401676	0.542131	0.281292	0.350573	0.554853	0.618021	0.586728	0.783654	0.442897	0.471053	0.346414	0.423412	0.34343	0.42897	0.603258	0.427436	0.333443	0.493948	0.253838
33.04	0.454697	0.131378	0.299309	0.260702	0.722311	0.488129	0.286335	0.509573	0.615572	0.439997	0.334114	0.687893	0.41541	0.352511	0.58538	0.394871	0.381314	0.509514	0.401468	0.424571	0.715634	0.637925	0.453702	0.278648	0.351953	0.42033	0.462193	0.548487	0.424819	0.492395	0.486844	0.259011
33.18	0.453928	0.140173	0.232196	0.251322	0.640913	0.46104	0.438082	0.497989	0.669584	0.4594	0.272207	0.641655	0.44954	0.398951	0.537424	0.33733	0.365649	0.480066	0.498975	0.551097	0.874026	0.616769	0.436152	0.322825	0.454834	0.431053	0.353385	0.506558	0.428548	0.395759	0.346399	0.268109
33.32	0.448997	0.133527	0.190723	0.361282	0.493416	0.35389	0.367623	0.504082	0.569012	0.438654	0.243897	0.802582	0.426149	0.370738	0.577145	0.4885	0.434693	0.484032	0.511906	0.562481	0.674642	0.426868	0.475278	0.316597	0.47048	0.403809	0.459315	0.653726	0.392559	0.319558	0.494847	0.201428
33.46	0.421461	0.160764	-0.016929	0.254666	0.486639	0.355363	0.20094	0.576974	0.566779	0.4806	0.253873	0.642099	0.412471	0.352642	0.46343	0.488865	0.332025	0.502318	0.5084	0.584373	0.674169	0.471171	0.413946	0.359216	0.272466	0.271346	0.477292	0.597439	0.307041	0.493204	0.674886	0.186116
33.6	0.432823	0.130462	0.135066	0.275013	0.481128	0.425923	0.39479	0.498242	0.581042	0.456217	0.298277	0.596009	0.441256	0.463828	0.663199	0.506055	0.378265	0.579193	0.407607	0.417236	0.723233	0.511695	0.349767	0.288108	0.336706	0.419221	0.356357	0.517827	0.400917	0.345946	0.544531	0.19203
33.74	0.441406	0.142841	0.286497	0.169149	0.504028	0.555119	0.35087	0.343875	0.55971	0.505409	0.276009	0.78288	0.381316	0.431536	0.555353	0.372896	0.332862	0.437276	0.484603	0.489902	0.718421	0.604947	0.41856	0.361687	0.406882	0.420762	0.509279	0.597752	0.342136	0.277801	0.575908	0.188766
33.88	0.427907	0.137305	0.084751	0.3006	0.406829	0.448219	0.40112	0.34272	0.66742	0.552954	0.347755	0.690215	0.43442	0.408081	0.495404	0.358687	0.366987	0.486383	0.688069	0.516061	0.669261	0.443422	0.403604	0.328619	0.346931	0.437385	0.334668	0.496759	0.338655	0.32848	0.508407	0.204352
34.02	0.436229	0.140322	0.142957	0.36317	0.595823	0.516307	0.456988	0.764152	0.539746	0.526532	0.349918	0.606734	0.410007	0.368938	0.457167	0.412365	0.266975	0.496212	0.381638	0.527666	0.751145	0.483918	0.462638	0.310572	0.403203	0.351856	0.377486	0.565181	0.350929	0.287646	0.349952	0.209055
34.16	0.426538	0.144875	0.0545	0.287158	0.456785	0.610122	0.405223	0.369536	0.607488	0.444482	0.221676	0.643115	0.382346	0.383088	0.616728	0.430406	0.368617	0.490067	0.506068	0.562912	0.69526	0.458628	0.402218	0.489039	0.35276	0.224178	0.41341	0.575258	0.387664	0.259889	0.472113	0.225408
34.3	0.433114	0.127866	0.274026	0.25219	0.641254	0.488109	0.438474	0.565438	0.596218	0.421862	0.343443	0.644886	0.400245	0.282449	0.604176	0.298037	0.350662	0.558994	0.458964	0.515947	0.648619	0.455483	0.36442	0.330478	0.308397	0.381092	0.303379	0.520915	0.385074	0.359806	0.567952	0.232432
34.44	0.442935	0.123648	0.178106	0.348523	0.615681	0.5055	0.392748	0.418182	0.612852	0.465987	0.325612	0.625357	0.468722	0.385916	0.535953	0.428327	0.338916	0.525882	0.435001	0.5045	0.543393	0.622369	0.426408	0.308511	0.438464	0.301561	0.440392	0.676197	0.384821	0.452265	0.417324	0.164576
34.58	0.459116	0.159126	0.213219	0.20155	0.775947	0.606624	0.619652	0.459039	0.565183	0.508205	0.302218	0.789532	0.359731	0.429019	0.573584	0.31165	0.388223	0.498878	0.512601	0.592868	0.736597	0.49764	0.354488	0.330176	0.405808	0.373099	0.335743	0.617327	0.389211	0.380528	0.453452	0.191702
34.72	0.427266	0.123578	0.22625	0.365966	0.462586	0.421972	0.464015	0.405808	0.481862	0.531441	0.234853	0.559551	0.375903	0.357983	0.568826	0.391247	0.364859	0.645387	0.33146	0.587904	0.71884	0.403359	0.487226	0.261345	0.421432	0.474749	0.323755	0.57547	0.431606	0.306039	0.422627	0.21367
34.86	0.444193	0.135464	0.316558	0.113457	0.511485	0.295268	0.494754	0.619966	0.542456	0.668862	0.325697	0.566003	0.428849	0.378884	0.469738	0.444375	0.406123	0.617414	0.563324	0.480696	0.724718	0.522397	0.400259	0.328732	0.43429	0.354179	0.484176	0.556861	0.401049	0.305985	0.357881	0.211363
35	0.439663	0.125197	0.21101	0.257615	0.558851	0.420735	0.479033	0.594202	0.545554	0.459637	0.374933	0.582206	0.442302	0.361807	0.44368	0.384439	0.428767	0.679474	0.530584	0.624327	0.653999	0.365546	0.43151	0.359598	0.362771	0.394526	0.357425	0.519336	0.378676	0.189371	0.531736	0.266255
35.14	0.44276	0.136199	0.071884	0.286704	0.52011	0.481444	0.46167	0.356936	0.644509	0.401166	0.380705	0.620275	0.446429	0.381197	0.524812	0.441513	0.345462	0.67534	0.371043	0.565607	0.721916	0.47072	0.467318	0.394008	0.410876	0.290189	0.454565	0.586185	0.465541	0.340533	0.483626	0.220529
35.28	0.421605	0.132407	0.218122	0.207395	0.699434	0.342898	0.231764	0.437779	0.538285	0.575757	0.389157	0.625927	0.330195	0.449291	0.43499	0.481508	0.400351	0.482499	0.26381	0.511326	0.594421	0.568998	0.433804	0.516718	0.378201	0.399255	0.273246	0.461909	0.436598	0.396414	0.435302	0.13279
35.42	0.438939	0.13272	0.173196	0.33452	0.611293	0.564354	0.370894	0.475256	0.585076	0.39973	0.354983	0.712512	0.332912	0.322631	0.618837	0.403909	0.346026	0.440533	0.425971	0.585578	0.73283	0.419692	0.351087	0.421461	0.397194	0.289491	0.44731	0.577913	0.429472	0.453496	0.342446	0.247555
35.56	0.449164	0.120983	0.356638	0.257691	0.614942	0.528913	0.440333	0.307017	0.656757	0.608416	0.332559	0.665495	0.371665	0.413447	0.580623	0.306137	0.353886	0.540251	0.470167	0.561972	0.586291	0.478437	0.43395	0.347365	0.333555	0.40462	0.372263	0.513656	0.482635	0.39257	0.541826	0.220858
35.7	0.423017	0.137949	0.261035	0.203826	0.602085	0.472729	0.311679	0.536476	0.55095	0.467342	0.294234	0.662505	0.452508	0.368046	0.439492	0.438552	0.299014	0.474107	0.291813	0.551891	0.769862	0.370759	0.49302	0.325807	0.416144	0.45087	0.403461	0.612463	0.355228	0.306462	0.352945	0.155198
35.84	0.422335	0.138313	0.096995	0.212245	0.583149	0.428707	0.4285	0.449372	0.592149	0.461409	0.364856	0.602341	0.357596	0.347626	0.485688	0.374531	0.403444	0.551933	0.412755	0.594406	0.755151	0.480502	0.429936	0.36061	0.42646	0.456127	0.373415	0.510137	0.340378	0.416129	0.219166	0.15434
35.98	0.431995	0.137069	0.23555	0.198704	0.518386	0.526692	0.34401	0.689951	0.501242	0.482819	0.259743	0.586611	0.440134	0.380789	0.519633	0.326565	0.370056	0.631056	0.29667	0.518772	0.698214	0.376976	0.359555	0.323203	0.330811	0.380099	0.418123	0.649116	0.44793	0.401013	0.532031	0.215409
36.12	0.436534	0.141789	0.304111	0.22311	0.614168	0.508665	0.271712	0.517064	0.733679	0.501566	0.321237	0.606874	0.441612	0.42475	0.587221	0.313047	0.354978	0.609834	0.291584	0.573491	0.709778	0.427772	0.396052	0.284314	0.428849	0.375934	0.311784	0.545975	0.419217	0.277515	0.486576	0.233538
36.26	0.436867	0.128691	0.152891	0.32173	0.470341	0.558449	0.417322	0.42424	0.561624	0.51157	0.301745	0.576	0.438493	0.349888	0.56452	0.351132	0.391821	0.530667	0.405315	0.691687	0.746478	0.49487	0.426352	0.34121	0.431964	0.38192	0.330995	0.582806	0.370564	0.304479	0.430991	0.243949
36.4	0.448534	0.150445	0.142274	0.190899	0.701487	0.461975	0.241482	0.775582	0.567404	0.487304	0.406068	0.641912	0.43152	0.403244	0.580936	0.355629	0.347916	0.551173	0.373426	0.434647	0.70666	0.478645	0.491559	0.44294	0.454804	0.49389	0.338054	0.599186	0.421223	0.355051	0.344054	0.235078
36.54	0.439637	0.1381	0.223898	0.231507	0.535234	0.428586	0.529784	0.401977	0.554785	0.310244	0.320207	0.742423	0.433834	0.374207	0.517005	0.357423	0.347739	0.680134	0.325369	0.660496	0.596069	0.39392	0.398664	0.359767	0.527076	0.320289	0.543902	0.564537	0.372249	0.325807	0.579973	0.232003
36.68	0.448054	0.133577	0.16147	0.273053	0.523059	0.452337	0.401444	0.632579	0.574496	0.491601	0.28896	0.641783	0.427692	0.424182	0.501065	0.474184	0.332362	0.539882	0.572601	0.556148	0.734032	0.447648	0.447192	0.32854	0.328325	0.454008	0.387091	0.57833	0.339562	0.359396	0.571003	0.197591
36.82	0.449082	0.135894	0.377784	0.220842	0.606567	0.494835	0.310794	0.347378	0.555687	0.519126	0.305242	0.782939	0.411792	0.396757	0.622634	0.456792	0.289903	0.459595	0.529395	0.536805	0.725998	0.437176	0.451227	0.330382	0.413112	0.425849	0.295168	0.588372	0.36424	0.381813	0.575377	0.258891
36.96	0.446614	0.141683	0.249805	0.17915	0.532354	0.587544	0.365038	0.475505	0.662916	0.556996	0.256819	0.634076	0.436583	0.443762	0.605078	0.462849	0.334817	0.589598	0.541761	0.58935	0.696816	0.418296	0.36517	0.391729	0.445808	0.335988	0.391443	0.626997	0.398592	0.330009	0.282469	0.211088
37.1	0.454207	0.15088	0.103298	0.241623	0.837887	0.569204	0.538215	0.586745	0.542439	0.424502	0.335572	0.657322	0.425624	0.386425	0.558833	0.313659	0.361258	0.489584	0.515966	0.575088	0.72874	0.406159	0.434195	0.31628	0.423271	0.52962	0.325159	0.529656	0.382163	0.436013	0.408917	0.242784
37.24	0.435468	0.13655	0.034101	0.252166	0.522289	0.484465	0.501039	0.478286	0.584209	0.498874	0.33321	0.623901	0.423964	0.344456	0.533373	0.307147	0.335141	0.552391	0.545204	0.549799	0.645243	0.369198	0.362279	0.247468	0.37833	0.437787	0.423536	0.550539	0.518801	0.447451	0.559265	0.220124
37.38	0.431866	0.116263	0.244028	0.200091	0.66982	0.453772	0.505002	0.466151	0.661854	0.464804	0.360046	0.472145	0.472303	0.325784	0.513738	0.345321	0.319678	0.548438	0.406374	0.504409	0.609023	0.406265	0.414797	0.391856	0.407727	0.380661	0.323532	0.621214	0.426031	0.335025	0.433277	0.272816
37.52	0.444697	0.128997	0.244145	0.311216	0.713832	0.345263	0.367663	0.449137	0.639974	0.466791	0.33783	0.62741	0.461338	0.296738	0.611678	0.465278	0.341223	0.463886	0.374393	0.539913	0.572764	0.419149	0.399951	0.379786	0.454624	0.36698	0.407182	0.744125	0.44207	0.357868	0.506997	0.231701
37.66	0.446204	0.122987	0.195681	0.262476	0.655615	0.604466	0.558868	0.598523	0.552562	0.370091	0.34904	0.643196	0.522498	0.373074	0.491501	0.437401	0.347909	0.548061	0.521119	0.440516	0.553845	0.47324	0.458578	0.364849	0.354947	0.451081	0.298339	0.568678	0.357114	0.419723	0.409209	0.203936
37.8	0.449898	0.135829	0.246616	0.296337	0.569581	0.58817	0.445406	0.590987	0.640648	0.40321	0.326444	0.671343	0.418075	0.441962	0.449391	0.496135	0.368293	0.433037	0.285372	0.503271	0.776231	0.386256	0.414291	0.468454	0.273516	0.375688	0.540244	0.535074	0.363754	0.36613	0.626302	0.196731
37.94	0.440821	0.117779	0.374876	0.337853	0.441798	0.468029	0.31783	0.583946	0.526576	0.476165	0.270073	0.618826	0.45912	0.328786	0.544412	0.514788	0.425033	0.508874	0.353036	0.539221	0.752294	0.272103	0.403605	0.407247	0.440704	0.37962	0.299852	0.604841	0.395837	0.494134	0.459833	0.225333
38.08	0.426871	0.113882	0.337575	0.285093	0.504368	0.503855	0.372756	0.416262	0.510438	0.452603	0.355373	0.637169	0.46124	0.420331	0.519415	0.419948	0.187565	0.534688	0.444064	0.437657	0.707193	0.522258	0.394098	0.312191	0.328763	0.364993	0.303687	0.539595	0.458839	0.367304	0.491841	0.21497
38.22	0.43543	0.128997	0.358328	0.185245	0.564741	0.383001	0.316978	0.40907	0.579309	0.498774	0.338264	0.64551	0.448525	0.444171	0.480543	0.355348	0.362989	0.57948	0.563591	0.472121	0.718352	0.622357	0.371449	0.314999	0.409418	0.353088	0.298304	0.613343	0.389817	0.347075	0.421205	0.217494
38.36	0.44617	0.150384	0.178553	0.316465	0.626483	0.459945	0.353929	0.563973	0.665292	0.52731	0.366917	0.653373	0.397517	0.380174	0.59124	0.423982	0.336601	0.535719	0.198871	0.516039	0.768976	0.540608	0.427994	0.309952	0.415228	0.391955	0.339483	0.604419	0.369096	0.339855	0.614908	0.17025
38.5	0.407386	0.118064	0.178364	0.169717	0.612829	0.297002	0.320359	0.48682	0.55922	0.45094	0.297071	0.63585	0.421903	0.363398	0.472319	0.42618	0.390893	0.534384	0.376346	0.487132	0.577665	0.43317	0.361391	0.384432	0.433331	0.387874	0.324405	0.551603	0.386772	0.345463	0.341237	0.213497
38.64	0.448465	0.13575	0.265141	0.354834	0.585692	0.364217	0.524579	0.467757	0.55171	0.559664	0.246876	0.625486	0.562119	0.460956	0.501758	0.400858	0.337071	0.565525	0.53096	0.502895	0.778343	0.547771	0.397253	0.351707	0.32987	0.4648	0.351209	0.574444	0.492749	0.35577	0.26218	0.139753
38.78	0.430487	0.126753	0.167298	0.272693	0.459718	0.498174	0.424077	0.349158	0.562395	0.392143	0.299819	0.538359	0.350472	0.489987	0.431589	0.42475	0.339887	0.61156	0.377105	0.630254	0.762661	0.488413	0.382694	0.362751	0.455204	0.33677	0.326735	0.570389	0.459609	0.454154	0.494539	0.20125
38.92	0.431302	0.116688	0.29774	0.315483	0.452919	0.321805	0.461258	0.513431	0.570665	0.329498	0.352156	0.707996	0.335075	0.374256	0.495269	0.282526	0.426545	0.614334	0.444108	0.547776	0.678213	0.378855	0.390721	0.328631	0.492798	0.347617	0.40449	0.600324	0.422102	0.353348	0.41814	0.280969
39.06	0.446882	0.131062	0.162052	0.221053	0.552503	0.450591	0.387548	0.553935	0.599348	0.329197	0.348906	0.592704	0.503196	0.351484	0.55204	0.324424	0.480363	0.614693	0.314068	0.50864	0.670427	0.599515	0.416281	0.284314	0.469722	0.387488	0.390513	0.592354	0.376135	0.524167	0.569024	0.279772
39.2	0.439914	0.16595	0.168066	0.132725	0.572939	0.518073	0.327301	0.41208	0.574091	0.507151	0.281372	0.854704	0.443838	0.523606	0.523438	0.375913	0.425843	0.633224	0.272169	0.643304	0.782253	0.41861	0.379406	0.237449	0.315551	0.46552	0.389447	0.508099	0.399665	0.413104	0.497276	0.201196
39.34	0.449465	0.122244	0.296758	0.267294	0.666721	0.621625	0.37143	0.598856	0.579499	0.407255	0.315934	0.508146	0.382469	0.411198	0.390175	0.358145	0.465292	0.671567	0.441725	0.530032	0.702563	0.442647	0.371302	0.383963	0.419124	0.425037	0.336656	0.596335	0.332305	0.382732	0.515392	0.291782
39.48	0.45542	0.133914	0.24989	0.254567	0.473008	0.401592	0.468895	0.384991	0.576064	0.413909	0.293737	0.935625	0.454852	0.416544	0.481493	0.433219	0.405506	0.578898	0.365448	0.494816	0.668709	0.46645	0.457995	0.364281	0.41974	0.417334	0.40039	0.580551	0.482394	0.48741	0.568838	0.265466
39.62	0.436261	0.125708	0.283891	0.280641	0.482585	0.433403	0.564576	0.480184	0.588042	0.364594	0.315972	0.643189	0.418959	0.400514	0.538324	0.432085	0.417514	0.52793	0.419804	0.605765	0.744257	0.464501	0.369203	0.246357	0.376812	0.278908	0.497539	0.52568	0.420824	0.337458	0.453773	0.174555
39.76	0.449587	0.13639	0.307558	0.337032	0.4103	0.546984	0.461213	0.582716	0.529729	0.484794	0.345796	0.824709	0.484227	0.344017	0.539923	0.314105	0.348731	0.641067	0.374846	0.471262	0.706517	0.575426	0.397512	0.324275	0.394771	0.417208	0.437299	0.546564	0.389851	0.363968	0.455053	0.130164
39.9	0.438003	0.130632	-0.002583	0.307778	0.600567	0.391593	0.445814	0.454756	0.575811	0.440368	0.410801	0.50747	0.427905	0.412858	0.646602	0.396971	0.343325	0.634386	0.53108	0.576969	0.551687	0.500435	0.38944	0.389926	0.3677	0.435635	0.297297	0.621781	0.427486	0.385471	0.385034	0.28572
40.04	0.45907	0.148518	0.265179	0.259062	0.579441	0.338886	0.310224	0.570337	0.52783	0.437529	0.327196	0.920362	0.460284	0.488118	0.53351	0.393877	0.330001	0.592139	0.333274	0.583246	0.704254	0.503565	0.409104	0.395684	0.516968	0.468198	0.38691	0.590533	0.403624	0.362694	0.577852	0.202206
40.18	0.432484	0.145576	0.086555	0.186429	0.509634	0.311621	0.455738	0.630567	0.572577	0.43081	0.376028	0.77132	0.427717	0.457197	0.594693	0.369095	0.345361	0.546773	0.219834	0.517726	0.638846	0.40739	0.382109	0.343193	0.462599	0.447905	0.321317	0.577368	0.387244	0.469849	0.488277	0.238763
40.32	0.460258	0.127354	0.306429	0.301951	0.670196	0.323512	0.343934	0.576413	0.610801	0.409164	0.392749	0.763347	0.456396	0.440532	0.59199	0.409092	0.386133	0.539306	0.512681	0.593029	0.667294	0.490729	0.433481	0.345285	0.413347	0.315017	0.42862	0.564089	0.470308	0.394172	0.442539	0.215206
40.46	0.466512	0.142976	0.253273	0.253718	0.756326	0.474542	0.611419	0.455349	0.600997	0.418637	0.317803	0.814079	0.406894	0.456224	0.477543	0.374596	0.47242	0.596278	0.410969	0.649152	0.696609	0.320531	0.449012	0.361185	0.458997	0.426656	0.480959	0.553857	0.451	0.389162	0.38605	0.22113
40.6	0.430972	0.132556	0.184693	0.198213	0.501003	0.253773	0.285213	0.52823	0.444483	0.474418	0.407889	0.697171	0.471555	0.42832	0.56718	0.421276	0.392691	0.604777	0.493017	0.523217	0.609374	0.421647	0.401716	0.292759	0.415308	0.396125	0.293611	0.652415	0.459285	0.478939	0.454882	0.175997
40.74	0.458911	0.112866	0.281763	0.383637	0.634361	0.418972	0.368729	0.546153	0.603071	0.474257	0.338574	0.706932	0.440184	0.481914	0.52929	0.535849	0.395275	0.494698	0.416341	0.430495	0.69132	0.401751	0.454577	0.387429	0.443724	0.427049	0.379949	0.635251	0.458747	0.401458	0.387942	0.217635
40.88	0.451929	0.129214	0.226796	0.332894	0.483868	0.473107	0.615042	0.435512	0.590845	0.373072	0.321994	0.797142	0.459227	0.458667	0.499088	0.392128	0.342738	0.541331	0.399604	0.580637	0.716891	0.441557	0.41384	0.37215	0.490483	0.388266	0.277878	0.611427	0.38929	0.413083	0.465604	0.253725
41.02	0.416076	0.123775	0.156312	0.186644	0.46148	0.422584	0.449407	0.486078	0.597628	0.486157	0.289085	0.658812	0.448245	0.26158	0.528939	0.398417	0.339387	0.559501	0.292789	0.492889	0.539874	0.479099	0.43217	0.32348	0.409976	0.435612	0.412381	0.604302	0.33947	0.303735	0.453825	0.232434
41.16	0.431718	0.126559	0.33275	0.188688	0.56072	0.409361	0.362638	0.349286	0.512748	0.522809	0.350134	0.754863	0.492512	0.423383	0.410588	0.355221	0.38742	0.615856	0.451443	0.513415	0.688845	0.393877	0.4627	0.41242	0.41304	0.355095	0.301648	0.55792	0.32731	0.379137	0.485889	0.179832
41.3	0.45644	0.135863	0.183345	0.271041	0.734077	0.343178	0.332961	0.539631	0.651601	0.477612	0.292531	0.760135	0.516977	0.425173	0.528041	0.339691	0.539844	0.532737	0.416623	0.552475	0.619568	0.389603	0.415987	0.463939	0.359742	0.471703	0.468006	0.506668	0.429347	0.426779	0.4957	0.208472
41.44	0.462736	0.127399	0.30185	0.376616	0.678403	0.572176	0.252592	0.534048	0.548951	0.521534	0.302744	0.677422	0.478454	0.44381	0.544135	0.364475	0.347271	0.567813	0.613937	0.560209	0.659106	0.419848	0.437536	0.408574	0.377932	0.467492	0.278554	0.557045	0.407496	0.387468	0.573598	0.22099
41.58	0.447201	0.1234	0.151046	0.298163	0.71681	0.537394	0.397806	0.439132	0.530087	0.481461	0.383281	0.54767	0.431005	0.379887	0.494884	0.332818	0.402754	0.531113	0.518988	0.643668	0.680214	0.497179	0.390374	0.43525	0.385013	0.502951	0.321676	0.553424	0.382086	0.331194	0.473139	0.245564
41.72	0.451043	0.133019	0.202834	0.285423	0.699077	0.458331	0.481345	0.581068	0.615222	0.346624	0.303638	0.729669	0.4107	0.431035	0.448518	0.368815	0.422896	0.480858	0.596515	0.54398	0.657171	0.348616	0.383826	0.371374	0.405762	0.438798	0.498372	0.590825	0.466246	0.434955	0.332255	0.196537
41.86	0.421265	0.115671	0.161782	0.285544	0.537995	0.359731	0.401846	0.517035	0.611195	0.374655	0.349041	0.611	0.363562	0.397849	0.45704	0.320784	0.467651	0.589457	0.324197	0.486174	0.643651	0.542754	0.388531	0.33636	0.385894	0.388206	0.376309	0.458778	0.487568	0.308407	0.478261	0.22669
42	0.438968	0.124758	0.323448	0.168559	0.603338	0.463199	0.186652	0.424001	0.568222	0.419856	0.382491	0.610186	0.469503	0.382967	0.570182	0.311467	0.404681	0.519618	0.466466	0.491793	0.718361	0.326318	0.433069	0.38312	0.463126	0.401242	0.476095	0.576374	0.425635	0.40032	0.563826	0.234919
42.14	0.418289	0.134343	0.095812	0.08612	0.589577	0.470953	0.40232	0.494535	0.505748	0.468482	0.353016	0.666191	0.394875	0.456925	0.577051	0.384273	0.358461	0.46462	0.484206	0.551694	0.54731	0.340574	0.390318	0.410596	0.403901	0.357131	0.223486	0.616648	0.438764	0.351551	0.415782	0.247754
42.28	0.445212	0.142835	0.144497	0.172895	0.601534	0.470599	0.437629	0.589202	0.597277	0.46465	0.302547	0.738382	0.547108	0.413659	0.447755	0.28497	0.383509	0.573795	0.369108	0.500542	0.717898	0.509277	0.385096	0.338383	0.429743	0.398492	0.440648	0.552877	0.366989	0.518131	0.470013	0.189162
42.42	0.456864	0.132139	0.305047	0.284484	0.519504	0.333694	0.495343	0.469913	0.557028	0.47188	0.286008	0.651857	0.459937	0.43752	0.623946	0.419211	0.373731	0.593412	0.498505	0.616	0.709614	0.40826	0.5081	0.356999	0.527801	0.339835	0.300313	0.682551	0.386338	0.331972	0.561864	0.195257
42.56	0.462506	0.128286	0.169221	0.315829	0.650055	0.554168	0.491243	0.508069	0.584619	0.440088	0.322716	0.502965	0.446255	0.390215	0.646914	0.428084	0.454786	0.587219	0.323573	0.580535	0.725393	0.397786	0.436325	0.400912	0.473641	0.478843	0.313526	0.613256	0.416195	0.361234	0.603415	0.258092
42.7	0.44741	0.118526	0.176252	0.371998	0.540953	0.469988	0.474286	0.482744	0.598776	0.489767	0.346418	0.68004	0.43307	0.499021	0.528149	0.358281	0.365435	0.514499	0.256362	0.49968	0.672096	0.377351	0.439871	0.33766	0.434064	0.388958	0.374476	0.598605	0.365383	0.516811	0.569461	0.26183
42.84	0.4646	0.160811	0.183947	0.354603	0.627643	0.512607	0.340307	0.541714	0.588302	0.457346	0.36669	0.963726	0.476943	0.433672	0.616282	0.291871	0.371157	0.586454	0.464509	0.544198	0.731741	0.425049	0.368089	0.441882	0.458719	0.452802	0.307664	0.669638	0.368914	0.3332	0.46728	0.191054
42.98	0.454725	0.118242	0.300676	0.247813	0.587629	0.558941	0.564398	0.501324	0.621175	0.505701	0.345726	0.609932	0.501298	0.387892	0.576836	0.314151	0.416749	0.550399	0.498604	0.470099	0.595782	0.410981	0.418591	0.355887	0.428276	0.483489	0.280345	0.549946	0.303935	0.396667	0.622327	0.236179
43.12	0.433122	0.130345	0.197121	0.288079	0.563419	0.584532	0.319962	0.652386	0.469719	0.380283	0.37436	0.745196	0.497397	0.398034	0.530416	0.339689	0.387271	0.33274	0.377125	0.526831	0.633597	0.362521	0.480919	0.295603	0.396582	0.451802	0.346778	0.564373	0.323967	0.450012	0.515344	0.207602
43.26	0.435202	0.136984	0.261185	0.226271	0.601844	0.4127	0.305733	0.506335	0.58308	0.416583	0.347394	0.671233	0.455542	0.395327	0.508218	0.298799	0.437886	0.458355	0.194256	0.552837	0.741558	0.440304	0.442728	0.320387	0.444587	0.391393	0.412681	0.591184	0.346494	0.478897	0.619077	0.193176
43.4	0.449944	0.139248	0.236163	0.185297	0.53741	0.506873	0.417115	0.511257	0.614379	0.560549	0.338576	0.780119	0.465428	0.297624	0.496792	0.365231	0.365432	0.570171	0.495052	0.544258	0.718979	0.417455	0.410524	0.38043	0.32363	0.56816	0.33941	0.522721	0.429145	0.287695	0.559455	0.252979
43.54	0.486277	0.142957	0.270842	0.354994	0.711468	0.464849	0.536119	0.658367	0.583689	0.411945	0.315188	0.71844	0.451015	0.430595	0.654382	0.413358	0.433863	0.497412	0.556786	0.627939	0.77796	0.34499	0.39057	0.416077	0.441364	0.388618	0.320328	0.704905	0.412971	0.379344	0.629555	0.290382
43.68	0.450792	0.14903	0.371578	0.193995	0.575365	0.379172	0.525907	0.544253	0.48803	0.478408	0.368607	0.720741	0.484824	0.39402	0.627275	0.462721	0.384052	0.464927	0.216111	0.693669	0.773081	0.40137	0.410064	0.386308	0.281809	0.34133	0.367681	0.623846	0.43733	0.370088	0.595447	0.161763
43.82	0.462601	0.139556	0.322157	0.280238	0.570498	0.455541	0.383373	0.515494	0.632077	0.393023	0.288273	0.65499	0.523025	0.463098	0.640919	0.31548	0.417732	0.691775	0.424284	0.623417	0.774103	0.489313	0.541489	0.389373	0.474031	0.444894	0.418761	0.5614	0.365245	0.323653	0.323141	0.177233
43.96	0.438993	0.143679	0.258884	0.123617	0.518128	0.486	0.427163	0.546101	0.555888	0.252401	0.330945	0.733386	0.414725	0.506908	0.527061	0.375191	0.392186	0.628112	0.333126	0.596679	0.657519	0.51184	0.393005	0.278963	0.447817	0.42831	0.283179	0.58714	0.376943	0.38229	0.598716	0.217578
44.1	0.464501	0.135687	0.256845	0.155042	0.516076	0.547851	0.481546	0.485019	0.61809	0.504984	0.288022	0.703139	0.399825	0.472902	0.589921	0.513518	0.474708	0.556122	0.381289	0.546595	0.704486	0.454203	0.377264	0.355991	0.339283	0.499841	0.458619	0.714034	0.371127	0.421486	0.520976	0.226227
44.24	0.459054	0.141213	0.069837	0.385792	0.643479	0.472342	0.526621	0.679089	0.488094	0.481469	0.34525	0.594518	0.434461	0.485131	0.621563	0.379728	0.393538	0.662736	0.592701	0.486954	0.687081	0.287818	0.435902	0.279259	0.456526	0.409632	0.472133	0.543481	0.435872	0.345399	0.472387	0.202828
44.38	0.46379	0.116855	0.352633	0.253127	0.692824	0.567217	0.512989	0.490297	0.535715	0.455585	0.340848	0.495621	0.434994	0.375999	0.540214	0.344027	0.299458	0.542084	0.526017	0.47611	0.758152	0.454742	0.445215	0.432074	0.514345	0.437277	0.422748	0.608316	0.445355	0.348306	0.566025	0.245395
44.52	0.470843	0.138325	0.245953	0.153651	0.609062	0.620602	0.640349	0.402209	0.595702	0.506355	0.379657	0.586218	0.354243	0.354221	0.573067	0.361916	0.401004	0.531405	0.353618	0.681625	0.707074	0.48191	0.400115	0.374249	0.532581	0.461987	0.378617	0.573397	0.476923	0.416562	0.682274	0.28875
44.66	0.44338	0.13787	0.060055	0.201686	0.561155	0.485363	0.248375	0.457353	0.606612	0.525884	0.394475	0.556791	0.412744	0.401283	0.578696	0.367055	0.404359	0.671785	0.36418	0.476221	0.687025	0.51055	0.441315	0.328612	0.471548	0.393853	0.471306	0.652153	0.445446	0.377639	0.465589	0.282293
44.8	0.469894	0.101365	0.30533	0.373889	0.558751	0.467538	0.359394	0.4735	0.565064	0.59396	0.379994	0.566573	0.46943	0.363559	0.545802	0.448649	0.405278	0.586595	0.589569	0.60847	0.689939	0.406136	0.497437	0.502305	0.408086	0.520121	0.415497	0.501922	0.425881	0.399908	0.440204	0.228042
44.94	0.461838	0.142988	0.171613	0.22736	0.736532	0.56307	0.42206	0.317683	0.511786	0.457231	0.410633	0.694716	0.350273	0.39966	0.583752	0.263081	0.411315	0.562752	0.575876	0.644152	0.695083	0.367552	0.423205	0.46066	0.407266	0.496707	0.456143	0.596203	0.4397	0.438865	0.553573	0.21665
45.08	0.440005	0.125592	0.26991	0.169703	0.562496	0.560884	0.417901	0.615242	0.502375	0.445584	0.323829	0.577271	0.359462	0.406178	0.558059	0.297301	0.420896	0.518488	0.318806	0.671847	0.508707	0.32464	0.528562	0.411028	0.405223	0.460805	0.545362	0.578031	0.361916	0.413112	0.496583	0.169938
45.22	0.464491	0.142254	0.079941	0.197423	0.572236	0.608574	0.361089	0.562503	0.474736	0.4846	0.329195	0.750757	0.468781	0.460868	0.665501	0.481153	0.426163	0.664913	0.370215	0.522973	0.52511	0.439508	0.504029	0.425094	0.516297	0.459036	0.531182	0.586326	0.379628	0.342522	0.531906	0.212469
45.36	0.448764	0.144948	0.145352	0.188348	0.692089	0.456533	0.372961	0.419444	0.479583	0.504619	0.391241	0.906557	0.4432	0.466702	0.528983	0.393339	0.394977	0.540902	0.380718	0.549826	0.578205	0.322927	0.521272	0.407207	0.332037	0.410674	0.354247	0.564806	0.437875	0.499901	0.536882	0.241507
45.5	0.457422	0.126497	0.290052	0.212937	0.527243	0.457677	0.43956	0.593134	0.581768	0.536905	0.313419	0.733799	0.417806	0.395919	0.612351	0.448177	0.379145	0.497253	0.297393	0.562176	0.666912	0.436628	0.428224	0.355912	0.442221	0.418794	0.412641	0.595069	0.434791	0.400016	0.610806	0.223924
45.64	0.442556	0.12787	0.221552	0.196462	0.543166	0.501719	0.445877	0.515567	0.521981	0.409557	0.331264	0.610332	0.482525	0.423925	0.599383	0.298423	0.441306	0.59441	0.46728	0.610267	0.707836	0.410609	0.466197	0.434863	0.363675	0.401448	0.224354	0.523595	0.391537	0.346774	0.551016	0.239788
45.78	0.433527	0.129546	0.088693	0.353032	0.701907	0.469006	0.499244	0.429186	0.614657	0.468258	0.289227	0.619941	0.36477	0.39133	0.503564	0.362295	0.412864	0.552668	0.363227	0.482092	0.566593	0.481569	0.384127	0.418103	0.337809	0.397009	0.249428	0.655189	0.403459	0.369333	0.511889	0.265332
45.92	0.436915	0.127033	0.084254	0.256205	0.455257	0.535621	0.265502	0.479558	0.567005	0.434194	0.259363	0.631067	0.425635	0.467983	0.589003	0.402558	0.384751	0.479882	0.664071	0.573127	0.592986	0.515741	0.411214	0.384218	0.416294	0.425445	0.362162	0.510099	0.399279	0.40763	0.475216	0.252118
46.06	0.446826	0.112889	0.343733	0.346352	0.494097	0.544735	0.482379	0.492344	0.570887	0.493209	0.301257	0.699753	0.378333	0.3648	0.535563	0.315412	0.32969	0.608962	0.478724	0.452783	0.593443	0.398625	0.463471	0.418051	0.487826	0.464516	0.437041	0.428986	0.305925	0.394727	0.609706	0.169458
46.2	0.475866	0.141253	0.446911	0.158042	0.647288	0.375749	0.493571	0.4961	0.606403	0.364095	0.465855	0.885505	0.394736	0.378122	0.550656	0.334769	0.45129	0.613655	0.541371	0.557675	0.66654	0.504246	0.555752	0.431482	0.488874	0.390644	0.312176	0.651553	0.460482	0.395296	0.384563	0.272591
46.34	0.459974	0.149081	0.383687	0.207278	0.730076	0.452696	0.304723	0.450559	0.568529	0.495103	0.360616	0.906234	0.395568	0.399917	0.586994	0.392493	0.422848	0.616921	0.543188	0.507851	0.640776	0.446252	0.439841	0.357953	0.471775	0.358589	0.219877	0.549425	0.407773	0.375697	0.570123	0.235852
46.48	0.46411	0.111074	0.174762	0.265387	0.51091	0.36389	0.502355	0.511424	0.577639	0.383006	0.393509	0.53474	0.399626	0.370467	0.634275	0.460271	0.520565	0.538093	0.45505	0.562103	0.611854	0.56648	0.520725	0.305933	0.477037	0.442303	0.43597	0.621898	0.40045	0.45229	0.602797	0.327488
46.62	0.457856	0.134755	0.228797	0.269514	0.636996	0.419811	0.56027	0.480193	0.623904	0.568317	0.366023	0.580616	0.307234	0.340682	0.510724	0.470224	0.514961	0.624342	0.496249	0.494751	0.742291	0.446102	0.409467	0.448373	0.383671	0.470503	0.226509	0.606723	0.394915	0.258882	0.581345	0.273294
46.76	0.453761	0.120818	0.255997	0.220663	0.493353	0.441063	0.379197	0.465615	0.55628	0.562899	0.368523	0.629405	0.394457	0.41942	0.51276	0.392356	0.407599	0.532995	0.615779	0.654862	0.677309	0.48865	0.475202	0.248783	0.521545	0.512937	0.438589	0.535393	0.358249	0.307186	0.478966	0.2668
46.9	0.454631	0.153853	0.053501	0.334688	0.773579	0.429739	0.442694	0.425414	0.607482	0.426207	0.369497	0.644474	0.477326	0.322218	0.557801	0.375998	0.308186	0.665627	0.708631	0.500507	0.649791	0.419825	0.458745	0.400398	0.389349	0.524748	0.349151	0.507552	0.409581	0.228983	0.603051	0.274177
47.04	0.460328	0.139931	0.271186	0.324598	0.749819	0.495613	0.4442	0.631776	0.567168	0.485409	0.286531	0.714429	0.385718	0.377159	0.535578	0.373653	0.41263	0.656788	0.591492	0.504706	0.688402	0.374965	0.412247	0.434499	0.382669	0.459196	0.291666	0.610591	0.390498	0.315682	0.425761	0.21521
47.18	0.468056	0.142841	0.190915	0.238655	0.565913	0.586928	0.580267	0.564249	0.702461	0.503691	0.283234	0.779299	0.454325	0.434872	0.539997	0.443311	0.465921	0.598349	0.65213	0.401337	0.627536	0.463473	0.366273	0.400238	0.467252	0.510884	0.396626	0.556805	0.358373	0.376846	0.335236	0.196273
47.32	0.440443	0.114641	0.358599	0.363989	0.560019	0.446423	0.292213	0.533474	0.486067	0.510677	0.34145	0.639466	0.415229	0.40664	0.583068	0.400745	0.440708	0.476831	0.506433	0.480848	0.654521	0.467772	0.481197	0.342933	0.374554	0.48258	0.178899	0.573086	0.480674	0.314286	0.441763	0.17815
47.46	0.45682	0.143527	0.187252	0.404293	0.807799	0.499115	0.510843	0.538397	0.649618	0.431632	0.332531	0.673625	0.393649	0.474762	0.531044	0.311255	0.349525	0.618859	0.569096	0.44993	0.644206	0.383972	0.401797	0.286439	0.403964	0.499512	0.398804	0.647759	0.33001	0.36599	0.399495	0.209436
47.6	0.45217	0.131183	0.36507	0.307802	0.559462	0.391176	0.407627	0.727621	0.638712	0.421351	0.288819	0.463949	0.382304	0.371692	0.472293	0.333733	0.346709	0.606082	0.698436	0.513012	0.725294	0.480529	0.41	0.353537	0.436319	0.391979	0.377659	0.593303	0.3938	0.426741	0.489324	0.190762
47.74	0.446325	0.140604	0.333509	0.297127	0.668513	0.468644	0.507047	0.545728	0.643332	0.360703	0.315358	0.71189	0.398795	0.369782	0.534362	0.362992	0.362024	0.624452	0.313772	0.56603	0.692566	0.522682	0.408908	0.349941	0.389994	0.505895	0.280168	0.629077	0.406145	0.227214	0.360396	0.232698
47.88	0.451036	0.135318	0.270306	0.218344	0.647785	0.42987	0.39096	0.51547	0.513337	0.439902	0.315406	0.612128	0.535283	0.400769	0.480804	0.351393	0.33244	0.60821	0.326332	0.503444	0.764043	0.542748	0.470764	0.395205	0.441592	0.566353	0.333134	0.612664	0.500169	0.28458	0.541004	0.18663
48.02	0.45657	0.136039	0.203147	0.325126	0.548395	0.36405	0.444889	0.57727	0.723177	0.425452	0.297724	0.707035	0.456856	0.396401	0.537632	0.338577	0.423463	0.641239	0.62526	0.48666	0.773287	0.38285	0.40955	0.395595	0.446552	0.403634	0.373897	0.507846	0.334383	0.491446	0.355193	0.300531
48.16	0.45687	0.142137	0.221315	0.262972	0.588216	0.39881	0.398742	0.51829	0.675741	0.434329	0.319976	0.8649	0.439143	0.373861	0.589743	0.353711	0.414847	0.718185	0.38296	0.488981	0.627639	0.435218	0.447306	0.361803	0.439196	0.407471	0.331395	0.531735	0.418379	0.385439	0.594705	0.281094
48.3	0.445655	0.127829	0.170073	0.317951	0.557616	0.567336	0.269865	0.490443	0.562247	0.4735	0.399258	0.506825	0.380952	0.38658	0.627258	0.446029	0.424403	0.635623	0.444145	0.48561	0.791748	0.347376	0.387858	0.442478	0.401131	0.413255	0.395958	0.590515	0.39034	0.363564	0.481923	0.217799
48.44	0.464151	0.133173	0.218091	0.360216	0.778973	0.47172	0.536125	0.522599	0.587473	0.386414	0.367935	0.724486	0.427053	0.342034	0.603456	0.467991	0.394494	0.623625	0.370792	0.447307	0.615407	0.356615	0.44922	0.259292	0.531319	0.373835	0.495059	0.610802	0.473298	0.360729	0.499339	0.268844
48.58	0.461554	0.163818	0.303095	0.259935	0.565799	0.347834	0.365524	0.523638	0.640818	0.373435	0.388876	0.781582	0.384544	0.400835	0.627373	0.366985	0.454058	0.658283	0.542321	0.592595	0.853158	0.351438	0.427323	0.19881	0.475309	0.441681	0.41018	0.683662	0.450572	0.224118	0.550012	0.202815
48.72	0.474306	0.1185	0.272354	0.367336	0.431595	0.582471	0.407276	0.490013	0.674016	0.46279	0.391573	0.748046	0.470648	0.458632	0.577023	0.387712	0.433808	0.537544	0.45144	0.61886	0.675944	0.405961	0.442629	0.370315	0.424804	0.421153	0.493246	0.616961	0.463507	0.44704	0.519256	0.185232
48.86	0.456427	0.132305	0.151991	0.376832	0.444892	0.473557	0.311723	0.510147	0.65391	0.46544	0.359705	0.698424	0.562723	0.417532	0.630225	0.378275	0.501156	0.588583	0.566465	0.433981	0.674105	0.336568	0.423775	0.373116	0.416836	0.515671	0.33504	0.669127	0.383574	0.33854	0.44967	0.251241
49	0.48701	0.148442	0.232379	0.323256	0.696336	0.560933	0.468888	0.500381	0.6096	0.504954	0.407713	0.905685	0.4658	0.524717	0.684883	0.364559	0.429709	0.755334	0.564084	0.453086	0.616659	0.450376	0.449013	0.331736	0.402485	0.4263	0.488485	0.591277	0.404587	0.308465	0.437734	0.250896
49.14	0.458036	0.167998	0.093189	0.196467	0.459629	0.452973	0.290981	0.576131	0.628495	0.389487	0.352243	0.759804	0.591843	0.463462	0.61733	0.279835	0.367766	0.557828	0.886434	0.547453	0.646765	0.451365	0.459048	0.354169	0.467825	0.416361	0.277579	0.608163	0.350796	0.390929	0.52375	0.282972
49.28	0.462849	0.133927	0.356222	0.339914	0.659153	0.421811	0.333637	0.498092	0.493416	0.593951	0.325327	0.766532	0.548354	0.48039	0.574731	0.349516	0.428615	0.589422	0.66564	0.507346	0.645453	0.390816	0.33514	0.352703	0.384739	0.444358	0.252305	0.547847	0.53332	0.399039	0.48498	0.182707
49.42	0.46461	0.14385	0.186684	0.16452	0.649135	0.484398	0.376271	0.577908	0.607283	0.441235	0.342221	0.684863	0.525216	0.330083	0.55611	0.450238	0.374389	0.660068	0.426087	0.617265	0.641771	0.504749	0.404754	0.239037	0.474486	0.36547	0.613065	0.571872	0.461352	0.37015	0.573377	0.264249
49.56	0.454026	0.129583	0.166112	0.341199	0.678052	0.462788	0.409911	0.561896	0.638978	0.379141	0.441117	0.722164	0.566995	0.360781	0.557946	0.381216	0.353271	0.519173	0.318008	0.562637	0.665475	0.472319	0.364768	0.354973	0.449058	0.381006	0.412697	0.593183	0.401342	0.423977	0.425631	0.254975
49.7	0.47315	0.124629	0.241628	0.182471	0.595777	0.539064	0.435859	0.685739	0.538071	0.475667	0.412462	0.590321	0.491363	0.375543	0.621153	0.414794	0.397537	0.573479	0.412171	0.517562	0.716116	0.451514	0.385623	0.430094	0.511835	0.443802	0.420004	0.639639	0.416531	0.449431	0.581309	0.247947
49.84	0.469625	0.121503	0.244968	0.289551	0.55103	0.428582	0.50787	0.668199	0.651105	0.520435	0.399671	0.563803	0.44212	0.368609	0.588791	0.399942	0.382441	0.584318	0.369571	0.628489	0.695201	0.391843	0.343877	0.389643	0.529334	0.457872	0.396032	0.610428	0.468966	0.410369	0.544634	0.261064
49.98	0.44298	0.121598	0.265367	0.287275	0.566823	0.540464	0.343353	0.507133	0.572872	0.439458	0.386046	0.734206	0.376027	0.395049	0.538121	0.343299	0.305812	0.532277	0.537548	0.52647	0.658165	0.469886	0.416252	0.400082	0.44011	0.450393	0.383483	0.611931	0.378478	0.350985	0.309169	0.222856
50.12	0.445319	0.125151	0.187843	0.243992	0.61173	0.448806	0.458389	0.489349	0.522332	0.484617	0.305586	0.618936	0.364062	0.479817	0.541614	0.376641	0.466984	0.572232	0.320915	0.592309	0.693197	0.441526	0.397317	0.351193	0.419269	0.517657	0.317372	0.578108	0.420352	0.330017	0.569651	0.237759
50.26	0.432317	0.129518	0.086087	0.135324	0.504103	0.344019	0.560757	0.320447	0.598586	0.502403	0.392691	0.542265	0.440721	0.44668	0.521485	0.418046	0.401188	0.517323	0.416016	0.548737	0.714395	0.426703	0.431022	0.320774	0.376711	0.404558	0.368614	0.628861	0.378371	0.432827	0.482839	0.306952
50.4	0.448471	0.136069	0.09089	0.313777	0.575565	0.459404	0.364098	0.413058	0.567851	0.583629	0.349894	0.797099	0.356133	0.372565	0.576766	0.427198	0.371959	0.506432	0.496232	0.507834	0.669665	0.482522	0.45378	0.324569	0.421139	0.478988	0.45417	0.510591	0.441607	0.363877	0.538753	0.184098
50.54	0.437305	0.115818	0.223549	0.202978	0.722914	0.382699	0.47544	0.411255	0.528729	0.517199	0.333542	0.598915	0.429014	0.411675	0.539554	0.508327	0.475288	0.548215	0.232122	0.469872	0.552602	0.493838	0.400712	0.36486	0.383896	0.532595	0.412485	0.487776	0.363383	0.447534	0.411251	0.25693
50.68	0.445739	0.132451	0.064512	0.286905	0.659517	0.384305	0.501964	0.601664	0.568377	0.431086	0.363648	0.662946	0.401544	0.367815	0.602719	0.437125	0.417018	0.599693	0.414262	0.557135	0.571196	0.501043	0.386014	0.358427	0.465307	0.497142	0.43922	0.559666	0.294209	0.263248	0.398683	0.31579
50.82	0.471909	0.132162	0.225105	0.342375	0.585813	0.396539	0.493588	0.378171	0.560938	0.510771	0.3853	0.861447	0.49877	0.394044	0.499298	0.398007	0.417943	0.514572	0.325774	0.631547	0.685607	0.597337	0.433928	0.438769	0.496454	0.578483	0.462977	0.527269	0.376617	0.37396	0.547448	0.218413
50.96	0.443649	0.113107	0.237968	0.253209	0.653379	0.423948	0.392291	0.57094	0.517587	0.507017	0.305353	0.635859	0.464325	0.421739	0.486084	0.337424	0.435565	0.516807	0.42296	0.524285	0.640772	0.409951	0.434883	0.378734	0.511085	0.367279	0.382513	0.562866	0.416909	0.409972	0.490447	0.197332
51.1	0.436132	0.135622	0.232838	0.17988	0.599018	0.396336	0.29606	0.394795	0.511788	0.471848	0.411378	0.677703	0.45604	0.441406	0.533781	0.316003	0.336009	0.59975	0.60047	0.642518	0.516418	0.408626	0.421706	0.32886	0.458017	0.473387	0.399259	0.586185	0.431772	0.198568	0.57306	0.190476
51.24	0.434733	0.112018	0.333654	0.297039	0.650345	0.405841	0.367633	0.528229	0.597421	0.377008	0.326857	0.622	0.438495	0.425917	0.539698	0.34696	0.419493	0.503148	0.474583	0.469948	0.659483	0.438389	0.44933	0.371458	0.351123	0.329365	0.358043	0.57184	0.416415	0.329553	0.456388	0.186322
51.38	0.46149	0.134947	0.278876	0.35028	0.554551	0.440152	0.241218	0.465787	0.659567	0.528078	0.337708	0.774908	0.426459	0.376821	0.593405	0.389965	0.428111	0.5392	0.583387	0.600227	0.696803	0.486746	0.453407	0.383577	0.417859	0.380291	0.313568	0.583977	0.450575	0.342287	0.558535	0.208366
51.52	0.448172	0.138273	0.211397	0.296999	0.423274	0.381286	0.52544	0.289658	0.64279	0.491704	0.349931	0.648129	0.523053	0.357495	0.643066	0.496644	0.435326	0.479364	0.469237	0.534401	0.758098	0.352066	0.408301	0.454415	0.456181	0.325361	0.259604	0.572533	0.368021	0.402876	0.67358	0.214942
51.66	0.456146	0.149586	-0.000972	0.116897	0.604197	0.338193	0.395271	0.488135	0.542137	0.496777	0.355844	0.794144	0.486066	0.40379	0.581616	0.427997	0.500477	0.608779	0.504021	0.503892	0.641542	0.468657	0.440412	0.452195	0.501733	0.443371	0.409027	0.554679	0.37448	0.422353	0.556942	0.271737
51.8	0.445416	0.127611	0.171476	0.363265	0.742603	0.47128	0.354246	0.400336	0.608705	0.520038	0.303887	0.549289	0.446205	0.391847	0.582362	0.468203	0.335312	0.482283	0.458051	0.530229	0.627924	0.358533	0.415581	0.37485	0.359489	0.415109	0.391714	0.519545	0.341656	0.464803	0.691656	0.222
51.94	0.470647	0.124329	0.3418	0.256884	0.61502	0.331531	0.385486	0.536042	0.663041	0.487245	0.30875	0.744612	0.429021	0.386204	0.55737	0.391984	0.385791	0.505225	0.506437	0.520856	0.641696	0.530507	0.440987	0.336721	0.556371	0.427088	0.367843	0.62452	0.427209	0.463244	0.653557	0.296364
52.08	0.445088	0.131607	0.191749	0.180701	0.587725	0.472023	0.361455	0.536554	0.660589	0.40182	0.307416	0.659614	0.425623	0.478953	0.561239	0.501534	0.413017	0.466212	0.546267	0.628665	0.681063	0.34102	0.430975	0.379717	0.40399	0.452204	0.378797	0.519953	0.333062	0.344521	0.480693	0.225498
52.22	0.449646	0.11639	0.190428	0.409245	0.573997	0.459237	0.371631	0.439826	0.666379	0.481204	0.342298	0.597849	0.488733	0.449783	0.528714	0.355678	0.437575	0.47987	0.664501	0.562147	0.622673	0.439497	0.442982	0.371905	0.517475	0.393087	0.390476	0.5107	0.370218	0.43269	0.305407	0.193165
52.36	0.478148	0.133423	0.239955	0.291118	0.548697	0.478183	0.380672	0.656329	0.633493	0.571659	0.35527	0.784072	0.58211	0.371714	0.549665	0.353312	0.458608	0.568177	0.50067	0.637714	0.668328	0.320863	0.434261	0.430658	0.4169	0.341688	0.548679	0.637021	0.372832	0.418175	0.480045	0.313575
52.5	0.473949	0.134788	0.352779	0.261669	0.602643	0.556745	0.511389	0.665847	0.57196	0.351275	0.305394	0.749922	0.56234	0.482333	0.629173	0.44376	0.385565	0.556718	0.392317	0.576255	0.718926	0.392112	0.446557	0.377796	0.447847	0.495511	0.426529	0.628793	0.443534	0.364463	0.293121	0.22519
52.64	0.48006	0.158805	0.264473	0.241047	0.701072	0.522467	0.476809	0.618227	0.613387	0.450103	0.341789	0.901793	0.49247	0.351931	0.694727	0.366693	0.390401	0.60606	0.460135	0.465025	0.735187	0.35004	0.514594	0.359264	0.395716	0.542963	0.49013	0.605942	0.402229	0.357127	0.517985	0.172001
52.78	0.474053	0.145124	0.179112	0.406295	0.544421	0.467535	0.526828	0.697879	0.578881	0.404354	0.295597	0.911529	0.463994	0.500475	0.560954	0.414084	0.34033	0.501852	0.482997	0.549985	0.67349	0.422681	0.401767	0.275511	0.409043	0.445216	0.487351	0.659784	0.41262	0.404798	0.542152	0.260083
52.92	0.437182	0.115426	0.236711	0.205915	0.427612	0.256539	0.413106	0.475147	0.547293	0.503298	0.406097	0.629067	0.395671	0.484914	0.581989	0.423862	0.331937	0.632863	0.471593	0.54187	0.631081	0.437289	0.439631	0.347714	0.411963	0.481239	0.449164	0.554158	0.373978	0.369498	0.432504	0.221768
53.06	0.453391	0.166072	0.328221	0.069899	0.558546	0.338967	0.478824	0.402842	0.617427	0.561948	0.325525	0.875285	0.582515	0.424245	0.419457	0.415215	0.288742	0.559953	0.716197	0.532364	0.547406	0.53243	0.4338	0.338648	0.479063	0.376914	0.491877	0.642171	0.368703	0.201158	0.54288	0.150521
53.2	0.445208	0.148489	0.227465	0.202622	0.520197	0.466547	0.45109	0.497589	0.620268	0.569617	0.287586	0.796226	0.430708	0.370893	0.640789	0.325626	0.392887	0.471344	0.526059	0.520734	0.682865	0.290575	0.415962	0.419901	0.378547	0.387012	0.352856	0.694737	0.368225	0.30375	0.54345	0.200109
53.34	0.465839	0.122895	0.350249	0.200484	0.515275	0.392076	0.618272	0.608214	0.600709	0.539623	0.24724	0.704332	0.44598	0.422895	0.541025	0.446788	0.44603	0.524466	0.494914	0.56077	0.60189	0.510492	0.492028	0.287653	0.46435	0.494841	0.260037	0.585832	0.381515	0.432496	0.515842	0.288841
53.48	0.450923	0.116148	0.228094	0.289022	0.462948	0.353925	0.324604	0.468871	0.498011	0.53423	0.232235	0.63869	0.385198	0.418333	0.530258	0.529243	0.412834	0.590226	0.528572	0.577749	0.662342	0.406138	0.405834	0.394592	0.523805	0.472028	0.511322	0.586586	0.380528	0.34482	0.556988	0.279677
53.62	0.464906	0.153493	0.020762	0.185497	0.453895	0.44555	0.640141	0.565462	0.59867	0.470512	0.334981	0.727734	0.445123	0.416908	0.619307	0.462584	0.303586	0.500162	0.645201	0.579772	0.725944	0.371756	0.407894	0.45011	0.504881	0.332534	0.492638	0.612126	0.407095	0.445168	0.505885	0.27531
53.76	0.461217	0.111764	0.285327	0.32379	0.451369	0.596738	0.403508	0.505981	0.663818	0.473744	0.365119	0.622979	0.401518	0.36064	0.607659	0.483687	0.442602	0.526516	0.567076	0.488976	0.6509	0.484596	0.452561	0.428913	0.500186	0.365012	0.276724	0.598688	0.409392	0.429453	0.440925	0.228107
53.9	0.440336	0.137674	0.16721	0.259189	0.534377	0.476136	0.262297	0.521032	0.545947	0.500284	0.355388	0.844058	0.384419	0.443983	0.616197	0.39443	0.439496	0.538946	0.427773	0.581007	0.641154	0.477723	0.406391	0.343013	0.386126	0.444132	0.466926	0.526335	0.310955	0.259964	0.377715	0.277482
54.04	0.467321	0.127013	0.298012	0.308277	0.68982	0.491598	0.457579	0.445144	0.52419	0.513343	0.398804	0.729969	0.413717	0.34006	0.519236	0.499494	0.417105	0.526269	0.503132	0.507561	0.75759	0.461879	0.404696	0.258135	0.466883	0.454746	0.356788	0.604171	0.454159	0.420895	0.595043	0.201329
54.18	0.453532	0.113669	0.407919	0.240895	0.503887	0.390182	0.397793	0.414037	0.619505	0.499128	0.329416	0.763592	0.505268	0.436794	0.538127	0.445757	0.314967	0.634114	0.439675	0.523057	0.646018	0.365128	0.478632	0.416034	0.469975	0.406645	0.490461	0.517106	0.357944	0.328462	0.440055	0.285392
54.32	0.457127	0.148094	0.167668	0.337253	0.488334	0.416222	0.276342	0.656748	0.550529	0.512738	0.352914	0.873015	0.471826	0.408415	0.536651	0.430941	0.418867	0.585872	0.376757	0.554968	0.728164	0.324891	0.360697	0.436345	0.413585	0.478543	0.320667	0.631418	0.336156	0.371021	0.604881	0.291384
54.46	0.462615	0.125632	0.280135	0.379032	0.794405	0.566402	0.438634	0.477326	0.568164	0.433193	0.378212	0.500687	0.391836	0.406164	0.565585	0.434784	0.324911	0.539255	0.49574	0.580317	0.695154	0.436778	0.445364	0.365915	0.470639	0.463974	0.261984	0.534292	0.449023	0.351114	0.637438	0.211978
54.6	0.464662	0.150263	0.314934	0.201849	0.415134	0.431985	0.541489	0.529373	0.497858	0.540308	0.353051	0.907037	0.431997	0.47936	0.679381	0.517711	0.356221	0.591337	0.345273	0.510174	0.717792	0.477683	0.382541	0.230878	0.428527	0.559412	0.372991	0.609827	0.305002	0.475931	0.490763	0.244036
54.74	0.486761	0.102979	0.526726	0.393845	0.490058	0.55566	0.457344	0.400767	0.571389	0.553637	0.395458	0.541392	0.364945	0.477641	0.665255	0.342008	0.383717	0.624651	0.344286	0.52335	0.675312	0.462745	0.489216	0.525819	0.447232	0.527119	0.465249	0.670488	0.441246	0.404213	0.605637	0.276423
54.88	0.465189	0.119935	0.377452	0.329121	0.448667	0.511037	0.601959	0.476494	0.574131	0.530958	0.341072	0.707177	0.451271	0.458945	0.626613	0.396734	0.420741	0.568442	0.385693	0.56049	0.704247	0.449426	0.370256	0.262877	0.471631	0.516504	0.426745	0.618593	0.385248	0.405742	0.370278	0.207127
55.02	0.462294	0.136967	0.316857	0.414521	0.61126	0.489883	0.487522	0.42308	0.561907	0.487414	0.307543	0.848158	0.419428	0.366597	0.631373	0.470798	0.411079	0.504902	0.653472	0.587061	0.679764	0.359953	0.412761	0.351925	0.384972	0.387725	0.323789	0.506764	0.289726	0.309508	0.602031	0.267048
55.16	0.455981	0.129502	0.313653	0.404713	0.508676	0.421253	0.290955	0.68342	0.569984	0.461476	0.326308	0.718095	0.365748	0.408166	0.500953	0.467197	0.314438	0.560119	0.506171	0.5973	0.661169	0.475544	0.428527	0.353176	0.53776	0.503433	0.349386	0.680693	0.345816	0.308706	0.391904	0.224698
55.3	0.449739	0.107459	0.326307	0.3422	0.552411	0.430534	0.46203	0.474105	0.506037	0.452373	0.30879	0.523508	0.48635	0.376223	0.589552	0.285225	0.335436	0.505474	0.503119	0.589286	0.664016	0.556055	0.525609	0.407245	0.362927	0.372765	0.565204	0.59273	0.418917	0.32532	0.418704	0.233704
55.44	0.451079	0.106832	0.385024	0.328027	0.52835	0.400129	0.446329	0.447828	0.528581	0.508106	0.373625	0.725288	0.419478	0.477013	0.530281	0.328916	0.399855	0.634468	0.51207	0.548847	0.612946	0.446367	0.372764	0.319701	0.406121	0.414614	0.439013	0.546279	0.494331	0.32571	0.425348	0.206951
55.58	0.469184	0.174889	0.192148	0.198766	0.654273	0.422676	0.511959	0.616365	0.566762	0.440036	0.316587	0.946366	0.3958	0.415534	0.560395	0.484922	0.43782	0.673182	0.065795	0.591434	0.685285	0.411249	0.454747	0.374652	0.558522	0.448585	0.340632	0.61844	0.466755	0.380303	0.596156	0.249375
55.72	0.470036	0.138375	0.259661	0.34585	0.719678	0.500969	0.495618	0.528591	0.562711	0.390748	0.383169	0.814245	0.42834	0.418889	0.588458	0.346877	0.393482	0.633162	0.38134	0.584185	0.691099	0.453193	0.417974	0.336048	0.425268	0.422528	0.371732	0.671698	0.362885	0.386507	0.544273	0.241889
55.86	0.450368	0.143967	0.306429	0.389895	0.591001	0.430953	0.236344	0.521579	0.535514	0.527317	0.303798	0.870085	0.424838	0.449032	0.584394	0.464799	0.378453	0.593728	0.370865	0.612365	0.66931	0.513455	0.446988	0.286557	0.424565	0.400321	0.409188	0.568397	0.382427	0.252021	0.384042	0.18238
56	0.441184	0.128763	0.226952	0.237458	0.432773	0.455726	0.311012	0.371043	0.578504	0.428209	0.355565	0.66111	0.439736	0.337188	0.541127	0.284245	0.462719	0.51032	0.467981	0.596321	0.744072	0.398828	0.463814	0.34042	0.445145	0.472846	0.407589	0.488169	0.38765	0.478179	0.687659	0.223147
56.14	0.461852	0.127547	0.392481	0.287153	0.564719	0.394263	0.333897	0.507827	0.688135	0.389876	0.283129	0.723347	0.450915	0.532061	0.523416	0.460879	0.386148	0.633744	0.495119	0.603174	0.707315	0.301889	0.42948	0.356074	0.397405	0.377537	0.390174	0.593952	0.431075	0.449933	0.519661	0.25079
56.28	0.478481	0.135348	0.220496	0.21423	0.60747	0.405003	0.412395	0.551323	0.592394	0.304397	0.365694	0.794787	0.459057	0.432949	0.603205	0.525018	0.458767	0.670602	0.59271	0.591204	0.679244	0.555809	0.447675	0.414835	0.465566	0.439169	0.389037	0.47198	0.457842	0.431235	0.554952	0.245387
56.42	0.441917	0.114719	0.487196	0.197238	0.440335	0.38413	0.463679	0.481955	0.603544	0.428752	0.365567	0.595705	0.341017	0.432636	0.574515	0.27058	0.360925	0.550934	0.367498	0.415382	0.70051	0.364679	0.481343	0.375527	0.404946	0.470254	0.5274	0.547992	0.400419	0.349837	0.619345	0.253662
56.56	0.481236	0.107694	0.286762	0.357841	0.607738	0.5223	0.608283	0.578507	0.630853	0.422122	0.421774	0.6306	0.439875	0.454624	0.510779	0.381522	0.428304	0.596018	0.426747	0.493194	0.636714	0.362638	0.411175	0.411723	0.472131	0.513673	0.579734	0.511965	0.426496	0.417976	0.655978	0.239039
56.7	0.444239	0.146018	0.192064	0.223896	0.584816	0.603911	0.342072	0.696134	0.554657	0.271352	0.327701	0.732046	0.401046	0.472757	0.53765	0.301234	0.403993	0.569758	0.494305	0.576914	0.659852	0.3585	0.384316	0.361757	0.407401	0.432504	0.314991	0.515804	0.450041	0.339955	0.605461	0.210276
56.84	0.455981	0.128632	0.198009	0.328933	0.622683	0.389334	0.401482	0.543949	0.692729	0.489753	0.302136	0.732672	0.406465	0.387662	0.546261	0.501539	0.40472	0.631373	0.536123	0.507076	0.649045	0.420144	0.39888	0.371585	0.509023	0.407073	0.294716	0.480635	0.411506	0.407127	0.477602	0.229198
56.98	0.457851	0.129558	0.163053	0.335539	0.62947	0.433826	0.47838	0.413478	0.606652	0.485457	0.358043	0.642088	0.453826	0.317177	0.512917	0.319601	0.296985	0.582983	0.340127	0.47183	0.761096	0.37202	0.475366	0.485308	0.415688	0.557439	0.450501	0.667511	0.480332	0.432017	0.507511	0.28931
57.12	0.46814	0.168213	0.051212	0.191384	0.791877	0.573564	0.441741	0.380562	0.588472	0.41564	0.399249	0.782261	0.438045	0.392201	0.574037	0.467743	0.407885	0.523212	0.559355	0.660696	0.700645	0.398309	0.408385	0.355505	0.27191	0.466711	0.681853	0.592146	0.406802	0.415834	0.507933	0.199019
57.26	0.483802	0.118749	0.274579	0.365282	0.527639	0.422519	0.440919	0.446953	0.696176	0.526981	0.419278	0.775183	0.421761	0.37522	0.524932	0.434113	0.394296	0.629401	0.512615	0.575072	0.630447	0.44128	0.469165	0.300488	0.5071	0.527321	0.404371	0.604909	0.478734	0.487062	0.630665	0.269591
57.4	0.466296	0.144168	0.312722	0.23783	0.735894	0.439606	0.638547	0.342536	0.511745	0.498079	0.437355	0.822098	0.345668	0.374778	0.621887	0.343969	0.458008	0.530544	0.338174	0.649482	0.571055	0.449628	0.455445	0.331651	0.449514	0.475067	0.349982	0.670158	0.472333	0.537124	0.372859	0.215151
57.54	0.448959	0.119827	0.213367	0.32617	0.549377	0.444995	0.448833	0.454828	0.550247	0.4134	0.314754	0.558223	0.429446	0.388585	0.550616	0.402198	0.36864	0.581084	0.462902	0.545437	0.811673	0.46305	0.413965	0.278476	0.406293	0.447638	0.544105	0.569202	0.513479	0.436009	0.326689	0.255081
57.68	0.445193	0.131706	0.300978	0.255517	0.608891	0.489035	0.426045	0.454946	0.549126	0.424208	0.346193	0.744028	0.460461	0.366288	0.625092	0.346927	0.399035	0.542855	0.482447	0.64455	0.725572	0.399625	0.459138	0.303275	0.377555	0.383876	0.441479	0.480785	0.450255	0.33253	0.36495	0.170112
57.82	0.469603	0.134298	0.064244	0.334857	0.444387	0.512467	0.471569	0.497862	0.617903	0.445378	0.335901	0.733756	0.401032	0.514847	0.665263	0.395724	0.441512	0.55134	0.508358	0.531777	0.680933	0.45374	0.397355	0.4476	0.435331	0.494761	0.375078	0.571853	0.392638	0.521284	0.623778	0.225559
57.96	0.467668	0.149989	0.249497	0.298894	0.553888	0.483924	0.275017	0.562219	0.493663	0.512955	0.351968	1.00813	0.425777	0.403279	0.49022	0.454688	0.440234	0.613425	0.492518	0.603275	0.71871	0.584486	0.395195	0.378018	0.437067	0.417272	0.333185	0.542487	0.447027	0.312889	0.438762	0.311353
58.1	0.455841	0.129638	0.20628	0.250515	0.639092	0.43945	0.363102	0.446468	0.550043	0.482121	0.321247	0.740234	0.534908	0.333466	0.571968	0.401918	0.424548	0.444799	0.451988	0.534384	0.675647	0.339557	0.401587	0.364027	0.500438	0.551012	0.293235	0.651433	0.439862	0.433564	0.580104	0.308246
58.24	0.462086	0.140907	0.462108	0.40674	0.62043	0.637054	0.316064	0.54722	0.483103	0.350642	0.322668	0.87352	0.585167	0.396336	0.555137	0.288424	0.415272	0.594053	0.431077	0.523734	0.689464	0.35805	0.396826	0.284366	0.377908	0.387797	0.319972	0.618079	0.424973	0.431702	0.512173	0.252513
58.38	0.475381	0.145153	0.123716	0.285488	0.550955	0.482606	0.491749	0.548625	0.630485	0.44346	0.332885	0.820388	0.454564	0.403908	0.591628	0.387485	0.434604	0.550269	0.545234	0.579953	0.737295	0.42934	0.452134	0.478924	0.401679	0.507248	0.47054	0.578878	0.413128	0.296686	0.636674	0.200908
58.52	0.467137	0.148674	0.202194	0.172685	0.667677	0.500874	0.6134	0.562378	0.635465	0.497687	0.410367	0.824729	0.547499	0.336745	0.47105	0.426071	0.405572	0.572239	0.32569	0.50251	0.702823	0.458278	0.41742	0.372976	0.447263	0.465809	0.346281	0.566933	0.409932	0.37137	0.583016	0.197171
58.66	0.465029	0.129599	0.371783	0.388456	0.639178	0.221539	0.530846	0.528416	0.587309	0.432682	0.378708	0.621271	0.430562	0.39634	0.660237	0.394622	0.328606	0.653852	0.578874	0.569293	0.696597	0.457223	0.469002	0.330133	0.450405	0.439198	0.494245	0.557921	0.423709	0.273891	0.462236	0.183741
58.8	0.465957	0.122763	0.152132	0.305715	0.723879	0.374116	0.589622	0.538347	0.586659	0.518607	0.321785	0.592396	0.470189	0.445104	0.609459	0.430345	0.421041	0.574731	0.472661	0.487925	0.593418	0.535086	0.538443	0.436915	0.420173	0.502744	0.374313	0.47477	0.376968	0.329088	0.548632	0.23346
58.94	0.47022	0.135425	0.308589	0.373799	0.735922	0.498736	0.522651	0.501182	0.654663	0.517893	0.384688	0.646288	0.50952	0.43357	0.538619	0.255216	0.384369	0.659929	0.564524	0.511635	0.698884	0.535172	0.463754	0.406076	0.39178	0.299267	0.363968	0.535646	0.432305	0.233066	0.531401	0.213477
59.08	0.445998	0.145682	0.385466	0.151228	0.664246	0.495844	0.417552	0.457217	0.584535	0.402002	0.309344	0.884439	0.367346	0.375743	0.490459	0.41655	0.476874	0.574744	0.513513	0.55327	0.616497	0.459982	0.369148	0.357608	0.357186	0.37808	0.23339	0.531861	0.548579	0.418524	0.414658	0.174052
59.22	0.442186	0.120145	0.175934	0.235294	0.656004	0.372669	0.571955	0.447267	0.667416	0.450257	0.345032	0.577434	0.410206	0.418318	0.550924	0.476128	0.505456	0.526028	0.422913	0.428301	0.625839	0.375033	0.445661	0.392976	0.376322	0.445804	0.340112	0.51928	0.493693	0.279791	0.491311	0.242224
59.36	0.452077	0.149084	0.067596	0.244142	0.610164	0.419839	0.53426	0.475023	0.634335	0.487053	0.284532	0.79455	0.464697	0.326473	0.521853	0.49777	0.463056	0.524273	0.640548	0.362665	0.613049	0.364479	0.459988	0.375576	0.319228	0.384399	0.440939	0.529128	0.47234	0.387253	0.649944	0.213157
59.5	0.474821	0.127717	0.161179	0.353199	0.464298	0.555894	0.621346	0.582079	0.569444	0.448079	0.341688	0.708386	0.484011	0.419723	0.646324	0.373607	0.492024	0.664514	0.438891	0.590455	0.609276	0.492565	0.502046	0.427926	0.422979	0.416523	0.30149	0.595956	0.439879	0.326979	0.533313	0.260541
59.64	0.488552	0.13571	0.316391	0.226148	0.716497	0.422989	0.506312	0.626643	0.592447	0.484875	0.344876	0.726965	0.469232	0.352146	0.565046	0.396188	0.476944	0.574481	0.563989	0.563181	0.812081	0.521985	0.470722	0.446032	0.306756	0.477944	0.399232	0.580328	0.48251	0.434279	0.546748	0.25258
59.78	0.486292	0.121196	0.354954	0.296806	0.494798	0.435396	0.660046	0.424562	0.592309	0.462446	0.357684	0.729837	0.490469	0.453503	0.666761	0.506757	0.44178	0.659622	0.311339	0.617447	0.657403	0.424728	0.408403	0.480394	0.450924	0.398936	0.489881	0.60968	0.463545	0.41804	0.582469	0.247847
59.92	0.457251	0.135318	0.10343	0.358484	0.49222	0.429099	0.587061	0.57837	0.590464	0.419236	0.286229	0.696121	0.419753	0.419943	0.500028	0.426067	0.513439	0.727698	0.527415	0.579112	0.61477	0.415457	0.374434	0.287015	0.435931	0.409494	0.517758	0.512559	0.417256	0.44497	0.462364	0.171354
60.06	0.446849	0.115443	0.240203	0.395891	0.627381	0.317907	0.469588	0.494642	0.59245	0.505618	0.339857	0.641851	0.527468	0.433365	0.516115	0.407814	0.386526	0.551568	0.502392	0.522424	0.602748	0.392599	0.530623	0.333875	0.520513	0.405824	0.357329	0.559824	0.431019	0.255111	0.322404	0.220526
60.2	0.463663	0.121893	0.310191	0.29406	0.709517	0.415422	0.492534	0.403816	0.463802	0.621471	0.333178	0.681944	0.443815	0.423298	0.533546	0.441914	0.475757	0.563962	0.472096	0.394707	0.714039	0.401341	0.525949	0.397225	0.477064	0.533392	0.328267	0.581711	0.442528	0.365128	0.481557	0.186648
60.34	0.44683	0.124314	0.285993	0.160128	0.62915	0.444018	0.424247	0.419898	0.56562	0.445952	0.412763	0.726218	0.404117	0.343413	0.54477	0.323333	0.418028	0.533431	0.499739	0.573961	0.669641	0.386831	0.456016	0.419988	0.415539	0.487231	0.425946	0.544104	0.326125	0.320672	0.550681	0.247337
60.48	0.479828	0.135431	0.287119	0.253276	0.709839	0.480932	0.429826	0.422157	0.590696	0.550092	0.343413	0.765474	0.353956	0.429535	0.565706	0.501384	0.402491	0.700784	0.540395	0.552101	0.718322	0.519305	0.392775	0.392898	0.44741	0.466392	0.449132	0.535308	0.460362	0.372306	0.563695	0.197742
60.62	0.453207	0.139311	0.10527	0.31657	0.435188	0.411966	0.277917	0.526324	0.651637	0.579027	0.336725	0.716821	0.37694	0.349465	0.639755	0.456994	0.444019	0.579509	0.533497	0.577254	0.684579	0.451933	0.510222	0.380431	0.443543	0.583729	0.380828	0.471535	0.431264	0.402532	0.307562	0.233173
60.76	0.454182	0.143132	0.360639	0.268703	0.578441	0.370725	0.464619	0.448447	0.590494	0.496866	0.370432	0.856258	0.406022	0.348205	0.523089	0.354628	0.459161	0.689197	0.424285	0.607281	0.723489	0.549934	0.373501	0.367982	0.362561	0.479474	0.223193	0.506768	0.327434	0.39453	0.470438	0.228659
60.9	0.468642	0.146765	0.217092	0.334922	0.684009	0.562984	0.360418	0.558454	0.571069	0.59265	0.241929	0.871197	0.454888	0.385472	0.581894	0.291183	0.39564	0.520762	0.386591	0.583528	0.760781	0.468432	0.435161	0.407372	0.434738	0.466173	0.484707	0.505928	0.410785	0.320944	0.478235	0.291328
61.04	0.452586	0.141193	0.240313	0.286101	0.323526	0.435101	0.540452	0.417641	0.66237	0.566115	0.381065	0.933387	0.414919	0.323266	0.44618	0.463996	0.399394	0.606605	0.480343	0.574415	0.640145	0.373321	0.414513	0.35265	0.399805	0.471786	0.358041	0.594511	0.417609	0.350806	0.424827	0.284363
61.18	0.485394	0.12895	0.120459	0.33092	0.626327	0.427884	0.663493	0.610865	0.558991	0.48101	0.373266	0.762392	0.484747	0.410552	0.607602	0.453511	0.423618	0.506635	0.537114	0.551849	0.676945	0.461149	0.464289	0.412218	0.49011	0.456011	0.437779	0.590343	0.460015	0.464093	0.493928	0.223706
61.32	0.469778	0.136547	0.187115	0.302678	0.489854	0.530874	0.381847	0.530285	0.560511	0.450331	0.422825	0.86995	0.493796	0.388485	0.55748	0.39744	0.426182	0.558531	0.451452	0.483219	0.681736	0.648207	0.466427	0.322548	0.460878	0.436714	0.333224	0.574495	0.406064	0.334094	0.652324	0.293787
61.46	0.437687	0.128334	0.19041	0.23173	0.59943	0.497675	0.544104	0.414192	0.61172	0.557069	0.388239	0.60673	0.395171	0.296235	0.488667	0.350829	0.423731	0.661557	0.322848	0.528977	0.616223	0.413025	0.490316	0.330801	0.358627	0.383679	0.316876	0.597293	0.436747	0.47729	0.394502	0.205926
61.6	0.493222	0.16219	0.119156	0.468225	0.576181	0.47657	0.545	0.632412	0.539835	0.590918	0.375162	1.04606	0.477048	0.361018	0.503252	0.39673	0.501209	0.597885	0.511539	0.606601	0.665146	0.581985	0.49903	0.34323	0.47386	0.362703	0.370317	0.617754	0.378175	0.511999	0.471788	0.195877
61.74	0.470827	0.134699	0.370915	0.158211	0.551945	0.441607	0.504696	0.600135	0.663759	0.562286	0.328473	0.716711	0.523864	0.429684	0.500156	0.398151	0.390103	0.44365	0.362049	0.511587	0.780366	0.546961	0.557232	0.393832	0.445401	0.484032	0.374907	0.533447	0.459815	0.335501	0.565707	0.189644
61.88	0.47307	0.120701	0.223598	0.366161	0.536588	0.648283	0.417379	0.508162	0.592898	0.552659	0.409255	0.724521	0.419385	0.395474	0.600895	0.458376	0.38094	0.44762	0.580281	0.595147	0.704419	0.530409	0.452145	0.388061	0.480762	0.328891	0.398042	0.51877	0.457092	0.441964	0.411209	0.222701
62.02	0.47488	0.154846	0.137805	0.280883	0.76178	0.48025	0.449362	0.530637	0.639984	0.480573	0.25731	0.766438	0.513684	0.411266	0.515364	0.291788	0.47121	0.462002	0.514524	0.459424	0.794934	0.563803	0.430145	0.364094	0.479315	0.536975	0.300292	0.672736	0.402479	0.407646	0.584109	0.285589
62.16	0.451547	0.132232	0.16462	0.261925	0.446797	0.484114	0.532387	0.309437	0.587	0.40866	0.314745	0.593355	0.420579	0.463274	0.659444	0.463638	0.299588	0.456641	0.29322	0.573319	0.728129	0.500437	0.462995	0.399746	0.473995	0.48362	0.479234	0.587362	0.409857	0.433453	0.638147	0.216697
62.3	0.478476	0.136811	0.335453	0.23293	0.646256	0.351257	0.407563	0.430965	0.599805	0.629859	0.37849	0.847764	0.43453	0.382689	0.542585	0.461003	0.469549	0.542024	0.423696	0.597743	0.73127	0.497895	0.428635	0.410604	0.466013	0.52162	0.350471	0.599395	0.453181	0.466	0.523491	0.19153
62.44	0.469228	0.117831	0.266354	0.252659	0.621086	0.514821	0.425516	0.510691	0.540276	0.669118	0.507108	0.790717	0.456623	0.421085	0.54281	0.428922	0.401312	0.546521	0.392378	0.548344	0.577936	0.475489	0.465216	0.407652	0.472004	0.44328	0.367912	0.556087	0.425841	0.382046	0.441398	0.22563
62.58	0.484976	0.139251	0.219605	0.34519	0.679341	0.438747	0.532575	0.473793	0.621425	0.50368	0.31739	0.764117	0.573409	0.408133	0.58464	0.382403	0.363205	0.519495	0.612817	0.495415	0.651449	0.564416	0.424132	0.40358	0.449836	0.505548	0.397471	0.765456	0.442388	0.440548	0.50345	0.165635
62.72	0.464512	0.138784	0.177438	0.294531	0.685848	0.394705	0.555068	0.249912	0.597915	0.488743	0.325911	0.698808	0.467319	0.380249	0.470961	0.45771	0.426797	0.69781	0.440059	0.533998	0.653013	0.430951	0.436173	0.424696	0.498095	0.455696	0.499559	0.66846	0.405268	0.328825	0.573803	0.217028
62.86	0.458039	0.122367	0.207712	0.339073	0.487698	0.606777	0.5593	0.542456	0.584018	0.528459	0.359586	0.619205	0.475652	0.396201	0.608818	0.458811	0.346064	0.552907	0.452916	0.610256	0.612963	0.399914	0.405358	0.368562	0.483518	0.49594	0.219839	0.620399	0.425736	0.308869	0.404755	0.259411
63	0.457033	0.111839	0.26086	0.354169	0.581324	0.463496	0.61259	0.420643	0.52008	0.451235	0.289322	0.627655	0.409162	0.366305	0.518855	0.409599	0.352063	0.570118	0.558283	0.441481	0.637773	0.487441	0.425535	0.321634	0.40232	0.43631	0.478316	0.690546	0.412992	0.482889	0.484974	0.243025
63.14	0.469127	0.158941	0.063259	0.292823	0.646848	0.490831	0.453876	0.409601	0.658908	0.481646	0.266805	0.856537	0.449712	0.393924	0.517237	0.408566	0.446805	0.666466	0.561962	0.451796	0.813626	0.421665	0.446518	0.387091	0.473597	0.493319	0.437926	0.607554	0.414506	0.324038	0.468356	0.268011
63.28	0.450785	0.120822	0.307158	0.310445	0.376754	0.294887	0.396388	0.460346	0.628787	0.384801	0.349148	0.69091	0.511942	0.412547	0.474074	0.317025	0.459661	0.487234	0.441457	0.597768	0.663794	0.555984	0.357258	0.424063	0.492685	0.446205	0.306001	0.511744	0.404026	0.458438	0.724354	0.277652
63.42	0.449416	0.137489	0.216409	0.277226	0.528369	0.508643	0.421333	0.360006	0.670641	0.492922	0.328845	0.779684	0.461416	0.472357	0.5253	0.46816	0.364661	0.533225	0.456203	0.552321	0.784586	0.512905	0.374583	0.285074	0.367799	0.400692	0.314719	0.535343	0.437477	0.387298	0.443051	0.22122
63.56	0.456663	0.105607	0.287439	0.443348	0.499894	0.430953	0.419725	0.417931	0.640087	0.479009	0.381092	0.629627	0.478342	0.37363	0.628439	0.51523	0.408383	0.57877	0.415525	0.463658	0.663369	0.494753	0.425781	0.309458	0.419761	0.41655	0.486444	0.502797	0.415833	0.325176	0.540121	0.208754
63.7	0.451884	0.129759	0.11034	0.336496	0.515987	0.532329	0.600752	0.476687	0.620423	0.422783	0.351528	0.720243	0.374155	0.406929	0.510593	0.380813	0.447867	0.621187	0.351253	0.496992	0.603844	0.481947	0.428518	0.280653	0.378621	0.462449	0.426525	0.536104	0.453828	0.436952	0.597856	0.191873
63.84	0.463506	0.12644	0.191979	0.325969	0.631198	0.495073	0.451242	0.489144	0.583291	0.512628	0.399454	0.6373	0.591541	0.419651	0.570221	0.303529	0.538078	0.579225	0.472155	0.587649	0.684357	0.310997	0.39908	0.316596	0.36534	0.506682	0.415903	0.548647	0.470892	0.483835	0.443966	0.179565
63.98	0.435206	0.122353	0.292535	0.164703	0.47905	0.37464	0.478954	0.486738	0.576963	0.413984	0.373161	0.681332	0.444668	0.427865	0.56044	0.34289	0.395569	0.537483	0.435559	0.45863	0.754166	0.487053	0.438909	0.314971	0.472958	0.390704	0.470376	0.51986	0.360577	0.428339	0.269447	0.223651
64.12	0.458529	0.122379	0.299839	0.210248	0.424167	0.4213	0.523191	0.610752	0.555073	0.603896	0.394813	0.586305	0.489838	0.394625	0.52701	0.466562	0.459121	0.500425	0.320308	0.617638	0.768762	0.474311	0.395968	0.369269	0.418477	0.433202	0.371536	0.506662	0.462389	0.367334	0.582348	0.200508
64.26	0.449772	0.127524	0.248834	0.338665	0.400464	0.46831	0.621325	0.415577	0.544468	0.414109	0.300361	0.675886	0.512615	0.396808	0.558946	0.361307	0.376975	0.570683	0.497416	0.62418	0.686558	0.518872	0.444006	0.274786	0.365497	0.397667	0.442108	0.655219	0.439382	0.339992	0.407725	0.19441
64.4	0.464346	0.121706	0.358486	0.375895	0.481278	0.498413	0.511668	0.445182	0.599141	0.475224	0.489945	0.858127	0.406635	0.369789	0.467316	0.432687	0.40392	0.549667	0.389747	0.580934	0.756232	0.453545	0.394087	0.35652	0.412548	0.483449	0.485125	0.525185	0.398239	0.273243	0.428373	0.26979
64.54	0.445688	0.136777	0.313109	0.153768	0.664504	0.526804	0.519647	0.345433	0.58982	0.42989	0.32073	0.685536	0.355599	0.475373	0.517689	0.315343	0.476152	0.592718	0.548852	0.624729	0.656216	0.459436	0.468277	0.274056	0.399071	0.49099	0.246202	0.494923	0.40829	0.421989	0.376868	0.218627
64.68	0.452704	0.109394	0.319856	0.371582	0.484761	0.541174	0.38426	0.516427	0.523945	0.4172	0.408897	0.643421	0.394178	0.41733	0.548189	0.475078	0.458886	0.578002	0.392344	0.478418	0.725843	0.579491	0.435528	0.280314	0.288278	0.419807	0.338398	0.57442	0.469762	0.410248	0.469574	0.235498
64.82	0.47225	0.142832	0.359373	0.281803	0.475121	0.550687	0.246436	0.64797	0.578343	0.499796	0.452593	0.869014	0.431777	0.302389	0.660699	0.486821	0.459911	0.569454	0.466737	0.586738	0.693058	0.513108	0.415904	0.423065	0.450104	0.491867	0.248318	0.581919	0.403071	0.334833	0.442832	0.243769
64.96	0.460432	0.145605	0.220072	0.039804	0.431663	0.361619	0.522328	0.507932	0.568451	0.520849	0.486497	0.735742	0.524189	0.359483	0.523549	0.361254	0.36874	0.567634	0.543199	0.618217	0.690095	0.464161	0.514695	0.416532	0.413333	0.528527	0.509101	0.572293	0.351006	0.285098	0.581432	0.225473
65.1	0.484472	0.133417	0.391043	0.357353	0.510551	0.557014	0.777907	0.490321	0.579185	0.423497	0.378111	0.768782	0.483024	0.446676	0.627222	0.347144	0.353773	0.595566	0.436188	0.609271	0.764349	0.536494	0.437584	0.462816	0.469942	0.521398	0.343201	0.465103	0.39872	0.417388	0.379018	0.205517
65.24	0.441073	0.113327	0.304213	0.332456	0.613674	0.400401	0.391744	0.504913	0.545128	0.460072	0.366085	0.659432	0.343665	0.517632	0.441825	0.344371	0.374644	0.506344	0.588026	0.584693	0.566133	0.460068	0.367382	0.377628	0.372719	0.351873	0.371426	0.522133	0.375071	0.43305	0.603424	0.151956
65.38	0.45254	0.131268	0.087319	0.329137	0.458465	0.445968	0.477289	0.43762	0.552024	0.528859	0.367391	0.629208	0.40075	0.365249	0.564483	0.332137	0.444425	0.649417	0.549286	0.643506	0.745897	0.373967	0.400907	0.397412	0.455711	0.391965	0.347904	0.560181	0.50611	0.450243	0.447539	0.23584
65.52	0.443371	0.119353	0.218051	0.324181	0.515107	0.586804	0.41956	0.58298	0.534135	0.428574	0.414629	0.609899	0.430024	0.376629	0.617596	0.339162	0.422599	0.530497	0.411445	0.474719	0.741931	0.467668	0.434067	0.389671	0.390741	0.422965	0.382441	0.601893	0.318323	0.337593	0.359432	0.217819
65.66	0.449055	0.147186	0.229794	0.35026	0.606709	0.47169	0.592314	0.472847	0.565515	0.488959	0.369458	0.852137	0.389016	0.386997	0.54841	0.260674	0.341001	0.559303	0.335575	0.56864	0.700261	0.434326	0.525926	0.282901	0.375811	0.533212	0.238109	0.486314	0.445869	0.378194	0.502714	0.17872
65.8	0.455405	0.14903	0.205854	0.058741	0.52199	0.385994	0.491667	0.572268	0.578397	0.559479	0.366575	0.737276	0.425496	0.376769	0.535749	0.344127	0.440648	0.584548	0.516581	0.61385	0.691459	0.431129	0.396432	0.348162	0.444364	0.516518	0.325684	0.643484	0.465506	0.411021	0.505674	0.166719
65.94	0.458332	0.110655	0.24567	0.34894	0.546219	0.375529	0.458525	0.46146	0.734927	0.562562	0.374474	0.608691	0.459592	0.464918	0.484976	0.37815	0.458591	0.539859	0.425445	0.573983	0.625074	0.496296	0.441684	0.401042	0.350687	0.525781	0.439901	0.524269	0.357191	0.37442	0.507177	0.20391
66.08	0.45514	0.141118	0.271365	0.252256	0.632011	0.481985	0.61251	0.476096	0.617388	0.4996	0.374213	0.861265	0.376925	0.417132	0.454994	0.435634	0.33633	0.456908	0.34107	0.508856	0.656381	0.45369	0.51658	0.268038	0.321459	0.499435	0.356975	0.530089	0.501072	0.299921	0.60209	0.241935
66.22	0.469566	0.150934	0.153334	0.383902	0.544853	0.55193	0.614957	0.477948	0.586052	0.356593	0.343593	0.894964	0.430616	0.412811	0.660812	0.458117	0.398356	0.475801	0.493836	0.454859	0.766812	0.444432	0.560868	0.335506	0.297883	0.451953	0.449048	0.565551	0.458783	0.351481	0.520584	0.19074
66.36	0.485598	0.128475	0.362835	0.252131	0.556384	0.405335	0.606061	0.60181	0.602238	0.533054	0.324988	0.700227	0.556817	0.420582	0.473084	0.387764	0.439934	0.604176	0.622564	0.458751	0.823333	0.420794	0.423681	0.452704	0.396432	0.465749	0.453004	0.645012	0.363346	0.391663	0.543226	0.280266
66.5	0.461604	0.125001	0.279682	0.385087	0.713371	0.400259	0.494286	0.546305	0.610227	0.46491	0.269861	0.511658	0.441309	0.412683	0.538877	0.450521	0.328038	0.516685	0.400941	0.482999	0.725957	0.588974	0.512272	0.371607	0.273937	0.525288	0.286556	0.536044	0.439741	0.393348	0.654816	0.291871
66.64	0.469057	0.147393	0.221347	0.210418	0.56976	0.4435	0.553076	0.599468	0.534071	0.47303	0.400884	0.732688	0.459447	0.495366	0.481878	0.404608	0.423219	0.620867	0.446686	0.600094	0.809441	0.398433	0.472025	0.364179	0.434482	0.529235	0.256484	0.703837	0.472142	0.317884	0.458046	0.185117
66.78	0.471786	0.124768	0.208894	0.409238	0.479198	0.399242	0.644028	0.563454	0.604041	0.301456	0.403773	0.782705	0.443953	0.408668	0.507047	0.548365	0.443351	0.516542	0.445264	0.488476	0.668335	0.53243	0.386149	0.40218	0.39332	0.628854	0.507161	0.584826	0.415107	0.40651	0.404681	0.226325
66.92	0.465399	0.126377	0.323922	0.291043	0.57056	0.562802	0.609232	0.46404	0.551384	0.507105	0.428126	0.837791	0.389493	0.447628	0.44631	0.407453	0.451356	0.480224	0.391019	0.526978	0.781492	0.44204	0.442418	0.391826	0.480706	0.490322	0.376541	0.520587	0.358015	0.312263	0.434421	0.244878
67.06	0.458831	0.158623	0.126336	0.257731	0.432329	0.440304	0.585426	0.764334	0.641768	0.443826	0.295964	0.849394	0.355639	0.460441	0.527684	0.485468	0.424544	0.668618	0.510809	0.531857	0.630843	0.464374	0.496549	0.409197	0.434942	0.438688	0.339331	0.469773	0.390479	0.415417	0.362584	0.110265
67.2	0.454129	0.156458	0.052395	0.222292	0.55108	0.428213	0.473094	0.39457	0.596325	0.519012	0.302452	0.878206	0.419397	0.399947	0.62996	0.445289	0.418013	0.486751	0.374534	0.487138	0.753716	0.434907	0.431866	0.355797	0.517902	0.460801	0.55797	0.636184	0.373984	0.378476	0.402651	0.240948
67.34	0.464895	0.127138	0.260028	0.284785	0.489207	0.508976	0.379657	0.573376	0.628019	0.541692	0.376909	0.77588	0.385121	0.359563	0.451707	0.508104	0.426696	0.613308	0.494005	0.476048	0.707367	0.368568	0.490344	0.42488	0.434747	0.57245	0.355234	0.594805	0.295057	0.406166	0.51274	0.251403
67.48	0.443484	0.134361	0.346008	0.38127	0.531556	0.5687	0.378132	0.355287	0.543145	0.344524	0.367589	0.780035	0.404323	0.398567	0.598284	0.345343	0.487799	0.568614	0.484797	0.41806	0.695305	0.354426	0.461622	0.427222	0.466564	0.514591	0.152518	0.55618	0.432095	0.336302	0.465204	0.140455
67.62	0.444746	0.154374	0.14585	0.302608	0.574074	0.447469	0.425457	0.574915	0.633036	0.413845	0.378396	0.866142	0.426888	0.390126	0.410838	0.32461	0.367313	0.49434	0.31973	0.559334	0.770722	0.377652	0.39894	0.317469	0.420771	0.46094	0.466983	0.679201	0.430664	0.250007	0.487735	0.22634
67.76	0.458261	0.132204	0.139659	0.243583	0.537947	0.479222	0.464954	0.354207	0.567588	0.46709	0.392253	0.800206	0.459369	0.388821	0.443192	0.423058	0.439233	0.561121	0.488422	0.546644	0.744029	0.342334	0.486184	0.38095	0.491701	0.40474	0.514482	0.607469	0.46031	0.353192	0.502693	0.263181
67.9	0.461158	0.125896	0.333288	0.17745	0.630586	0.48025	0.409429	0.601019	0.564589	0.422498	0.355077	0.609667	0.442792	0.456239	0.514081	0.232734	0.45958	0.737665	0.50951	0.566259	0.554046	0.578357	0.342085	0.344312	0.372136	0.488235	0.558285	0.597484	0.402976	0.406175	0.349583	0.338355
68.04	0.470035	0.14616	0.143077	0.262637	0.632587	0.502178	0.319322	0.586745	0.61711	0.483213	0.340085	0.789561	0.466176	0.427402	0.533859	0.378651	0.439455	0.670306	0.483767	0.505381	0.663564	0.477293	0.401382	0.316286	0.446395	0.463379	0.574153	0.653467	0.404457	0.369412	0.554869	0.194875
68.18	0.465804	0.146108	0.115066	0.294487	0.492204	0.386662	0.275277	0.646685	0.644907	0.344478	0.428808	0.752983	0.538346	0.389968	0.487911	0.346702	0.448843	0.596803	0.427691	0.568561	0.790316	0.5263	0.470029	0.451814	0.378981	0.491697	0.501018	0.525813	0.43883	0.420019	0.583913	0.209018
68.32	0.454856	0.133512	0.193008	0.309885	0.589716	0.568086	0.469806	0.418091	0.521933	0.404451	0.362113	0.653715	0.434324	0.422063	0.534404	0.357406	0.355186	0.554355	0.609293	0.491703	0.784591	0.484828	0.485004	0.272345	0.340789	0.449849	0.293041	0.574608	0.364933	0.479569	0.620626	0.245953
68.46	0.455652	0.143808	0.193369	0.387244	0.650698	0.525665	0.317702	0.524012	0.648939	0.489887	0.366381	0.791897	0.357621	0.340308	0.625403	0.306882	0.348958	0.581678	0.445819	0.482701	0.70881	0.437004	0.504486	0.320556	0.364799	0.444725	0.422254	0.647852	0.355614	0.380457	0.467557	0.230268
68.6	0.444434	0.133767	0.226827	0.286496	0.556209	0.46937	0.372997	0.670297	0.68615	0.410167	0.432951	0.653477	0.46759	0.39006	0.596782	0.288348	0.424391	0.548179	0.474405	0.431989	0.691843	0.442334	0.451099	0.330449	0.469444	0.485818	0.31367	0.554885	0.397344	0.310496	0.183884	0.315078
68.74	0.447126	0.137547	0.140324	0.206142	0.608522	0.455797	0.435614	0.446391	0.683439	0.391594	0.394114	0.707807	0.423605	0.394353	0.57394	0.3455	0.384979	0.585164	0.451158	0.508327	0.664067	0.495327	0.448852	0.437971	0.404295	0.490003	0.24187	0.562955	0.47989	0.281618	0.525107	0.245042
68.88	0.465068	0.158817	0.338005	0.235799	0.591202	0.516817	0.277549	0.376073	0.595144	0.396783	0.354373	0.843359	0.452419	0.450761	0.606879	0.301116	0.433778	0.699246	0.271729	0.545527	0.829077	0.476496	0.52209	0.339053	0.43868	0.468081	0.393702	0.701398	0.374711	0.48162	0.401953	0.238615
69.02	0.458971	0.134959	0.118587	0.317337	0.504817	0.538561	0.65762	0.471052	0.599755	0.497138	0.352404	0.700957	0.462592	0.342256	0.549782	0.374094	0.490009	0.577401	0.507056	0.502669	0.743266	0.515507	0.451955	0.360413	0.415725	0.45146	0.495739	0.482879	0.442956	0.328596	0.326505	0.190055
69.16	0.462147	0.131338	0.266003	0.326722	0.6881	0.31097	0.613236	0.458799	0.65146	0.486061	0.30161	0.614723	0.432422	0.417591	0.55286	0.403489	0.370916	0.631047	0.385857	0.514351	0.670543	0.531355	0.452749	0.3613	0.28059	0.580852	0.452704	0.554605	0.437511	0.310352	0.570777	0.23485
69.3	0.477139	0.128145	0.250039	0.365226	0.609213	0.452739	0.535304	0.587317	0.646645	0.366818	0.325411	0.563616	0.415761	0.39962	0.54472	0.376568	0.526452	0.603338	0.470537	0.478313	0.845262	0.505442	0.501709	0.472782	0.445459	0.470319	0.348627	0.64814	0.388969	0.428844	0.524917	0.216079
69.44	0.43858	0.122512	0.350285	0.18349	0.299792	0.438793	0.48572	0.306254	0.570158	0.490964	0.361914	0.773516	0.37934	0.41083	0.546939	0.431641	0.402508	0.578401	0.476648	0.579467	0.53913	0.393007	0.490791	0.261669	0.414922	0.541167	0.340543	0.586402	0.381797	0.433664	0.455556	0.252104
69.58	0.447063	0.143642	0.14151	0.160759	0.532065	0.318243	0.515346	0.494183	0.581292	0.626072	0.390519	0.529971	0.389689	0.488353	0.734999	0.319422	0.417167	0.648463	0.209704	0.504707	0.651589	0.538789	0.482645	0.40176	0.378741	0.487393	0.394524	0.628389	0.367276	0.359166	0.391032	0.328121
69.72	0.458889	0.127444	0.22622	0.297269	0.607771	0.305946	0.464178	0.586279	0.636816	0.397287	0.311466	0.743488	0.383242	0.375975	0.519361	0.419413	0.458668	0.579923	0.450876	0.545738	0.732007	0.533653	0.408916	0.389632	0.428204	0.463077	0.310756	0.572952	0.422447	0.384887	0.490902	0.319336
69.86	0.461814	0.14003	0.280626	0.287162	0.701895	0.42878	0.552665	0.563798	0.584967	0.346014	0.350243	0.724107	0.383542	0.474106	0.667444	0.304747	0.411356	0.581197	0.534376	0.463402	0.69343	0.468354	0.405044	0.332364	0.401746	0.512189	0.312137	0.630289	0.291496	0.39783	0.538133	0.230987
70	0.458173	0.1029	0.360107	0.357055	0.429915	0.437674	0.341152	0.5204	0.613186	0.419083	0.394064	0.645485	0.425355	0.453125	0.466631	0.361543	0.524635	0.55386	0.417702	0.583372	0.656883	0.545948	0.539519	0.403138	0.346936	0.415535	0.461209	0.572157	0.383542	0.295155	0.554552	0.26628
