# Supplementary material for: MCPH1 inhibits Condensin II during interphase by regulating its SMC2-Kleisin interface
Source: eLife. 2021 Dec 1;10:e73348. doi: 10.7554/eLife.73348 (PMC8673838; doi:10.7554/eLife.73348)
Supplement: Figure 5—source data 1. [file elife-73348-fig5-data1.xlsx]

## Sheet: Sheet1
Condensin II pentamer
Raw Data
	Repeat 1				Repeat 2				Repeat 3
0	53.5	40.9	56.2		58.9	52.2	66.2		70	85.6	69.2
0.625	127.2	146.6	127.8		126	126.6	132.2		141.8	143.1	138.4
1.25	165.2	151.6	150.3		180.2	162.4	150.1		182.8	176.8	167.9
1.75	162.1	175.5	174.5		179.9	182.1	186.5		189.3	184.6	188.8
2.5	187.2	196.1	185.2		183.6	203.8	204.5		204.9	201.7	202.2
3.5	201.2	201.2	202.2		213.8	206.1	209.3		216.2	232.8	204
5	193.9	209.6	184.7		208.5	199.8	192.6		215	218	215.7
Background corrected
	Repeat 1				Repeat 2				Repeat 3				Mean 1	Mean 2	Mean 3		Mean All	SD
0	0	0	0		0	0	0		0	0	0		0	0	0	0	0	0
0.625	73.7	105.7	71.6		67.1	74.4	66		71.8	57.5	69.2		83.6667	69.1667	66.1667	0.625	73	11.264
1.25	111.7	110.7	94.1		121.3	110.2	83.9		112.8	91.2	98.7		105.5	105.133	100.9	1.25	103.844	12.9497
1.75	108.6	134.6	118.3		121	129.9	120.3		119.3	99	119.6		120.5	123.733	112.633	1.75	118.956	9.8662
2.5	133.7	155.2	129		124.7	151.6	138.3		134.9	116.1	133		139.3	138.2	128	2.5	135.167	11.7492
3.5	147.7	160.3	146		154.9	153.9	143.1		146.2	147.2	134.8		151.333	150.633	142.733	3.5	148.233	6.57463
5	140.4	168.7	128.5		149.6	147.6	126.4		145	132.4	146.5		145.867	141.2	141.3	5	142.789	13.6452
Condensin II delCapG2
Raw Data
	Repeat 1				Repeat 2				Repeat 3
0	53.5	40.9	56.2		58.9	52.2	66.2		70	85.6	69.2
0.625	87.2	66.8	66.5		86.9	82.7	80.3		99.2	92.6	86.6
1.25	61.5	60.6	70.2		56.7	77	88.8		93.8	77.8	91.2
1.75	69.7	77.1	82.3		85	75.5	66.6		97.3	91.7	79.1
3.5	86.4	73.4	87.1		87.5	88.4	84.6		86.8	97.9	85.4
Background corrected
	Repeat 1				Repeat 2				Repeat 3				Mean 1	Mean 2	Mean 3		Mean All	SD
0	0	0	0		0	0	0		0	0	0		0	0	0	0	0	0
0.625	33.7	25.9	10.3		28	30.5	14.1		29.2	7	17.4		23.3	24.2	17.8667	0.625	21.7889	9.90531
1.25	8	19.7	14		-2.2	24.8	22.6		23.8	-7.8	22		13.9	15.0667	12.6667	1.25	13.8778	12.8064
1.75	16.2	36.2	26.1		26.1	23.3	0.4		27.3	6.1	9.9		26.1667	16.6	14.4333	1.75	19.0667	11.0398
3.5	32.9	32.5	30.9		28.6	36.2	18.4		16.8	12.3	16.2		32.1	27.7333	15.1	3.5	24.9778	4.98178
