# Supplementary material for: MCPH1 inhibits Condensin II during interphase by regulating its SMC2-Kleisin interface
Source: eLife. 2021 Dec 1;10:e73348. doi: 10.7554/eLife.73348 (PMC8673838; doi:10.7554/eLife.73348)
Supplement: Figure 5—source data 2. [file elife-73348-fig5-data2.xlsx]

## Sheet: Sheet1
Raw data
peptide concentration	0	1	2	4	8	16	32	64			0	1	2	4	8	16	32	64
mcph1	51.6	77.8	83.6	90	89	83.5				CII+mcph1	176.6	170.1	146.4	121.7	118.5	91.2
mcph1	45	67.4	90.1	93.4	94.3	89				CII+mcph1	196	160.9	144.3	130.9	118.7	110.6
mcph1	66.4	89	76	70.2	89.1	91.3				CII+mcph1	179.7	164.2	130.6	137.2	113.5	98.8
mcph1	38.4	72	69.6	74.6	85	85.3				CII+mcph1	183.9	169.2	127.9	122.4	124.3	108.7
MCPH1	101.9	99.5	126	132.5	126.7	136.5				CII+MCPH1	222.5	199	183.2	185.3	163.6	150
MCPH1	95.9	111.1	123.6	135.3	141.9	141.2				CII+MCPH1	210	189	178.2	176.3	168.8	140.1
MCPH1	101	110.6	127.4	136.2	148.4	146.7				CII+MCPH1	204.8	194.4	195.3	176.4	154.3	145.3
MCPH1	96.6	127.3	125.8	126.6	132.1	145.1				CII+MCPH1	201.5	188.3	184.2	174.6	152.3	144.2
MCPH1	114.9	118.6	114	131.3	131.1	131.7				CII+MCPH1	202.6	189.8	184.3	165.6	142	142.2
MCPH1	98.5	130.3	128.4	137.8	134.2	141.1				CII+MCPH1	203.5	182.4	189.9	167.2	146.9	141.4
MCPH1	105.8	118.2	131.4	128	131.6	133.6				CII+MCPH1	213.7	183.3	171.1	191.4	154.2	133.2
MCPH1	109	124.3	131.4	126.3	137.1	139				CII+MCPH1	207.4	182.1	175	177.5	144	128.8
mcph1P	67.8	67.5	79.1	88.5	67.7	77.3				CII+mcph1P	169.5	182	181.6	171.7	157.5	144.3
mcph1P	55.8	72.2	81.5	78.9	99.1	89.2				CII+mcph1P	183.8	175.8	172.9	181.3	152.7	137
mcph1P	51.2	81	73.2	80.9	77.3	86.3				CII+mcph1P	169	175.2	165.4	172	137.5	133.6
mcph1P	48	58.8	76.2	80.9	73.9	84.3				CII+mcph1P	173	175	172.2	173.3	147.4	135
MCPH1P	111.7			127.9	133.6	122.5	135	129		CII+MCPH1P	212.4			190.7	185.7	162	158.6	148.9
MCPH1P	109.4			126.6	125.1	116.3	131.9	128.8		CII+MCPH1P	207.6			187.6	197.7	173.5	154.1	146
MCPH1P	103			117.7	114.5	122	135.9	133.4		CII+MCPH1P	206.1			192.2	187	175.5	153.3	143.6
MCPH1P	100.6			113	129.6	109	124.6	133		CII+MCPH1P	192.9			206.4	178.4	176.6	160.2	151.6			peptide concentration	0	1	2	4	8	16	32	64
MCPH1P	110.9			111	109.4	121.5	120.3	113.7		MCPH1P	200.4			179.6	187	172.5	161.6	141.9			Mean 1	1	0.672343	0.435984	0.355454	0.220762	0.107917
MCPH1P	128.5			126.4	122.4	125.5	135.5	132		MCPH1P	211.1			185.6	189.8	176.2	153.6	139.5			Mean 2	1	0.724151	0.540922	0.410502	0.197783	0.0200581
MCPH1P	106			117.1	115.2	122.5	132.1	130.8		MCPH1P	194.2			187.7	180.7	171.3	144.2	133.6			Mean 3	1	0.624696	0.549583	0.444753	0.131204	0.00380445
MCPH1P	103.3			117.6	122	113.1	121.1	127.6		MCPH1P	196.3			181.5	170.5	172.1	146.1	135.8
MCPH1P	120						135.6	121.1		MCPH1P	206.5						157	145.7			Mean 1	1			0.782659	0.600194	0.459841	0.343276	0.333324
MCPH1P	115.9						119.4	119.7		MCPH1P	202.3						145.6	157.9			Mean 2	1			0.744833	0.622149	0.556512	0.253724	0.168305
MCPH1P	118.5						124.8	123.9		MCPH1P	215.4						152.3	148.2			Mean 3	1			0.742684	0.736789	0.592833	0.271647	0.13145
MCPH1P	126.2						114.3	116.3		MCPH1P	201.2						154.7	143
Background corrected										Normalised
peptide concentration	0	1	2	4	8	16	32	64		peptide concentration	0	1	2	4	8	16	32	64			peptide concentration	0	1	2	4	8	16	32	64
mcph1	125	92.3	62.8	31.7	29.5	7.7			Repeat 1	CII+mcph1	1	0.7384	0.5024	0.2536	0.236	0.0616					SD	0	0.0999149	0.120107	0.11852	0.0701733	0.0665075
mcph1	151	93.5	54.2	37.5	24.4	21.6				CII+mcph1	1	0.619205	0.35894	0.248344	0.161589	0.143046					SD	0			0.106305	0.15186	0.10847	0.116257	0.0869315
mcph1	113.3	75.2	54.6	67	24.4	7.5				CII+mcph1	1	0.663725	0.481906	0.59135	0.215357	0.0661959
mcph1	145.5	97.2	58.3	47.8	39.3	23.4				CII+mcph1	1	0.668041	0.400687	0.328522	0.270103	0.160825
MCPH1	120.6	99.5	57.2	52.8	36.9	13.5			Repeat 2	CII+MCPH1	1	0.825041	0.474295	0.437811	0.30597	0.11194
MCPH1	114.1	77.9	54.6	41	26.9	-1.1				CII+MCPH1	1	0.682734	0.478528	0.359334	0.235758	-0.00964067					Peptide concentration	MCPH1 mean	MCPH1 SD			MCPH1P mean	MCPH1P SD
MCPH1	103.8	83.8	67.9	40.2	5.9	-1.4				CII+MCPH1	1	0.807322	0.654143	0.387283	0.0568401	-0.0134875					0	1	0		0	1	0
MCPH1	104.9	61	58.4	48	20.2	-0.9				CII+MCPH1	1	0.581506	0.556721	0.457579	0.192564	-0.0085796					1	0.67373	0.0999149		4	0.756726	0.106305
MCPH1	87.7	71.2	70.3	34.3	10.9	10.5			Repeat 3	CII+MCPH1	1	0.811859	0.801596	0.391106	0.124287	0.119726					2	0.508829	0.120107		8	0.653044	0.15186
MCPH1	105	52.1	61.5	29.4	12.7	0.3				CII+MCPH1	1	0.49619	0.585714	0.28	0.120952	0.00285714					4	0.40357	0.11852		16	0.536395	0.10847
MCPH1	107.9	65.1	39.7	63.4	22.6	-0.4				CII+MCPH1	1	0.603336	0.367933	0.587581	0.209453	-0.00370714					8	0.18325	0.0701733		32	0.289549	0.116257
MCPH1	98.4	57.8	43.6	51.2	6.9	-10.2				CII+MCPH1	1	0.587398	0.443089	0.520325	0.070122	-0.103659					16	0.0439265	0.0665075		64	0.211026	0.0869315
mcph1P	101.7	114.5	102.5	83.2	89.8	67			Repeat 1	CII+mcph1P	1			0.818092	0.882989	0.6588	0.247399	0.284393
mcph1P	128	103.6	91.4	102.4	53.6	47.8				CII+mcph1P	1			0.8	0.41875	0.373437	0.303241	0.44213
mcph1P	117.8	94.2	92.2	91.1	60.2	47.3				CII+mcph1P	1			0.773345	0.511036	0.401528	0.283798	0.250774
mcph1P	125	116.2	96	92.4	73.5	50.7				CII+mcph1P	1			0.7392	0.588	0.4056	0.538667	0.356
MCPH1P	100.7			62.8	52.1	39.5	23.6	19.9	Repeat 2	CII+MCPH1P	1			0.623635	0.517378	0.392254	0.234359	0.197617
MCPH1P	98.2			61	72.6	57.2	22.2	17.2		CII+MCPH1P	1			0.621181	0.739308	0.582485	0.226069	0.175153
MCPH1P	103.1			74.5	72.5	53.5	17.4	10.2		CII+MCPH1P	1			0.722599	0.703201	0.518914	0.168768	0.0989331
MCPH1P	92.3			93.4	48.8	67.6	35.6	18.6		CII+MCPH1P	1			1.01192	0.528711	0.732394	0.385699	0.201517
MCPH1P	89.5			68.6	77.6	51	41.3	28.2	Repeat 3	CII+mcph1P	1			0.76648	0.867039	0.569832	0.461453	0.315084
MCPH1P	82.6			59.2	67.4	50.7	18.1	7.5		CII+mcph1P	1			0.716707	0.815981	0.613801	0.219128	0.090799
MCPH1P	88.2			70.6	65.5	48.8	12.1	2.8		CII+mcph1P	1			0.800454	0.74263	0.553288	0.137188	0.031746
MCPH1P	93			63.9	48.5	59	25	8.2		CII+mcph1P	1			0.687097	0.521505	0.634409	0.268817	0.088172
MCPH1P	86.5						21.4	24.6
MCPH1P	86.4						26.2	38.2
MCPH1P	96.9						27.5	24.3
MCPH1P	75						40.4	26.7
