# Supplementary material for: MCPH1 inhibits Condensin II during interphase by regulating its SMC2-Kleisin interface
Source: eLife. 2021 Dec 1;10:e73348. doi: 10.7554/eLife.73348 (PMC8673838; doi:10.7554/eLife.73348)
Supplement: Figure 7—source data 1. [file elife-73348-fig7-data1.xlsx]

## Sheet: All Cycles
Phosphate Concentration (uM)	Mean	Raw Data (360)	Raw Data (360)	Raw Data (360)	Raw Data (360)	Raw Data (360)	Raw Data (360)	Raw Data (360)	Raw Data (360)	Raw Data (360)	Raw Data (360)	Raw Data (360)	Raw Data (360)	Raw Data (360)	Raw Data (360)	Raw Data (360)	Raw Data (360)	Raw Data (360)	Raw Data (360)	Raw Data (360)	Raw Data (360)	Raw Data (360)	Raw Data (360)	Raw Data (360)	Raw Data (360)	Raw Data (360)	Raw Data (360)	Raw Data (360)	Raw Data (360)	Raw Data (360)	Raw Data (360)	Raw Data (360)	Raw Data (360)	Raw Data (360)	Raw Data (360)	Raw Data (360)	Raw Data (360)	Raw Data (360)	Raw Data (360)	Raw Data (360)	Raw Data (360)	Raw Data (360)	Raw Data (360)	Raw Data (360)	Raw Data (360)	Raw Data (360)	Raw Data (360)	Raw Data (360)	Raw Data (360)
Time		0 min	0 min 20 s	0 min 40 s	1 min	1 min 20 s	1 min 40 s	2 min	2 min 20 s	2 min 40 s	3 min	3 min 20 s	3 min 40 s	4 min	4 min 20 s	4 min 40 s	5 min	5 min 20 s	5 min 40 s	6 min	6 min 20 s	6 min 40 s	7 min	7 min 20 s	7 min 40 s	8 min	8 min 20 s	8 min 40 s	9 min	9 min 20 s	9 min 40 s	10 min	10 min 20 s	10 min 40 s	11 min	11 min 20 s	11 min 40 s	12 min	12 min 20 s	12 min 40 s	13 min	13 min 20 s	13 min 40 s	14 min	14 min 20 s	14 min 40 s	15 min	15 min 20 s	15 min 40 s
0	0.34368	0.344	0.345	0.345	0.345	0.343	0.343	0.343	0.343	0.344	0.342	0.343	0.343	0.344	0.345	0.344	0.342	0.344	0.344	0.342	0.344	0.344	0.344	0.343	0.343	0.343	0.345	0.342	0.343	0.343	0.344	0.345	0.344	0.344	0.343	0.343	0.344	0.344	0.345	0.344	0.343	0.344	0.343	0.344	0.342	0.345	0.344	0.344	0.345
15.625	0.39726	0.399	0.401	0.401	0.4	0.4	0.399	0.399	0.397	0.398	0.397	0.398	0.398	0.397	0.399	0.398	0.398	0.397	0.398	0.397	0.397	0.398	0.396	0.397	0.397	0.396	0.398	0.397	0.397	0.396	0.397	0.397	0.398	0.398	0.396	0.394	0.397	0.397	0.397	0.396	0.397	0.397	0.396	0.396	0.396	0.395	0.396	0.394	0.396
31.25	0.45458	0.458	0.457	0.457	0.457	0.456	0.456	0.455	0.455	0.455	0.454	0.455	0.455	0.455	0.457	0.456	0.454	0.456	0.456	0.454	0.455	0.454	0.454	0.453	0.454	0.454	0.455	0.455	0.454	0.454	0.454	0.455	0.454	0.454	0.454	0.452	0.454	0.455	0.454	0.454	0.453	0.454	0.453	0.455	0.451	0.455	0.453	0.454	0.453
62.5	0.58736	0.589	0.59	0.591	0.59	0.589	0.588	0.587	0.589	0.588	0.587	0.586	0.588	0.588	0.589	0.589	0.588	0.587	0.588	0.588	0.587	0.587	0.589	0.586	0.586	0.586	0.587	0.588	0.587	0.587	0.589	0.588	0.587	0.587	0.587	0.587	0.586	0.586	0.588	0.586	0.587	0.588	0.586	0.586	0.585	0.586	0.584	0.587	0.587
125	0.8048	0.805	0.804	0.805	0.808	0.803	0.805	0.805	0.804	0.806	0.803	0.803	0.806	0.805	0.809	0.806	0.804	0.803	0.805	0.804	0.806	0.806	0.806	0.804	0.804	0.803	0.806	0.806	0.804	0.804	0.805	0.804	0.804	0.804	0.805	0.804	0.805	0.805	0.806	0.805	0.805	0.807	0.802	0.806	0.801	0.806	0.803	0.803	0.806
250	0.94214	0.944	0.944	0.943	0.941	0.941	0.943	0.944	0.941	0.941	0.942	0.939	0.943	0.941	0.945	0.941	0.944	0.942	0.942	0.944	0.941	0.944	0.945	0.939	0.941	0.942	0.943	0.944	0.939	0.941	0.941	0.94	0.942	0.943	0.942	0.94	0.943	0.943	0.941	0.944	0.943	0.943	0.941	0.941	0.94	0.945	0.942	0.941	0.944
0	0.3472	0.348	0.348	0.348	0.35	0.347	0.347	0.347	0.348	0.347	0.348	0.347	0.347	0.346	0.347	0.347	0.348	0.346	0.349	0.347	0.347	0.348	0.347	0.346	0.345	0.346	0.347	0.347	0.345	0.347	0.349	0.348	0.348	0.348	0.347	0.346	0.347	0.347	0.347	0.348	0.347	0.346	0.347	0.349	0.346	0.346	0.348	0.347	0.348
15.625	0.40568	0.407	0.408	0.408	0.409	0.407	0.406	0.407	0.407	0.406	0.405	0.405	0.407	0.407	0.407	0.407	0.406	0.406	0.409	0.406	0.405	0.405	0.406	0.404	0.405	0.404	0.406	0.405	0.405	0.406	0.405	0.405	0.406	0.406	0.406	0.404	0.405	0.405	0.406	0.405	0.406	0.405	0.404	0.406	0.403	0.403	0.403	0.406	0.405
31.25	0.5214	0.523	0.524	0.526	0.525	0.523	0.522	0.522	0.523	0.523	0.521	0.519	0.523	0.522	0.524	0.523	0.522	0.522	0.523	0.521	0.521	0.521	0.522	0.521	0.521	0.522	0.522	0.521	0.52	0.521	0.521	0.521	0.522	0.52	0.52	0.519	0.521	0.52	0.521	0.522	0.521	0.52	0.52	0.522	0.518	0.52	0.519	0.521	0.52
62.5	0.67052	0.673	0.672	0.672	0.672	0.672	0.67	0.671	0.672	0.671	0.671	0.671	0.67	0.672	0.671	0.671	0.67	0.672	0.671	0.671	0.671	0.671	0.673	0.67	0.668	0.67	0.671	0.67	0.669	0.67	0.671	0.669	0.672	0.672	0.671	0.669	0.67	0.67	0.67	0.669	0.67	0.67	0.668	0.67	0.668	0.669	0.669	0.67	0.67
125	0.85798	0.861	0.856	0.859	0.86	0.858	0.859	0.856	0.856	0.859	0.859	0.858	0.859	0.857	0.858	0.858	0.859	0.856	0.858	0.859	0.858	0.859	0.861	0.858	0.856	0.857	0.859	0.857	0.856	0.855	0.857	0.86	0.859	0.862	0.859	0.856	0.857	0.858	0.858	0.859	0.856	0.861	0.856	0.859	0.857	0.856	0.858	0.856	0.859
250	0.95698	0.959	0.959	0.957	0.962	0.958	0.959	0.957	0.958	0.957	0.96	0.956	0.956	0.957	0.958	0.959	0.959	0.955	0.96	0.956	0.956	0.959	0.958	0.953	0.954	0.955	0.959	0.958	0.956	0.957	0.955	0.954	0.959	0.957	0.958	0.952	0.957	0.956	0.956	0.957	0.957	0.955	0.955	0.956	0.954	0.958	0.954	0.959	0.958
0	0.33974	0.341	0.341	0.34	0.341	0.34	0.34	0.34	0.339	0.341	0.34	0.338	0.339	0.338	0.341	0.339	0.342	0.34	0.342	0.338	0.339	0.339	0.34	0.339	0.339	0.34	0.341	0.339	0.339	0.339	0.34	0.34	0.34	0.341	0.339	0.338	0.34	0.34	0.341	0.34	0.34	0.341	0.338	0.34	0.338	0.339	0.339	0.339	0.34
15.625	0.49186	0.495	0.495	0.493	0.495	0.494	0.492	0.493	0.493	0.494	0.494	0.49	0.493	0.49	0.493	0.492	0.493	0.492	0.494	0.491	0.491	0.493	0.492	0.491	0.492	0.49	0.492	0.491	0.492	0.492	0.492	0.492	0.491	0.492	0.492	0.49	0.493	0.491	0.492	0.492	0.49	0.492	0.489	0.491	0.486	0.491	0.491	0.491	0.492
31.25	0.59514	0.595	0.598	0.597	0.597	0.595	0.595	0.597	0.596	0.596	0.596	0.595	0.596	0.594	0.597	0.596	0.597	0.594	0.597	0.594	0.596	0.597	0.597	0.594	0.594	0.594	0.595	0.594	0.595	0.595	0.594	0.594	0.595	0.595	0.594	0.593	0.594	0.594	0.596	0.595	0.596	0.594	0.594	0.595	0.593	0.594	0.595	0.595	0.595
62.5	0.641	0.642	0.643	0.643	0.643	0.643	0.64	0.642	0.642	0.641	0.642	0.641	0.641	0.641	0.642	0.642	0.642	0.642	0.641	0.641	0.64	0.642	0.642	0.64	0.64	0.64	0.642	0.64	0.641	0.64	0.641	0.641	0.641	0.642	0.642	0.64	0.641	0.639	0.642	0.64	0.641	0.641	0.638	0.64	0.638	0.641	0.638	0.641	0.641
125	0.8753	0.875	0.873	0.874	0.875	0.874	0.873	0.874	0.875	0.874	0.876	0.874	0.875	0.874	0.875	0.877	0.876	0.876	0.876	0.875	0.873	0.876	0.877	0.874	0.875	0.877	0.876	0.873	0.874	0.876	0.875	0.875	0.877	0.877	0.876	0.875	0.877	0.875	0.878	0.878	0.875	0.877	0.873	0.874	0.876	0.878	0.873	0.874	0.878
250	0.94474	0.948	0.944	0.945	0.947	0.946	0.942	0.946	0.946	0.942	0.944	0.942	0.944	0.946	0.946	0.947	0.948	0.945	0.944	0.943	0.944	0.947	0.946	0.943	0.943	0.946	0.942	0.943	0.944	0.945	0.944	0.945	0.946	0.945	0.945	0.941	0.944	0.944	0.946	0.945	0.947	0.946	0.943	0.945	0.944	0.944	0.945	0.944	0.946
Phosphate concentration (uM)	Mean (rep1)	Mean (rep2)	Mean (rep3)
0	0.34368	0.3472	0.33974
15.625	0.39726	0.40568	0.49186
31.25	0.45458	0.5214	0.59514
62.5	0.58736	0.67052	0.641
125	0.8048	0.85798	0.8753
250	0.94214	0.95698	0.94474
Values fit in Graph pad prism
	Slope	0.003913
	Y-intercept	0.3721
	X-intercept	-95.11
	1/slope	255.6
	R squared	0.9409
[truncated: 2 more columns]
