# Supplementary material for: MCPH1 inhibits Condensin II during interphase by regulating its SMC2-Kleisin interface
Source: eLife. 2021 Dec 1;10:e73348. doi: 10.7554/eLife.73348 (PMC8673838; doi:10.7554/eLife.73348)
Supplement: Figure 7—source data 2. [file elife-73348-fig7-data2.xlsx]

## Sheet: Raw_ATPase_data
Full data, absorbance at 360nm per 0.05uM of protein
Time	CII	CII	CII	CII+DNA	CII+DNA	CII+DNA	CII+M	CII+M	CII+M	CII+M+DNA	CII+M+DNA	CII+M+DNA	CIIQ+M	CIIQ+M	CIIQ+M	CIIQ+M+DNA	CIIQ+M+DNA	CIIQ+M+DNA	Buffer	Buffer	Buffer
0	0.368	0.365	0.366	0.373	0.369	0.363	0.365	0.36	0.356	0.371	0.361	0.365	0.364	0.348	0.353	0.362	0.354	0.355	0.357	0.351	0.352
0.5	0.372	0.366	0.368	0.377	0.371	0.367	0.367	0.362	0.359	0.375	0.364	0.369	0.364	0.351	0.355	0.364	0.354	0.356	0.357	0.35	0.351
1	0.372	0.367	0.37	0.378	0.375	0.369	0.368	0.364	0.361	0.376	0.366	0.368	0.365	0.352	0.354	0.362	0.354	0.356	0.357	0.351	0.352
1.5	0.373	0.369	0.37	0.38	0.377	0.372	0.369	0.366	0.361	0.377	0.368	0.37	0.364	0.351	0.354	0.361	0.355	0.355	0.357	0.36	0.352
2	0.374	0.369	0.37	0.383	0.377	0.373	0.371	0.364	0.36	0.378	0.369	0.372	0.364	0.349	0.353	0.362	0.355	0.355	0.357	0.373	0.352
2.5	0.376	0.371	0.373	0.383	0.381	0.375	0.371	0.366	0.362	0.381	0.372	0.374	0.364	0.351	0.353	0.364	0.356	0.356	0.358	0.352	0.352
3	0.376	0.371	0.373	0.387	0.384	0.378	0.373	0.367	0.364	0.382	0.373	0.374	0.365	0.351	0.353	0.362	0.354	0.356	0.356	0.351	0.352
3.5	0.378	0.373	0.373	0.389	0.387	0.38	0.372	0.369	0.364	0.384	0.375	0.378	0.365	0.351	0.355	0.363	0.354	0.357	0.357	0.351	0.352
4	0.378	0.373	0.375	0.392	0.389	0.383	0.374	0.369	0.365	0.386	0.376	0.379	0.365	0.35	0.355	0.364	0.355	0.356	0.357	0.352	0.353
4.5	0.38	0.374	0.377	0.393	0.391	0.385	0.375	0.369	0.366	0.388	0.378	0.38	0.365	0.35	0.355	0.364	0.355	0.357	0.357	0.352	0.352
5	0.38	0.375	0.376	0.396	0.392	0.387	0.376	0.37	0.367	0.39	0.381	0.382	0.367	0.351	0.354	0.362	0.354	0.356	0.357	0.351	0.353
5.5	0.379	0.373	0.376	0.396	0.395	0.388	0.375	0.369	0.365	0.391	0.379	0.382	0.364	0.35	0.352	0.362	0.354	0.357	0.357	0.351	0.351
6	0.381	0.377	0.379	0.398	0.397	0.392	0.376	0.37	0.369	0.392	0.382	0.384	0.365	0.351	0.353	0.362	0.354	0.357	0.358	0.353	0.351
6.5	0.383	0.378	0.38	0.403	0.4	0.394	0.379	0.373	0.369	0.395	0.384	0.387	0.365	0.352	0.356	0.364	0.355	0.357	0.358	0.352	0.353
7	0.384	0.379	0.381	0.404	0.404	0.397	0.379	0.375	0.371	0.397	0.386	0.389	0.366	0.352	0.356	0.364	0.356	0.359	0.357	0.352	0.353
7.5	0.383	0.378	0.38	0.405	0.403	0.398	0.38	0.375	0.37	0.396	0.388	0.389	0.366	0.351	0.354	0.364	0.354	0.357	0.357	0.352	0.352
8	0.385	0.379	0.383	0.409	0.406	0.401	0.381	0.376	0.372	0.399	0.389	0.391	0.365	0.353	0.355	0.363	0.356	0.358	0.358	0.352	0.353
8.5	0.386	0.381	0.384	0.411	0.409	0.404	0.382	0.376	0.373	0.402	0.391	0.394	0.366	0.352	0.357	0.364	0.356	0.358	0.358	0.352	0.353
9	0.388	0.381	0.383	0.412	0.41	0.404	0.382	0.377	0.373	0.402	0.392	0.395	0.367	0.353	0.354	0.364	0.356	0.358	0.356	0.353	0.352
9.5	0.387	0.382	0.383	0.414	0.412	0.408	0.383	0.379	0.374	0.404	0.393	0.397	0.365	0.352	0.356	0.364	0.356	0.358	0.357	0.351	0.353
10	0.389	0.384	0.386	0.417	0.415	0.41	0.386	0.38	0.374	0.407	0.394	0.399	0.366	0.352	0.356	0.364	0.357	0.358	0.357	0.353	0.353
10.5	0.39	0.383	0.384	0.417	0.417	0.412	0.385	0.379	0.375	0.406	0.396	0.399	0.367	0.351	0.355	0.363	0.356	0.358	0.357	0.352	0.352
11	0.39	0.385	0.387	0.42	0.42	0.415	0.385	0.38	0.375	0.409	0.398	0.4	0.367	0.352	0.357	0.365	0.355	0.359	0.357	0.353	0.353
11.5	0.392	0.385	0.387	0.424	0.42	0.417	0.386	0.382	0.376	0.412	0.4	0.403	0.366	0.353	0.356	0.363	0.357	0.358	0.358	0.353	0.352
12	0.392	0.386	0.389	0.426	0.424	0.419	0.388	0.383	0.379	0.413	0.402	0.405	0.367	0.353	0.357	0.366	0.357	0.36	0.359	0.354	0.354
12.5	0.394	0.388	0.391	0.43	0.426	0.421	0.388	0.384	0.379	0.413	0.404	0.407	0.368	0.353	0.356	0.365	0.357	0.36	0.359	0.354	0.354
13	0.393	0.388	0.39	0.43	0.427	0.423	0.389	0.383	0.379	0.416	0.405	0.408	0.367	0.352	0.356	0.364	0.356	0.359	0.357	0.351	0.353
13.5	0.395	0.388	0.392	0.433	0.431	0.425	0.39	0.385	0.381	0.419	0.407	0.409	0.367	0.354	0.357	0.366	0.358	0.359	0.358	0.354	0.353
14	0.395	0.39	0.392	0.434	0.431	0.427	0.39	0.385	0.381	0.419	0.408	0.411	0.366	0.353	0.357	0.366	0.358	0.36	0.357	0.358	0.353
14.5	0.397	0.389	0.394	0.438	0.435	0.43	0.393	0.387	0.384	0.421	0.41	0.413	0.367	0.354	0.356	0.365	0.359	0.36	0.359	0.368	0.353
15	0.397	0.392	0.394	0.438	0.438	0.432	0.393	0.387	0.383	0.424	0.412	0.415	0.367	0.354	0.358	0.366	0.358	0.358	0.359	0.375	0.352
15.5	0.399	0.393	0.395	0.441	0.44	0.435	0.394	0.388	0.385	0.425	0.414	0.416	0.369	0.354	0.357	0.366	0.359	0.361	0.359	0.371	0.353
16	0.399	0.392	0.395	0.443	0.442	0.435	0.394	0.388	0.384	0.427	0.414	0.416	0.367	0.354	0.357	0.365	0.358	0.359	0.358	0.363	0.353
16.5	0.4	0.393	0.396	0.444	0.443	0.438	0.396	0.39	0.386	0.426	0.416	0.419	0.367	0.353	0.358	0.366	0.358	0.36	0.358	0.354	0.354
17	0.399	0.394	0.397	0.447	0.445	0.44	0.395	0.39	0.387	0.431	0.417	0.42	0.367	0.354	0.357	0.365	0.357	0.359	0.356	0.353	0.352
17.5	0.401	0.394	0.398	0.449	0.447	0.442	0.396	0.391	0.389	0.429	0.419	0.421	0.366	0.353	0.357	0.366	0.359	0.36	0.357	0.352	0.354
18	0.402	0.395	0.399	0.451	0.45	0.443	0.397	0.391	0.389	0.433	0.42	0.424	0.367	0.354	0.356	0.365	0.359	0.361	0.358	0.355	0.353
18.5	0.402	0.397	0.4	0.454	0.452	0.447	0.398	0.392	0.39	0.435	0.422	0.426	0.368	0.354	0.357	0.366	0.358	0.361	0.358	0.362	0.354
19	0.403	0.398	0.401	0.456	0.455	0.448	0.399	0.394	0.39	0.436	0.424	0.426	0.368	0.355	0.357	0.367	0.359	0.36	0.359	0.369	0.354
19.5	0.405	0.399	0.401	0.458	0.458	0.451	0.4	0.393	0.391	0.438	0.426	0.428	0.369	0.355	0.357	0.366	0.358	0.362	0.359	0.377	0.354
20	0.405	0.399	0.402	0.46	0.46	0.453	0.4	0.396	0.392	0.439	0.427	0.43	0.368	0.355	0.357	0.366	0.36	0.361	0.358	0.378	0.354
20.5	0.406	0.4	0.403	0.462	0.463	0.455	0.403	0.395	0.392	0.441	0.429	0.432	0.369	0.355	0.357	0.366	0.358	0.361	0.359	0.376	0.353
21	0.406	0.4	0.404	0.465	0.463	0.457	0.401	0.397	0.394	0.443	0.43	0.433	0.369	0.355	0.358	0.366	0.358	0.361	0.359	0.37	0.353
21.5	0.407	0.402	0.405	0.468	0.466	0.46	0.402	0.398	0.395	0.444	0.431	0.434	0.371	0.355	0.358	0.368	0.36	0.361	0.359	0.359	0.353
22	0.406	0.402	0.405	0.469	0.466	0.462	0.404	0.399	0.395	0.446	0.432	0.435	0.369	0.355	0.356	0.367	0.359	0.361	0.36	0.353	0.353
22.5	0.41	0.404	0.407	0.471	0.47	0.464	0.405	0.399	0.396	0.447	0.435	0.437	0.368	0.355	0.359	0.367	0.361	0.362	0.359	0.354	0.353
23	0.41	0.406	0.408	0.473	0.473	0.466	0.406	0.402	0.398	0.45	0.437	0.438	0.369	0.356	0.359	0.367	0.361	0.362	0.359	0.354	0.355
23.5	0.41	0.403	0.408	0.476	0.474	0.468	0.406	0.4	0.397	0.451	0.437	0.44	0.369	0.355	0.359	0.366	0.36	0.361	0.359	0.354	0.354
24	0.411	0.405	0.408	0.478	0.476	0.471	0.407	0.402	0.399	0.452	0.44	0.441	0.369	0.355	0.358	0.367	0.36	0.362	0.359	0.354	0.353
24.5	0.412	0.407	0.411	0.481	0.479	0.472	0.408	0.403	0.4	0.454	0.441	0.442	0.37	0.356	0.358	0.366	0.36	0.362	0.359	0.353	0.353
25	0.413	0.407	0.41	0.482	0.482	0.474	0.408	0.404	0.401	0.457	0.443	0.445	0.37	0.355	0.359	0.367	0.361	0.361	0.359	0.354	0.354
25.5	0.413	0.408	0.412	0.484	0.483	0.477	0.409	0.404	0.402	0.457	0.442	0.446	0.37	0.355	0.359	0.368	0.36	0.362	0.36	0.353	0.352
26	0.415	0.408	0.413	0.485	0.485	0.48	0.41	0.405	0.402	0.459	0.444	0.447	0.37	0.355	0.359	0.368	0.361	0.363	0.36	0.353	0.353
26.5	0.415	0.41	0.411	0.488	0.487	0.48	0.411	0.405	0.403	0.46	0.447	0.446	0.37	0.355	0.358	0.368	0.359	0.362	0.359	0.354	0.352
27	0.417	0.411	0.414	0.491	0.491	0.483	0.411	0.407	0.405	0.462	0.449	0.449	0.37	0.357	0.36	0.367	0.36	0.362	0.359	0.354	0.353
27.5	0.418	0.412	0.415	0.493	0.492	0.485	0.412	0.407	0.406	0.463	0.45	0.451	0.371	0.356	0.36	0.368	0.36	0.362	0.359	0.355	0.354
28	0.417	0.412	0.415	0.495	0.493	0.489	0.413	0.408	0.406	0.464	0.451	0.453	0.37	0.355	0.359	0.367	0.361	0.363	0.36	0.354	0.353
28.5	0.418	0.413	0.416	0.497	0.496	0.492	0.414	0.409	0.405	0.468	0.453	0.454	0.371	0.357	0.36	0.367	0.361	0.362	0.359	0.354	0.354
29	0.419	0.415	0.416	0.499	0.499	0.493	0.415	0.41	0.408	0.469	0.456	0.457	0.37	0.356	0.36	0.368	0.362	0.363	0.359	0.355	0.352
29.5	0.42	0.413	0.416	0.501	0.5	0.494	0.416	0.411	0.408	0.471	0.456	0.455	0.371	0.358	0.359	0.369	0.362	0.363	0.36	0.354	0.353
30	0.421	0.415	0.417	0.503	0.503	0.496	0.415	0.41	0.41	0.473	0.456	0.46	0.369	0.355	0.359	0.368	0.36	0.362	0.359	0.354	0.353
30.5	0.422	0.416	0.417	0.506	0.505	0.499	0.415	0.412	0.409	0.474	0.459	0.459	0.37	0.356	0.359	0.368	0.361	0.364	0.359	0.354	0.354
31	0.422	0.416	0.418	0.507	0.507	0.499	0.416	0.413	0.411	0.475	0.46	0.461	0.37	0.356	0.358	0.367	0.361	0.364	0.358	0.354	0.353
31.5	0.424	0.418	0.42	0.511	0.51	0.503	0.418	0.415	0.413	0.478	0.462	0.463	0.371	0.357	0.361	0.369	0.362	0.364	0.359	0.356	0.354
32	0.423	0.417	0.42	0.512	0.513	0.505	0.42	0.415	0.413	0.479	0.465	0.465	0.372	0.357	0.359	0.368	0.362	0.364	0.359	0.355	0.354
32.5	0.425	0.42	0.422	0.514	0.515	0.508	0.42	0.415	0.414	0.483	0.466	0.467	0.373	0.356	0.36	0.368	0.362	0.364	0.359	0.355	0.354
33	0.426	0.421	0.422	0.517	0.516	0.51	0.422	0.417	0.415	0.482	0.467	0.469	0.371	0.358	0.361	0.368	0.363	0.365	0.36	0.355	0.355
33.5	0.427	0.42	0.423	0.519	0.519	0.513	0.422	0.417	0.415	0.486	0.469	0.47	0.372	0.357	0.361	0.369	0.362	0.364	0.359	0.355	0.353
34	0.428	0.42	0.423	0.521	0.52	0.513	0.423	0.417	0.416	0.485	0.471	0.471	0.372	0.356	0.359	0.369	0.362	0.364	0.359	0.356	0.352
34.5	0.428	0.421	0.423	0.521	0.522	0.515	0.422	0.418	0.416	0.486	0.47	0.472	0.371	0.357	0.358	0.368	0.361	0.363	0.357	0.354	0.353
35	0.429	0.422	0.425	0.525	0.525	0.517	0.425	0.419	0.418	0.489	0.474	0.474	0.372	0.358	0.36	0.369	0.363	0.365	0.36	0.356	0.354
35.5	0.43	0.425	0.427	0.526	0.527	0.52	0.424	0.421	0.419	0.491	0.475	0.477	0.373	0.358	0.361	0.369	0.363	0.363	0.36	0.359	0.355
36	0.431	0.424	0.426	0.529	0.53	0.523	0.427	0.42	0.42	0.492	0.476	0.477	0.371	0.359	0.359	0.369	0.362	0.365	0.359	0.362	0.354
36.5	0.432	0.426	0.429	0.532	0.534	0.526	0.425	0.422	0.421	0.495	0.478	0.479	0.373	0.358	0.362	0.37	0.363	0.365	0.36	0.367	0.355
37	0.431	0.427	0.429	0.534	0.535	0.528	0.428	0.422	0.421	0.495	0.479	0.481	0.372	0.357	0.362	0.369	0.362	0.366	0.358	0.371	0.355
37.5	0.434	0.427	0.429	0.536	0.537	0.53	0.429	0.422	0.422	0.495	0.48	0.481	0.373	0.357	0.361	0.37	0.363	0.365	0.36	0.375	0.355
38	0.435	0.428	0.429	0.538	0.538	0.532	0.429	0.424	0.424	0.499	0.482	0.484	0.372	0.358	0.36	0.37	0.364	0.365	0.359	0.375	0.355
38.5	0.435	0.427	0.431	0.539	0.538	0.533	0.43	0.424	0.423	0.499	0.482	0.486	0.373	0.357	0.361	0.369	0.363	0.365	0.361	0.375	0.354
39	0.435	0.43	0.432	0.542	0.541	0.535	0.43	0.424	0.424	0.5	0.484	0.486	0.372	0.358	0.36	0.37	0.362	0.363	0.359	0.371	0.354
39.5	0.437	0.431	0.432	0.544	0.545	0.539	0.431	0.425	0.424	0.501	0.485	0.488	0.374	0.359	0.361	0.371	0.363	0.366	0.36	0.366	0.355
40	0.437	0.43	0.432	0.545	0.544	0.54	0.432	0.425	0.425	0.501	0.487	0.489	0.373	0.359	0.36	0.371	0.361	0.366	0.36	0.36	0.354
40.5	0.438	0.432	0.433	0.548	0.546	0.543	0.433	0.426	0.427	0.503	0.488	0.491	0.373	0.359	0.362	0.371	0.364	0.365	0.361	0.357	0.354
41	0.438	0.432	0.435	0.551	0.548	0.544	0.433	0.427	0.427	0.504	0.49	0.492	0.373	0.359	0.362	0.368	0.363	0.365	0.36	0.355	0.355
41.5	0.44	0.435	0.436	0.553	0.55	0.547	0.434	0.429	0.428	0.507	0.491	0.494	0.374	0.359	0.362	0.37	0.363	0.365	0.361	0.355	0.355
42	0.44	0.434	0.436	0.554	0.552	0.548	0.435	0.43	0.427	0.508	0.491	0.497	0.373	0.358	0.361	0.37	0.363	0.365	0.36	0.354	0.354
42.5	0.441	0.434	0.437	0.557	0.553	0.549	0.436	0.429	0.429	0.51	0.493	0.496	0.373	0.359	0.361	0.369	0.362	0.366	0.359	0.354	0.354
43	0.441	0.435	0.438	0.559	0.555	0.553	0.435	0.431	0.43	0.513	0.494	0.499	0.373	0.359	0.361	0.369	0.365	0.365	0.359	0.355	0.355
43.5	0.443	0.436	0.439	0.563	0.558	0.555	0.437	0.432	0.431	0.514	0.497	0.501	0.374	0.359	0.363	0.37	0.366	0.366	0.36	0.357	0.355
44	0.444	0.438	0.44	0.565	0.56	0.557	0.438	0.433	0.432	0.514	0.498	0.501	0.373	0.361	0.363	0.371	0.364	0.365	0.361	0.355	0.355
44.5	0.444	0.438	0.441	0.566	0.562	0.559	0.438	0.433	0.432	0.517	0.499	0.504	0.374	0.359	0.362	0.37	0.364	0.367	0.36	0.354	0.354
45	0.446	0.438	0.44	0.568	0.564	0.561	0.44	0.434	0.434	0.518	0.501	0.506	0.372	0.361	0.362	0.37	0.364	0.366	0.359	0.355	0.355
45.5	0.446	0.44	0.444	0.57	0.566	0.565	0.439	0.435	0.435	0.52	0.502	0.506	0.375	0.36	0.364	0.371	0.365	0.367	0.361	0.356	0.356
46	0.448	0.44	0.444	0.571	0.569	0.566	0.441	0.436	0.436	0.522	0.505	0.508	0.374	0.362	0.363	0.371	0.366	0.368	0.361	0.356	0.355
46.5	0.448	0.439	0.444	0.572	0.57	0.568	0.441	0.436	0.435	0.522	0.504	0.508	0.374	0.361	0.362	0.37	0.364	0.367	0.36	0.355	0.355
47	0.447	0.442	0.445	0.576	0.573	0.571	0.441	0.437	0.437	0.526	0.507	0.512	0.375	0.362	0.363	0.372	0.366	0.367	0.361	0.356	0.357
47.5	0.45	0.442	0.447	0.577	0.575	0.574	0.442	0.439	0.439	0.527	0.508	0.514	0.375	0.361	0.363	0.371	0.365	0.368	0.361	0.357	0.356
48	0.449	0.442	0.447	0.579	0.576	0.574	0.444	0.44	0.438	0.529	0.51	0.515	0.376	0.361	0.363	0.371	0.365	0.367	0.361	0.356	0.355
48.5	0.451	0.445	0.448	0.581	0.579	0.576	0.445	0.44	0.441	0.53	0.511	0.515	0.376	0.36	0.363	0.37	0.366	0.367	0.362	0.356	0.355
49	0.45	0.446	0.449	0.583	0.582	0.58	0.445	0.442	0.441	0.532	0.513	0.518	0.375	0.363	0.363	0.372	0.365	0.367	0.361	0.355	0.356
49.5	0.453	0.445	0.45	0.586	0.583	0.584	0.447	0.443	0.443	0.534	0.514	0.521	0.376	0.361	0.365	0.373	0.365	0.368	0.36	0.357	0.357
50	0.452	0.446	0.451	0.588	0.585	0.584	0.447	0.443	0.442	0.536	0.515	0.521	0.376	0.362	0.364	0.372	0.366	0.368	0.362	0.356	0.357
50.5	0.453	0.447	0.452	0.591	0.588	0.586	0.448	0.443	0.443	0.537	0.517	0.522	0.376	0.361	0.362	0.371	0.366	0.368	0.361	0.357	0.356
51	0.455	0.447	0.453	0.592	0.59	0.587	0.448	0.444	0.444	0.537	0.518	0.524	0.376	0.363	0.364	0.372	0.366	0.368	0.362	0.356	0.357
51.5	0.454	0.447	0.453	0.596	0.592	0.59	0.45	0.445	0.446	0.54	0.519	0.525	0.376	0.362	0.363	0.373	0.367	0.368	0.362	0.356	0.357
52	0.455	0.448	0.454	0.598	0.593	0.593	0.45	0.446	0.446	0.542	0.521	0.527	0.376	0.363	0.365	0.372	0.366	0.369	0.362	0.356	0.357
52.5	0.455	0.45	0.454	0.599	0.595	0.593	0.452	0.446	0.446	0.542	0.522	0.528	0.376	0.362	0.364	0.372	0.367	0.368	0.362	0.356	0.355
53	0.457	0.45	0.454	0.601	0.598	0.596	0.452	0.446	0.446	0.545	0.526	0.529	0.376	0.364	0.363	0.372	0.367	0.368	0.362	0.357	0.356
53.5	0.457	0.452	0.456	0.605	0.601	0.599	0.453	0.447	0.448	0.544	0.526	0.532	0.376	0.363	0.365	0.373	0.367	0.369	0.362	0.357	0.357
54	0.456	0.451	0.456	0.605	0.6	0.599	0.452	0.447	0.447	0.546	0.527	0.531	0.376	0.362	0.363	0.371	0.366	0.369	0.361	0.355	0.355
54.5	0.459	0.452	0.457	0.609	0.604	0.603	0.453	0.448	0.448	0.548	0.529	0.533	0.376	0.361	0.364	0.372	0.367	0.368	0.361	0.357	0.357
55	0.458	0.453	0.458	0.608	0.606	0.606	0.454	0.45	0.45	0.549	0.531	0.536	0.376	0.363	0.364	0.372	0.366	0.368	0.361	0.357	0.357
55.5	0.461	0.454	0.46	0.611	0.608	0.606	0.454	0.452	0.45	0.55	0.533	0.537	0.376	0.362	0.365	0.372	0.367	0.369	0.361	0.356	0.356
56	0.461	0.455	0.457	0.613	0.61	0.609	0.457	0.452	0.452	0.555	0.534	0.539	0.377	0.363	0.365	0.373	0.368	0.368	0.362	0.355	0.358
56.5	0.461	0.456	0.46	0.617	0.612	0.611	0.457	0.453	0.452	0.556	0.535	0.538	0.377	0.363	0.364	0.373	0.367	0.369	0.361	0.357	0.356
57	0.462	0.457	0.461	0.619	0.615	0.612	0.457	0.453	0.453	0.557	0.536	0.541	0.378	0.363	0.365	0.373	0.368	0.369	0.361	0.356	0.357
57.5	0.464	0.456	0.461	0.621	0.617	0.617	0.459	0.455	0.454	0.56	0.539	0.544	0.378	0.363	0.366	0.373	0.37	0.369	0.362	0.357	0.358
58	0.464	0.458	0.463	0.623	0.62	0.618	0.459	0.455	0.456	0.561	0.54	0.545	0.378	0.364	0.367	0.375	0.369	0.37	0.363	0.358	0.357
58.5	0.466	0.46	0.464	0.627	0.622	0.62	0.461	0.456	0.456	0.563	0.542	0.547	0.378	0.365	0.365	0.375	0.37	0.37	0.363	0.357	0.359
59	0.466	0.46	0.464	0.627	0.623	0.621	0.461	0.456	0.456	0.565	0.544	0.547	0.377	0.364	0.365	0.375	0.369	0.369	0.362	0.357	0.357
59.5	0.466	0.461	0.465	0.629	0.624	0.624	0.461	0.457	0.456	0.565	0.544	0.549	0.377	0.364	0.365	0.374	0.368	0.37	0.361	0.357	0.356
60	0.468	0.462	0.467	0.633	0.629	0.628	0.463	0.46	0.459	0.568	0.547	0.551	0.379	0.364	0.367	0.374	0.369	0.371	0.363	0.359	0.359
60.5	0.468	0.461	0.467	0.635	0.629	0.629	0.463	0.459	0.459	0.568	0.548	0.552	0.377	0.363	0.365	0.375	0.367	0.37	0.362	0.357	0.356
61	0.47	0.464	0.467	0.638	0.632	0.632	0.465	0.46	0.461	0.571	0.55	0.554	0.379	0.365	0.365	0.374	0.368	0.369	0.362	0.357	0.357
61.5	0.47	0.463	0.468	0.639	0.633	0.633	0.464	0.46	0.46	0.571	0.551	0.555	0.379	0.363	0.366	0.375	0.369	0.369	0.362	0.356	0.358
62	0.471	0.465	0.469	0.641	0.637	0.635	0.465	0.461	0.462	0.573	0.553	0.558	0.377	0.365	0.365	0.376	0.37	0.37	0.361	0.357	0.357
62.5	0.472	0.467	0.471	0.644	0.639	0.638	0.468	0.463	0.462	0.576	0.557	0.561	0.379	0.365	0.368	0.376	0.372	0.372	0.363	0.358	0.358
63	0.473	0.465	0.47	0.644	0.641	0.638	0.467	0.461	0.462	0.577	0.556	0.559	0.378	0.365	0.366	0.376	0.37	0.371	0.362	0.358	0.357
63.5	0.475	0.467	0.472	0.648	0.641	0.643	0.469	0.463	0.464	0.579	0.558	0.563	0.38	0.364	0.367	0.376	0.372	0.371	0.363	0.359	0.358
64	0.474	0.468	0.472	0.65	0.645	0.644	0.47	0.465	0.464	0.581	0.56	0.564	0.379	0.366	0.366	0.375	0.371	0.37	0.363	0.358	0.357
64.5	0.477	0.469	0.474	0.652	0.648	0.648	0.47	0.466	0.466	0.581	0.563	0.567	0.379	0.366	0.369	0.375	0.371	0.372	0.363	0.358	0.358
65	0.474	0.469	0.473	0.653	0.649	0.648	0.47	0.465	0.466	0.583	0.562	0.565	0.378	0.365	0.366	0.375	0.371	0.372	0.362	0.357	0.357
65.5	0.476	0.47	0.475	0.656	0.65	0.65	0.471	0.466	0.467	0.585	0.564	0.568	0.38	0.365	0.368	0.376	0.372	0.371	0.363	0.359	0.359
66	0.479	0.472	0.477	0.66	0.658	0.654	0.475	0.469	0.47	0.588	0.568	0.571	0.382	0.368	0.369	0.377	0.373	0.374	0.363	0.359	0.36
66.5	0.478	0.473	0.478	0.661	0.657	0.654	0.473	0.469	0.469	0.589	0.569	0.571	0.38	0.366	0.367	0.376	0.372	0.372	0.363	0.358	0.359
67	0.479	0.473	0.477	0.664	0.657	0.658	0.473	0.469	0.47	0.589	0.567	0.573	0.379	0.366	0.368	0.376	0.37	0.372	0.362	0.358	0.357
67.5	0.482	0.475	0.48	0.668	0.662	0.66	0.477	0.472	0.472	0.593	0.572	0.577	0.381	0.368	0.369	0.378	0.372	0.372	0.364	0.36	0.359
68	0.482	0.474	0.479	0.668	0.663	0.663	0.475	0.471	0.472	0.594	0.573	0.576	0.378	0.367	0.368	0.377	0.371	0.373	0.363	0.359	0.36
68.5	0.483	0.474	0.48	0.669	0.664	0.664	0.475	0.471	0.472	0.595	0.573	0.578	0.38	0.367	0.367	0.378	0.37	0.373	0.363	0.358	0.359
69	0.483	0.476	0.482	0.673	0.668	0.667	0.478	0.473	0.474	0.598	0.575	0.58	0.381	0.367	0.369	0.378	0.371	0.373	0.363	0.359	0.359
69.5	0.482	0.476	0.479	0.673	0.667	0.665	0.476	0.471	0.473	0.598	0.574	0.579	0.379	0.366	0.367	0.378	0.37	0.373	0.361	0.357	0.357
70	0.483	0.477	0.481	0.676	0.672	0.67	0.478	0.474	0.474	0.6	0.578	0.583	0.38	0.366	0.368	0.378	0.371	0.373	0.363	0.357	0.358
70.5	0.485	0.48	0.483	0.678	0.673	0.673	0.479	0.474	0.476	0.602	0.58	0.584	0.38	0.367	0.368	0.378	0.372	0.373	0.363	0.357	0.359
71	0.484	0.479	0.484	0.679	0.674	0.674	0.479	0.475	0.477	0.602	0.58	0.585	0.38	0.367	0.368	0.377	0.371	0.373	0.363	0.357	0.358
71.5	0.488	0.479	0.485	0.684	0.678	0.677	0.48	0.476	0.477	0.604	0.582	0.587	0.381	0.369	0.368	0.377	0.372	0.374	0.363	0.358	0.358
72	0.486	0.481	0.485	0.684	0.677	0.677	0.481	0.477	0.479	0.607	0.583	0.588	0.381	0.367	0.369	0.378	0.369	0.374	0.363	0.359	0.359
72.5	0.487	0.481	0.485	0.687	0.68	0.677	0.482	0.478	0.479	0.607	0.585	0.589	0.381	0.366	0.369	0.377	0.372	0.373	0.363	0.357	0.358
73	0.488	0.482	0.488	0.688	0.685	0.682	0.483	0.479	0.479	0.61	0.588	0.591	0.38	0.367	0.368	0.378	0.371	0.373	0.363	0.358	0.358
73.5	0.491	0.482	0.487	0.692	0.685	0.684	0.483	0.478	0.479	0.612	0.588	0.592	0.38	0.366	0.369	0.378	0.373	0.372	0.364	0.358	0.358
74	0.491	0.485	0.488	0.693	0.688	0.688	0.485	0.481	0.481	0.615	0.591	0.596	0.381	0.368	0.369	0.378	0.372	0.374	0.364	0.358	0.359
74.5	0.491	0.484	0.489	0.695	0.691	0.687	0.485	0.48	0.481	0.614	0.591	0.595	0.381	0.367	0.37	0.378	0.373	0.373	0.363	0.359	0.358
75	0.493	0.487	0.491	0.697	0.693	0.693	0.487	0.482	0.482	0.618	0.593	0.598	0.382	0.369	0.37	0.379	0.373	0.373	0.364	0.359	0.359
75.5	0.493	0.486	0.49	0.698	0.693	0.693	0.486	0.482	0.483	0.618	0.593	0.599	0.381	0.369	0.369	0.378	0.374	0.374	0.363	0.358	0.358
76	0.493	0.486	0.49	0.701	0.695	0.695	0.486	0.483	0.484	0.619	0.595	0.601	0.381	0.367	0.37	0.377	0.372	0.373	0.363	0.359	0.359
76.5	0.495	0.488	0.493	0.703	0.697	0.698	0.489	0.483	0.485	0.621	0.597	0.602	0.382	0.368	0.369	0.378	0.372	0.374	0.363	0.359	0.358
77	0.496	0.49	0.494	0.705	0.7	0.702	0.49	0.485	0.487	0.623	0.6	0.604	0.382	0.369	0.371	0.38	0.374	0.375	0.364	0.36	0.36
77.5	0.495	0.49	0.494	0.707	0.701	0.702	0.491	0.486	0.486	0.624	0.601	0.605	0.382	0.368	0.37	0.379	0.372	0.374	0.364	0.359	0.359
78	0.497	0.49	0.495	0.711	0.704	0.704	0.491	0.486	0.488	0.627	0.603	0.607	0.383	0.369	0.37	0.38	0.373	0.374	0.364	0.36	0.36
78.5	0.497	0.492	0.495	0.711	0.706	0.705	0.492	0.488	0.487	0.628	0.604	0.608	0.382	0.369	0.37	0.378	0.374	0.374	0.363	0.359	0.36
79	0.5	0.492	0.498	0.714	0.707	0.708	0.492	0.488	0.489	0.631	0.606	0.61	0.383	0.369	0.371	0.379	0.374	0.375	0.364	0.36	0.358
79.5	0.5	0.492	0.498	0.717	0.709	0.71	0.493	0.487	0.49	0.63	0.606	0.611	0.383	0.368	0.37	0.379	0.372	0.375	0.364	0.36	0.359
80	0.501	0.494	0.498	0.718	0.713	0.711	0.494	0.49	0.492	0.631	0.61	0.614	0.383	0.369	0.371	0.379	0.375	0.375	0.364	0.36	0.36
80.5	0.5	0.495	0.5	0.72	0.716	0.715	0.496	0.491	0.493	0.633	0.611	0.614	0.383	0.37	0.371	0.379	0.374	0.375	0.364	0.361	0.36
81	0.5	0.495	0.497	0.723	0.716	0.716	0.494	0.491	0.492	0.633	0.612	0.615	0.381	0.369	0.37	0.38	0.374	0.379	0.363	0.36	0.358
81.5	0.503	0.497	0.501	0.725	0.719	0.719	0.497	0.491	0.494	0.638	0.615	0.618	0.384	0.37	0.371	0.38	0.375	0.376	0.365	0.36	0.359
82	0.503	0.497	0.502	0.726	0.721	0.722	0.496	0.494	0.495	0.64	0.617	0.62	0.383	0.37	0.371	0.381	0.374	0.375	0.364	0.359	0.358
82.5	0.504	0.497	0.5	0.73	0.721	0.722	0.498	0.493	0.496	0.639	0.616	0.62	0.382	0.369	0.371	0.38	0.373	0.375	0.364	0.359	0.358
83	0.504	0.498	0.503	0.731	0.724	0.726	0.498	0.493	0.495	0.641	0.617	0.621	0.383	0.369	0.369	0.38	0.373	0.375	0.363	0.359	0.359
83.5	0.505	0.498	0.504	0.732	0.726	0.726	0.499	0.494	0.496	0.645	0.62	0.624	0.383	0.369	0.371	0.38	0.373	0.375	0.363	0.359	0.359
84	0.505	0.5	0.504	0.735	0.729	0.729	0.499	0.495	0.497	0.644	0.62	0.626	0.383	0.369	0.372	0.38	0.374	0.376	0.364	0.359	0.359
84.5	0.507	0.5	0.505	0.735	0.732	0.73	0.501	0.496	0.498	0.646	0.623	0.626	0.383	0.37	0.372	0.38	0.374	0.375	0.364	0.359	0.359
85	0.508	0.5	0.506	0.738	0.734	0.732	0.5	0.497	0.499	0.646	0.624	0.628	0.382	0.37	0.371	0.379	0.374	0.376	0.363	0.358	0.358
85.5	0.508	0.502	0.507	0.741	0.735	0.736	0.503	0.497	0.501	0.65	0.625	0.63	0.383	0.369	0.371	0.381	0.376	0.378	0.365	0.36	0.359
86	0.511	0.505	0.508	0.742	0.737	0.738	0.503	0.5	0.502	0.651	0.627	0.632	0.383	0.371	0.372	0.381	0.376	0.386	0.363	0.359	0.36
86.5	0.51	0.503	0.509	0.745	0.737	0.738	0.504	0.499	0.501	0.652	0.629	0.631	0.383	0.37	0.372	0.381	0.376	0.377	0.364	0.36	0.36
87	0.511	0.505	0.51	0.748	0.742	0.74	0.506	0.501	0.503	0.655	0.63	0.634	0.384	0.37	0.372	0.382	0.377	0.377	0.366	0.359	0.359
87.5	0.513	0.507	0.509	0.751	0.744	0.742	0.506	0.503	0.503	0.657	0.632	0.636	0.384	0.37	0.371	0.381	0.378	0.379	0.365	0.359	0.359
88	0.513	0.505	0.51	0.752	0.746	0.743	0.507	0.501	0.504	0.659	0.634	0.638	0.384	0.371	0.371	0.381	0.379	0.388	0.364	0.36	0.36
88.5	0.513	0.507	0.513	0.754	0.746	0.747	0.508	0.501	0.505	0.659	0.635	0.639	0.384	0.371	0.372	0.38	0.378	0.389	0.365	0.36	0.359
89	0.515	0.508	0.513	0.756	0.75	0.75	0.509	0.504	0.506	0.662	0.635	0.642	0.385	0.371	0.371	0.381	0.377	0.378	0.364	0.36	0.359
89.5	0.516	0.509	0.513	0.757	0.749	0.751	0.508	0.504	0.506	0.663	0.638	0.642	0.387	0.372	0.373	0.382	0.377	0.377	0.364	0.36	0.361
90	0.516	0.51	0.515	0.761	0.753	0.755	0.51	0.506	0.508	0.665	0.639	0.644	0.385	0.372	0.374	0.382	0.377	0.378	0.365	0.36	0.361
90.5	0.516	0.51	0.514	0.761	0.754	0.754	0.51	0.505	0.509	0.665	0.638	0.645	0.385	0.372	0.373	0.382	0.376	0.377	0.364	0.359	0.36
91	0.516	0.51	0.515	0.763	0.757	0.756	0.509	0.506	0.508	0.667	0.642	0.647	0.385	0.371	0.372	0.381	0.376	0.377	0.365	0.36	0.358
91.5	0.519	0.514	0.518	0.766	0.761	0.761	0.512	0.509	0.511	0.672	0.645	0.65	0.386	0.372	0.372	0.382	0.377	0.378	0.364	0.361	0.361
92	0.52	0.514	0.518	0.767	0.76	0.761	0.514	0.508	0.512	0.67	0.644	0.652	0.386	0.371	0.372	0.383	0.376	0.378	0.364	0.361	0.36
92.5	0.52	0.516	0.519	0.77	0.761	0.764	0.513	0.51	0.511	0.674	0.646	0.653	0.386	0.371	0.373	0.382	0.378	0.377	0.366	0.36	0.359
93	0.521	0.515	0.517	0.772	0.764	0.763	0.514	0.509	0.512	0.675	0.647	0.651	0.385	0.371	0.371	0.382	0.375	0.377	0.364	0.359	0.358
93.5	0.52	0.518	0.521	0.775	0.767	0.768	0.516	0.511	0.515	0.675	0.65	0.654	0.385	0.372	0.373	0.383	0.377	0.387	0.365	0.361	0.36
94	0.523	0.518	0.522	0.775	0.769	0.769	0.514	0.51	0.513	0.677	0.651	0.656	0.386	0.371	0.374	0.383	0.376	0.397	0.365	0.361	0.359
94.5	0.526	0.518	0.523	0.78	0.771	0.771	0.517	0.513	0.515	0.682	0.654	0.66	0.386	0.373	0.375	0.383	0.378	0.394	0.365	0.361	0.361
95	0.524	0.519	0.523	0.778	0.771	0.773	0.517	0.512	0.515	0.68	0.654	0.659	0.385	0.372	0.374	0.383	0.375	0.394	0.365	0.361	0.359
95.5	0.523	0.519	0.524	0.78	0.774	0.775	0.519	0.515	0.517	0.681	0.654	0.66	0.385	0.372	0.373	0.383	0.378	0.392	0.364	0.361	0.36
96	0.525	0.521	0.523	0.783	0.775	0.776	0.519	0.514	0.516	0.684	0.656	0.664	0.387	0.372	0.374	0.383	0.377	0.382	0.366	0.36	0.358
96.5	0.528	0.522	0.526	0.786	0.778	0.777	0.521	0.515	0.518	0.686	0.658	0.664	0.387	0.374	0.375	0.383	0.378	0.384	0.365	0.361	0.36
97	0.53	0.522	0.526	0.79	0.78	0.781	0.521	0.514	0.52	0.69	0.661	0.666	0.388	0.374	0.375	0.384	0.379	0.391	0.366	0.362	0.361
97.5	0.528	0.521	0.525	0.788	0.781	0.781	0.521	0.515	0.519	0.689	0.661	0.665	0.386	0.372	0.373	0.383	0.377	0.392	0.365	0.36	0.359
98	0.529	0.524	0.527	0.789	0.783	0.784	0.523	0.518	0.52	0.69	0.663	0.668	0.387	0.373	0.376	0.384	0.379	0.39	0.365	0.361	0.361
98.5	0.529	0.524	0.527	0.794	0.785	0.785	0.523	0.517	0.521	0.69	0.665	0.668	0.385	0.372	0.373	0.383	0.379	0.383	0.364	0.362	0.36
99	0.531	0.526	0.529	0.795	0.789	0.79	0.525	0.52	0.522	0.694	0.667	0.672	0.388	0.374	0.375	0.384	0.38	0.38	0.367	0.361	0.36
99.5	0.532	0.527	0.531	0.797	0.789	0.789	0.525	0.521	0.523	0.696	0.668	0.672	0.387	0.374	0.375	0.385	0.38	0.379	0.366	0.362	0.361
100	0.533	0.526	0.53	0.798	0.79	0.792	0.526	0.521	0.523	0.696	0.669	0.673	0.387	0.372	0.375	0.383	0.378	0.378	0.365	0.36	0.36
100.5	0.534	0.528	0.531	0.802	0.792	0.792	0.526	0.521	0.524	0.699	0.672	0.675	0.387	0.373	0.375	0.385	0.378	0.381	0.365	0.361	0.361
101	0.535	0.529	0.534	0.801	0.795	0.795	0.527	0.524	0.527	0.7	0.673	0.677	0.388	0.376	0.377	0.386	0.38	0.389	0.366	0.362	0.361
101.5	0.534	0.529	0.533	0.803	0.796	0.797	0.527	0.524	0.526	0.701	0.675	0.678	0.388	0.373	0.377	0.384	0.379	0.389	0.366	0.362	0.36
102	0.536	0.53	0.535	0.805	0.8	0.797	0.529	0.523	0.527	0.704	0.676	0.681	0.386	0.375	0.376	0.384	0.379	0.386	0.365	0.361	0.361
102.5	0.537	0.53	0.535	0.808	0.802	0.801	0.529	0.525	0.529	0.705	0.678	0.681	0.387	0.375	0.375	0.384	0.38	0.383	0.366	0.362	0.361
103	0.537	0.531	0.535	0.807	0.801	0.802	0.53	0.526	0.528	0.705	0.678	0.683	0.386	0.373	0.375	0.385	0.377	0.384	0.364	0.361	0.36
103.5	0.538	0.532	0.537	0.811	0.806	0.805	0.533	0.526	0.53	0.708	0.681	0.685	0.387	0.373	0.376	0.387	0.38	0.394	0.365	0.362	0.361
104	0.539	0.532	0.537	0.812	0.806	0.806	0.533	0.527	0.529	0.71	0.681	0.685	0.388	0.374	0.374	0.385	0.38	0.394	0.366	0.362	0.36
104.5	0.54	0.534	0.538	0.814	0.806	0.807	0.532	0.528	0.53	0.71	0.682	0.688	0.387	0.374	0.375	0.384	0.379	0.393	0.365	0.361	0.361
105	0.543	0.538	0.54	0.821	0.811	0.813	0.535	0.531	0.534	0.713	0.688	0.692	0.39	0.376	0.377	0.388	0.382	0.397	0.367	0.363	0.363
105.5	0.54	0.535	0.538	0.818	0.81	0.809	0.532	0.53	0.532	0.713	0.685	0.69	0.388	0.375	0.376	0.385	0.38	0.394	0.366	0.361	0.36
106	0.542	0.536	0.54	0.822	0.813	0.813	0.536	0.53	0.533	0.716	0.688	0.691	0.387	0.374	0.375	0.385	0.38	0.391	0.365	0.361	0.36
106.5	0.543	0.537	0.542	0.823	0.816	0.815	0.535	0.532	0.534	0.719	0.691	0.696	0.388	0.375	0.377	0.386	0.382	0.384	0.367	0.362	0.361
107	0.544	0.539	0.543	0.826	0.818	0.816	0.538	0.533	0.535	0.72	0.691	0.697	0.388	0.375	0.376	0.386	0.381	0.382	0.365	0.361	0.361
107.5	0.543	0.538	0.541	0.822	0.817	0.817	0.537	0.532	0.535	0.72	0.691	0.695	0.387	0.374	0.375	0.386	0.379	0.38	0.365	0.36	0.361
108	0.545	0.54	0.544	0.824	0.821	0.819	0.537	0.534	0.536	0.721	0.693	0.698	0.388	0.375	0.376	0.386	0.379	0.381	0.365	0.361	0.361
108.5	0.547	0.541	0.545	0.83	0.82	0.821	0.539	0.534	0.538	0.724	0.695	0.7	0.389	0.377	0.377	0.387	0.379	0.382	0.366	0.362	0.361
109	0.546	0.541	0.544	0.829	0.822	0.821	0.538	0.534	0.537	0.724	0.695	0.701	0.388	0.375	0.376	0.385	0.379	0.381	0.366	0.361	0.36
109.5	0.548	0.542	0.546	0.833	0.825	0.824	0.54	0.536	0.538	0.727	0.698	0.701	0.388	0.374	0.375	0.386	0.38	0.382	0.366	0.362	0.361
110	0.549	0.544	0.548	0.834	0.828	0.828	0.542	0.536	0.54	0.728	0.7	0.705	0.39	0.376	0.378	0.387	0.38	0.383	0.366	0.362	0.36
110.5	0.549	0.545	0.548	0.831	0.828	0.829	0.543	0.539	0.542	0.729	0.703	0.707	0.39	0.375	0.379	0.387	0.381	0.393	0.367	0.363	0.361
111	0.55	0.544	0.548	0.836	0.829	0.828	0.543	0.537	0.542	0.73	0.704	0.706	0.388	0.375	0.375	0.386	0.379	0.394	0.365	0.36	0.361
111.5	0.552	0.547	0.55	0.84	0.833	0.832	0.543	0.539	0.544	0.735	0.706	0.711	0.39	0.376	0.378	0.387	0.382	0.383	0.366	0.362	0.362
112	0.55	0.547	0.55	0.839	0.831	0.834	0.544	0.541	0.543	0.734	0.705	0.711	0.39	0.375	0.376	0.388	0.381	0.384	0.366	0.361	0.36
112.5	0.553	0.548	0.553	0.842	0.835	0.835	0.546	0.543	0.545	0.737	0.708	0.714	0.389	0.376	0.377	0.387	0.381	0.39	0.366	0.363	0.362
113	0.553	0.547	0.55	0.841	0.833	0.834	0.544	0.541	0.543	0.739	0.707	0.711	0.39	0.376	0.377	0.386	0.381	0.392	0.366	0.36	0.36
113.5	0.555	0.55	0.552	0.845	0.838	0.836	0.547	0.543	0.546	0.738	0.711	0.716	0.389	0.378	0.377	0.387	0.381	0.391	0.366	0.361	0.361
114	0.555	0.549	0.553	0.846	0.839	0.836	0.548	0.544	0.546	0.739	0.711	0.716	0.389	0.376	0.376	0.387	0.382	0.384	0.365	0.362	0.361
114.5	0.555	0.553	0.554	0.846	0.839	0.842	0.548	0.545	0.547	0.743	0.714	0.718	0.39	0.376	0.377	0.388	0.381	0.383	0.366	0.362	0.361
115	0.557	0.551	0.555	0.847	0.841	0.84	0.548	0.544	0.548	0.742	0.712	0.718	0.388	0.376	0.377	0.388	0.381	0.382	0.365	0.361	0.36
115.5	0.556	0.551	0.556	0.849	0.843	0.843	0.55	0.545	0.549	0.744	0.714	0.721	0.39	0.377	0.378	0.389	0.381	0.383	0.366	0.361	0.362
116	0.56	0.553	0.557	0.851	0.845	0.844	0.551	0.546	0.55	0.746	0.715	0.722	0.39	0.377	0.378	0.389	0.381	0.382	0.365	0.362	0.36
116.5	0.559	0.553	0.557	0.855	0.845	0.845	0.551	0.547	0.548	0.75	0.717	0.723	0.39	0.377	0.377	0.388	0.382	0.382	0.365	0.361	0.361
117	0.56	0.553	0.557	0.852	0.846	0.848	0.553	0.547	0.551	0.748	0.719	0.725	0.39	0.377	0.378	0.388	0.381	0.382	0.366	0.362	0.361
117.5	0.561	0.555	0.559	0.853	0.849	0.847	0.553	0.55	0.552	0.752	0.721	0.726	0.39	0.378	0.377	0.388	0.382	0.383	0.367	0.363	0.362
118	0.561	0.556	0.56	0.856	0.851	0.85	0.554	0.55	0.553	0.751	0.722	0.729	0.391	0.378	0.379	0.388	0.382	0.386	0.366	0.362	0.361
118.5	0.562	0.559	0.56	0.858	0.851	0.852	0.555	0.55	0.553	0.754	0.724	0.728	0.392	0.378	0.379	0.389	0.384	0.39	0.367	0.362	0.362
119	0.565	0.559	0.562	0.86	0.855	0.855	0.557	0.553	0.556	0.756	0.728	0.732	0.392	0.379	0.38	0.389	0.383	0.384	0.367	0.364	0.362
119.5	0.564	0.558	0.562	0.861	0.853	0.855	0.556	0.552	0.554	0.758	0.727	0.73	0.391	0.376	0.377	0.389	0.382	0.383	0.365	0.36	0.361
120	0.566	0.561	0.564	0.863	0.857	0.856	0.556	0.554	0.557	0.76	0.731	0.735	0.392	0.379	0.38	0.39	0.383	0.385	0.368	0.363	0.363
120.5	0.565	0.561	0.565	0.863	0.858	0.857	0.557	0.554	0.557	0.76	0.73	0.735	0.391	0.377	0.379	0.39	0.381	0.385	0.365	0.363	0.362
121	0.568	0.563	0.564	0.866	0.858	0.859	0.559	0.554	0.558	0.764	0.734	0.738	0.391	0.379	0.379	0.389	0.383	0.386	0.367	0.362	0.361
121.5	0.569	0.564	0.567	0.866	0.861	0.859	0.559	0.557	0.56	0.763	0.733	0.739	0.392	0.378	0.379	0.39	0.384	0.388	0.367	0.362	0.362
122	0.567	0.563	0.566	0.867	0.86	0.862	0.561	0.556	0.558	0.765	0.735	0.742	0.392	0.379	0.379	0.389	0.383	0.384	0.367	0.362	0.362
122.5	0.569	0.563	0.566	0.865	0.861	0.86	0.559	0.555	0.558	0.765	0.733	0.741	0.39	0.378	0.378	0.389	0.382	0.383	0.366	0.361	0.361
123	0.571	0.564	0.569	0.869	0.863	0.861	0.563	0.559	0.561	0.768	0.738	0.743	0.392	0.379	0.38	0.39	0.384	0.384	0.366	0.363	0.362
123.5	0.571	0.566	0.569	0.869	0.866	0.864	0.562	0.559	0.562	0.768	0.739	0.744	0.391	0.378	0.38	0.39	0.383	0.385	0.366	0.362	0.363
124	0.572	0.566	0.568	0.871	0.864	0.863	0.563	0.558	0.564	0.769	0.738	0.745	0.391	0.378	0.378	0.389	0.383	0.383	0.366	0.363	0.361
124.5	0.572	0.567	0.571	0.872	0.866	0.868	0.564	0.561	0.563	0.771	0.74	0.748	0.391	0.379	0.38	0.389	0.383	0.385	0.367	0.362	0.361
125	0.574	0.569	0.571	0.873	0.87	0.866	0.565	0.561	0.565	0.774	0.745	0.75	0.393	0.379	0.38	0.39	0.383	0.385	0.367	0.364	0.362
125.5	0.575	0.569	0.572	0.872	0.867	0.868	0.566	0.561	0.564	0.774	0.744	0.75	0.391	0.379	0.38	0.39	0.384	0.385	0.366	0.362	0.362
126	0.575	0.57	0.572	0.875	0.87	0.867	0.567	0.563	0.566	0.775	0.745	0.751	0.392	0.378	0.379	0.391	0.383	0.387	0.366	0.362	0.361
126.5	0.576	0.571	0.575	0.877	0.871	0.871	0.568	0.563	0.568	0.777	0.748	0.753	0.393	0.379	0.38	0.391	0.384	0.386	0.367	0.362	0.362
127	0.576	0.572	0.575	0.877	0.872	0.872	0.568	0.564	0.567	0.777	0.748	0.755	0.393	0.379	0.38	0.39	0.383	0.386	0.367	0.362	0.361
127.5	0.577	0.571	0.575	0.878	0.873	0.871	0.569	0.565	0.57	0.779	0.749	0.756	0.392	0.379	0.379	0.39	0.383	0.385	0.366	0.361	0.361
128	0.578	0.571	0.575	0.876	0.871	0.871	0.569	0.565	0.567	0.779	0.749	0.752	0.391	0.379	0.38	0.39	0.383	0.384	0.366	0.362	0.36
128.5	0.58	0.572	0.576	0.877	0.876	0.874	0.571	0.564	0.569	0.785	0.753	0.758	0.391	0.38	0.379	0.39	0.384	0.385	0.366	0.362	0.36
129	0.579	0.574	0.579	0.879	0.877	0.872	0.571	0.567	0.572	0.786	0.755	0.759	0.393	0.381	0.38	0.39	0.385	0.387	0.367	0.362	0.362
129.5	0.58	0.574	0.579	0.88	0.876	0.879	0.573	0.568	0.571	0.788	0.757	0.761	0.392	0.38	0.38	0.39	0.385	0.385	0.366	0.362	0.362
130	0.58	0.577	0.579	0.881	0.877	0.875	0.574	0.568	0.572	0.788	0.756	0.762	0.393	0.379	0.379	0.39	0.384	0.385	0.365	0.362	0.362
130.5	0.582	0.577	0.581	0.88	0.876	0.875	0.572	0.568	0.573	0.789	0.756	0.763	0.393	0.379	0.38	0.391	0.384	0.385	0.366	0.363	0.362
131	0.583	0.58	0.582	0.884	0.881	0.879	0.575	0.57	0.574	0.79	0.761	0.765	0.392	0.381	0.38	0.391	0.385	0.386	0.367	0.362	0.362
131.5	0.585	0.578	0.583	0.884	0.881	0.881	0.575	0.572	0.574	0.793	0.76	0.766	0.393	0.38	0.381	0.391	0.385	0.387	0.366	0.363	0.363
132	0.586	0.58	0.583	0.884	0.882	0.88	0.574	0.572	0.576	0.792	0.763	0.768	0.393	0.38	0.379	0.391	0.384	0.386	0.366	0.363	0.361
132.5	0.587	0.582	0.584	0.888	0.885	0.882	0.577	0.575	0.577	0.794	0.764	0.769	0.395	0.381	0.382	0.393	0.386	0.388	0.367	0.364	0.363
133	0.584	0.578	0.582	0.883	0.881	0.879	0.576	0.573	0.575	0.795	0.763	0.769	0.394	0.38	0.381	0.392	0.385	0.386	0.366	0.362	0.36
133.5	0.589	0.583	0.585	0.887	0.884	0.883	0.578	0.575	0.578	0.799	0.766	0.775	0.393	0.381	0.381	0.392	0.385	0.386	0.367	0.363	0.362
134	0.589	0.585	0.587	0.889	0.886	0.885	0.58	0.576	0.58	0.798	0.769	0.774	0.395	0.381	0.382	0.392	0.386	0.387	0.367	0.364	0.363
134.5	0.588	0.584	0.586	0.891	0.884	0.885	0.579	0.576	0.58	0.801	0.768	0.775	0.394	0.38	0.38	0.392	0.385	0.387	0.366	0.362	0.362
135	0.589	0.585	0.587	0.887	0.885	0.885	0.58	0.578	0.581	0.8	0.77	0.776	0.394	0.38	0.38	0.392	0.384	0.388	0.367	0.362	0.36
135.5	0.589	0.584	0.586	0.887	0.887	0.882	0.582	0.576	0.58	0.801	0.771	0.773	0.393	0.38	0.38	0.391	0.384	0.386	0.366	0.362	0.362
136	0.591	0.585	0.588	0.89	0.888	0.884	0.581	0.579	0.581	0.802	0.771	0.779	0.393	0.38	0.381	0.391	0.385	0.386	0.366	0.361	0.361
136.5	0.593	0.587	0.59	0.891	0.888	0.886	0.583	0.579	0.584	0.804	0.775	0.78	0.393	0.381	0.382	0.392	0.385	0.388	0.366	0.363	0.362
137	0.595	0.588	0.592	0.892	0.891	0.889	0.582	0.582	0.586	0.807	0.776	0.784	0.395	0.382	0.383	0.393	0.387	0.388	0.367	0.364	0.363
137.5	0.595	0.588	0.594	0.895	0.889	0.889	0.586	0.581	0.586	0.809	0.776	0.784	0.396	0.382	0.382	0.393	0.387	0.388	0.368	0.364	0.363
138	0.595	0.591	0.592	0.892	0.889	0.889	0.586	0.583	0.586	0.808	0.778	0.787	0.395	0.381	0.382	0.392	0.387	0.388	0.366	0.363	0.363
138.5	0.596	0.592	0.595	0.893	0.892	0.89	0.586	0.583	0.586	0.81	0.781	0.788	0.395	0.382	0.383	0.394	0.387	0.389	0.368	0.364	0.364
139	0.598	0.592	0.595	0.893	0.892	0.89	0.586	0.584	0.588	0.811	0.783	0.788	0.395	0.382	0.383	0.394	0.386	0.389	0.366	0.363	0.362
139.5	0.598	0.594	0.596	0.892	0.894	0.89	0.587	0.585	0.587	0.815	0.783	0.79	0.395	0.382	0.382	0.394	0.388	0.388	0.368	0.364	0.363
140	0.6	0.593	0.596	0.894	0.894	0.892	0.589	0.585	0.587	0.814	0.784	0.791	0.395	0.382	0.381	0.392	0.388	0.386	0.367	0.362	0.362
140.5	0.6	0.594	0.597	0.897	0.892	0.893	0.59	0.588	0.59	0.816	0.785	0.792	0.397	0.383	0.384	0.395	0.389	0.389	0.367	0.364	0.363
141	0.599	0.594	0.597	0.895	0.893	0.89	0.589	0.585	0.588	0.815	0.783	0.79	0.395	0.382	0.383	0.393	0.388	0.387	0.367	0.363	0.363
141.5	0.602	0.596	0.598	0.896	0.895	0.892	0.591	0.588	0.591	0.819	0.789	0.794	0.396	0.381	0.384	0.394	0.388	0.388	0.366	0.362	0.362
142	0.601	0.596	0.599	0.894	0.893	0.891	0.592	0.589	0.591	0.818	0.788	0.795	0.395	0.382	0.383	0.392	0.388	0.389	0.366	0.363	0.362
142.5	0.603	0.598	0.601	0.896	0.897	0.896	0.593	0.59	0.593	0.82	0.792	0.799	0.395	0.383	0.384	0.393	0.388	0.39	0.367	0.364	0.364
143	0.604	0.599	0.601	0.897	0.896	0.895	0.594	0.59	0.594	0.822	0.791	0.799	0.394	0.382	0.384	0.394	0.387	0.389	0.366	0.364	0.363
143.5	0.604	0.599	0.603	0.896	0.897	0.894	0.595	0.591	0.594	0.824	0.791	0.798	0.396	0.383	0.384	0.394	0.388	0.389	0.367	0.364	0.363
144	0.605	0.601	0.602	0.895	0.895	0.893	0.595	0.592	0.596	0.823	0.794	0.8	0.395	0.383	0.385	0.394	0.389	0.388	0.368	0.364	0.363
144.5	0.606	0.601	0.605	0.897	0.899	0.896	0.598	0.593	0.598	0.826	0.795	0.803	0.396	0.384	0.386	0.395	0.389	0.39	0.368	0.365	0.364
145	0.605	0.601	0.603	0.896	0.896	0.892	0.596	0.592	0.596	0.825	0.795	0.8	0.395	0.382	0.384	0.393	0.388	0.388	0.366	0.362	0.361
145.5	0.607	0.601	0.606	0.898	0.897	0.895	0.597	0.594	0.597	0.827	0.799	0.803	0.396	0.383	0.385	0.394	0.388	0.389	0.366	0.364	0.362
146	0.608	0.604	0.605	0.897	0.895	0.895	0.598	0.595	0.599	0.828	0.797	0.806	0.396	0.382	0.386	0.395	0.389	0.389	0.367	0.364	0.362
146.5	0.611	0.606	0.608	0.9	0.9	0.899	0.602	0.595	0.603	0.831	0.804	0.81	0.398	0.384	0.388	0.396	0.392	0.392	0.37	0.365	0.365
147	0.611	0.605	0.608	0.897	0.898	0.897	0.6	0.597	0.601	0.829	0.8	0.807	0.395	0.383	0.385	0.395	0.388	0.39	0.368	0.363	0.362
147.5	0.611	0.605	0.609	0.899	0.899	0.898	0.601	0.597	0.601	0.83	0.801	0.808	0.396	0.384	0.387	0.394	0.39	0.39	0.367	0.365	0.363
148	0.612	0.606	0.609	0.897	0.899	0.896	0.6	0.597	0.601	0.831	0.803	0.808	0.396	0.383	0.386	0.395	0.388	0.389	0.367	0.362	0.361
148.5	0.613	0.607	0.61	0.897	0.9	0.898	0.602	0.599	0.601	0.833	0.803	0.811	0.395	0.384	0.387	0.395	0.389	0.389	0.367	0.364	0.362
149	0.614	0.609	0.611	0.902	0.904	0.899	0.604	0.6	0.605	0.835	0.806	0.816	0.398	0.385	0.387	0.395	0.391	0.391	0.367	0.365	0.362
149.5	0.615	0.61	0.613	0.898	0.901	0.898	0.604	0.6	0.605	0.837	0.809	0.814	0.397	0.384	0.389	0.395	0.39	0.39	0.369	0.364	0.363

## Sheet: Fit_data
Slope to be fit on first 60 minutes, absorbance at 360nm per 0.05uM of protein
Time (min)	CII	CII	CII	CII+DNA	CII+DNA	CII+DNA	CII+M	CII+M	CII+M	CII+M+DNA	CII+M+DNA	CII+M+DNA	CIIQ+M	CIIQ+M	CIIQ+M	CIIQ+M+DNA	CIIQ+M+DNA	CIIQ+M+DNA	Buffer	Buffer	Buffer
0	0.368	0.365	0.366	0.373	0.369	0.363	0.365	0.36	0.356	0.371	0.361	0.365	0.364	0.348	0.353	0.362	0.354	0.355	0.357	0.351	0.352
0.5	0.372	0.366	0.368	0.377	0.371	0.367	0.367	0.362	0.359	0.375	0.364	0.369	0.364	0.351	0.355	0.364	0.354	0.356	0.357	0.35	0.351
1	0.372	0.367	0.37	0.378	0.375	0.369	0.368	0.364	0.361	0.376	0.366	0.368	0.365	0.352	0.354	0.362	0.354	0.356	0.357	0.351	0.352
1.5	0.373	0.369	0.37	0.38	0.377	0.372	0.369	0.366	0.361	0.377	0.368	0.37	0.364	0.351	0.354	0.361	0.355	0.355	0.357	0.36	0.352
2	0.374	0.369	0.37	0.383	0.377	0.373	0.371	0.364	0.36	0.378	0.369	0.372	0.364	0.349	0.353	0.362	0.355	0.355	0.357	0.373	0.352
2.5	0.376	0.371	0.373	0.383	0.381	0.375	0.371	0.366	0.362	0.381	0.372	0.374	0.364	0.351	0.353	0.364	0.356	0.356	0.358	0.352	0.352
3	0.376	0.371	0.373	0.387	0.384	0.378	0.373	0.367	0.364	0.382	0.373	0.374	0.365	0.351	0.353	0.362	0.354	0.356	0.356	0.351	0.352
3.5	0.378	0.373	0.373	0.389	0.387	0.38	0.372	0.369	0.364	0.384	0.375	0.378	0.365	0.351	0.355	0.363	0.354	0.357	0.357	0.351	0.352
4	0.378	0.373	0.375	0.392	0.389	0.383	0.374	0.369	0.365	0.386	0.376	0.379	0.365	0.35	0.355	0.364	0.355	0.356	0.357	0.352	0.353
4.5	0.38	0.374	0.377	0.393	0.391	0.385	0.375	0.369	0.366	0.388	0.378	0.38	0.365	0.35	0.355	0.364	0.355	0.357	0.357	0.352	0.352
5	0.38	0.375	0.376	0.396	0.392	0.387	0.376	0.37	0.367	0.39	0.381	0.382	0.367	0.351	0.354	0.362	0.354	0.356	0.357	0.351	0.353
5.5	0.379	0.373	0.376	0.396	0.395	0.388	0.375	0.369	0.365	0.391	0.379	0.382	0.364	0.35	0.352	0.362	0.354	0.357	0.357	0.351	0.351
6	0.381	0.377	0.379	0.398	0.397	0.392	0.376	0.37	0.369	0.392	0.382	0.384	0.365	0.351	0.353	0.362	0.354	0.357	0.358	0.353	0.351
6.5	0.383	0.378	0.38	0.403	0.4	0.394	0.379	0.373	0.369	0.395	0.384	0.387	0.365	0.352	0.356	0.364	0.355	0.357	0.358	0.352	0.353
7	0.384	0.379	0.381	0.404	0.404	0.397	0.379	0.375	0.371	0.397	0.386	0.389	0.366	0.352	0.356	0.364	0.356	0.359	0.357	0.352	0.353
7.5	0.383	0.378	0.38	0.405	0.403	0.398	0.38	0.375	0.37	0.396	0.388	0.389	0.366	0.351	0.354	0.364	0.354	0.357	0.357	0.352	0.352
8	0.385	0.379	0.383	0.409	0.406	0.401	0.381	0.376	0.372	0.399	0.389	0.391	0.365	0.353	0.355	0.363	0.356	0.358	0.358	0.352	0.353
8.5	0.386	0.381	0.384	0.411	0.409	0.404	0.382	0.376	0.373	0.402	0.391	0.394	0.366	0.352	0.357	0.364	0.356	0.358	0.358	0.352	0.353
9	0.388	0.381	0.383	0.412	0.41	0.404	0.382	0.377	0.373	0.402	0.392	0.395	0.367	0.353	0.354	0.364	0.356	0.358	0.356	0.353	0.352
9.5	0.387	0.382	0.383	0.414	0.412	0.408	0.383	0.379	0.374	0.404	0.393	0.397	0.365	0.352	0.356	0.364	0.356	0.358	0.357	0.351	0.353
10	0.389	0.384	0.386	0.417	0.415	0.41	0.386	0.38	0.374	0.407	0.394	0.399	0.366	0.352	0.356	0.364	0.357	0.358	0.357	0.353	0.353
10.5	0.39	0.383	0.384	0.417	0.417	0.412	0.385	0.379	0.375	0.406	0.396	0.399	0.367	0.351	0.355	0.363	0.356	0.358	0.357	0.352	0.352
11	0.39	0.385	0.387	0.42	0.42	0.415	0.385	0.38	0.375	0.409	0.398	0.4	0.367	0.352	0.357	0.365	0.355	0.359	0.357	0.353	0.353
11.5	0.392	0.385	0.387	0.424	0.42	0.417	0.386	0.382	0.376	0.412	0.4	0.403	0.366	0.353	0.356	0.363	0.357	0.358	0.358	0.353	0.352
12	0.392	0.386	0.389	0.426	0.424	0.419	0.388	0.383	0.379	0.413	0.402	0.405	0.367	0.353	0.357	0.366	0.357	0.36	0.359	0.354	0.354
12.5	0.394	0.388	0.391	0.43	0.426	0.421	0.388	0.384	0.379	0.413	0.404	0.407	0.368	0.353	0.356	0.365	0.357	0.36	0.359	0.354	0.354
13	0.393	0.388	0.39	0.43	0.427	0.423	0.389	0.383	0.379	0.416	0.405	0.408	0.367	0.352	0.356	0.364	0.356	0.359	0.357	0.351	0.353
13.5	0.395	0.388	0.392	0.433	0.431	0.425	0.39	0.385	0.381	0.419	0.407	0.409	0.367	0.354	0.357	0.366	0.358	0.359	0.358	0.354	0.353
14	0.395	0.39	0.392	0.434	0.431	0.427	0.39	0.385	0.381	0.419	0.408	0.411	0.366	0.353	0.357	0.366	0.358	0.36	0.357	0.358	0.353
14.5	0.397	0.389	0.394	0.438	0.435	0.43	0.393	0.387	0.384	0.421	0.41	0.413	0.367	0.354	0.356	0.365	0.359	0.36	0.359	0.368	0.353
15	0.397	0.392	0.394	0.438	0.438	0.432	0.393	0.387	0.383	0.424	0.412	0.415	0.367	0.354	0.358	0.366	0.358	0.358	0.359	0.375	0.352
15.5	0.399	0.393	0.395	0.441	0.44	0.435	0.394	0.388	0.385	0.425	0.414	0.416	0.369	0.354	0.357	0.366	0.359	0.361	0.359	0.371	0.353
16	0.399	0.392	0.395	0.443	0.442	0.435	0.394	0.388	0.384	0.427	0.414	0.416	0.367	0.354	0.357	0.365	0.358	0.359	0.358	0.363	0.353
16.5	0.4	0.393	0.396	0.444	0.443	0.438	0.396	0.39	0.386	0.426	0.416	0.419	0.367	0.353	0.358	0.366	0.358	0.36	0.358	0.354	0.354
17	0.399	0.394	0.397	0.447	0.445	0.44	0.395	0.39	0.387	0.431	0.417	0.42	0.367	0.354	0.357	0.365	0.357	0.359	0.356	0.353	0.352
17.5	0.401	0.394	0.398	0.449	0.447	0.442	0.396	0.391	0.389	0.429	0.419	0.421	0.366	0.353	0.357	0.366	0.359	0.36	0.357	0.352	0.354
18	0.402	0.395	0.399	0.451	0.45	0.443	0.397	0.391	0.389	0.433	0.42	0.424	0.367	0.354	0.356	0.365	0.359	0.361	0.358	0.355	0.353
18.5	0.402	0.397	0.4	0.454	0.452	0.447	0.398	0.392	0.39	0.435	0.422	0.426	0.368	0.354	0.357	0.366	0.358	0.361	0.358	0.362	0.354
19	0.403	0.398	0.401	0.456	0.455	0.448	0.399	0.394	0.39	0.436	0.424	0.426	0.368	0.355	0.357	0.367	0.359	0.36	0.359	0.369	0.354
19.5	0.405	0.399	0.401	0.458	0.458	0.451	0.4	0.393	0.391	0.438	0.426	0.428	0.369	0.355	0.357	0.366	0.358	0.362	0.359	0.377	0.354
20	0.405	0.399	0.402	0.46	0.46	0.453	0.4	0.396	0.392	0.439	0.427	0.43	0.368	0.355	0.357	0.366	0.36	0.361	0.358	0.378	0.354
20.5	0.406	0.4	0.403	0.462	0.463	0.455	0.403	0.395	0.392	0.441	0.429	0.432	0.369	0.355	0.357	0.366	0.358	0.361	0.359	0.376	0.353
21	0.406	0.4	0.404	0.465	0.463	0.457	0.401	0.397	0.394	0.443	0.43	0.433	0.369	0.355	0.358	0.366	0.358	0.361	0.359	0.37	0.353
21.5	0.407	0.402	0.405	0.468	0.466	0.46	0.402	0.398	0.395	0.444	0.431	0.434	0.371	0.355	0.358	0.368	0.36	0.361	0.359	0.359	0.353
22	0.406	0.402	0.405	0.469	0.466	0.462	0.404	0.399	0.395	0.446	0.432	0.435	0.369	0.355	0.356	0.367	0.359	0.361	0.36	0.353	0.353
22.5	0.41	0.404	0.407	0.471	0.47	0.464	0.405	0.399	0.396	0.447	0.435	0.437	0.368	0.355	0.359	0.367	0.361	0.362	0.359	0.354	0.353
23	0.41	0.406	0.408	0.473	0.473	0.466	0.406	0.402	0.398	0.45	0.437	0.438	0.369	0.356	0.359	0.367	0.361	0.362	0.359	0.354	0.355
23.5	0.41	0.403	0.408	0.476	0.474	0.468	0.406	0.4	0.397	0.451	0.437	0.44	0.369	0.355	0.359	0.366	0.36	0.361	0.359	0.354	0.354
24	0.411	0.405	0.408	0.478	0.476	0.471	0.407	0.402	0.399	0.452	0.44	0.441	0.369	0.355	0.358	0.367	0.36	0.362	0.359	0.354	0.353
24.5	0.412	0.407	0.411	0.481	0.479	0.472	0.408	0.403	0.4	0.454	0.441	0.442	0.37	0.356	0.358	0.366	0.36	0.362	0.359	0.353	0.353
25	0.413	0.407	0.41	0.482	0.482	0.474	0.408	0.404	0.401	0.457	0.443	0.445	0.37	0.355	0.359	0.367	0.361	0.361	0.359	0.354	0.354
25.5	0.413	0.408	0.412	0.484	0.483	0.477	0.409	0.404	0.402	0.457	0.442	0.446	0.37	0.355	0.359	0.368	0.36	0.362	0.36	0.353	0.352
26	0.415	0.408	0.413	0.485	0.485	0.48	0.41	0.405	0.402	0.459	0.444	0.447	0.37	0.355	0.359	0.368	0.361	0.363	0.36	0.353	0.353
26.5	0.415	0.41	0.411	0.488	0.487	0.48	0.411	0.405	0.403	0.46	0.447	0.446	0.37	0.355	0.358	0.368	0.359	0.362	0.359	0.354	0.352
27	0.417	0.411	0.414	0.491	0.491	0.483	0.411	0.407	0.405	0.462	0.449	0.449	0.37	0.357	0.36	0.367	0.36	0.362	0.359	0.354	0.353
27.5	0.418	0.412	0.415	0.493	0.492	0.485	0.412	0.407	0.406	0.463	0.45	0.451	0.371	0.356	0.36	0.368	0.36	0.362	0.359	0.355	0.354
28	0.417	0.412	0.415	0.495	0.493	0.489	0.413	0.408	0.406	0.464	0.451	0.453	0.37	0.355	0.359	0.367	0.361	0.363	0.36	0.354	0.353
28.5	0.418	0.413	0.416	0.497	0.496	0.492	0.414	0.409	0.405	0.468	0.453	0.454	0.371	0.357	0.36	0.367	0.361	0.362	0.359	0.354	0.354
29	0.419	0.415	0.416	0.499	0.499	0.493	0.415	0.41	0.408	0.469	0.456	0.457	0.37	0.356	0.36	0.368	0.362	0.363	0.359	0.355	0.352
29.5	0.42	0.413	0.416	0.501	0.5	0.494	0.416	0.411	0.408	0.471	0.456	0.455	0.371	0.358	0.359	0.369	0.362	0.363	0.36	0.354	0.353
30	0.421	0.415	0.417	0.503	0.503	0.496	0.415	0.41	0.41	0.473	0.456	0.46	0.369	0.355	0.359	0.368	0.36	0.362	0.359	0.354	0.353
30.5	0.422	0.416	0.417	0.506	0.505	0.499	0.415	0.412	0.409	0.474	0.459	0.459	0.37	0.356	0.359	0.368	0.361	0.364	0.359	0.354	0.354
31	0.422	0.416	0.418	0.507	0.507	0.499	0.416	0.413	0.411	0.475	0.46	0.461	0.37	0.356	0.358	0.367	0.361	0.364	0.358	0.354	0.353
31.5	0.424	0.418	0.42	0.511	0.51	0.503	0.418	0.415	0.413	0.478	0.462	0.463	0.371	0.357	0.361	0.369	0.362	0.364	0.359	0.356	0.354
32	0.423	0.417	0.42	0.512	0.513	0.505	0.42	0.415	0.413	0.479	0.465	0.465	0.372	0.357	0.359	0.368	0.362	0.364	0.359	0.355	0.354
32.5	0.425	0.42	0.422	0.514	0.515	0.508	0.42	0.415	0.414	0.483	0.466	0.467	0.373	0.356	0.36	0.368	0.362	0.364	0.359	0.355	0.354
33	0.426	0.421	0.422	0.517	0.516	0.51	0.422	0.417	0.415	0.482	0.467	0.469	0.371	0.358	0.361	0.368	0.363	0.365	0.36	0.355	0.355
33.5	0.427	0.42	0.423	0.519	0.519	0.513	0.422	0.417	0.415	0.486	0.469	0.47	0.372	0.357	0.361	0.369	0.362	0.364	0.359	0.355	0.353
34	0.428	0.42	0.423	0.521	0.52	0.513	0.423	0.417	0.416	0.485	0.471	0.471	0.372	0.356	0.359	0.369	0.362	0.364	0.359	0.356	0.352
34.5	0.428	0.421	0.423	0.521	0.522	0.515	0.422	0.418	0.416	0.486	0.47	0.472	0.371	0.357	0.358	0.368	0.361	0.363	0.357	0.354	0.353
35	0.429	0.422	0.425	0.525	0.525	0.517	0.425	0.419	0.418	0.489	0.474	0.474	0.372	0.358	0.36	0.369	0.363	0.365	0.36	0.356	0.354
35.5	0.43	0.425	0.427	0.526	0.527	0.52	0.424	0.421	0.419	0.491	0.475	0.477	0.373	0.358	0.361	0.369	0.363	0.363	0.36	0.359	0.355
36	0.431	0.424	0.426	0.529	0.53	0.523	0.427	0.42	0.42	0.492	0.476	0.477	0.371	0.359	0.359	0.369	0.362	0.365	0.359	0.362	0.354
36.5	0.432	0.426	0.429	0.532	0.534	0.526	0.425	0.422	0.421	0.495	0.478	0.479	0.373	0.358	0.362	0.37	0.363	0.365	0.36	0.367	0.355
37	0.431	0.427	0.429	0.534	0.535	0.528	0.428	0.422	0.421	0.495	0.479	0.481	0.372	0.357	0.362	0.369	0.362	0.366	0.358	0.371	0.355
37.5	0.434	0.427	0.429	0.536	0.537	0.53	0.429	0.422	0.422	0.495	0.48	0.481	0.373	0.357	0.361	0.37	0.363	0.365	0.36	0.375	0.355
38	0.435	0.428	0.429	0.538	0.538	0.532	0.429	0.424	0.424	0.499	0.482	0.484	0.372	0.358	0.36	0.37	0.364	0.365	0.359	0.375	0.355
38.5	0.435	0.427	0.431	0.539	0.538	0.533	0.43	0.424	0.423	0.499	0.482	0.486	0.373	0.357	0.361	0.369	0.363	0.365	0.361	0.375	0.354
39	0.435	0.43	0.432	0.542	0.541	0.535	0.43	0.424	0.424	0.5	0.484	0.486	0.372	0.358	0.36	0.37	0.362	0.363	0.359	0.371	0.354
39.5	0.437	0.431	0.432	0.544	0.545	0.539	0.431	0.425	0.424	0.501	0.485	0.488	0.374	0.359	0.361	0.371	0.363	0.366	0.36	0.366	0.355
40	0.437	0.43	0.432	0.545	0.544	0.54	0.432	0.425	0.425	0.501	0.487	0.489	0.373	0.359	0.36	0.371	0.361	0.366	0.36	0.36	0.354
40.5	0.438	0.432	0.433	0.548	0.546	0.543	0.433	0.426	0.427	0.503	0.488	0.491	0.373	0.359	0.362	0.371	0.364	0.365	0.361	0.357	0.354
41	0.438	0.432	0.435	0.551	0.548	0.544	0.433	0.427	0.427	0.504	0.49	0.492	0.373	0.359	0.362	0.368	0.363	0.365	0.36	0.355	0.355
41.5	0.44	0.435	0.436	0.553	0.55	0.547	0.434	0.429	0.428	0.507	0.491	0.494	0.374	0.359	0.362	0.37	0.363	0.365	0.361	0.355	0.355
42	0.44	0.434	0.436	0.554	0.552	0.548	0.435	0.43	0.427	0.508	0.491	0.497	0.373	0.358	0.361	0.37	0.363	0.365	0.36	0.354	0.354
42.5	0.441	0.434	0.437	0.557	0.553	0.549	0.436	0.429	0.429	0.51	0.493	0.496	0.373	0.359	0.361	0.369	0.362	0.366	0.359	0.354	0.354
43	0.441	0.435	0.438	0.559	0.555	0.553	0.435	0.431	0.43	0.513	0.494	0.499	0.373	0.359	0.361	0.369	0.365	0.365	0.359	0.355	0.355
43.5	0.443	0.436	0.439	0.563	0.558	0.555	0.437	0.432	0.431	0.514	0.497	0.501	0.374	0.359	0.363	0.37	0.366	0.366	0.36	0.357	0.355
44	0.444	0.438	0.44	0.565	0.56	0.557	0.438	0.433	0.432	0.514	0.498	0.501	0.373	0.361	0.363	0.371	0.364	0.365	0.361	0.355	0.355
44.5	0.444	0.438	0.441	0.566	0.562	0.559	0.438	0.433	0.432	0.517	0.499	0.504	0.374	0.359	0.362	0.37	0.364	0.367	0.36	0.354	0.354
45	0.446	0.438	0.44	0.568	0.564	0.561	0.44	0.434	0.434	0.518	0.501	0.506	0.372	0.361	0.362	0.37	0.364	0.366	0.359	0.355	0.355
45.5	0.446	0.44	0.444	0.57	0.566	0.565	0.439	0.435	0.435	0.52	0.502	0.506	0.375	0.36	0.364	0.371	0.365	0.367	0.361	0.356	0.356
46	0.448	0.44	0.444	0.571	0.569	0.566	0.441	0.436	0.436	0.522	0.505	0.508	0.374	0.362	0.363	0.371	0.366	0.368	0.361	0.356	0.355
46.5	0.448	0.439	0.444	0.572	0.57	0.568	0.441	0.436	0.435	0.522	0.504	0.508	0.374	0.361	0.362	0.37	0.364	0.367	0.36	0.355	0.355
47	0.447	0.442	0.445	0.576	0.573	0.571	0.441	0.437	0.437	0.526	0.507	0.512	0.375	0.362	0.363	0.372	0.366	0.367	0.361	0.356	0.357
47.5	0.45	0.442	0.447	0.577	0.575	0.574	0.442	0.439	0.439	0.527	0.508	0.514	0.375	0.361	0.363	0.371	0.365	0.368	0.361	0.357	0.356
48	0.449	0.442	0.447	0.579	0.576	0.574	0.444	0.44	0.438	0.529	0.51	0.515	0.376	0.361	0.363	0.371	0.365	0.367	0.361	0.356	0.355
48.5	0.451	0.445	0.448	0.581	0.579	0.576	0.445	0.44	0.441	0.53	0.511	0.515	0.376	0.36	0.363	0.37	0.366	0.367	0.362	0.356	0.355
49	0.45	0.446	0.449	0.583	0.582	0.58	0.445	0.442	0.441	0.532	0.513	0.518	0.375	0.363	0.363	0.372	0.365	0.367	0.361	0.355	0.356
49.5	0.453	0.445	0.45	0.586	0.583	0.584	0.447	0.443	0.443	0.534	0.514	0.521	0.376	0.361	0.365	0.373	0.365	0.368	0.36	0.357	0.357
50	0.452	0.446	0.451	0.588	0.585	0.584	0.447	0.443	0.442	0.536	0.515	0.521	0.376	0.362	0.364	0.372	0.366	0.368	0.362	0.356	0.357
50.5	0.453	0.447	0.452	0.591	0.588	0.586	0.448	0.443	0.443	0.537	0.517	0.522	0.376	0.361	0.362	0.371	0.366	0.368	0.361	0.357	0.356
51	0.455	0.447	0.453	0.592	0.59	0.587	0.448	0.444	0.444	0.537	0.518	0.524	0.376	0.363	0.364	0.372	0.366	0.368	0.362	0.356	0.357
51.5	0.454	0.447	0.453	0.596	0.592	0.59	0.45	0.445	0.446	0.54	0.519	0.525	0.376	0.362	0.363	0.373	0.367	0.368	0.362	0.356	0.357
52	0.455	0.448	0.454	0.598	0.593	0.593	0.45	0.446	0.446	0.542	0.521	0.527	0.376	0.363	0.365	0.372	0.366	0.369	0.362	0.356	0.357
52.5	0.455	0.45	0.454	0.599	0.595	0.593	0.452	0.446	0.446	0.542	0.522	0.528	0.376	0.362	0.364	0.372	0.367	0.368	0.362	0.356	0.355
53	0.457	0.45	0.454	0.601	0.598	0.596	0.452	0.446	0.446	0.545	0.526	0.529	0.376	0.364	0.363	0.372	0.367	0.368	0.362	0.357	0.356
53.5	0.457	0.452	0.456	0.605	0.601	0.599	0.453	0.447	0.448	0.544	0.526	0.532	0.376	0.363	0.365	0.373	0.367	0.369	0.362	0.357	0.357
54	0.456	0.451	0.456	0.605	0.6	0.599	0.452	0.447	0.447	0.546	0.527	0.531	0.376	0.362	0.363	0.371	0.366	0.369	0.361	0.355	0.355
54.5	0.459	0.452	0.457	0.609	0.604	0.603	0.453	0.448	0.448	0.548	0.529	0.533	0.376	0.361	0.364	0.372	0.367	0.368	0.361	0.357	0.357
55	0.458	0.453	0.458	0.608	0.606	0.606	0.454	0.45	0.45	0.549	0.531	0.536	0.376	0.363	0.364	0.372	0.366	0.368	0.361	0.357	0.357
55.5	0.461	0.454	0.46	0.611	0.608	0.606	0.454	0.452	0.45	0.55	0.533	0.537	0.376	0.362	0.365	0.372	0.367	0.369	0.361	0.356	0.356
56	0.461	0.455	0.457	0.613	0.61	0.609	0.457	0.452	0.452	0.555	0.534	0.539	0.377	0.363	0.365	0.373	0.368	0.368	0.362	0.355	0.358
56.5	0.461	0.456	0.46	0.617	0.612	0.611	0.457	0.453	0.452	0.556	0.535	0.538	0.377	0.363	0.364	0.373	0.367	0.369	0.361	0.357	0.356
57	0.462	0.457	0.461	0.619	0.615	0.612	0.457	0.453	0.453	0.557	0.536	0.541	0.378	0.363	0.365	0.373	0.368	0.369	0.361	0.356	0.357
57.5	0.464	0.456	0.461	0.621	0.617	0.617	0.459	0.455	0.454	0.56	0.539	0.544	0.378	0.363	0.366	0.373	0.37	0.369	0.362	0.357	0.358
58	0.464	0.458	0.463	0.623	0.62	0.618	0.459	0.455	0.456	0.561	0.54	0.545	0.378	0.364	0.367	0.375	0.369	0.37	0.363	0.358	0.357
58.5	0.466	0.46	0.464	0.627	0.622	0.62	0.461	0.456	0.456	0.563	0.542	0.547	0.378	0.365	0.365	0.375	0.37	0.37	0.363	0.357	0.359
59	0.466	0.46	0.464	0.627	0.623	0.621	0.461	0.456	0.456	0.565	0.544	0.547	0.377	0.364	0.365	0.375	0.369	0.369	0.362	0.357	0.357
59.5	0.466	0.461	0.465	0.629	0.624	0.624	0.461	0.457	0.456	0.565	0.544	0.549	0.377	0.364	0.365	0.374	0.368	0.37	0.361	0.357	0.356
60	0.468	0.462	0.467	0.633	0.629	0.628	0.463	0.46	0.459	0.568	0.547	0.551	0.379	0.364	0.367	0.374	0.369	0.371	0.363	0.359	0.359

## Sheet: Absorbance corrected
Absorbance converted to phosphate concentration, units ATP uM per 0.05uM protein
Time (min)	CII	CII	CII	CII+DNA	CII+DNA	CII+DNA	CII+M	CII+M	CII+M	CII+M+DNA	CII+M+DNA	CII+M+DNA	CIIQ+M	CIIQ+M	CIIQ+M	CIIQ+M+DNA	CIIQ+M+DNA	CIIQ+M+DNA	Buffer	Buffer	Buffer
0	2.99017	2.38812	2.5888	3.99358	3.19085	1.98675	2.38812	1.38471	0.581979	3.59221	1.58539	2.38812	2.18744	-1.02348	-0.0200682	1.78607	0.180614	0.381296	0.782661	-0.421433	-0.220751
0.5	3.7929	2.5888	2.99017	4.79631	3.59221	2.78948	2.78948	1.78607	1.18403	4.39494	2.18744	3.19085	2.18744	-0.421433	0.381296	2.18744	0.180614	0.581979	0.782661	-0.622115	-0.421433
1	3.7929	2.78948	3.39153	4.99699	4.39494	3.19085	2.99017	2.18744	1.58539	4.59563	2.5888	2.99017	2.38812	-0.220751	0.180614	1.78607	0.180614	0.581979	0.782661	-0.421433	-0.220751
1.5	3.99358	3.19085	3.39153	5.39835	4.79631	3.7929	3.19085	2.5888	1.58539	4.79631	2.99017	3.39153	2.18744	-0.421433	0.180614	1.58539	0.381296	0.381296	0.782661	1.38471	-0.220751
2	4.19426	3.19085	3.39153	6.0004	4.79631	3.99358	3.59221	2.18744	1.38471	4.99699	3.19085	3.7929	2.18744	-0.822797	-0.0200682	1.78607	0.381296	0.381296	0.782661	3.99358	-0.220751
2.5	4.59563	3.59221	3.99358	6.0004	5.59904	4.39494	3.59221	2.5888	1.78607	5.59904	3.7929	4.19426	2.18744	-0.421433	-0.0200682	2.18744	0.581979	0.581979	0.983343	-0.220751	-0.220751
3	4.59563	3.59221	3.99358	6.80313	6.20108	4.99699	3.99358	2.78948	2.18744	5.79972	3.99358	4.19426	2.38812	-0.421433	-0.0200682	1.78607	0.180614	0.581979	0.581979	-0.421433	-0.220751
3.5	4.99699	3.99358	3.99358	7.2045	6.80313	5.39835	3.7929	3.19085	2.18744	6.20108	4.39494	4.99699	2.38812	-0.421433	0.381296	1.98675	0.180614	0.782661	0.782661	-0.421433	-0.220751
4	4.99699	3.99358	4.39494	7.80654	7.2045	6.0004	4.19426	3.19085	2.38812	6.60245	4.59563	5.19767	2.38812	-0.622115	0.381296	2.18744	0.381296	0.581979	0.782661	-0.220751	-0.0200682
4.5	5.39835	4.19426	4.79631	8.00722	7.60586	6.40177	4.39494	3.19085	2.5888	7.00381	4.99699	5.39835	2.38812	-0.622115	0.381296	2.18744	0.381296	0.782661	0.782661	-0.220751	-0.220751
5	5.39835	4.39494	4.59563	8.60927	7.80654	6.80313	4.59563	3.39153	2.78948	7.40518	5.59904	5.79972	2.78948	-0.421433	0.180614	1.78607	0.180614	0.581979	0.782661	-0.421433	-0.0200682
5.5	5.19767	3.99358	4.59563	8.60927	8.40859	7.00381	4.39494	3.19085	2.38812	7.60586	5.19767	5.79972	2.18744	-0.622115	-0.220751	1.78607	0.180614	0.782661	0.782661	-0.421433	-0.421433
6	5.59904	4.79631	5.19767	9.01064	8.80995	7.80654	4.59563	3.39153	3.19085	7.80654	5.79972	6.20108	2.38812	-0.421433	-0.0200682	1.78607	0.180614	0.782661	0.983343	-0.0200682	-0.421433
6.5	6.0004	4.99699	5.39835	10.014	9.412	8.20791	5.19767	3.99358	3.19085	8.40859	6.20108	6.80313	2.38812	-0.220751	0.581979	2.18744	0.381296	0.782661	0.983343	-0.220751	-0.0200682
7	6.20108	5.19767	5.59904	10.2147	10.2147	8.80995	5.19767	4.39494	3.59221	8.80995	6.60245	7.2045	2.5888	-0.220751	0.581979	2.18744	0.581979	1.18403	0.782661	-0.220751	-0.0200682
7.5	6.0004	4.99699	5.39835	10.4154	10.014	9.01064	5.39835	4.39494	3.39153	8.60927	7.00381	7.2045	2.5888	-0.421433	0.180614	2.18744	0.180614	0.782661	0.782661	-0.220751	-0.220751
8	6.40177	5.19767	6.0004	11.2181	10.6161	9.61268	5.59904	4.59563	3.7929	9.21132	7.2045	7.60586	2.38812	-0.0200682	0.381296	1.98675	0.581979	0.983343	0.983343	-0.220751	-0.0200682
8.5	6.60245	5.59904	6.20108	11.6195	11.2181	10.2147	5.79972	4.59563	3.99358	9.81337	7.60586	8.20791	2.5888	-0.220751	0.782661	2.18744	0.581979	0.983343	0.983343	-0.220751	-0.0200682
9	7.00381	5.59904	6.0004	11.8202	11.4188	10.2147	5.79972	4.79631	3.99358	9.81337	7.80654	8.40859	2.78948	-0.0200682	0.180614	2.18744	0.581979	0.983343	0.581979	-0.0200682	-0.220751
9.5	6.80313	5.79972	6.0004	12.2216	11.8202	11.0175	6.0004	5.19767	4.19426	10.2147	8.00722	8.80995	2.38812	-0.220751	0.581979	2.18744	0.581979	0.983343	0.782661	-0.421433	-0.0200682
10	7.2045	6.20108	6.60245	12.8236	12.4222	11.4188	6.60245	5.39835	4.19426	10.8168	8.20791	9.21132	2.5888	-0.220751	0.581979	2.18744	0.782661	0.983343	0.782661	-0.0200682	-0.0200682
10.5	7.40518	6.0004	6.20108	12.8236	12.8236	11.8202	6.40177	5.19767	4.39494	10.6161	8.60927	9.21132	2.78948	-0.421433	0.381296	1.98675	0.581979	0.983343	0.782661	-0.220751	-0.220751
11	7.40518	6.40177	6.80313	13.4256	13.4256	12.4222	6.40177	5.39835	4.39494	11.2181	9.01064	9.412	2.78948	-0.220751	0.782661	2.38812	0.381296	1.18403	0.782661	-0.0200682	-0.0200682
11.5	7.80654	6.40177	6.80313	14.2284	13.4256	12.8236	6.60245	5.79972	4.59563	11.8202	9.412	10.014	2.5888	-0.0200682	0.581979	1.98675	0.782661	0.983343	0.983343	-0.0200682	-0.220751
12	7.80654	6.60245	7.2045	14.6297	14.2284	13.225	7.00381	6.0004	5.19767	12.0209	9.81337	10.4154	2.78948	-0.0200682	0.782661	2.5888	0.782661	1.38471	1.18403	0.180614	0.180614
12.5	8.20791	7.00381	7.60586	15.4325	14.6297	13.6263	7.00381	6.20108	5.19767	12.0209	10.2147	10.8168	2.99017	-0.0200682	0.581979	2.38812	0.782661	1.38471	1.18403	0.180614	0.180614
13	8.00722	7.00381	7.40518	15.4325	14.8304	14.0277	7.2045	6.0004	5.19767	12.6229	10.4154	11.0175	2.78948	-0.220751	0.581979	2.18744	0.581979	1.18403	0.782661	-0.421433	-0.0200682
13.5	8.40859	7.00381	7.80654	16.0345	15.6332	14.4291	7.40518	6.40177	5.59904	13.225	10.8168	11.2181	2.78948	0.180614	0.782661	2.5888	0.983343	1.18403	0.983343	0.180614	-0.0200682
14	8.40859	7.40518	7.80654	16.2352	15.6332	14.8304	7.40518	6.40177	5.59904	13.225	11.0175	11.6195	2.5888	-0.0200682	0.782661	2.5888	0.983343	1.38471	0.782661	0.983343	-0.0200682
14.5	8.80995	7.2045	8.20791	17.0379	16.4359	15.4325	8.00722	6.80313	6.20108	13.6263	11.4188	12.0209	2.78948	0.180614	0.581979	2.38812	1.18403	1.38471	1.18403	2.99017	-0.0200682
15	8.80995	7.80654	8.20791	17.0379	17.0379	15.8338	8.00722	6.80313	6.0004	14.2284	11.8202	12.4222	2.78948	0.180614	0.983343	2.5888	0.983343	0.983343	1.18403	4.39494	-0.220751
15.5	9.21132	8.00722	8.40859	17.64	17.4393	16.4359	8.20791	7.00381	6.40177	14.4291	12.2216	12.6229	3.19085	0.180614	0.782661	2.5888	1.18403	1.58539	1.18403	3.59221	-0.0200682
16	9.21132	7.80654	8.40859	18.0413	17.8407	16.4359	8.20791	7.00381	6.20108	14.8304	12.2216	12.6229	2.78948	0.180614	0.782661	2.38812	0.983343	1.18403	0.983343	1.98675	-0.0200682
16.5	9.412	8.00722	8.60927	18.242	18.0413	17.0379	8.60927	7.40518	6.60245	14.6297	12.6229	13.225	2.78948	-0.0200682	0.983343	2.5888	0.983343	1.38471	0.983343	0.180614	0.180614
17	9.21132	8.20791	8.80995	18.8441	18.4427	17.4393	8.40859	7.40518	6.80313	15.6332	12.8236	13.4256	2.78948	0.180614	0.782661	2.38812	0.782661	1.18403	0.581979	-0.0200682	-0.220751
17.5	9.61268	8.20791	9.01064	19.2454	18.8441	17.8407	8.60927	7.60586	7.2045	15.2318	13.225	13.6263	2.5888	-0.0200682	0.782661	2.5888	1.18403	1.38471	0.782661	-0.220751	0.180614
18	9.81337	8.40859	9.21132	19.6468	19.4461	18.0413	8.80995	7.60586	7.2045	16.0345	13.4256	14.2284	2.78948	0.180614	0.581979	2.38812	1.18403	1.58539	0.983343	0.381296	-0.0200682
18.5	9.81337	8.80995	9.412	20.2488	19.8475	18.8441	9.01064	7.80654	7.40518	16.4359	13.827	14.6297	2.99017	0.180614	0.782661	2.5888	0.983343	1.58539	0.983343	1.78607	0.180614
19	10.014	9.01064	9.61268	20.6502	20.4495	19.0448	9.21132	8.20791	7.40518	16.6366	14.2284	14.6297	2.99017	0.381296	0.782661	2.78948	1.18403	1.38471	1.18403	3.19085	0.180614
19.5	10.4154	9.21132	9.61268	21.0516	21.0516	19.6468	9.412	8.00722	7.60586	17.0379	14.6297	15.0311	3.19085	0.381296	0.782661	2.5888	0.983343	1.78607	1.18403	4.79631	0.180614
20	10.4154	9.21132	9.81337	21.4529	21.4529	20.0482	9.412	8.60927	7.80654	17.2386	14.8304	15.4325	2.99017	0.381296	0.782661	2.5888	1.38471	1.58539	0.983343	4.99699	0.180614
20.5	10.6161	9.412	10.014	21.8543	22.055	20.4495	10.014	8.40859	7.80654	17.64	15.2318	15.8338	3.19085	0.381296	0.782661	2.5888	0.983343	1.58539	1.18403	4.59563	-0.0200682
21	10.6161	9.412	10.2147	22.4564	22.055	20.8509	9.61268	8.80995	8.20791	18.0413	15.4325	16.0345	3.19085	0.381296	0.983343	2.5888	0.983343	1.58539	1.18403	3.39153	-0.0200682
21.5	10.8168	9.81337	10.4154	23.0584	22.657	21.4529	9.81337	9.01064	8.40859	18.242	15.6332	16.2352	3.59221	0.381296	0.983343	2.99017	1.38471	1.58539	1.18403	1.18403	-0.0200682
22	10.6161	9.81337	10.4154	23.2591	22.657	21.8543	10.2147	9.21132	8.40859	18.6434	15.8338	16.4359	3.19085	0.381296	0.581979	2.78948	1.18403	1.58539	1.38471	-0.0200682	-0.0200682
22.5	11.4188	10.2147	10.8168	23.6604	23.4598	22.2557	10.4154	9.21132	8.60927	18.8441	16.4359	16.8372	2.99017	0.381296	1.18403	2.78948	1.58539	1.78607	1.18403	0.180614	-0.0200682
23	11.4188	10.6161	11.0175	24.0618	24.0618	22.657	10.6161	9.81337	9.01064	19.4461	16.8372	17.0379	3.19085	0.581979	1.18403	2.78948	1.58539	1.78607	1.18403	0.180614	0.381296
23.5	11.4188	10.014	11.0175	24.6639	24.2625	23.0584	10.6161	9.412	8.80995	19.6468	16.8372	17.4393	3.19085	0.381296	1.18403	2.5888	1.38471	1.58539	1.18403	0.180614	0.180614
24	11.6195	10.4154	11.0175	25.0652	24.6639	23.6604	10.8168	9.81337	9.21132	19.8475	17.4393	17.64	3.19085	0.381296	0.983343	2.78948	1.38471	1.78607	1.18403	0.180614	-0.0200682
24.5	11.8202	10.8168	11.6195	25.6673	25.2659	23.8611	11.0175	10.014	9.412	20.2488	17.64	17.8407	3.39153	0.581979	0.983343	2.5888	1.38471	1.78607	1.18403	-0.0200682	-0.0200682
25	12.0209	10.8168	11.4188	25.868	25.868	24.2625	11.0175	10.2147	9.61268	20.8509	18.0413	18.4427	3.39153	0.381296	1.18403	2.78948	1.58539	1.58539	1.18403	0.180614	0.180614
25.5	12.0209	11.0175	11.8202	26.2693	26.0686	24.8645	11.2181	10.2147	9.81337	20.8509	17.8407	18.6434	3.39153	0.381296	1.18403	2.99017	1.38471	1.78607	1.38471	-0.0200682	-0.220751
26	12.4222	11.0175	12.0209	26.47	26.47	25.4666	11.4188	10.4154	9.81337	21.2523	18.242	18.8441	3.39153	0.381296	1.18403	2.99017	1.58539	1.98675	1.38471	-0.0200682	-0.0200682
26.5	12.4222	11.4188	11.6195	27.072	26.8714	25.4666	11.6195	10.4154	10.014	21.4529	18.8441	18.6434	3.39153	0.381296	0.983343	2.99017	1.18403	1.78607	1.18403	0.180614	-0.220751
27	12.8236	11.6195	12.2216	27.6741	27.6741	26.0686	11.6195	10.8168	10.4154	21.8543	19.2454	19.2454	3.39153	0.782661	1.38471	2.78948	1.38471	1.78607	1.18403	0.180614	-0.0200682
27.5	13.0243	11.8202	12.4222	28.0755	27.8748	26.47	11.8202	10.8168	10.6161	22.055	19.4461	19.6468	3.59221	0.581979	1.38471	2.99017	1.38471	1.78607	1.18403	0.381296	0.180614
28	12.8236	11.8202	12.4222	28.4768	28.0755	27.2727	12.0209	11.0175	10.6161	22.2557	19.6468	20.0482	3.39153	0.381296	1.18403	2.78948	1.58539	1.98675	1.38471	0.180614	-0.0200682
28.5	13.0243	12.0209	12.6229	28.8782	28.6775	27.8748	12.2216	11.2181	10.4154	23.0584	20.0482	20.2488	3.59221	0.782661	1.38471	2.78948	1.58539	1.78607	1.18403	0.180614	0.180614
29	13.225	12.4222	12.6229	29.2796	29.2796	28.0755	12.4222	11.4188	11.0175	23.2591	20.6502	20.8509	3.39153	0.581979	1.38471	2.99017	1.78607	1.98675	1.18403	0.381296	-0.220751
29.5	13.4256	12.0209	12.6229	29.6809	29.4802	28.2761	12.6229	11.6195	11.0175	23.6604	20.6502	20.4495	3.59221	0.983343	1.18403	3.19085	1.78607	1.98675	1.38471	0.180614	-0.0200682
30	13.6263	12.4222	12.8236	30.0823	30.0823	28.6775	12.4222	11.4188	11.4188	24.0618	20.6502	21.4529	3.19085	0.381296	1.18403	2.99017	1.38471	1.78607	1.18403	0.180614	-0.0200682
30.5	13.827	12.6229	12.8236	30.6843	30.4836	29.2796	12.4222	11.8202	11.2181	24.2625	21.2523	21.2523	3.39153	0.581979	1.18403	2.99017	1.58539	2.18744	1.18403	0.180614	0.180614
31	13.827	12.6229	13.0243	30.885	30.885	29.2796	12.6229	12.0209	11.6195	24.4632	21.4529	21.6536	3.39153	0.581979	0.983343	2.78948	1.58539	2.18744	0.983343	0.180614	-0.0200682
31.5	14.2284	13.0243	13.4256	31.6877	31.4871	30.0823	13.0243	12.4222	12.0209	25.0652	21.8543	22.055	3.59221	0.782661	1.58539	3.19085	1.78607	2.18744	1.18403	0.581979	0.180614
32	14.0277	12.8236	13.4256	31.8884	32.0891	30.4836	13.4256	12.4222	12.0209	25.2659	22.4564	22.4564	3.7929	0.782661	1.18403	2.99017	1.78607	2.18744	1.18403	0.381296	0.180614
32.5	14.4291	13.4256	13.827	32.2898	32.4905	31.0857	13.4256	12.4222	12.2216	26.0686	22.657	22.8577	3.99358	0.581979	1.38471	2.99017	1.78607	2.18744	1.18403	0.381296	0.180614
33	14.6297	13.6263	13.827	32.8918	32.6911	31.4871	13.827	12.8236	12.4222	25.868	22.8577	23.2591	3.59221	0.983343	1.58539	2.99017	1.98675	2.38812	1.38471	0.381296	0.381296
33.5	14.8304	13.4256	14.0277	33.2932	33.2932	32.0891	13.827	12.8236	12.4222	26.6707	23.2591	23.4598	3.7929	0.782661	1.58539	3.19085	1.78607	2.18744	1.18403	0.381296	-0.0200682
34	15.0311	13.4256	14.0277	33.6946	33.4939	32.0891	14.0277	12.8236	12.6229	26.47	23.6604	23.6604	3.7929	0.581979	1.18403	3.19085	1.78607	2.18744	1.18403	0.581979	-0.220751
34.5	15.0311	13.6263	14.0277	33.6946	33.8952	32.4905	13.827	13.0243	12.6229	26.6707	23.4598	23.8611	3.59221	0.782661	0.983343	2.99017	1.58539	1.98675	0.782661	0.180614	-0.0200682
35	15.2318	13.827	14.4291	34.4973	34.4973	32.8918	14.4291	13.225	13.0243	27.2727	24.2625	24.2625	3.7929	0.983343	1.38471	3.19085	1.98675	2.38812	1.38471	0.581979	0.180614
35.5	15.4325	14.4291	14.8304	34.698	34.8987	33.4939	14.2284	13.6263	13.225	27.6741	24.4632	24.8645	3.99358	0.983343	1.58539	3.19085	1.98675	1.98675	1.38471	1.18403	0.381296
36	15.6332	14.2284	14.6297	35.3	35.5007	34.0959	14.8304	13.4256	13.4256	27.8748	24.6639	24.8645	3.59221	1.18403	1.18403	3.19085	1.78607	2.38812	1.18403	1.78607	0.180614
36.5	15.8338	14.6297	15.2318	35.9021	36.3034	34.698	14.4291	13.827	13.6263	28.4768	25.0652	25.2659	3.99358	0.983343	1.78607	3.39153	1.98675	2.38812	1.38471	2.78948	0.381296
37	15.6332	14.8304	15.2318	36.3034	36.5041	35.0993	15.0311	13.827	13.6263	28.4768	25.2659	25.6673	3.7929	0.782661	1.78607	3.19085	1.78607	2.5888	0.983343	3.59221	0.381296
37.5	16.2352	14.8304	15.2318	36.7048	36.9055	35.5007	15.2318	13.827	13.827	28.4768	25.4666	25.6673	3.99358	0.782661	1.58539	3.39153	1.98675	2.38812	1.38471	4.39494	0.381296
38	16.4359	15.0311	15.2318	37.1062	37.1062	35.9021	15.2318	14.2284	14.2284	29.2796	25.868	26.2693	3.7929	0.983343	1.38471	3.39153	2.18744	2.38812	1.18403	4.39494	0.381296
38.5	16.4359	14.8304	15.6332	37.3068	37.1062	36.1027	15.4325	14.2284	14.0277	29.2796	25.868	26.6707	3.99358	0.782661	1.58539	3.19085	1.98675	2.38812	1.58539	4.39494	0.180614
39	16.4359	15.4325	15.8338	37.9089	37.7082	36.5041	15.4325	14.2284	14.2284	29.4802	26.2693	26.6707	3.7929	0.983343	1.38471	3.39153	1.78607	1.98675	1.18403	3.59221	0.180614
39.5	16.8372	15.6332	15.8338	38.3103	38.5109	37.3068	15.6332	14.4291	14.2284	29.6809	26.47	27.072	4.19426	1.18403	1.58539	3.59221	1.98675	2.5888	1.38471	2.5888	0.381296
40	16.8372	15.4325	15.8338	38.5109	38.3103	37.5075	15.8338	14.4291	14.4291	29.6809	26.8714	27.2727	3.99358	1.18403	1.38471	3.59221	1.58539	2.5888	1.38471	1.38471	0.180614
40.5	17.0379	15.8338	16.0345	39.113	38.7116	38.1096	16.0345	14.6297	14.8304	30.0823	27.072	27.6741	3.99358	1.18403	1.78607	3.59221	2.18744	2.38812	1.58539	0.782661	0.180614
41	17.0379	15.8338	16.4359	39.715	39.113	38.3103	16.0345	14.8304	14.8304	30.283	27.4734	27.8748	3.99358	1.18403	1.78607	2.99017	1.98675	2.38812	1.38471	0.381296	0.381296
41.5	17.4393	16.4359	16.6366	40.1164	39.5143	38.9123	16.2352	15.2318	15.0311	30.885	27.6741	28.2761	4.19426	1.18403	1.78607	3.39153	1.98675	2.38812	1.58539	0.381296	0.381296
42	17.4393	16.2352	16.6366	40.3171	39.9157	39.113	16.4359	15.4325	14.8304	31.0857	27.6741	28.8782	3.99358	0.983343	1.58539	3.39153	1.98675	2.38812	1.38471	0.180614	0.180614
42.5	17.64	16.2352	16.8372	40.9191	40.1164	39.3137	16.6366	15.2318	15.2318	31.4871	28.0755	28.6775	3.99358	1.18403	1.58539	3.19085	1.78607	2.5888	1.18403	0.180614	0.180614
43	17.64	16.4359	17.0379	41.3205	40.5178	40.1164	16.4359	15.6332	15.4325	32.0891	28.2761	29.2796	3.99358	1.18403	1.58539	3.19085	2.38812	2.38812	1.18403	0.381296	0.381296
43.5	18.0413	16.6366	17.2386	42.1232	41.1198	40.5178	16.8372	15.8338	15.6332	32.2898	28.8782	29.6809	4.19426	1.18403	1.98675	3.39153	2.5888	2.5888	1.38471	0.782661	0.381296
44	18.242	17.0379	17.4393	42.5246	41.5212	40.9191	17.0379	16.0345	15.8338	32.2898	29.0789	29.6809	3.99358	1.58539	1.98675	3.59221	2.18744	2.38812	1.58539	0.381296	0.381296
44.5	18.242	17.0379	17.64	42.7253	41.9225	41.3205	17.0379	16.0345	15.8338	32.8918	29.2796	30.283	4.19426	1.18403	1.78607	3.39153	2.18744	2.78948	1.38471	0.180614	0.180614
45	18.6434	17.0379	17.4393	43.1266	42.3239	41.7219	17.4393	16.2352	16.2352	33.0925	29.6809	30.6843	3.7929	1.58539	1.78607	3.39153	2.18744	2.5888	1.18403	0.381296	0.381296
45.5	18.6434	17.4393	18.242	43.528	42.7253	42.5246	17.2386	16.4359	16.4359	33.4939	29.8816	30.6843	4.39494	1.38471	2.18744	3.59221	2.38812	2.78948	1.58539	0.581979	0.581979
46	19.0448	17.4393	18.242	43.7287	43.3273	42.7253	17.64	16.6366	16.6366	33.8952	30.4836	31.0857	4.19426	1.78607	1.98675	3.59221	2.5888	2.99017	1.58539	0.581979	0.381296
46.5	19.0448	17.2386	18.242	43.9294	43.528	43.1266	17.64	16.6366	16.4359	33.8952	30.283	31.0857	4.19426	1.58539	1.78607	3.39153	2.18744	2.78948	1.38471	0.381296	0.381296
47	18.8441	17.8407	18.4427	44.7321	44.13	43.7287	17.64	16.8372	16.8372	34.698	30.885	31.8884	4.39494	1.78607	1.98675	3.7929	2.5888	2.78948	1.58539	0.581979	0.782661
47.5	19.4461	17.8407	18.8441	44.9328	44.5314	44.3307	17.8407	17.2386	17.2386	34.8987	31.0857	32.2898	4.39494	1.58539	1.98675	3.59221	2.38812	2.99017	1.58539	0.782661	0.581979
48	19.2454	17.8407	18.8441	45.3341	44.7321	44.3307	18.242	17.4393	17.0379	35.3	31.4871	32.4905	4.59563	1.58539	1.98675	3.59221	2.38812	2.78948	1.58539	0.581979	0.381296
48.5	19.6468	18.4427	19.0448	45.7355	45.3341	44.7321	18.4427	17.4393	17.64	35.5007	31.6877	32.4905	4.59563	1.38471	1.98675	3.39153	2.5888	2.78948	1.78607	0.581979	0.381296
49	19.4461	18.6434	19.2454	46.1369	45.9362	45.5348	18.4427	17.8407	17.64	35.9021	32.0891	33.0925	4.39494	1.98675	1.98675	3.7929	2.38812	2.78948	1.58539	0.381296	0.581979
49.5	20.0482	18.4427	19.4461	46.7389	46.1369	46.3375	18.8441	18.0413	18.0413	36.3034	32.2898	33.6946	4.59563	1.58539	2.38812	3.99358	2.38812	2.99017	1.38471	0.782661	0.782661
50	19.8475	18.6434	19.6468	47.1403	46.5382	46.3375	18.8441	18.0413	17.8407	36.7048	32.4905	33.6946	4.59563	1.78607	2.18744	3.7929	2.5888	2.99017	1.78607	0.581979	0.782661
50.5	20.0482	18.8441	19.8475	47.7423	47.1403	46.7389	19.0448	18.0413	18.0413	36.9055	32.8918	33.8952	4.59563	1.58539	1.78607	3.59221	2.5888	2.99017	1.58539	0.782661	0.581979
51	20.4495	18.8441	20.0482	47.943	47.5416	46.9396	19.0448	18.242	18.242	36.9055	33.0925	34.2966	4.59563	1.98675	2.18744	3.7929	2.5888	2.99017	1.78607	0.581979	0.782661
51.5	20.2488	18.8441	20.0482	48.7457	47.943	47.5416	19.4461	18.4427	18.6434	37.5075	33.2932	34.4973	4.59563	1.78607	1.98675	3.99358	2.78948	2.99017	1.78607	0.581979	0.782661
52	20.4495	19.0448	20.2488	49.1471	48.1437	48.1437	19.4461	18.6434	18.6434	37.9089	33.6946	34.8987	4.59563	1.98675	2.38812	3.7929	2.5888	3.19085	1.78607	0.581979	0.782661
52.5	20.4495	19.4461	20.2488	49.3478	48.5451	48.1437	19.8475	18.6434	18.6434	37.9089	33.8952	35.0993	4.59563	1.78607	2.18744	3.7929	2.78948	2.99017	1.78607	0.581979	0.381296
53	20.8509	19.4461	20.2488	49.7491	49.1471	48.7457	19.8475	18.6434	18.6434	38.5109	34.698	35.3	4.59563	2.18744	1.98675	3.7929	2.78948	2.99017	1.78607	0.782661	0.581979
53.5	20.8509	19.8475	20.6502	50.5519	49.7491	49.3478	20.0482	18.8441	19.0448	38.3103	34.698	35.9021	4.59563	1.98675	2.38812	3.99358	2.78948	3.19085	1.78607	0.782661	0.782661
54	20.6502	19.6468	20.6502	50.5519	49.5485	49.3478	19.8475	18.8441	18.8441	38.7116	34.8987	35.7014	4.59563	1.78607	1.98675	3.59221	2.5888	3.19085	1.58539	0.381296	0.381296
54.5	21.2523	19.8475	20.8509	51.3546	50.3512	50.1505	20.0482	19.0448	19.0448	39.113	35.3	36.1027	4.59563	1.58539	2.18744	3.7929	2.78948	2.99017	1.58539	0.782661	0.782661
55	21.0516	20.0482	21.0516	51.1539	50.7526	50.7526	20.2488	19.4461	19.4461	39.3137	35.7014	36.7048	4.59563	1.98675	2.18744	3.7929	2.5888	2.99017	1.58539	0.782661	0.782661
55.5	21.6536	20.2488	21.4529	51.756	51.1539	50.7526	20.2488	19.8475	19.4461	39.5143	36.1027	36.9055	4.59563	1.78607	2.38812	3.7929	2.78948	3.19085	1.58539	0.581979	0.581979
56	21.6536	20.4495	20.8509	52.1573	51.5553	51.3546	20.8509	19.8475	19.8475	40.5178	36.3034	37.3068	4.79631	1.98675	2.38812	3.99358	2.99017	2.99017	1.78607	0.381296	0.983343
56.5	21.6536	20.6502	21.4529	52.9601	51.9567	51.756	20.8509	20.0482	19.8475	40.7184	36.5041	37.1062	4.79631	1.98675	2.18744	3.99358	2.78948	3.19085	1.58539	0.782661	0.581979
57	21.8543	20.8509	21.6536	53.3614	52.5587	51.9567	20.8509	20.0482	20.0482	40.9191	36.7048	37.7082	4.99699	1.98675	2.38812	3.99358	2.99017	3.19085	1.58539	0.581979	0.782661
57.5	22.2557	20.6502	21.6536	53.7628	52.9601	52.9601	21.2523	20.4495	20.2488	41.5212	37.3068	38.3103	4.99699	1.98675	2.5888	3.99358	3.39153	3.19085	1.78607	0.782661	0.983343
58	22.2557	21.0516	22.055	54.1642	53.5621	53.1607	21.2523	20.4495	20.6502	41.7219	37.5075	38.5109	4.99699	2.18744	2.78948	4.39494	3.19085	3.39153	1.98675	0.983343	0.782661
58.5	22.657	21.4529	22.2557	54.9669	53.9635	53.5621	21.6536	20.6502	20.6502	42.1232	37.9089	38.9123	4.99699	2.38812	2.38812	4.39494	3.39153	3.39153	1.98675	0.782661	1.18403
59	22.657	21.4529	22.2557	54.9669	54.1642	53.7628	21.6536	20.6502	20.6502	42.5246	38.3103	38.9123	4.79631	2.18744	2.38812	4.39494	3.19085	3.19085	1.78607	0.782661	0.782661
59.5	22.657	21.6536	22.4564	55.3683	54.3648	54.3648	21.6536	20.8509	20.6502	42.5246	38.3103	39.3137	4.79631	2.18744	2.38812	4.19426	2.99017	3.39153	1.58539	0.782661	0.581979
60	23.0584	21.8543	22.8577	56.171	55.3683	55.1676	22.055	21.4529	21.2523	43.1266	38.9123	39.715	5.19767	2.18744	2.78948	4.19426	3.19085	3.59221	1.98675	1.18403	1.18403

## Sheet: Sheet3
	CII	CII	CII	CII+DNA	CII+DNA	CII+DNA	CII+M	CII+M	CII+M	CII+M+DNA	CII+M+DNA	CII+M+DNA	CIIQ+M	CIIQ+M	CIIQ+M	CIIQ+M+DNA	CIIQ+M+DNA	CIIQ+M+DNA	Buffer	Buffer	Buffer
Slope	0.3213	0.3173	0.3253	0.8618	0.8575	0.8737	0.3169	0.3197	0.3363	0.6471	0.6068	0.6151	0.04642	0.04667	0.03988	0.03815	0.04863	0.04761	0.01735	0.00804	0.01738
Y-intercept	3.893	2.825	3.18	4.227	3.954	2.544	3.049	1.965	1.058	4.223	2.473	2.822	2.158	-0.6673	0.08537	1.842	0.158	0.5552	0.7233	0.5746	-0.3175
X-intercept	-12.12	-8.903	-9.775	-4.905	-4.611	-2.912	-9.622	-6.146	-3.146	-6.526	-4.076	-4.588	-46.49	14.3	-2.141	-48.29	-3.249	-11.66	-41.7	-71.47	18.27
1/slope	3.112	3.152	3.074	1.16	1.166	1.145	3.155	3.128	2.973	1.545	1.648	1.626	21.54	21.43	25.07	26.21	20.56	21	57.65	124.4	57.55
R squared	0.9985	0.9988	0.9986	0.9998	0.9994	0.9998	0.9988	0.9988	0.999	0.9994	0.9993	0.9996	0.968	0.9585	0.9355	0.9445	0.9606	0.9724	0.794	0.01164	0.747
Rate per 1uM protein, per minute	6.426	6.346	6.506	17.236	17.15	17.474	6.338	6.394	6.726	12.942	12.136	12.302	0.9284	0.9334	0.7976	0.763	0.9726	0.9522	0.347	0.1608	0.3476
