# Supplementary material for: MCPH1 inhibits Condensin II during interphase by regulating its SMC2-Kleisin interface
Source: eLife. 2021 Dec 1;10:e73348. doi: 10.7554/eLife.73348 (PMC8673838; doi:10.7554/eLife.73348)
Supplement: Figure 8—source data 1. [file elife-73348-fig8-data1.xlsx]

## Sheet: Sheet1
mRNA Injected	Oocyte number	GFP value
Ncaph2-GFP	K-1.czi_GFP.txt	0.710409
	K-2.czi_GFP.txt	0.703617
	K-3.czi_GFP.txt	0.439934
	K-4.czi_GFP.txt	0.394398
	K-5.czi_GFP.txt	0.62751
	K-6.czi_GFP.txt	0.407286
	K-7.czi_GFP.txt	0.846891
	K-8.czi_GFP.txt	0.619639
	K-9.czi_GFP.txt	0.662338
	K-10.czi_GFP.txt	0.386949
	K-11.czi_GFP.txt	1.08478
Ncaph2-GFP + MCPH1	KMU-1.czi_GFP.txt	0.348855
	KMU-10.czi_GFP.txt	0.300196
	KMU-11.czi_GFP.txt	0.260197
	KMU-12.czi_GFP.txt	0.316516
	KMU-13.czi_GFP.txt	0.237223
	KMU-14.czi_GFP.txt	0.353693
	KMU-2.czi_GFP.txt	0.461289
	KMU-3.czi_GFP.txt	0.285419
	KMU-4.czi_GFP.txt	0.275587
	KMU-5.czi_GFP.txt	0.331736
	KMU-6.czi_GFP.txt	0.246022
	KMU-7.czi_GFP.txt	0.303091
	KMU-8.czi_GFP.txt	0.288501
	KMU-9.czi_GFP.txt	0.375332
	KMU-15.czi_GFP.txt	0.38901
	KMU-16.czi_GFP.txt	0.225757
	KMU-17.czi_GFP.txt	0.2849
	KMU-18.czi_GFP.txt	0.232155
