# Supplementary material for: MCPH1 inhibits Condensin II during interphase by regulating its SMC2-Kleisin interface
Source: eLife. 2021 Dec 1;10:e73348. doi: 10.7554/eLife.73348 (PMC8673838; doi:10.7554/eLife.73348)
Supplement: Figure 9—source data 1. [file elife-73348-fig9-data1.xlsx]

## Sheet: Sheet1
mRNA Injected	Oocyte number	GFP value
Fusion-GFP	F-1.czi_GFP.txt	0.420834
	F-2.czi_GFP.txt	0.448127
	F-3.czi_GFP.txt	0.164828
	F-4.czi_GFP.txt	0.755495
	F-5.czi_GFP.txt	0.17279
	F-6.czi_GFP.txt	0.410832
	F-7.czi_GFP.txt	0.499548
	F-8.czi_GFP.txt	0.487474
	F-9.czi_GFP.txt	0.651278
Fusion-GFP + MCPH1	FMU-1.czi_GFP.txt	0.369588
	FMU-10.czi_GFP.txt	0.786042
	FMU-11.czi_GFP.txt	0.259185
	FMU-12.czi_GFP.txt	0.782162
	FMU-13.czi_GFP.txt	0.415256
	FMU-14.czi_GFP.txt	0.723377
	FMU-2.czi_GFP.txt	0.72205
	FMU-3.czi_GFP.txt	0.235617
	FMU-4.czi_GFP.txt	0.409533
	FMU-5.czi_GFP.txt	0.627192
	FMU-6.czi_GFP.txt	0.494507
	FMU-7.czi_GFP.txt	0.289749
	FMU-8.czi_GFP.txt	0.361748
	FMU-9.czi_GFP.txt	0.690906
Fusion-GFP + TEV	FT-1.czi_GFP.txt	0.251529
	FT-10.czi_GFP.txt	0.566778
	FT-11.czi_GFP.txt	0.174979
	FT-12.czi_GFP.txt	0.499003
	FT-13.czi_GFP.txt	0.399867
	FT-2.czi_GFP.txt	0.17908
	FT-3.czi_GFP.txt	0.484811
	FT-4.czi_GFP.txt	0.197834
	FT-5.czi_GFP.txt	0.346184
	FT-6.czi_GFP.txt	0.267848
	FT-7.czi_GFP.txt	0.47312
	FT-8.czi_GFP.txt	0.206685
	FT-9.czi_GFP.txt	0.623299
Fusion-GFP + TEV + MCPH1	FTMU-1.czi_GFP.txt	0.0180445
	FTMU-10.czi_GFP.txt	0.154026
	FTMU-11.czi_GFP.txt	0.0710969
	FTMU-12.czi_GFP.txt	0.111713
	FTMU-13.czi_GFP.txt	0.220838
	FTMU-14.czi_GFP.txt	0.0719003
	FTMU-15.czi_GFP.txt	0.0977635
	FTMU-16.czi_GFP.txt	0.0607213
	FTMU-17.czi_GFP.txt	0.086166
	FTMU-18.czi_GFP.txt	0.196849
	FTMU-2.czi_GFP.txt	0.0453295
	FTMU-3.czi_GFP.txt	0.124885
	FTMU-4.czi_GFP.txt	0.188735
	FTMU-5.czi_GFP.txt	0.0554787
	FTMU-6.czi_GFP.txt	0.0980656
	FTMU-7.czi_GFP.txt	0.178983
	FTMU-8.czi_GFP.txt	0.0888972
	FTMU-9.czi_GFP.txt	0.201276
