# Supplementary material for: MCPH1 inhibits Condensin II during interphase by regulating its SMC2-Kleisin interface
Source: eLife. 2021 Dec 1;10:e73348. doi: 10.7554/eLife.73348 (PMC8673838; doi:10.7554/eLife.73348)
Supplement: Figure 10—figure supplement 2—source data 1. [file elife-73348-fig10-figsupp2-data1.xlsx]

## Sheet: Sheet1
Cell1
	Scc1 Red	Ncaph2 Green			Scc1 Red	Ncaph2 Green			Scc1 Red	Ncaph2 Green
a				b				c
0	59	0	41.8333	0	49	0	41.8333	0	49.879	0	61
0.092252	58.2	0.092252	46.0278	0.092252	55.2625	0.092252	46.0278	0.092252	57.756	0.092252	71.125
0.184504	62.4611	0.184504	35.8	0.184504	74.4	0.184504	35.8	0.184504	74.4	0.184504	58.575
0.276755	89.3389	0.276755	35.0167	0.276755	98.2	0.276755	35.0167	0.276755	70.65	0.276755	49.8125
0.369007	128.875	0.369007	38.2	0.369007	124.25	0.369007	38.2	0.369007	120.764	0.369007	55.4
0.461259	142.889	0.461259	45.6667	0.461259	134.125	0.461259	45.6667	0.461259	140.635	0.461259	48.2812
0.553511	137.436	0.553511	31.35	0.553511	114	0.553511	31.35	0.553511	120.63	0.553511	47.5875
0.645762	100.579	0.645762	38.0333	0.645762	87.5625	0.645762	38.0333	0.645762	90.36	0.645762	54.7062
0.738014	98.28	0.738014	42.6667	0.738014	65.1	0.738014	42.6667	0.738014	70.142	0.738014	64.4
0.830266	82.2978	0.830266	44.7833	0.830266	49.75	0.830266	44.7833	0.830266	60.291	0.830266	86.3625
0.922518	77.8611	0.922518	50.5556	0.922518	38	0.922518	50.5556	0.922518	50.327	0.922518	73.9375
Cell2
	Scc1 Red	Ncaph2 Green			Scc1 Red	Ncaph2 Green			Scc1 Red	Ncaph2 Green
a				b				c
0	34.4167	0	28.8333	0	36	0	11.8333	0	23.25	0	15.5833
0.092252	44.4133	0.092252	17.7489	0.092252	46.0611	0.092252	19.07	0.092252	31.2	0.092252	21.7333
0.184504	54.8733	0.184504	11.3833	0.184504	67.0167	0.184504	24.85	0.184504	45.4833	0.184504	26.1167
0.276755	68.44	0.276755	14.9667	0.276755	94.83	0.276755	13.42	0.276755	62.5333	0.276755	16.95
0.369007	89.5667	0.369007	23.3789	0.369007	120.192	0.369007	23.5356	0.369007	95.0833	0.369007	20.7222
0.461259	123	0.461259	24.3333	0.461259	159.917	0.461259	41.3333	0.461259	114.833	0.461259	23.6667
0.553511	120	0.553511	23.7333	0.553511	118.84	0.553511	29.1533	0.553511	113.833	0.553511	11.3167
0.645762	80.4778	0.645762	15.5867	0.645762	89.3078	0.645762	24.4789	0.645762	95.7889	0.645762	24.3056
0.738014	61.3433	0.738014	21.8767	0.738014	74.34	0.738014	21.7	0.738014	79.0333	0.738014	23.5833
0.830266	42.0467	0.830266	24.5933	0.830266	65.3767	0.830266	14.1967	0.830266	42.55	0.830266	19.0833
0.922518	40.6111	0.922518	25.6944	0.922518	59.1944	0.922518	14.4444	0.922518	36.8611	0.922518	25.9444
Cell3
	Scc1 Red	Ncaph2 Green			Scc1 Red	Ncaph2 Green			Scc1 Red	Ncaph2 Green
a				b				c
0	58.4375	0	34.25	0	52.25	0	29.5	0	20.5	0	0
0.092252	67.575	0.092252	32.0625	0.092252	58.7375	0.092252	27.2025	0.092252	29.4325	0.092252	11.8737
0.184504	114.825	0.184504	30.075	0.184504	63.255	0.184504	57.725	0.184504	42.1425	0.184504	33.2175
0.276755	131.463	0.276755	54.675	0.276755	78.0581	0.276755	69.6844	0.276755	57.6113	0.276755	27.6513
0.369007	150.225	0.369007	107.312	0.369007	85.29	0.369007	84.16	0.369007	102.04	0.369007	41.49
0.461259	132.312	0.461259	123.125	0.461259	122.641	0.461259	120.031	0.461259	137.031	0.461259	86.5938
0.553511	115.175	0.553511	89.1	0.553511	110.84	0.553511	106.94	0.553511	102.228	0.553511	66.1325
0.645762	98.1375	0.645762	36.85	0.645762	94.5612	0.645762	75.985	0.645762	64.5663	0.645762	42.4813
0.738014	51.9375	0.738014	24.45	0.738014	85.405	0.738014	51.955	0.738014	28.29	0.738014	32.56
0.830266	36.75	0.830266	18.4375	0.830266	60.1494	0.830266	32.3613	0.830266	19.4538	0.830266	26.4487
0.922518	30.8125	0.922518	27.6875	0.922518	42	0.922518	34.5	0.922518	19.875	0.922518	11.75
Cell4
	Scc1 Red	Ncaph2 Green			Scc1 Red	Ncaph2 Green			Scc1 Red	Ncaph2 Green
a				b				c
0	19.5	0	16.8333	0	35.6667	0	14.8889	0	25.3333	0	12.4167
0.09225	27.9148	0.09225	29.8	0.09225	34.1544	0.09225	34.6227	0.09225	38.9204	0.09225	14.8333
0.1845	40.9389	0.1845	56.6185	0.1845	55.6344	0.1845	130.906	0.1845	62.9926	0.1845	34.8685
0.27676	42.6222	0.27676	60.6167	0.27676	77.15	0.27676	167.53	0.27676	65.9167	0.27676	87.0889
0.36901	71.2722	0.36901	119.33	0.36901	71.5565	0.36901	167.684	0.36901	75.2111	0.36901	121.848
0.46126	51.037	0.46126	90.1389	0.46126	86.1173	0.46126	151.583	0.46126	98.6852	0.46126	85.4167
0.55351	78.3056	0.55351	73.5222	0.55351	95.9433	0.55351	116.292	0.55351	118.094	0.55351	78.3444
0.64576	88.8519	0.64576	48.8407	0.64576	119.575	0.64576	74.3291	0.64576	118.213	0.64576	48.4519
0.73801	90.6537	0.73801	47.6611	0.73801	115.1	0.73801	84.9846	0.73801	113.704	0.73801	61.0648
0.83027	87.95	0.83027	69.9667	0.83027	95.3011	0.83027	121.6	0.83027	93.3833	0.83027	59.3667
0.92252	80.3241	0.92252	97.4259	0.92252	79.1821	0.92252	128.577	0.92252	82.3889	0.92252	67.8241
1.01477	55.1944	1.01477	115.478	1.01477	72.8344	1.01477	164.315	1.01477	79.4222	1.01477	90.0074
1.10702	53.5111	1.10702	155.217	1.10702	54.21	1.10702	158.04	1.10702	64.1222	1.10702	93.1056
1.19927	41.5463	1.19927	123.437	1.19927	43.561	1.19927	171.909	1.19927	45.2667	1.19927	117.452
1.29152	32.3093	1.29152	45.2741	1.29152	36.1106	1.29152	128.338	1.29152	53	1.29152	74.637
1.38378	38.6111	1.38378	15.5278	1.38378	34.0556	1.38378	97.0556	1.38378	40.0833	1.38378	43.7222
