# Supplementary figures and images for: MCPH1 inhibits Condensin II during interphase by regulating its SMC2-Kleisin interface
Source: eLife journal article supplement (doi:10.7554/elife.73348), 2021-12-01

Figure 1 A - Source data 1

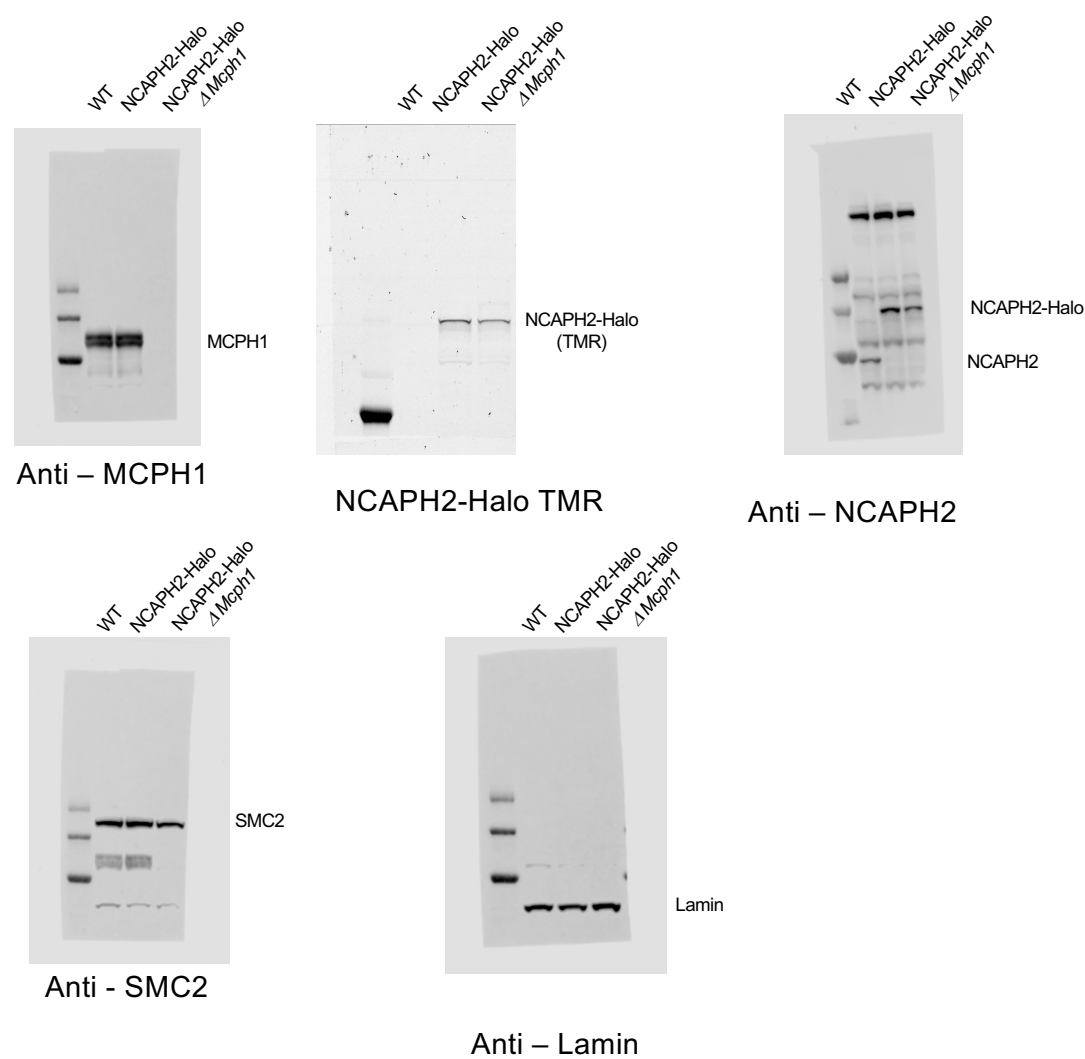

Supplement: fig1-data1 [file elife-73348-fig1-data1-v2.zip]

Figure 1 D - Source data 1

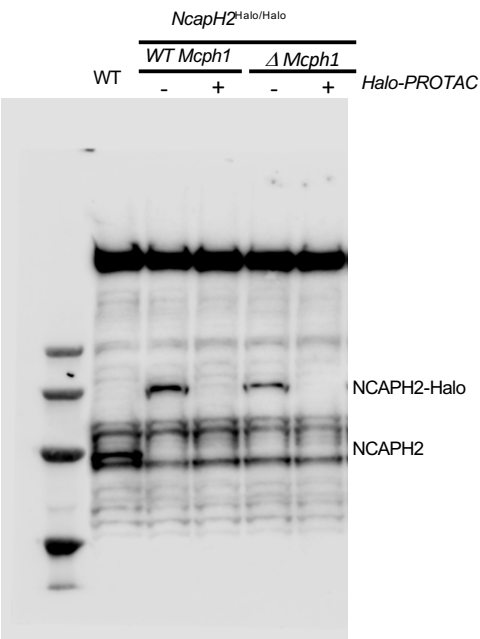

Anti – NCAPH2

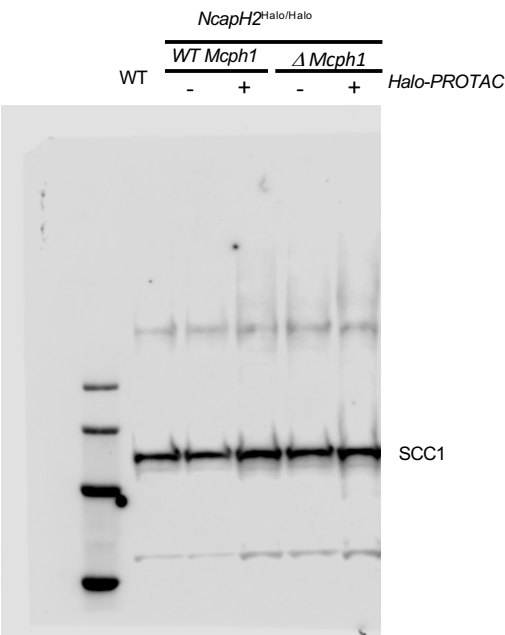

Anti – SCC1

Supplement: fig1-data2 [file Figure 1-source data 2.pdf › Figure 1-source data 2/Figure 1-source data 2.pdf]

Figure 1 – figure supplement 1

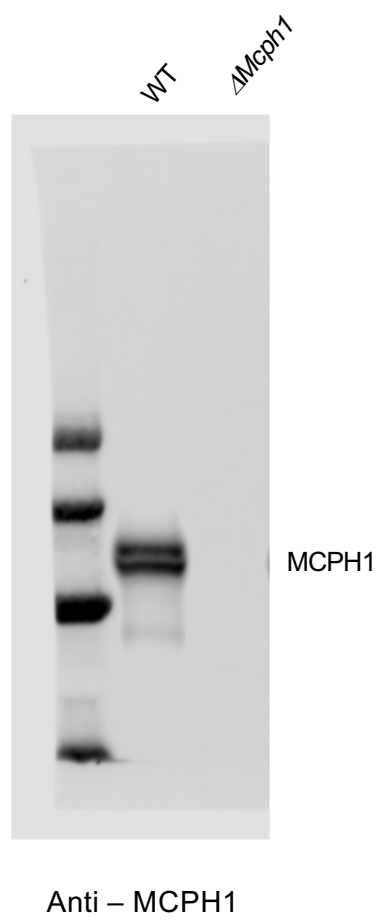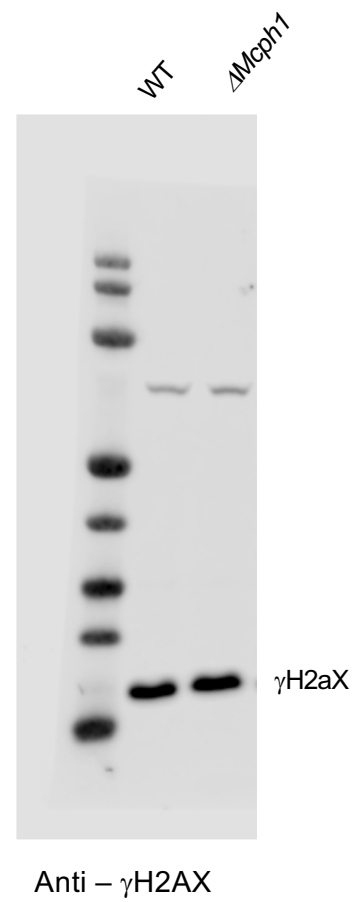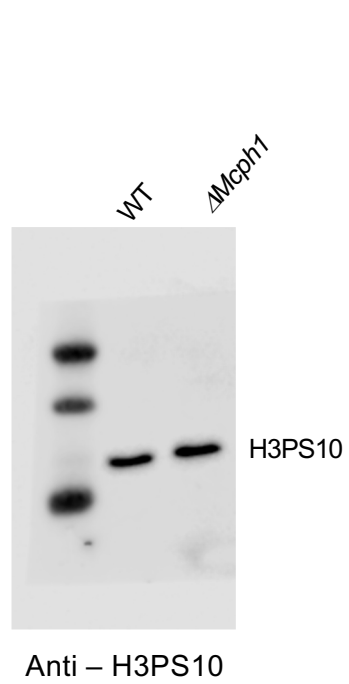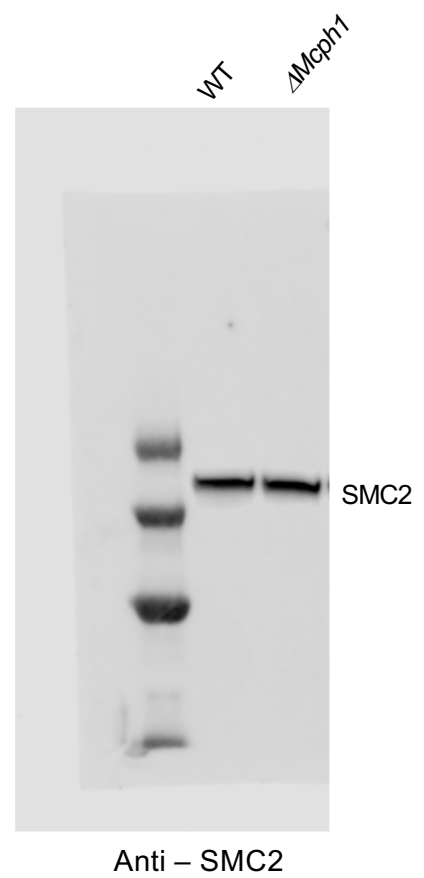

Supplement: fig1-figsupp1-data1 [file elife-73348-fig1-figsupp1-data1-v2.zip]

Figure 10 – figure supplement 1\_source data 1

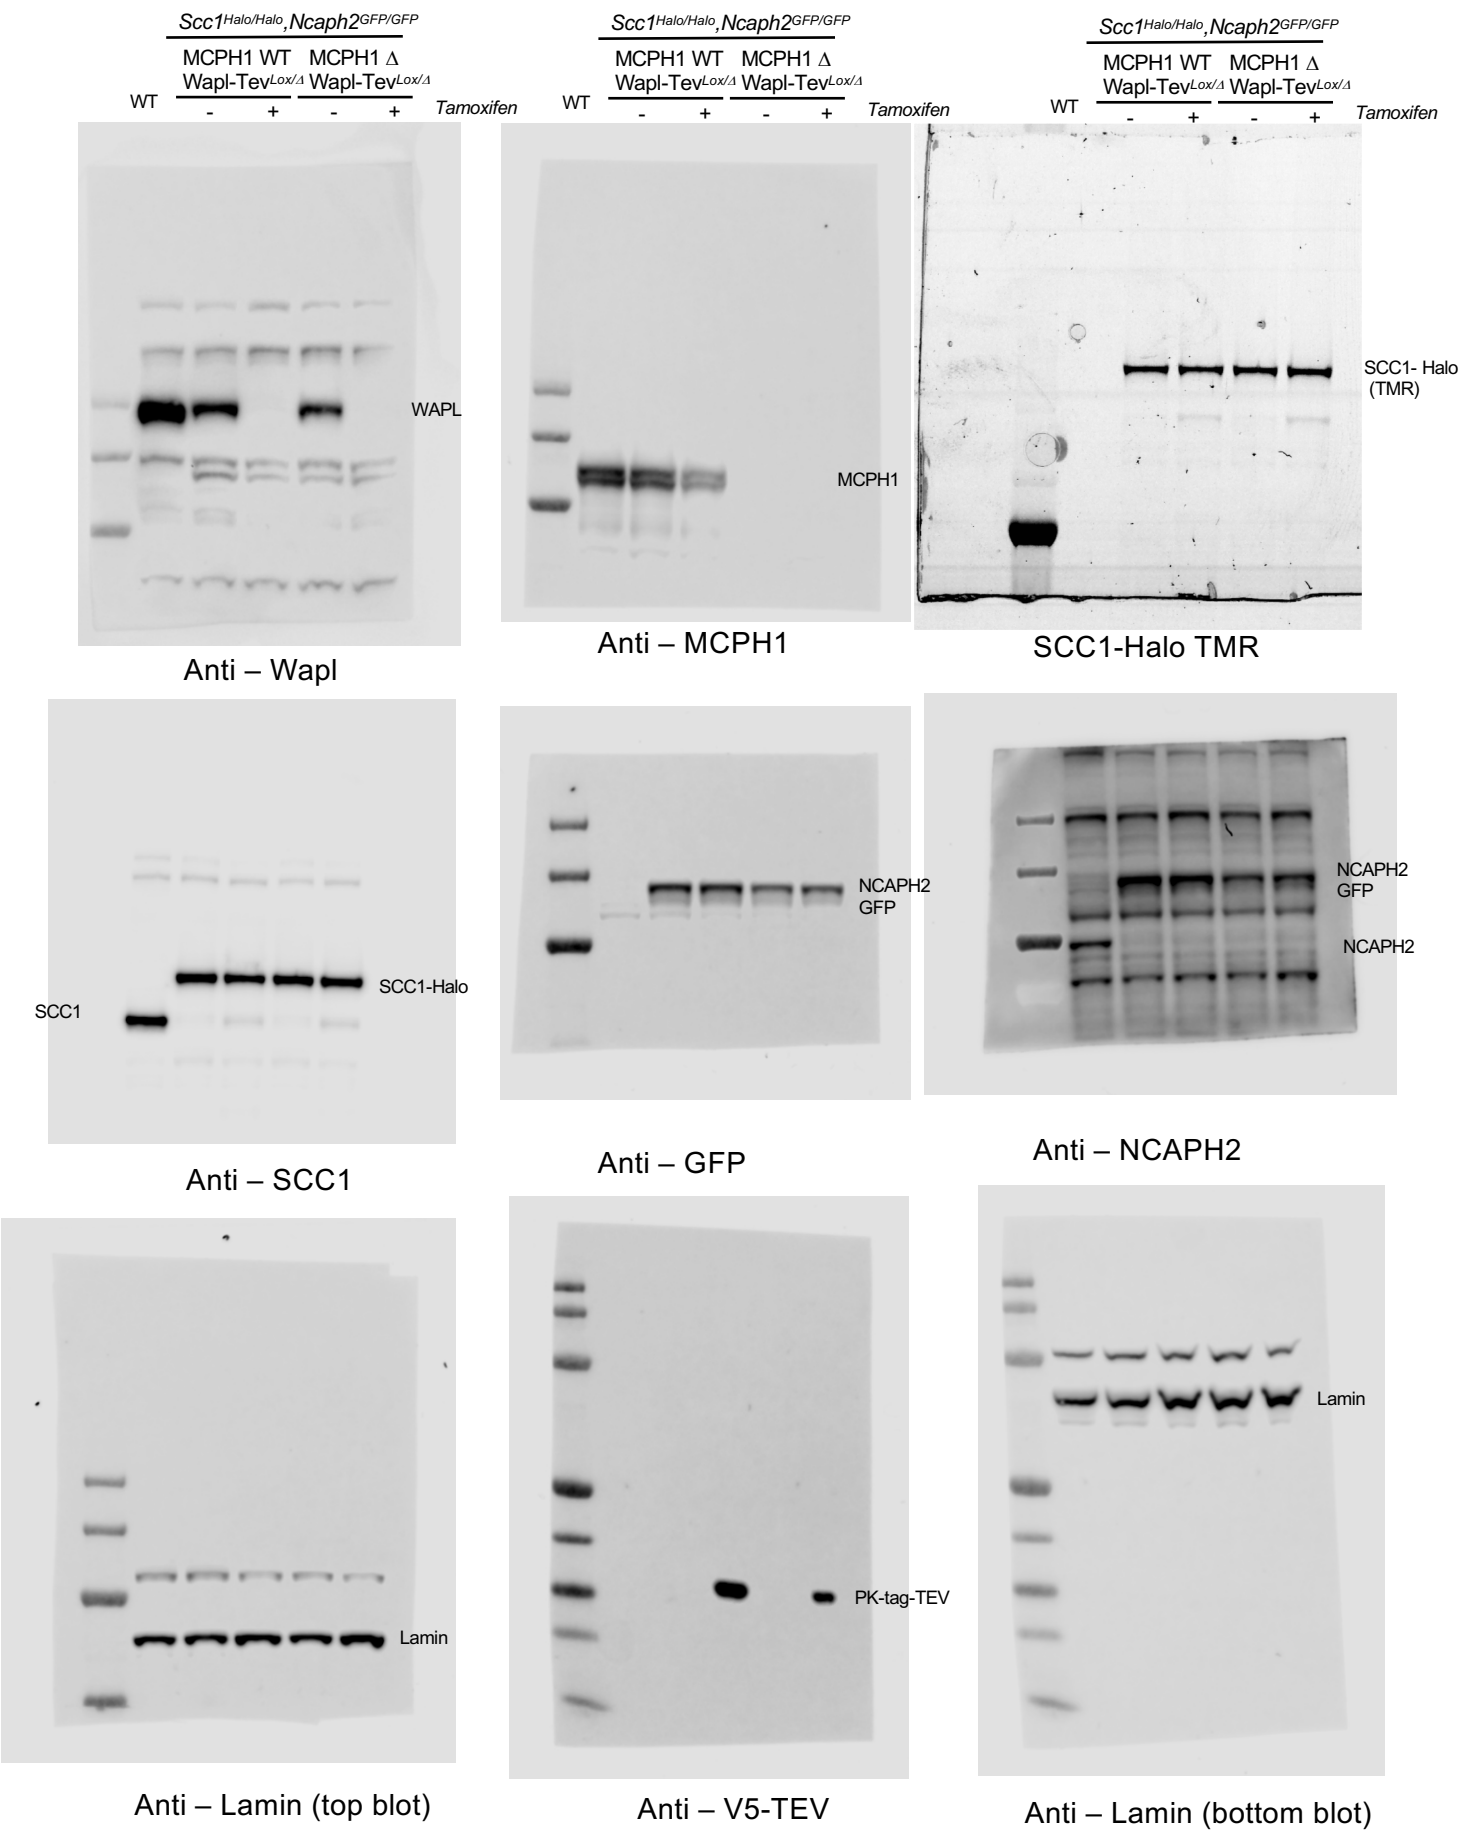

Supplement: fig10-figsupp1-data1 [file elife-73348-fig10-figsupp1-data1-v2.zip]

Figure 3 A - Source data 1

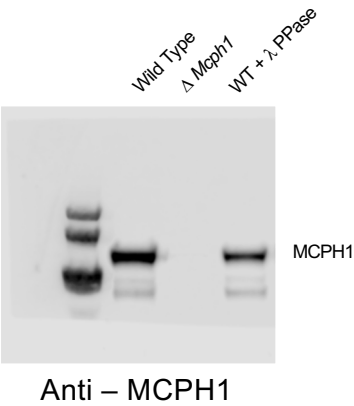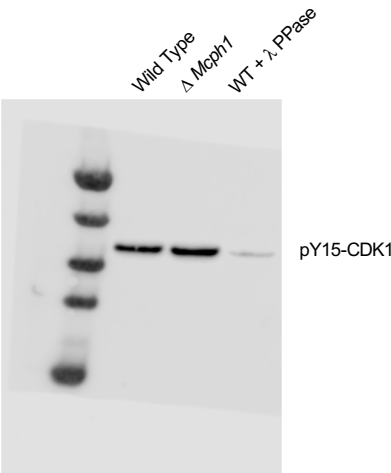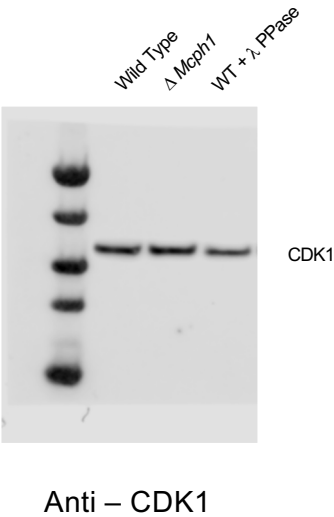

Supplement: fig3-data1 [file Figure 3A-source data 1.pdf › Figure 3-source data 1 /Figure 3A-source data 1.pdf]

Figure 5 – figure source data 1

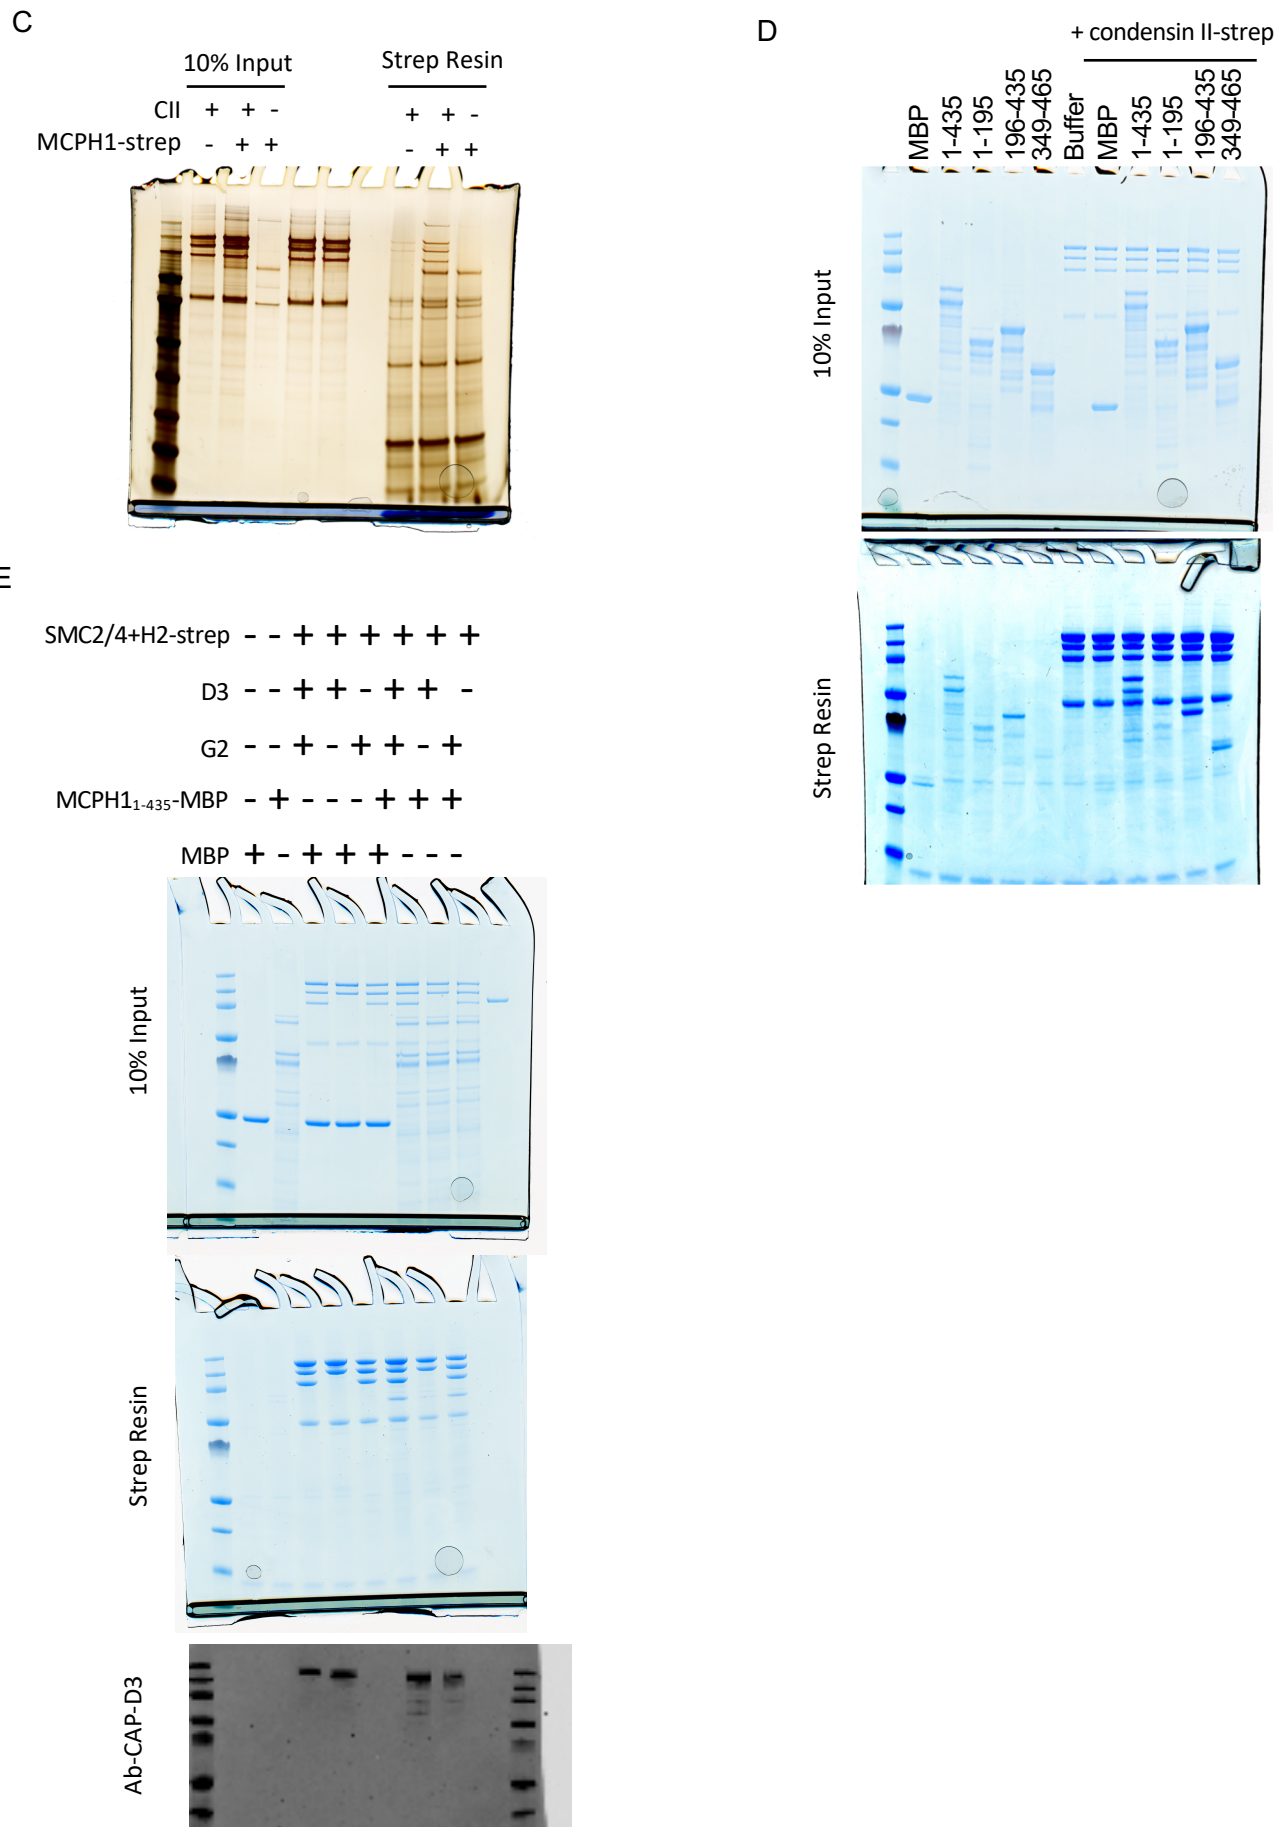

Supplement: fig5-data3 [file Figure 5-source data 1.pdf › Figure 5_source data 3/Figure 5-source data 1.pdf]

Figure 5 – figure supplement 1-figure source data 1

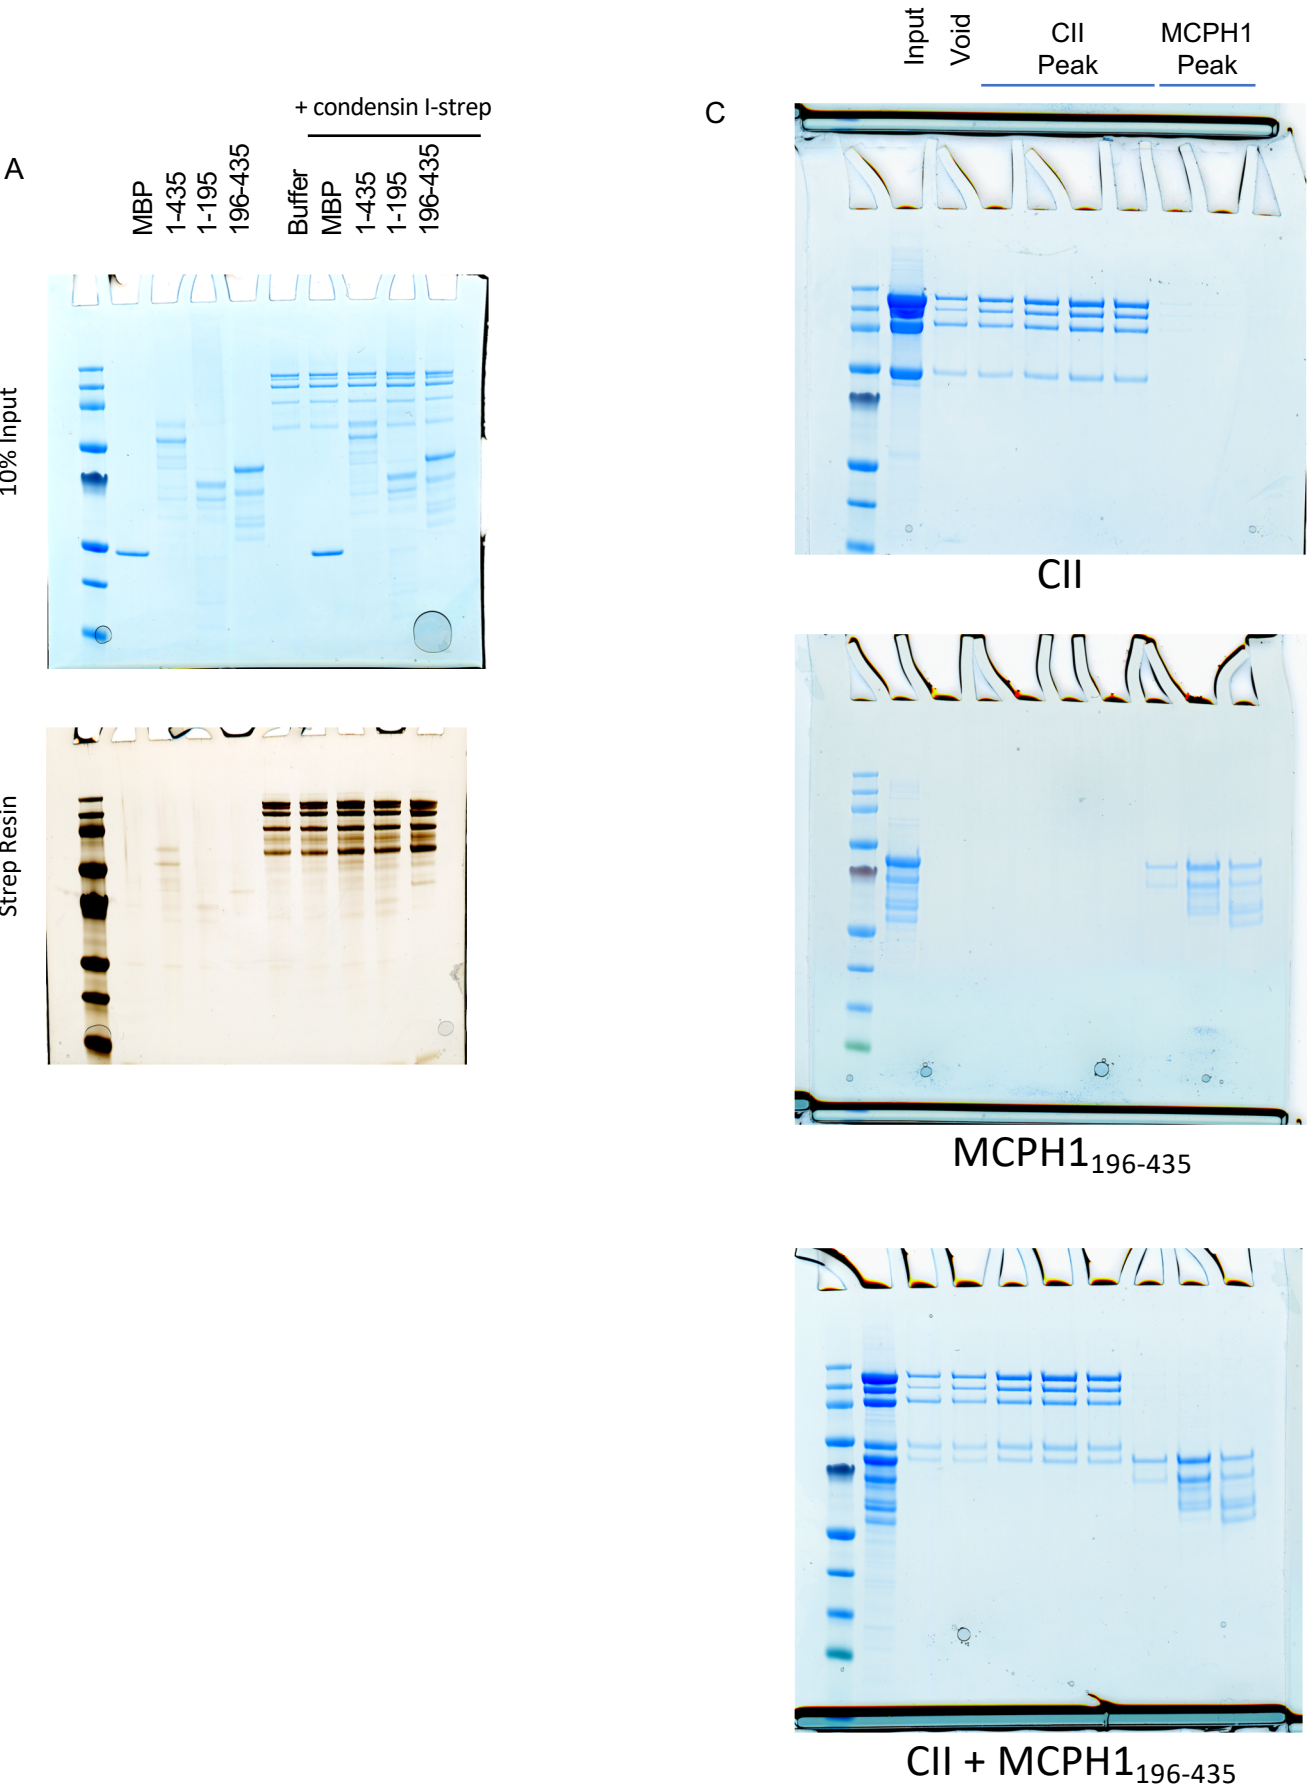

Supplement: fig5-figsupp1-data1 [file elife-73348-fig5-figsupp1-data1-v2.zip]

Figure 6 A - Source data 1

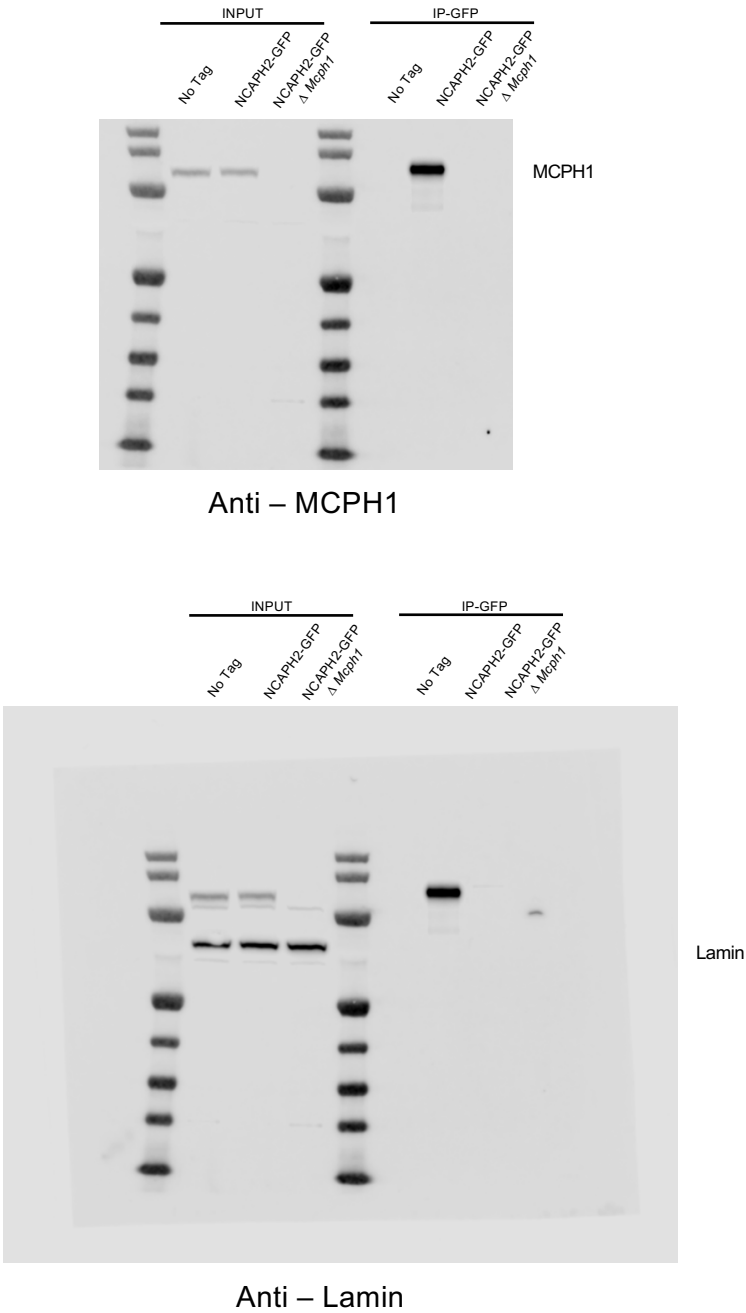

Supplement: fig6-data1 [file elife-73348-fig6-data1-v2.zip]

Figure 6 B - Source data 1

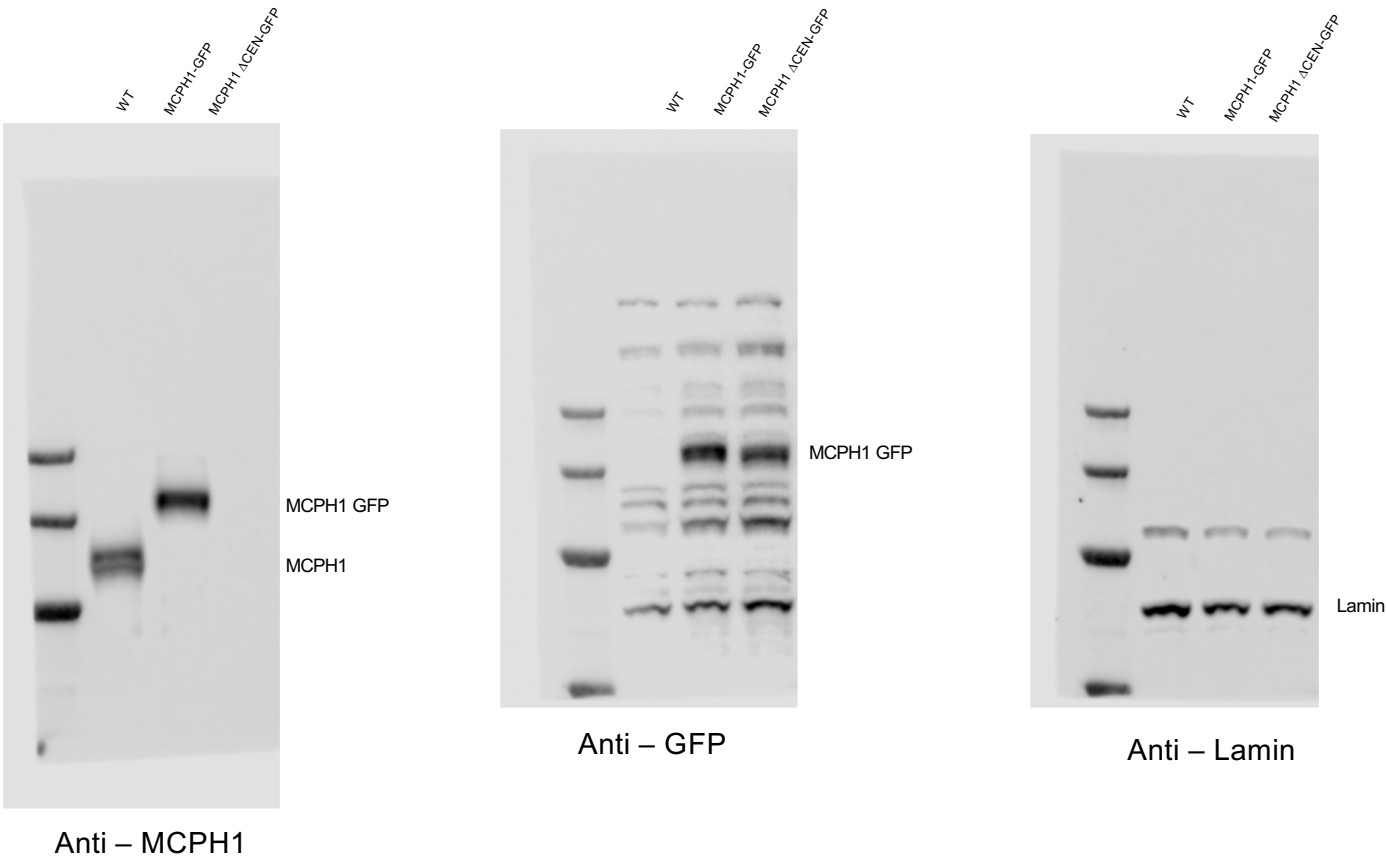

Supplement: fig6-data2 [file elife-73348-fig6-data2-v2.zip]

Figure 6 C - Source data 1

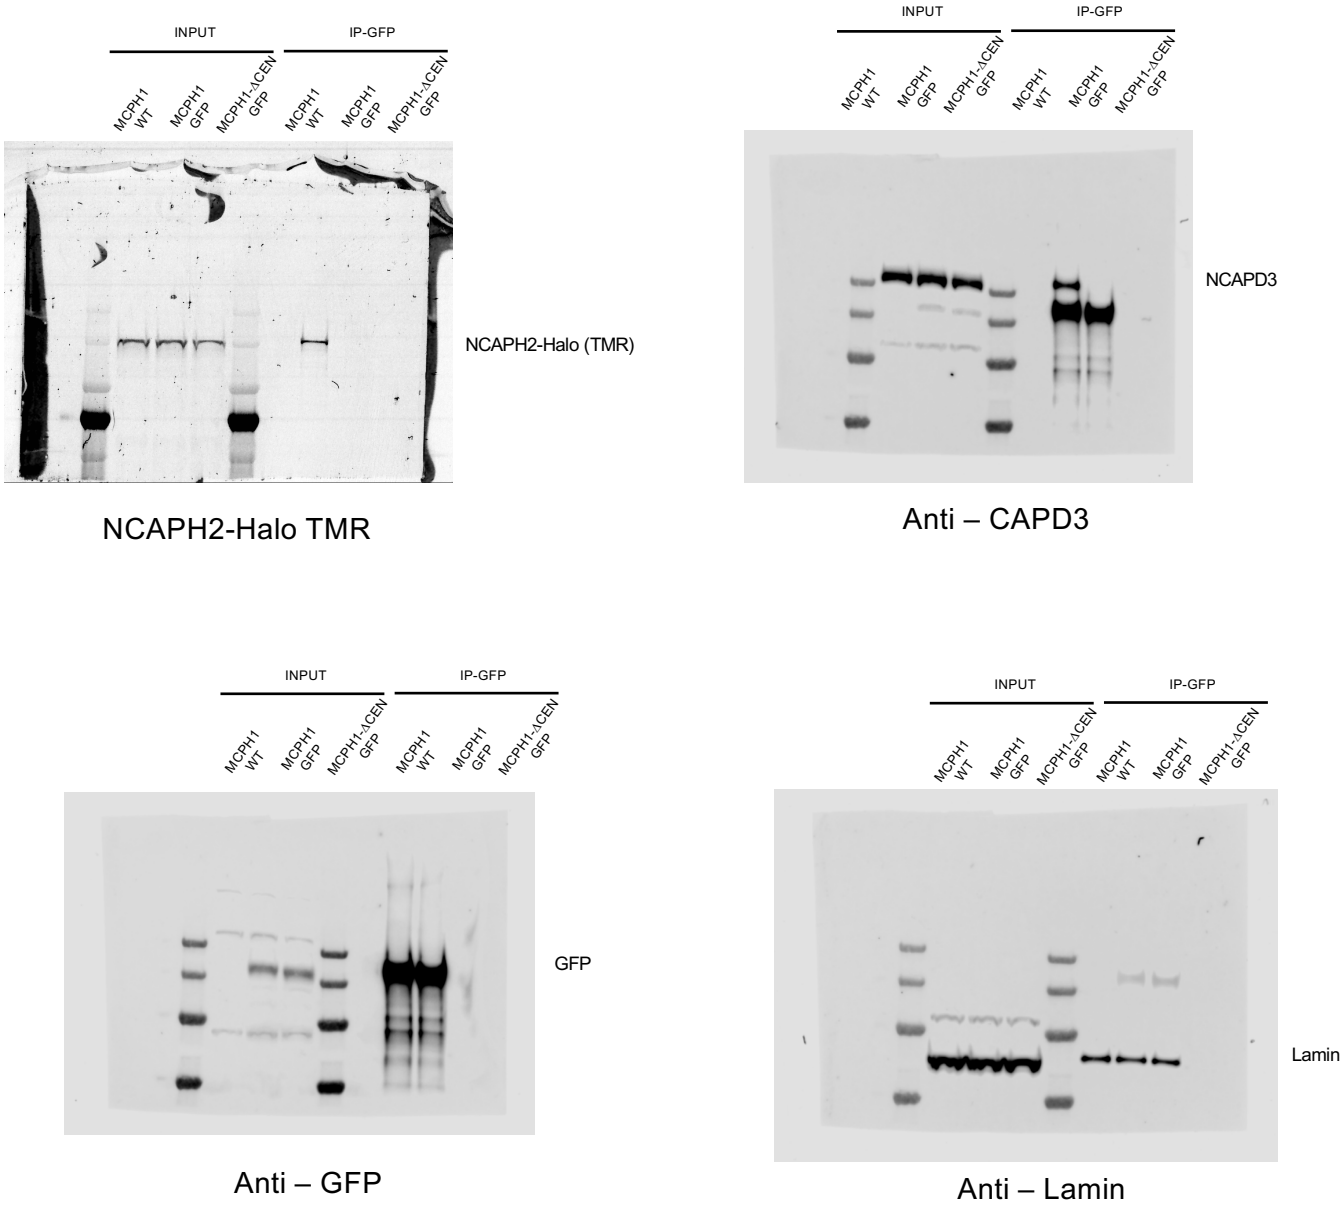

Supplement: fig6-data3 [file elife-73348-fig6-data3-v2.zip]

Figure 7 -figure source data 1

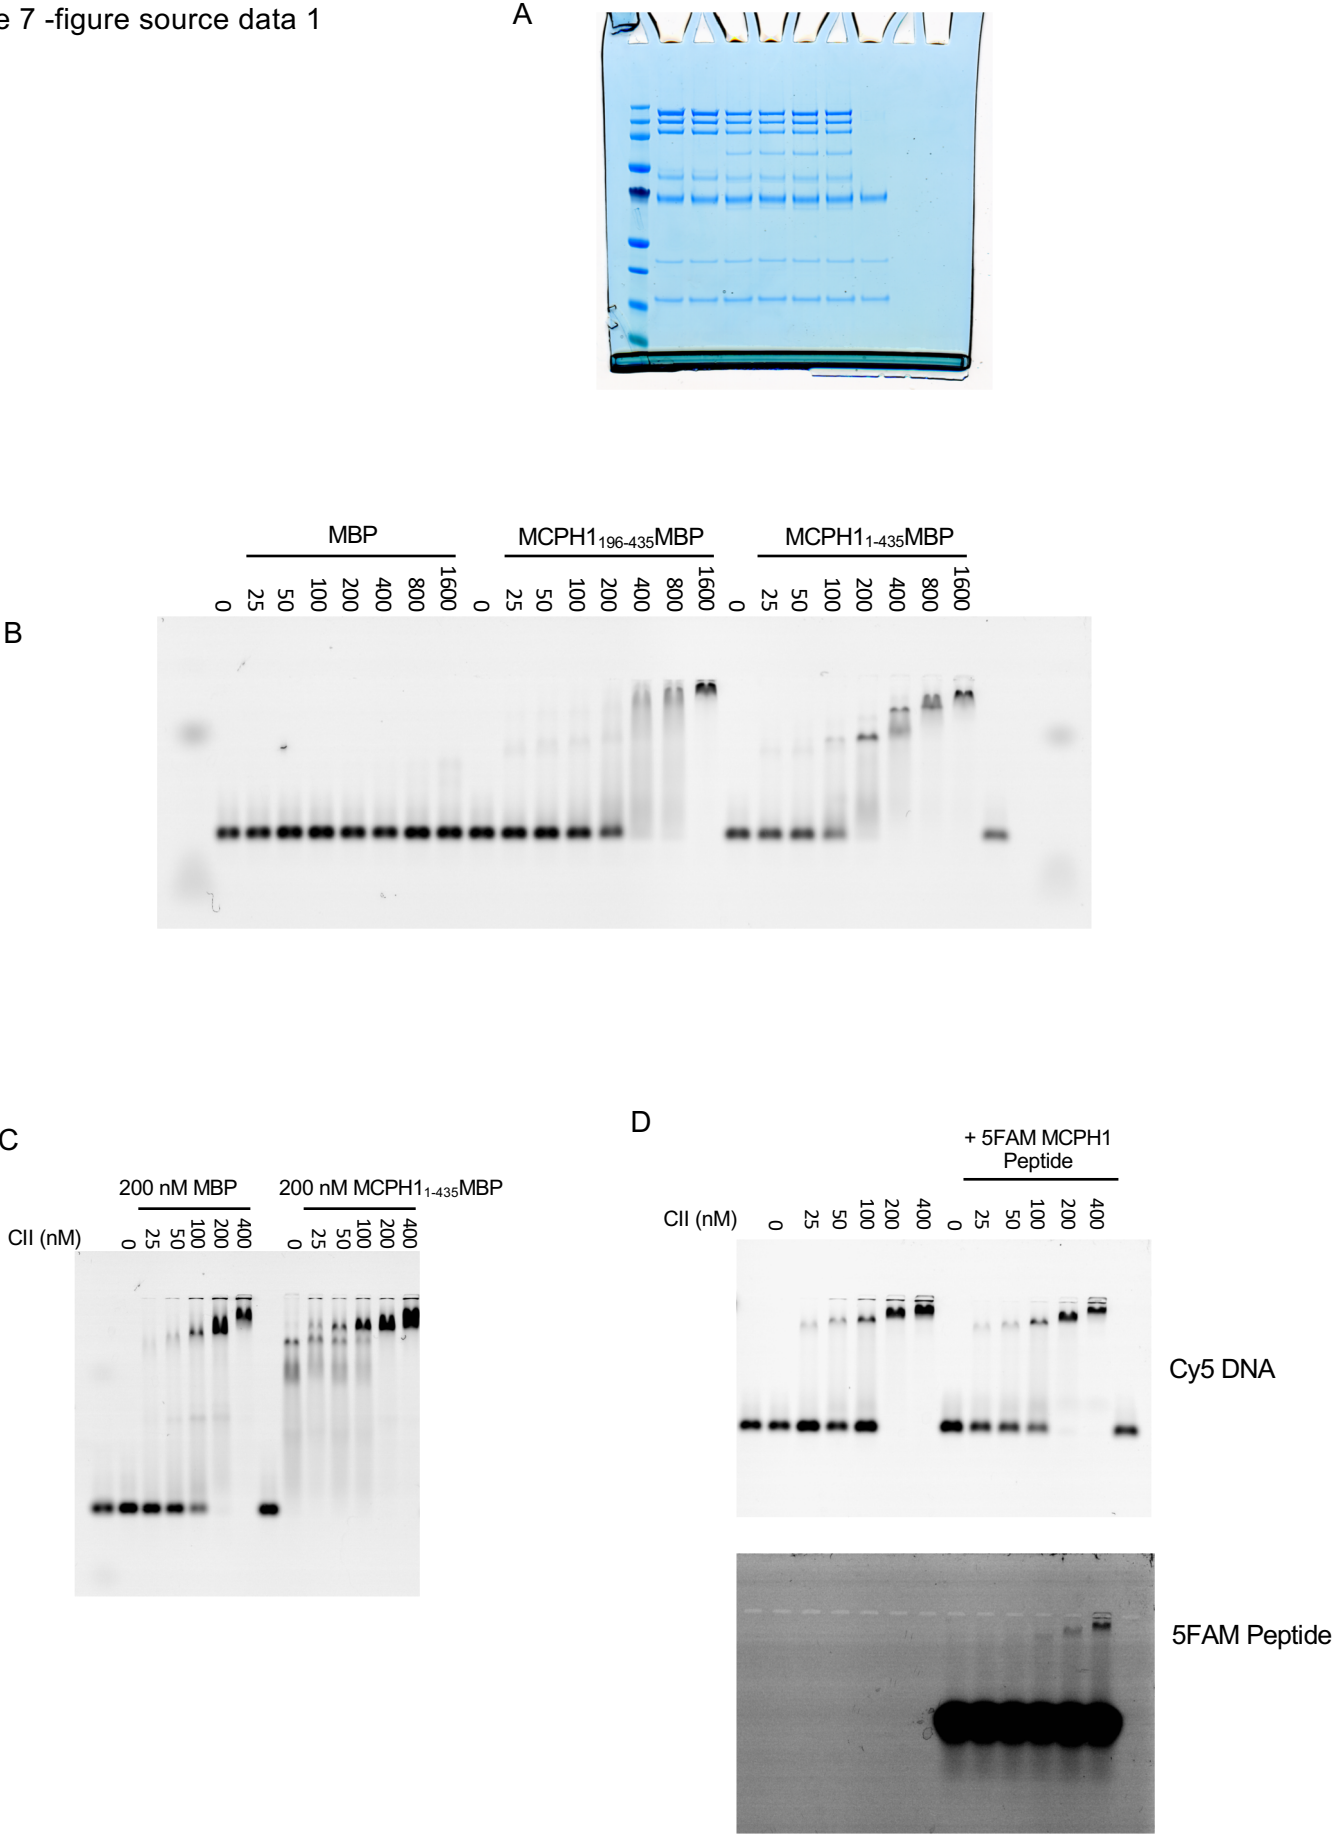

Supplement: fig7-data3 [file Figure 7-source data 1.pdf › Figure 7-source data 3/Figure 7-source data 1.pdf]
